# Supplementary material
Source: publisher figshare collection journal article supplement (https://acs.figshare.com/ndownloader/files/5887773)
Supplement: Supplementary file 1 [file 5887773]

data_cm07w 
_audit_creation_date              2015-09-24 
_audit_creation_method 
; 
Olex2 1.2 
(compiled 2015.01.26 svn.r3150 for OlexSys, GUI svn.r4998) 
; 
_audit_update_record 
; 
? 
;
 
_publ_contact_author_address      ?
_publ_contact_author_email        fout@illinois.edu 

_publ_contact_author_name         '' 
_publ_contact_author_phone        '1 217 300 0188' 
_publ_contact_author 
; 
Alison R. Fout 
University of Illinois 
School of Chemical Sciences 
A406 CLSL, Box 54-6 
600 South Mathews Avenue 
Urbana, Illinois  61801 
USA 
; 
_publ_contact_author_fax          '?' 
_publ_section_references 
; 
Bruker (2014). APEX2. Bruker AXS, Inc., Madison, Wisconsin, USA. 
 
Bruker (2014). SAINT, SHELXTL, XCIF, XPREP.  Bruker AXS, Inc., Madison, 
Wisconsin, USA. 
 
Bruker (2014).  SADABS, TWINABS. Bruker AXS, Inc., Madison, Wisconsin, USA. 
 
Dolomanov, O.V., Bourhis, L.J., Gildea, R.J, Howard, J.A.K. & Puschmann, H. 
 (2009), J. Appl. Cryst. 42, 339-341. 
 
Sheldrick, G.M. (2008). Acta Cryst. A64, 112-122; 
; 
 
_publ_requested_category         fm 
 
_publ_section_exptl_prep 
; 
Crystals were grown a saturated solution in diethyl ether. 
; 
 
_publ_section_exptl_refinement 
; 
A structural model consisting of the target molecule was developed. 
This model converged with wR2 = 0.1007 and R1 = 0.0443 for 631 
parameters with 524 restraints against 6670 data. 
 
The two mesityl groups were disordered over two positions. A hydride was found 
in the difference map.  Structural disorder over one site of the hydride atom 
(88%) and a chloride atom (12%) were modeled. 
The like C-C distance was restrained to be simliar (esd 0.01/%A). 
Similar displacement amplitudes (esd 0.01) were imposed on disordered sites 
 
H atom treatment - Methyl H atom positions, R-CH~3~, were optimized by 
rotation about R-C bonds with idealized C-H, R--H and H--H distances. 
Remaining H atoms were included as riding idealized contributors. 
Methyl H atom U's were assigned as 1.5 times U~eq~ of the carrier 
atom; remaining H atom U's were assigned as 1.2 times carrier U~eq~. 
; 
 
_publ_requested_journal           'Chemical Science' 
_publ_requested_coeditor_name     ? 
 
_publ_section_title 
; 
 ? 
; 
 
_publ_section_abstract 
; 
 ? 
; 
 
_publ_section_comment 
; 
 ? 
; 
 
_publ_section_acknowledgements 
; 
The Materials Chemistry Laboratory at the University of Illinois was 
supported in part by grants NSF CHE 95-03145 and NSF CHE 03-43032 
from the National Science Foundation. 
; 
 
_chemical_name_common            ? 
_chemical_name_systematic 
; 
C41 H42 Cl Co N4 P 
; 
 
_chemical_formula_moiety         ? 
_chemical_formula_sum             'C41 H42.18 Cl1.12 Co N4 P' 
_chemical_formula_structural     ? 
_chemical_formula_weight          720.66 
_chemical_formula_iupac          ? 
_chemical_formula_analytical     ? 
_chemical_melting_point          ? 
_chemical_absolute_configuration ? 
_chemical_compound_source        ? 
 
loop_ 
  _atom_type_symbol 
  _atom_type_description 
  _atom_type_scat_dispersion_real 
  _atom_type_scat_dispersion_imag 
  _atom_type_scat_source 
 'C' 'C' 0.0033 0.0016 'International Tables Vol C Tables 4.2.6.8 and 6.1.1.4' 
 'H' 'H' 0.0000 0.0000 'International Tables Vol C Tables 4.2.6.8 and 6.1.1.4' 
 'Cl' 'Cl' 0.1484 0.1585 'Intntl Tables Vol C Tables 4.2.6.8  and 6.1.1.4' 
 'Co' 'Co' 0.3494 0.9721 'Intntl Tables Vol C Tables 4.2.6.8 and 6.1.1.4' 
 'N' 'N' 0.0061 0.0033 'International Tables Vol C Tables 4.2.6.8 and 6.1.1.4' 
 'P' 'P' 0.1023 0.0942 'International Tables Vol C Tables 4.2.6.8 and 6.1.1.4' 
 
_space_group_crystal_system       'monoclinic' 
_space_group_IT_number            14 
_space_group_name_H-M_alt         'P 1 21/n 1' 
_space_group_name_Hall            '-P 2yn' 
loop_ 
  _space_group_symop_id 
  _space_group_symop_operation_xyz 
 1 'x, y, z' 
 2 '-x+1/2, y+1/2, -z+1/2' 
 3 '-x, -y, -z' 
 4 'x-1/2, -y-1/2, z-1/2' 
 
_cell_length_a                    12.2774(5) 
_cell_length_b                    18.0919(7) 
_cell_length_c                    16.3936(7) 
_cell_angle_alpha                 90.00 
_cell_angle_beta                  94.5253(17) 
_cell_angle_gamma                 90.00 
_cell_volume                      3630.0(3) 
_cell_formula_units_Z             4 
_cell_measurement_reflns_used    6649 
_cell_measurement_temperature    100(2) 
_cell_measurement_theta_max      22.62 
_cell_measurement_theta_min      2.29 
_exptl_absorpt_coefficient_mu     0.634 
_exptl_absorpt_correction_T_max  0.1362 
_exptl_absorpt_correction_T_min  0.0291 
_exptl_absorpt_correction_type   integration 
_exptl_absorpt_process_details   'SADABS V2014/4 (Bruker, 2014)' 
 
_exptl_crystal_colour            'orange' 
_exptl_crystal_colour_primary     orange 
_exptl_crystal_density_diffrn     1.319 
_exptl_crystal_density_meas      ? 
_exptl_crystal_density_method    'not measured' 
_exptl_crystal_description       'plate' 
_exptl_crystal_F_000              1509 
_exptl_crystal_size_max          0.146 
_exptl_crystal_size_mid          0.141 
_exptl_crystal_size_min          0.049 
_exptl_crystal_id                cm07w 
 
_exptl_crystal_preparation 
; 
The data crystal was mounted using oil (Parantone-N, Exxon) to a 
0.3 mm cryo-loop (Hampton Research) with the (-1 -4 2) scattering 
planes roughly normal to the spindle axis. 
; 
_exptl_special_details 
; 
One distinct cell was identified using APEX2 (Bruker, 2014).  Eight 
frame series were integrated and filtered for statistical outliers 
using SAINT (Bruker, 2013) then corrected for absorption by 
integration using SADABS v2014/2 (Bruker, 2014). 
No decay correction was applied. 
; 
 
_diffrn_reflns_av_R_equivalents   0.0664 
_diffrn_reflns_av_unetI/netI      0.0515 
_diffrn_reflns_limit_h_max        12 
_diffrn_reflns_limit_h_min        -14 
_diffrn_reflns_limit_k_max        21 
_diffrn_reflns_limit_k_min        -21 
_diffrn_reflns_limit_l_max        19 
_diffrn_reflns_limit_l_min        -19 
_diffrn_reflns_number            6670 
 
_diffrn_reflns_theta_full         25.42 
_diffrn_reflns_theta_max          25.42 
_diffrn_reflns_theta_min          2.16 
_diffrn_ambient_temperature      100(2) 
_diffrn_detector_area_resol_mean  ? 
_diffrn_measured_fraction_theta_full 0.996 
_diffrn_measured_fraction_theta_max 0.996 
_diffrn_measurement_device_type   'Bruker APEX-II CCD' 
_diffrn_measurement_device       'Bruker Kappa/ApexII CCD' 
_diffrn_measurement_method       'profile data from \f and \w scans' 
_diffrn_radiation_monochromator  'graphite' 
_diffrn_radiation_type           'MoK\a' 
_diffrn_radiation_wavelength      0.71073 
_diffrn_radiation_source         'fine-focus sealed tube' 
_diffrn_radiation_wavelength_id  cm07w 
_diffrn_source                    'fine-focus sealed tube' 
_diffrn_standards_decay_%        ? 
_diffrn_standards_interval_count  ? 
_diffrn_standards_interval_time  ? 
 
_diffrn_standards_number         ? 
_reflns_number_gt                 4922 
_reflns_number_total              6670 
_reflns_threshold_expression      >2sigma(I) 
_computing_cell_refinement       'SAINT V8.34A (Bruker, 2005)' 
_computing_data_collection       'APEX2 V2014.9-0 (Bruker, 2014)' 
 
_computing_data_reduction 
; 
SAINT V8.34A, XPREP v2014/2, SADABS V2014/4, TWINABS V2012/1 
(Bruker, 2012 & 2014) 
; 
_computing_molecular_graphics     'Olex2 (Dolomanov et al., 2009)' 
_computing_publication_material  'XCIF V2014-2 (Bruker, 2014)' 
 
_computing_structure_refinement 
; 
SHELX-2014-6 (Sheldrick, 2014) 
Olex2 1.2.6 (Dolomanov et. al., 2009) 
; 
_computing_structure_solution    'SHELX-97 (Sheldrick, 2008)' 
_refine_diff_density_max          0.344 
_refine_diff_density_min          -0.307 
_refine_diff_density_rms          0.055 
_refine_ls_extinction_coef        ? 
_refine_ls_extinction_method      none 
_refine_ls_goodness_of_fit_ref    1.016 
_refine_ls_hydrogen_treatment     mixed 
_refine_ls_matrix_type            full 
_refine_ls_number_parameters      631 
_refine_ls_number_reflns          6670 
_refine_ls_number_restraints      524 
_refine_ls_R_factor_all           0.0720 
_refine_ls_R_factor_gt            0.0443 
_refine_ls_restrained_S_all       0.987 
_refine_ls_shift/su_max           0.001 
_refine_ls_shift/su_mean          0.000 
_refine_ls_structure_factor_coef  Fsqd 
_refine_ls_weighting_details 
'calc w=1/[\s^2^(Fo^2^)+(0.0397P)^2^+2.7575P] where P=(Fo^2^+2Fc^2^)/3' 
_refine_ls_weighting_scheme       calc 
_refine_ls_wR_factor_gt           0.0915 
_refine_ls_wR_factor_ref          0.1006 
_refine_ls_abs_structure_details ? 
_refine_special_details 
; 
Structure was phased by direct methods (Sheldrick,2014).  Systematic 
conditions suggested the unambiguous space group. The space group 
choice was confirmed by successful convergence of the full-matrix 
least-squares refinement on F^2^.  The final difference Fourier map 
had no significant features.  The final analysis of variance between 
observed and calculated structure factors showed little 
dependence on amplitude and little dependence on resolution. 
; 
 
_olex2_refinement_description 
; 
1. Fixed Uiso 
 At 1.2 times of: 
  All C(H) groups 
 At 1.5 times of: 
  All C(H,H) groups, All C(H,H,H) groups 
2. Restrained distances 
 N1-C21 \\sim N1-C21A 
 with sigma of 0.01 
 N4-C30 \\sim N4-C30A 
 with sigma of 0.01 
3. Uiso/Uaniso restraints and constraints 
C21 \\sim C22 \\sim C23 \\sim C24 \\sim C25 \\sim C26 \\sim C27 \\sim C28 \\sim 
C29 \\sim C21A \\sim C22A \\sim C23A \\sim C24A \\sim C25A \\sim C26A \\sim 
C27A \\sim C28A \\sim C29A: within 1.7A with sigma of 0.01 and sigma for 
terminal atoms of 0.02 
C30 \\sim C31 \\sim C32 \\sim C33 \\sim C34 \\sim C35 \\sim C36 \\sim C37 \\sim 
C38 \\sim C30A \\sim C31A \\sim C32A \\sim C33A \\sim C34A \\sim C35A \\sim 
C36A \\sim C37A \\sim C38A: within 1.7A with sigma of 0.01 and sigma for 
terminal atoms of 0.02 
4. Same fragment restrains 
{C21, C22, C23, C24, C25, C26, C27, C28, C29} sigma for 1-2: 0.01, 1-3: 0.04 
as 
{C21A, C22A, C23A, C24A, C25A, C26A, C27A, C28A, C29A} 
{C30, C31, C32, C33, C34, C35, C36, C37, C38} sigma for 1-2: 0.01, 1-3: 0.04 
as 
{C30A, C31A, C32A, C33A, C34A, C35A, C36A, C37A, C38A} 
5. Others 
 Sof(C21A)=Sof(C22A)=Sof(C23A)=Sof(H23A)=Sof(C24A)=Sof(C25A)=Sof(H25A)= 
 Sof(C26A)=Sof(C27A)=Sof(H27D)=Sof(H27E)=Sof(H27F)=Sof(C28A)=Sof(H28D)= 
 Sof(H28E)=Sof(H28F)=Sof(C29A)=Sof(H29D)=Sof(H29E)=1-FVAR(1) 
 Sof(C21)=Sof(C22)=Sof(C23)=Sof(H23)=Sof(C24)=Sof(C25)=Sof(H25)=Sof(C26)= 
 Sof(C27)=Sof(H27A)=Sof(H27B)=Sof(H27C)=Sof(C28)=Sof(H28A)=Sof(H28B)=Sof(H28C)= 
 Sof(C29)=Sof(H29A)=Sof(H29B)=Sof(H29C)=FVAR(1) 
 Sof(C30A)=Sof(C31A)=Sof(C32A)=Sof(H32A)=Sof(C33A)=Sof(C34A)=Sof(H34A)= 
 Sof(C35A)=Sof(C36A)=Sof(H36D)=Sof(H36E)=Sof(H36F)=Sof(C37A)=Sof(H37D)= 
 Sof(H37E)=Sof(H37F)=Sof(C38A)=Sof(H38D)=Sof(H38E)=Sof(H38F)=1-FVAR(2) 
 Sof(C30)=Sof(C31)=Sof(C32)=Sof(H32)=Sof(C33)=Sof(C34)=Sof(H34)=Sof(C35)= 
 Sof(C36)=Sof(H36A)=Sof(H36B)=Sof(H36C)=Sof(C37)=Sof(H37A)=Sof(H37B)=Sof(H37C)= 
 Sof(C38)=Sof(H38A)=Sof(H38B)=Sof(H38C)=FVAR(2) 
 Sof(Cl2)=1-FVAR(3) 
 Sof(H)=FVAR(3) 
6.a Aromatic/amide H refined with riding coordinates: 
 C3(H3), C4(H4), C5(H5), C6(H6), C9(H9), C10(H10), C11(H11), C15(H15), 
 C16(H16), C17(H17), C18(H18), C23(H23), C25(H25), C23A(H23A), C25A(H25A), 
 C32(H32), C34(H34), C32A(H32A), C34A(H34A) 
6.b Idealised Me refined as rotating group: 
 C27(H27A,H27B,H27C), C28(H28A,H28B,H28C), C29(H29A,H29B,H29C), C27A(H27D,H27E, 
 H27F), C28A(H28D,H28E,H28F), C36(H36A,H36B,H36C), C37(H37A,H37B,H37C), 
 C38(H38A,H38B,H38C), C36A(H36D,H36E,H36F), C37A(H37D,H37E,H37F), C38A(H38D, 
 H38E,H38F), C39(H39A,H39B,H39C), C40(H40A,H40B,H40C), C41(H41A,H41B,H41C) 
; 
_atom_sites_solution_hydrogens    geom 
_atom_sites_solution_primary      direct 
_atom_sites_solution_secondary    difmap 
loop_ 
  _atom_site_label 
  _atom_site_type_symbol 
  _atom_site_fract_x 
  _atom_site_fract_y 
  _atom_site_fract_z 
  _atom_site_U_iso_or_equiv 
  _atom_site_adp_type 
  _atom_site_occupancy 
  _atom_site_calc_flag 
  _atom_site_disorder_assembly 
  _atom_site_disorder_group 
  _atom_site_refinement_flags_posn 
  _atom_site_refinement_flags_adp 
 Co1 Co 0.19592(3) 0.31322(2) 0.56064(2) 0.02435(11) Uani 1 d . . . . 
 Cl1 Cl 0.36487(5) 0.29934(4) 0.63093(4) 0.03122(18) Uani 1 d C . . . 
 P1 P 0.11903(6) 0.22653(4) 0.63315(5) 0.03001(19) Uani 1 d C . . . 
 N2 N 0.12757(17) 0.24746(11) 0.41019(13) 0.0238(5) Uani 1 d . . . . 
 N1 N 0.29704(17) 0.21324(12) 0.43317(13) 0.0245(5) Uani 1 d . . D . 
 N3 N 0.03672(18) 0.41643(12) 0.59763(13) 0.0288(5) Uani 1 d . . . . 
 N4 N 0.17267(19) 0.43801(12) 0.68781(13) 0.0302(5) Uani 1 d . . D . 
 C1 C 0.2173(2) 0.25197(14) 0.46746(15) 0.0237(6) Uani 1 d A . . . 
 C2 C 0.2615(2) 0.18781(15) 0.35451(16) 0.0268(6) Uani 1 d A . . . 
 C3 C 0.3143(2) 0.14834(17) 0.29755(17) 0.0359(7) Uani 1 d . . . . 
 H3 H 0.3875 0.1319 0.3085 0.043 Uiso 1 calc A . R . 
 C4 C 0.2560(2) 0.13374(18) 0.22383(18) 0.0403(8) Uani 1 d A . . . 
 H4 H 0.2901 0.1071 0.1829 0.048 Uiso 1 calc . . R . 
 C5 C 0.1483(2) 0.15709(16) 0.20801(17) 0.0351(7) Uani 1 d . . . . 
 H5 H 0.1109 0.1462 0.1565 0.042 Uiso 1 calc A . R . 
 C6 C 0.0949(2) 0.19553(15) 0.26524(16) 0.0304(6) Uani 1 d A . . . 
 H6 H 0.0212 0.2110 0.2545 0.036 Uiso 1 calc . . R . 
 C7 C 0.1530(2) 0.21067(14) 0.33918(16) 0.0247(6) Uani 1 d A . . . 
 C8 C 0.0356(2) 0.28916(14) 0.43028(16) 0.0263(6) Uani 1 d C . . . 
 C9 C -0.0662(2) 0.29553(16) 0.38781(17) 0.0326(7) Uani 1 d . . . . 
 H9 H -0.0848 0.2675 0.3397 0.039 Uiso 1 calc C . R . 
 C10 C -0.1399(2) 0.34466(17) 0.41855(17) 0.0376(7) Uani 1 d C . . . 
 H10 H -0.2106 0.3493 0.3910 0.045 Uiso 1 calc . . R . 
 C11 C -0.1142(2) 0.38733(16) 0.48803(17) 0.0356(7) Uani 1 d . . . . 
 H11 H -0.1653 0.4214 0.5072 0.043 Uiso 1 calc C . R . 
 C12 C -0.0121(2) 0.37840(15) 0.52799(16) 0.0293(6) Uani 1 d C . . . 
 C13 C 0.0622(2) 0.32788(14) 0.50169(16) 0.0255(6) Uani 1 d C . . . 
 C14 C 0.0031(2) 0.47528(15) 0.64452(17) 0.0323(7) Uani 1 d B . . . 
 C15 C -0.0905(3) 0.51894(16) 0.6408(2) 0.0402(8) Uani 1 d . . . . 
 H15 H -0.1493 0.5110 0.6005 0.048 Uiso 1 calc C . R . 
 C16 C -0.0937(3) 0.57449(18) 0.6986(2) 0.0502(9) Uani 1 d C . . . 
 H16 H -0.1562 0.6055 0.6977 0.060 Uiso 1 calc . . R . 
 C17 C -0.0088(3) 0.58622(19) 0.7574(2) 0.0543(10) Uani 1 d . . . . 
 H17 H -0.0148 0.6245 0.7965 0.065 Uiso 1 calc C . R . 
 C18 C 0.0854(3) 0.54318(17) 0.76072(19) 0.0445(8) Uani 1 d B . . . 
 H18 H 0.1441 0.5512 0.8010 0.053 Uiso 1 calc . . R . 
 C19 C 0.0892(2) 0.48804(15) 0.70245(17) 0.0330(7) Uani 1 d B . . . 
 C20 C 0.1418(2) 0.39326(15) 0.62280(16) 0.0274(6) Uani 1 d B . . . 
 C21 C 0.4056(13) 0.1970(14) 0.471(3) 0.031(2) Uani 0.303(11) d A 1 D U 
 C22 C 0.4222(12) 0.1280(11) 0.5076(15) 0.033(2) Uani 0.303(11) d A 1 D U 
 C23 C 0.5264(11) 0.1132(9) 0.5458(10) 0.039(3) Uani 0.303(11) d A 1 D U 
 H23 H 0.5391 0.0666 0.5714 0.047 Uiso 0.303(11) calc A 1 R . 
 C24 C 0.6113(9) 0.1638(10) 0.5477(9) 0.042(2) Uani 0.303(11) d A 1 D U 
 C25 C 0.5935(10) 0.2311(10) 0.5083(10) 0.037(3) Uani 0.303(11) d A 1 D U 
 H25 H 0.6509 0.2663 0.5088 0.044 Uiso 0.303(11) calc A 1 R . 
 C26 C 0.4920(11) 0.2476(10) 0.4678(13) 0.035(2) Uani 0.303(11) d A 1 D U 
 C27 C 0.3323(16) 0.0721(12) 0.507(2) 0.040(4) Uani 0.303(11) d A 1 D U 
 H27A H 0.3054 0.0611 0.4506 0.060 Uiso 0.303(11) calc A 1 GR . 
 H27B H 0.2724 0.0918 0.5369 0.060 Uiso 0.303(11) calc A 1 GR . 
 H27C H 0.3602 0.0266 0.5339 0.060 Uiso 0.303(11) calc A 1 GR . 
 C28 C 0.7217(10) 0.1471(13) 0.5925(11) 0.072(5) Uani 0.303(11) d A 1 D U 
 H28A H 0.7238 0.0952 0.6100 0.108 Uiso 0.303(11) calc A 1 GR . 
 H28B H 0.7328 0.1792 0.6406 0.108 Uiso 0.303(11) calc A 1 GR . 
 H28C H 0.7796 0.1560 0.5559 0.108 Uiso 0.303(11) calc A 1 GR . 
 C29 C 0.4657(19) 0.3195(10) 0.4255(15) 0.045(4) Uani 0.303(11) d A 1 D U 
 H29A H 0.4283 0.3520 0.4620 0.068 Uiso 0.303(11) calc A 1 GR . 
 H29B H 0.4182 0.3104 0.3756 0.068 Uiso 0.303(11) calc A 1 GR . 
 H29C H 0.5335 0.3430 0.4111 0.068 Uiso 0.303(11) calc A 1 GR . 
 C21A C 0.4096(5) 0.2074(6) 0.4653(11) 0.0291(13) Uani 0.697(11) d A 2 D U 
 C22A C 0.4446(5) 0.1418(5) 0.5025(6) 0.0320(15) Uani 0.697(11) d A 2 D U 
 C23A C 0.5536(5) 0.1382(4) 0.5348(4) 0.0358(15) Uani 0.697(11) d A 2 D U 
 H23A H 0.5800 0.0942 0.5610 0.043 Uiso 0.697(11) calc A 2 R . 
 C24A C 0.6229(4) 0.1975(4) 0.5291(4) 0.0341(16) Uani 0.697(11) d A 2 D U 
 C25A C 0.5849(4) 0.2607(4) 0.4883(4) 0.0372(15) Uani 0.697(11) d A 2 D U 
 H25A H 0.6339 0.3008 0.4834 0.045 Uiso 0.697(11) calc A 2 R . 
 C26A C 0.4777(5) 0.2677(4) 0.4543(5) 0.0319(15) Uani 0.697(11) d A 2 D U 
 C27A C 0.3689(7) 0.0776(6) 0.5103(9) 0.042(2) Uani 0.697(11) d A 2 D U 
 H27D H 0.3392 0.0621 0.4557 0.063 Uiso 0.697(11) calc A 2 GR . 
 H27E H 0.3089 0.0923 0.5428 0.063 Uiso 0.697(11) calc A 2 GR . 
 H27F H 0.4092 0.0365 0.5373 0.063 Uiso 0.697(11) calc A 2 GR . 
 C28A C 0.7388(4) 0.1928(5) 0.5681(4) 0.0522(19) Uani 0.697(11) d A 2 D U 
 H28D H 0.7633 0.1412 0.5685 0.078 Uiso 0.697(11) calc A 2 GR . 
 H28E H 0.7410 0.2113 0.6243 0.078 Uiso 0.697(11) calc A 2 GR . 
 H28F H 0.7870 0.2228 0.5366 0.078 Uiso 0.697(11) calc A 2 GR . 
 C29A C 0.4382(8) 0.3371(5) 0.4125(8) 0.051(2) Uani 0.697(11) d A 2 D U 
 H29D H 0.394(5) 0.337(3) 0.379(4) 0.076 Uiso 0.697(11) d A 2 R . 
 H29E H 0.494(5) 0.366(3) 0.406(4) 0.076 Uiso 0.697(11) d A 2 R . 
 C30 C 0.2811(5) 0.4417(9) 0.7299(5) 0.0302(17) Uani 0.686(19) d B 1 D U 
 C31 C 0.2955(7) 0.4188(7) 0.8112(5) 0.0373(16) Uani 0.686(19) d B 1 D U 
 C32 C 0.3969(7) 0.4328(6) 0.8541(5) 0.0402(18) Uani 0.686(19) d B 1 D U 
 H32 H 0.4083 0.4174 0.9095 0.048 Uiso 0.686(19) calc B 1 R . 
 C33 C 0.4800(6) 0.4681(5) 0.8186(6) 0.0347(17) Uani 0.686(19) d B 1 D U 
 C34 C 0.4635(6) 0.4875(5) 0.7367(6) 0.0326(15) Uani 0.686(19) d B 1 D U 
 H34 H 0.5220 0.5097 0.7109 0.039 Uiso 0.686(19) calc B 1 R . 
 C35 C 0.3650(6) 0.4758(6) 0.6909(5) 0.0283(15) Uani 0.686(19) d B 1 D U 
 C36 C 0.2075(9) 0.3784(7) 0.8518(8) 0.049(2) Uani 0.686(19) d B 1 D U 
 H36A H 0.1573 0.3551 0.8100 0.074 Uiso 0.686(19) calc B 1 GR . 
 H36B H 0.1671 0.4134 0.8836 0.074 Uiso 0.686(19) calc B 1 GR . 
 H36C H 0.2407 0.3404 0.8883 0.074 Uiso 0.686(19) calc B 1 GR . 
 C37 C 0.5882(6) 0.4808(5) 0.8674(6) 0.047(2) Uani 0.686(19) d B 1 D U 
 H37A H 0.6363 0.4384 0.8608 0.070 Uiso 0.686(19) calc B 1 GR . 
 H37B H 0.5758 0.4867 0.9254 0.070 Uiso 0.686(19) calc B 1 GR . 
 H37C H 0.6224 0.5257 0.8477 0.070 Uiso 0.686(19) calc B 1 GR . 
 C38 C 0.3531(10) 0.4960(6) 0.6027(5) 0.0310(18) Uani 0.686(19) d B 1 D U 
 H38A H 0.2857 0.5245 0.5911 0.047 Uiso 0.686(19) calc B 1 GR . 
 H38B H 0.3499 0.4510 0.5694 0.047 Uiso 0.686(19) calc B 1 GR . 
 H38C H 0.4158 0.5260 0.5894 0.047 Uiso 0.686(19) calc B 1 GR . 
 C30A C 0.2719(12) 0.446(2) 0.7410(12) 0.033(3) Uani 0.314(19) d B 2 D U 
 C31A C 0.2717(15) 0.4187(17) 0.8206(12) 0.037(2) Uani 0.314(19) d B 2 D U 
 C32A C 0.3707(15) 0.4262(14) 0.8684(11) 0.040(3) Uani 0.314(19) d B 2 D U 
 H32A H 0.3746 0.4083 0.9231 0.048 Uiso 0.314(19) calc B 2 R . 
 C33A C 0.4626(14) 0.4578(12) 0.8410(11) 0.038(3) Uani 0.314(19) d B 2 D U 
 C34A C 0.4562(14) 0.4863(12) 0.7625(11) 0.035(3) Uani 0.314(19) d B 2 D U 
 H34A H 0.5178 0.5111 0.7439 0.042 Uiso 0.314(19) calc B 2 R . 
 C35A C 0.3621(15) 0.4797(15) 0.7100(11) 0.031(3) Uani 0.314(19) d B 2 D U 
 C36A C 0.1700(18) 0.3852(14) 0.8501(16) 0.045(5) Uani 0.314(19) d B 2 D U 
 H36D H 0.1075 0.4174 0.8351 0.068 Uiso 0.314(19) calc B 2 GR . 
 H36E H 0.1789 0.3796 0.9097 0.068 Uiso 0.314(19) calc B 2 GR . 
 H36F H 0.1574 0.3366 0.8246 0.068 Uiso 0.314(19) calc B 2 GR . 
 C37A C 0.5692(16) 0.4658(14) 0.8939(13) 0.060(5) Uani 0.314(19) d B 2 D U 
 H37D H 0.6299 0.4703 0.8589 0.090 Uiso 0.314(19) calc B 2 GR . 
 H37E H 0.5803 0.4223 0.9291 0.090 Uiso 0.314(19) calc B 2 GR . 
 H37F H 0.5660 0.5102 0.9280 0.090 Uiso 0.314(19) calc B 2 GR . 
 C38A C 0.359(2) 0.5070(15) 0.6243(12) 0.044(5) Uani 0.314(19) d B 2 D U 
 H38D H 0.3208 0.5547 0.6202 0.067 Uiso 0.314(19) calc B 2 GR . 
 H38E H 0.3198 0.4712 0.5878 0.067 Uiso 0.314(19) calc B 2 GR . 
 H38F H 0.4335 0.5131 0.6083 0.067 Uiso 0.314(19) calc B 2 GR . 
 C39 C 0.2024(3) 0.1837(2) 0.7148(2) 0.0628(11) Uani 1 d . . . . 
 H39A H 0.2214 0.2202 0.7577 0.094 Uiso 1 calc C . GR . 
 H39B H 0.2693 0.1645 0.6937 0.094 Uiso 1 calc . . GR . 
 H39C H 0.1619 0.1429 0.7376 0.094 Uiso 1 calc . . GR . 
 C40 C 0.0010(3) 0.2545(2) 0.6851(2) 0.0489(9) Uani 1 d . . . . 
 H40A H -0.0537 0.2764 0.6455 0.073 Uiso 1 calc C . GR . 
 H40B H 0.0231 0.2910 0.7274 0.073 Uiso 1 calc . . GR . 
 H40C H -0.0304 0.2112 0.7105 0.073 Uiso 1 calc . . GR . 
 C41 C 0.0617(3) 0.14889(18) 0.5744(2) 0.0534(9) Uani 1 d . . . . 
 H41A H 0.1204 0.1222 0.5498 0.080 Uiso 1 calc C . GR . 
 H41B H 0.0088 0.1670 0.5311 0.080 Uiso 1 calc . . GR . 
 H41C H 0.0251 0.1155 0.6105 0.080 Uiso 1 calc . . GR . 
 H H 0.233(3) 0.371(3) 0.513(3) 0.080(13) Uiso 0.877(3) d C 1 . . 
 Cl2 Cl 0.2718(5) 0.4111(3) 0.4753(4) 0.035(2) Uani 0.123(3) d C 2 . . 
 
loop_ 
  _atom_site_aniso_label 
  _atom_site_aniso_U_11 
  _atom_site_aniso_U_22 
  _atom_site_aniso_U_33 
  _atom_site_aniso_U_23 
  _atom_site_aniso_U_13 
  _atom_site_aniso_U_12 
 Co1 0.0225(2) 0.0268(2) 0.0226(2) 0.00021(16) -0.00569(15) 0.00229(16) 
 Cl1 0.0237(4) 0.0365(4) 0.0316(4) -0.0037(3) -0.0093(3) 0.0013(3) 
 P1 0.0242(4) 0.0325(4) 0.0322(4) 0.0031(3) -0.0049(3) -0.0005(3) 
 N2 0.0206(12) 0.0262(12) 0.0236(12) -0.0003(10) -0.0051(10) 0.0028(9) 
 N1 0.0182(12) 0.0296(12) 0.0249(12) 0.0009(10) -0.0030(10) 0.0017(9) 
 N3 0.0291(13) 0.0290(13) 0.0283(13) 0.0007(10) 0.0022(11) 0.0052(10) 
 N4 0.0377(14) 0.0276(13) 0.0249(13) -0.0006(10) 0.0002(11) -0.0033(11) 
 C1 0.0203(14) 0.0249(14) 0.0246(15) 0.0041(11) -0.0060(12) -0.0019(11) 
 C2 0.0232(15) 0.0306(15) 0.0263(15) 0.0015(12) -0.0011(12) -0.0013(12) 
 C3 0.0287(17) 0.0461(18) 0.0329(17) -0.0037(14) 0.0020(14) 0.0056(14) 
 C4 0.0389(19) 0.053(2) 0.0294(17) -0.0094(14) 0.0052(14) 0.0068(15) 
 C5 0.0357(18) 0.0448(18) 0.0240(16) -0.0044(13) -0.0034(13) -0.0009(14) 
 C6 0.0292(16) 0.0337(16) 0.0272(16) 0.0010(13) -0.0048(13) 0.0010(13) 
 C7 0.0228(15) 0.0280(15) 0.0228(15) 0.0024(11) -0.0011(12) -0.0002(11) 
 C8 0.0242(15) 0.0288(15) 0.0256(15) -0.0002(12) -0.0008(12) 0.0043(11) 
 C9 0.0276(16) 0.0434(18) 0.0250(16) -0.0019(13) -0.0099(13) 0.0049(13) 
 C10 0.0261(16) 0.054(2) 0.0308(17) -0.0006(15) -0.0078(13) 0.0119(14) 
 C11 0.0291(17) 0.0434(18) 0.0336(17) 0.0018(14) -0.0015(13) 0.0185(14) 
 C12 0.0321(16) 0.0323(16) 0.0228(15) 0.0031(12) -0.0022(12) 0.0076(13) 
 C13 0.0260(15) 0.0265(15) 0.0233(15) 0.0028(11) -0.0016(12) 0.0030(11) 
 C14 0.0372(18) 0.0271(16) 0.0336(17) 0.0031(13) 0.0098(14) 0.0010(13) 
 C15 0.0396(19) 0.0351(18) 0.048(2) 0.0038(15) 0.0148(15) 0.0028(14) 
 C16 0.054(2) 0.0364(19) 0.063(2) -0.0052(17) 0.027(2) 0.0059(16) 
 C17 0.072(3) 0.040(2) 0.055(2) -0.0154(17) 0.028(2) -0.0037(18) 
 C18 0.059(2) 0.0394(19) 0.0365(19) -0.0092(15) 0.0120(16) -0.0097(16) 
 C19 0.0413(18) 0.0291(16) 0.0300(16) -0.0022(13) 0.0108(14) -0.0036(13) 
 C20 0.0306(16) 0.0290(15) 0.0222(15) 0.0025(12) 0.0001(12) -0.0014(12) 
 C21 0.019(4) 0.043(5) 0.031(5) -0.009(4) -0.003(4) -0.001(4) 
 C22 0.022(4) 0.048(5) 0.028(4) -0.006(4) -0.005(4) 0.010(4) 
 C23 0.023(5) 0.057(5) 0.036(4) -0.010(4) -0.005(4) 0.009(4) 
 C24 0.025(4) 0.062(6) 0.038(4) -0.014(4) -0.004(4) 0.004(4) 
 C25 0.023(4) 0.049(6) 0.038(5) -0.002(5) -0.006(4) 0.002(5) 
 C26 0.022(4) 0.046(5) 0.036(5) -0.002(4) -0.002(4) -0.001(4) 
 C27 0.035(10) 0.032(6) 0.051(8) 0.010(6) -0.011(10) 0.009(7) 
 C28 0.027(7) 0.112(11) 0.073(9) -0.024(9) -0.018(6) 0.016(8) 
 C29 0.036(9) 0.046(10) 0.052(9) -0.002(8) -0.009(7) -0.014(8) 
 C21A 0.019(2) 0.043(4) 0.026(3) -0.004(3) -0.001(2) 0.006(2) 
 C22A 0.021(3) 0.045(3) 0.029(2) -0.007(2) -0.001(3) 0.006(2) 
 C23A 0.021(3) 0.052(4) 0.033(3) -0.003(3) -0.003(2) 0.009(3) 
 C24A 0.021(2) 0.051(4) 0.029(3) -0.007(3) -0.003(2) 0.009(2) 
 C25A 0.021(2) 0.051(4) 0.038(3) -0.006(3) -0.002(2) 0.001(2) 
 C26A 0.017(2) 0.042(4) 0.035(3) -0.003(3) -0.005(2) 0.005(2) 
 C27A 0.028(5) 0.052(4) 0.043(3) 0.007(3) -0.012(5) 0.014(4) 
 C28A 0.022(3) 0.083(5) 0.050(4) -0.019(3) -0.006(2) 0.011(3) 
 C29A 0.033(5) 0.045(4) 0.072(5) 0.023(4) -0.012(4) -0.012(4) 
 C30 0.043(3) 0.024(3) 0.022(3) -0.011(3) -0.002(2) 0.002(2) 
 C31 0.049(3) 0.035(2) 0.028(3) -0.010(2) 0.004(3) -0.002(3) 
 C32 0.057(4) 0.035(3) 0.027(3) -0.001(3) -0.004(3) 0.002(3) 
 C33 0.050(3) 0.022(3) 0.030(4) -0.007(3) -0.009(3) 0.003(2) 
 C34 0.042(3) 0.026(2) 0.028(3) -0.008(3) -0.002(3) 0.001(2) 
 C35 0.034(2) 0.024(2) 0.026(4) -0.009(3) -0.003(2) 0.0008(19) 
 C36 0.052(5) 0.064(5) 0.032(3) 0.008(3) 0.003(4) 0.001(4) 
 C37 0.053(4) 0.036(4) 0.048(5) -0.006(3) -0.021(3) 0.011(3) 
 C38 0.035(3) 0.030(4) 0.027(3) -0.001(3) -0.005(3) -0.009(3) 
 C30A 0.042(4) 0.027(4) 0.028(5) -0.008(4) -0.005(4) 0.001(4) 
 C31A 0.050(5) 0.035(4) 0.026(4) -0.006(4) -0.005(4) 0.001(4) 
 C32A 0.055(5) 0.035(4) 0.030(5) -0.008(4) -0.002(5) 0.003(5) 
 C33A 0.051(5) 0.031(5) 0.030(5) -0.003(4) -0.008(5) 0.005(4) 
 C34A 0.045(4) 0.026(4) 0.032(5) -0.008(5) -0.003(5) -0.001(3) 
 C35A 0.041(4) 0.023(4) 0.028(5) -0.004(5) -0.007(4) 0.005(4) 
 C36A 0.072(11) 0.039(7) 0.025(7) 0.001(5) 0.004(9) 0.002(9) 
 C37A 0.066(8) 0.045(9) 0.065(10) -0.017(7) -0.019(8) 0.001(7) 
 C38A 0.036(7) 0.042(8) 0.054(10) -0.001(8) -0.002(8) -0.005(6) 
 C39 0.044(2) 0.067(3) 0.074(3) 0.038(2) -0.0182(19) -0.0085(18) 
 C40 0.044(2) 0.062(2) 0.042(2) 0.0105(17) 0.0075(16) 0.0009(16) 
 C41 0.056(2) 0.045(2) 0.059(2) -0.0038(17) 0.0054(18) -0.0162(17) 
 Cl2 0.032(4) 0.039(4) 0.034(4) 0.001(3) -0.001(3) -0.003(3) 
 
_geom_special_details 
; 
 All esds (except the esd in the dihedral angle between two l.s. planes) 
 are estimated using the full covariance matrix.  The cell esds are taken 
 into account individually in the estimation of esds in distances, angles 
 and torsion angles; correlations between esds in cell parameters are only 
 used when they are defined by crystal symmetry.  An approximate (isotropic) 
 treatment of cell esds is used for estimating esds involving l.s. planes. 
; 
 
loop_ 
  _geom_bond_atom_site_label_1 
  _geom_bond_atom_site_label_2 
  _geom_bond_distance 
  _geom_bond_site_symmetry_2 
  _geom_bond_publ_flag 
 Co1 Cl1 2.3057(7) . ? 
 Co1 P1 2.2229(8) . ? 
 Co1 C1 1.922(3) . ? 
 Co1 C13 1.857(3) . ? 
 Co1 C20 1.919(3) . ? 
 Co1 H 1.40(5) . ? 
 Co1 Cl2 2.483(6) . ? 
 P1 C39 1.796(3) . ? 
 P1 C40 1.810(3) . ? 
 P1 C41 1.813(3) . ? 
 N2 C1 1.393(3) . ? 
 N2 C7 1.397(3) . ? 
 N2 C8 1.418(3) . ? 
 N1 C1 1.361(3) . ? 
 N1 C2 1.406(3) . ? 
 N1 C21 1.457(8) . ? 
 N1 C21A 1.443(4) . ? 
 N3 C12 1.424(3) . ? 
 N3 C14 1.395(3) . ? 
 N3 C20 1.388(3) . ? 
 N4 C19 1.402(4) . ? 
 N4 C20 1.368(3) . ? 
 N4 C30 1.452(5) . ? 
 N4 C30A 1.448(8) . ? 
 C2 C3 1.378(4) . ? 
 C2 C7 1.399(4) . ? 
 C3 H3 0.9500 . ? 
 C3 C4 1.381(4) . ? 
 C4 H4 0.9500 . ? 
 C4 C5 1.392(4) . ? 
 C5 H5 0.9500 . ? 
 C5 C6 1.376(4) . ? 
 C6 H6 0.9500 . ? 
 C6 C7 1.385(4) . ? 
 C8 C9 1.386(4) . ? 
 C8 C13 1.381(4) . ? 
 C9 H9 0.9500 . ? 
 C9 C10 1.391(4) . ? 
 C10 H10 0.9500 . ? 
 C10 C11 1.391(4) . ? 
 C11 H11 0.9500 . ? 
 C11 C12 1.378(4) . ? 
 C12 C13 1.384(4) . ? 
 C14 C15 1.391(4) . ? 
 C14 C19 1.384(4) . ? 
 C15 H15 0.9500 . ? 
 C15 C16 1.383(4) . ? 
 C16 H16 0.9500 . ? 
 C16 C17 1.379(5) . ? 
 C17 H17 0.9500 . ? 
 C17 C18 1.391(5) . ? 
 C18 H18 0.9500 . ? 
 C18 C19 1.385(4) . ? 
 C21 C22 1.392(9) . ? 
 C21 C26 1.405(9) . ? 
 C22 C23 1.405(9) . ? 
 C22 C27 1.497(9) . ? 
 C23 H23 0.9500 . ? 
 C23 C24 1.385(10) . ? 
 C24 C25 1.388(10) . ? 
 C24 C28 1.520(9) . ? 
 C25 H25 0.9500 . ? 
 C25 C26 1.397(9) . ? 
 C26 C29 1.497(10) . ? 
 C27 H27A 0.9800 . ? 
 C27 H27B 0.9800 . ? 
 C27 H27C 0.9800 . ? 
 C28 H28A 0.9800 . ? 
 C28 H28B 0.9800 . ? 
 C28 H28C 0.9800 . ? 
 C29 H29A 0.9800 . ? 
 C29 H29B 0.9800 . ? 
 C29 H29C 0.9800 . ? 
 C29 H29D 1.16(6) . ? 
 C29 H29E 0.97(6) . ? 
 C21A C22A 1.386(6) . ? 
 C21A C26A 1.395(6) . ? 
 C22A C23A 1.401(6) . ? 
 C22A C27A 1.498(7) . ? 
 C23A H23A 0.9500 . ? 
 C23A C24A 1.376(7) . ? 
 C24A C25A 1.387(7) . ? 
 C24A C28A 1.516(6) . ? 
 C25A H25A 0.9500 . ? 
 C25A C26A 1.394(6) . ? 
 C26A C29A 1.494(7) . ? 
 C27A H27D 0.9800 . ? 
 C27A H27E 0.9800 . ? 
 C27A H27F 0.9800 . ? 
 C28A H28D 0.9800 . ? 
 C28A H28E 0.9800 . ? 
 C28A H28F 0.9800 . ? 
 C29A H29D 0.74(6) . ? 
 C29A H29E 0.87(6) . ? 
 C30 C31 1.394(6) . ? 
 C30 C35 1.398(6) . ? 
 C31 C32 1.403(6) . ? 
 C31 C36 1.503(7) . ? 
 C32 H32 0.9500 . ? 
 C32 C33 1.371(7) . ? 
 C33 C34 1.388(6) . ? 
 C33 C37 1.514(6) . ? 
 C34 H34 0.9500 . ? 
 C34 C35 1.389(5) . ? 
 C35 C38 1.488(6) . ? 
 C36 H36A 0.9800 . ? 
 C36 H36B 0.9800 . ? 
 C36 H36C 0.9800 . ? 
 C37 H37A 0.9800 . ? 
 C37 H37B 0.9800 . ? 
 C37 H37C 0.9800 . ? 
 C38 H38A 0.9800 . ? 
 C38 H38B 0.9800 . ? 
 C38 H38C 0.9800 . ? 
 C30A C31A 1.393(8) . ? 
 C30A C35A 1.396(8) . ? 
 C31A C32A 1.401(9) . ? 
 C31A C36A 1.502(9) . ? 
 C32A H32A 0.9500 . ? 
 C32A C33A 1.372(9) . ? 
 C33A C34A 1.383(9) . ? 
 C33A C37A 1.519(9) . ? 
 C34A H34A 0.9500 . ? 
 C34A C35A 1.390(8) . ? 
 C35A C38A 1.487(9) . ? 
 C36A H36D 0.9800 . ? 
 C36A H36E 0.9800 . ? 
 C36A H36F 0.9800 . ? 
 C37A H37D 0.9800 . ? 
 C37A H37E 0.9800 . ? 
 C37A H37F 0.9800 . ? 
 C38A H38D 0.9800 . ? 
 C38A H38E 0.9800 . ? 
 C38A H38F 0.9800 . ? 
 C39 H39A 0.9800 . ? 
 C39 H39B 0.9800 . ? 
 C39 H39C 0.9800 . ? 
 C40 H40A 0.9800 . ? 
 C40 H40B 0.9800 . ? 
 C40 H40C 0.9800 . ? 
 C41 H41A 0.9800 . ? 
 C41 H41B 0.9800 . ? 
 C41 H41C 0.9800 . ? 
 Cl2 H 1.09(5) . ? 
 
loop_ 
  _geom_angle_atom_site_label_1 
  _geom_angle_atom_site_label_2 
  _geom_angle_atom_site_label_3 
  _geom_angle 
  _geom_angle_site_symmetry_1 
  _geom_angle_site_symmetry_3 
  _geom_angle_publ_flag 
 Cl1 Co1 H 92.0(16) . . ? 
 Cl1 Co1 Cl2 89.81(14) . . ? 
 P1 Co1 Cl1 93.39(3) . . ? 
 P1 Co1 H 174.0(17) . . ? 
 P1 Co1 Cl2 176.79(14) . . ? 
 C1 Co1 Cl1 99.23(8) . . ? 
 C1 Co1 P1 96.24(8) . . ? 
 C1 Co1 H 85.3(17) . . ? 
 C1 Co1 Cl2 83.24(16) . . ? 
 C13 Co1 Cl1 177.52(8) . . ? 
 C13 Co1 P1 89.07(8) . . ? 
 C13 Co1 C1 80.77(11) . . ? 
 C13 Co1 C20 80.76(11) . . ? 
 C13 Co1 H 85.5(16) . . ? 
 C13 Co1 Cl2 87.73(16) . . ? 
 C20 Co1 Cl1 98.77(8) . . ? 
 C20 Co1 P1 93.95(8) . . ? 
 C20 Co1 C1 158.71(11) . . ? 
 C20 Co1 H 82.8(17) . . ? 
 C20 Co1 Cl2 85.54(16) . . ? 
 Cl2 Co1 H 3.3(17) . . ? 
 C39 P1 Co1 117.53(12) . . ? 
 C39 P1 C40 101.57(17) . . ? 
 C39 P1 C41 103.65(18) . . ? 
 C40 P1 Co1 116.35(12) . . ? 
 C40 P1 C41 100.07(17) . . ? 
 C41 P1 Co1 115.20(12) . . ? 
 C1 N2 C7 111.9(2) . . ? 
 C1 N2 C8 114.5(2) . . ? 
 C7 N2 C8 132.9(2) . . ? 
 C1 N1 C2 111.5(2) . . ? 
 C1 N1 C21 126(2) . . ? 
 C1 N1 C21A 125.9(9) . . ? 
 C2 N1 C21 122(2) . . ? 
 C2 N1 C21A 122.0(9) . . ? 
 C21A N1 C21 8.6(9) . . ? 
 C14 N3 C12 133.4(2) . . ? 
 C20 N3 C12 114.5(2) . . ? 
 C20 N3 C14 112.1(2) . . ? 
 C19 N4 C30 123.0(6) . . ? 
 C19 N4 C30A 115.3(15) . . ? 
 C20 N4 C19 110.7(2) . . ? 
 C20 N4 C30 125.8(6) . . ? 
 C20 N4 C30A 134.0(15) . . ? 
 C30A N4 C30 9.2(16) . . ? 
 N2 C1 Co1 114.77(18) . . ? 
 N1 C1 Co1 140.64(19) . . ? 
 N1 C1 N2 104.4(2) . . ? 
 C3 C2 N1 131.5(2) . . ? 
 C3 C2 C7 121.6(3) . . ? 
 C7 C2 N1 106.9(2) . . ? 
 C2 C3 H3 121.5 . . ? 
 C2 C3 C4 116.9(3) . . ? 
 C4 C3 H3 121.5 . . ? 
 C3 C4 H4 119.2 . . ? 
 C3 C4 C5 121.6(3) . . ? 
 C5 C4 H4 119.2 . . ? 
 C4 C5 H5 119.2 . . ? 
 C6 C5 C4 121.6(3) . . ? 
 C6 C5 H5 119.2 . . ? 
 C5 C6 H6 121.4 . . ? 
 C5 C6 C7 117.1(3) . . ? 
 C7 C6 H6 121.4 . . ? 
 N2 C7 C2 105.3(2) . . ? 
 C6 C7 N2 133.6(2) . . ? 
 C6 C7 C2 121.1(3) . . ? 
 C9 C8 N2 129.1(2) . . ? 
 C13 C8 N2 109.1(2) . . ? 
 C13 C8 C9 121.8(2) . . ? 
 C8 C9 H9 121.4 . . ? 
 C8 C9 C10 117.2(3) . . ? 
 C10 C9 H9 121.4 . . ? 
 C9 C10 H10 118.7 . . ? 
 C11 C10 C9 122.6(3) . . ? 
 C11 C10 H10 118.7 . . ? 
 C10 C11 H11 121.2 . . ? 
 C12 C11 C10 117.6(3) . . ? 
 C12 C11 H11 121.2 . . ? 
 C11 C12 N3 129.3(3) . . ? 
 C11 C12 C13 121.8(3) . . ? 
 C13 C12 N3 108.9(2) . . ? 
 C8 C13 Co1 120.6(2) . . ? 
 C8 C13 C12 118.8(2) . . ? 
 C12 C13 Co1 120.6(2) . . ? 
 C15 C14 N3 133.5(3) . . ? 
 C19 C14 N3 105.2(2) . . ? 
 C19 C14 C15 121.2(3) . . ? 
 C14 C15 H15 121.6 . . ? 
 C16 C15 C14 116.8(3) . . ? 
 C16 C15 H15 121.6 . . ? 
 C15 C16 H16 119.0 . . ? 
 C17 C16 C15 122.0(3) . . ? 
 C17 C16 H16 119.0 . . ? 
 C16 C17 H17 119.3 . . ? 
 C16 C17 C18 121.4(3) . . ? 
 C18 C17 H17 119.3 . . ? 
 C17 C18 H18 121.6 . . ? 
 C19 C18 C17 116.7(3) . . ? 
 C19 C18 H18 121.6 . . ? 
 C14 C19 N4 107.7(2) . . ? 
 C14 C19 C18 121.9(3) . . ? 
 C18 C19 N4 130.4(3) . . ? 
 N3 C20 Co1 115.02(19) . . ? 
 N4 C20 Co1 140.7(2) . . ? 
 N4 C20 N3 104.3(2) . . ? 
 C22 C21 N1 117.5(10) . . ? 
 C22 C21 C26 121.1(9) . . ? 
 C26 C21 N1 121.3(11) . . ? 
 C21 C22 C23 117.3(11) . . ? 
 C21 C22 C27 121.5(12) . . ? 
 C23 C22 C27 121.2(12) . . ? 
 C22 C23 H23 118.6 . . ? 
 C24 C23 C22 122.8(11) . . ? 
 C24 C23 H23 118.6 . . ? 
 C23 C24 C25 118.6(10) . . ? 
 C23 C24 C28 121.4(12) . . ? 
 C25 C24 C28 120.1(12) . . ? 
 C24 C25 H25 119.7 . . ? 
 C24 C25 C26 120.7(11) . . ? 
 C26 C25 H25 119.7 . . ? 
 C21 C26 C29 116.7(12) . . ? 
 C25 C26 C21 119.3(11) . . ? 
 C25 C26 C29 123.8(12) . . ? 
 C26 C29 H29D 132(4) . . ? 
 C26 C29 H29E 147(4) . . ? 
 H29A C29 H29D 82.4 . . ? 
 H29A C29 H29E 83.0 . . ? 
 H29B C29 H29D 29.6 . . ? 
 H29B C29 H29E 94.1 . . ? 
 H29C C29 H29D 109.4 . . ? 
 H29C C29 H29E 38.3 . . ? 
 H29D C29 H29E 79(5) . . ? 
 C22A C21A N1 118.6(5) . . ? 
 C22A C21A C26A 123.9(4) . . ? 
 C26A C21A N1 117.5(5) . . ? 
 C21A C22A C23A 117.3(5) . . ? 
 C21A C22A C27A 121.8(5) . . ? 
 C23A C22A C27A 120.8(5) . . ? 
 C22A C23A H23A 119.5 . . ? 
 C24A C23A C22A 121.1(5) . . ? 
 C24A C23A H23A 119.5 . . ? 
 C23A C24A C25A 119.3(4) . . ? 
 C23A C24A C28A 119.5(5) . . ? 
 C25A C24A C28A 121.2(5) . . ? 
 C24A C25A H25A 118.7 . . ? 
 C24A C25A C26A 122.6(5) . . ? 
 C26A C25A H25A 118.7 . . ? 
 C21A C26A C29A 122.8(5) . . ? 
 C25A C26A C21A 115.7(5) . . ? 
 C25A C26A C29A 121.5(5) . . ? 
 C22A C27A H27D 109.5 . . ? 
 C22A C27A H27E 109.5 . . ? 
 C22A C27A H27F 109.5 . . ? 
 H27D C27A H27E 109.5 . . ? 
 H27D C27A H27F 109.5 . . ? 
 H27E C27A H27F 109.5 . . ? 
 C24A C28A H28D 109.5 . . ? 
 C24A C28A H28E 109.5 . . ? 
 C24A C28A H28F 109.5 . . ? 
 H28D C28A H28E 109.5 . . ? 
 H28D C28A H28F 109.5 . . ? 
 H28E C28A H28F 109.5 . . ? 
 C26A C29A H29D 122(5) . . ? 
 C26A C29A H29E 109(4) . . ? 
 H29D C29A H29E 116(6) . . ? 
 C31 C30 N4 118.9(6) . . ? 
 C31 C30 C35 121.7(5) . . ? 
 C35 C30 N4 119.0(6) . . ? 
 C30 C31 C32 117.8(5) . . ? 
 C30 C31 C36 121.8(7) . . ? 
 C32 C31 C36 120.4(6) . . ? 
 C31 C32 H32 118.9 . . ? 
 C33 C32 C31 122.1(5) . . ? 
 C33 C32 H32 118.9 . . ? 
 C32 C33 C34 118.2(5) . . ? 
 C32 C33 C37 119.8(6) . . ? 
 C34 C33 C37 121.9(6) . . ? 
 C33 C34 H34 118.7 . . ? 
 C33 C34 C35 122.5(5) . . ? 
 C35 C34 H34 118.7 . . ? 
 C30 C35 C38 122.3(6) . . ? 
 C34 C35 C30 117.5(5) . . ? 
 C34 C35 C38 120.1(6) . . ? 
 C31A C30A N4 117.8(12) . . ? 
 C31A C30A C35A 123.8(10) . . ? 
 C35A C30A N4 118.5(12) . . ? 
 C30A C31A C32A 115.1(11) . . ? 
 C30A C31A C36A 120.4(13) . . ? 
 C32A C31A C36A 124.4(13) . . ? 
 C31A C32A H32A 118.1 . . ? 
 C33A C32A C31A 123.8(13) . . ? 
 C33A C32A H32A 118.1 . . ? 
 C32A C33A C34A 118.2(12) . . ? 
 C32A C33A C37A 123.0(12) . . ? 
 C34A C33A C37A 118.7(12) . . ? 
 C33A C34A H34A 119.1 . . ? 
 C33A C34A C35A 121.8(12) . . ? 
 C35A C34A H34A 119.1 . . ? 
 C30A C35A C38A 121.8(14) . . ? 
 C34A C35A C30A 117.2(11) . . ? 
 C34A C35A C38A 121.0(13) . . ? 
 C31A C36A H36D 109.5 . . ? 
 C31A C36A H36E 109.5 . . ? 
 C31A C36A H36F 109.5 . . ? 
 H36D C36A H36E 109.5 . . ? 
 H36D C36A H36F 109.5 . . ? 
 H36E C36A H36F 109.5 . . ? 
 C33A C37A H37D 109.5 . . ? 
 C33A C37A H37E 109.5 . . ? 
 C33A C37A H37F 109.5 . . ? 
 H37D C37A H37E 109.5 . . ? 
 H37D C37A H37F 109.5 . . ? 
 H37E C37A H37F 109.5 . . ? 
 C35A C38A H38D 109.5 . . ? 
 C35A C38A H38E 109.5 . . ? 
 C35A C38A H38F 109.5 . . ? 
 H38D C38A H38E 109.5 . . ? 
 H38D C38A H38F 109.5 . . ? 
 H38E C38A H38F 109.5 . . ? 
 P1 C39 H39A 109.5 . . ? 
 P1 C39 H39B 109.5 . . ? 
 P1 C39 H39C 109.5 . . ? 
 H39A C39 H39B 109.5 . . ? 
 H39A C39 H39C 109.5 . . ? 
 H39B C39 H39C 109.5 . . ? 
 P1 C40 H40A 109.5 . . ? 
 P1 C40 H40B 109.5 . . ? 
 P1 C40 H40C 109.5 . . ? 
 H40A C40 H40B 109.5 . . ? 
 H40A C40 H40C 109.5 . . ? 
 H40B C40 H40C 109.5 . . ? 
 P1 C41 H41A 109.5 . . ? 
 P1 C41 H41B 109.5 . . ? 
 P1 C41 H41C 109.5 . . ? 
 H41A C41 H41B 109.5 . . ? 
 H41A C41 H41C 109.5 . . ? 
 H41B C41 H41C 109.5 . . ? 
 Co1 Cl2 H 4(2) . . ? 
 
loop_ 
  _geom_torsion_atom_site_label_1 
  _geom_torsion_atom_site_label_2 
  _geom_torsion_atom_site_label_3 
  _geom_torsion_atom_site_label_4 
  _geom_torsion 
  _geom_torsion_site_symmetry_1 
  _geom_torsion_site_symmetry_2 
  _geom_torsion_site_symmetry_3 
  _geom_torsion_site_symmetry_4 
  _geom_torsion_publ_flag 
 Cl1 Co1 P1 C39 2.62(16) . . . . ? 
 Cl1 Co1 P1 C40 123.32(13) . . . . ? 
 Cl1 Co1 P1 C41 -120.02(14) . . . . ? 
 Cl1 Co1 C1 N2 179.82(17) . . . . ? 
 Cl1 Co1 C1 N1 -6.8(3) . . . . ? 
 Cl1 Co1 C13 C8 95(2) . . . . ? 
 Cl1 Co1 C13 C12 -84(2) . . . . ? 
 Cl1 Co1 C20 N3 -178.91(18) . . . . ? 
 Cl1 Co1 C20 N4 0.6(3) . . . . ? 
 P1 Co1 C1 N2 85.34(18) . . . . ? 
 P1 Co1 C1 N1 -101.3(3) . . . . ? 
 P1 Co1 C13 C8 -91.4(2) . . . . ? 
 P1 Co1 C13 C12 89.3(2) . . . . ? 
 P1 Co1 C20 N3 -84.86(19) . . . . ? 
 P1 Co1 C20 N4 94.6(3) . . . . ? 
 N2 C8 C9 C10 -175.6(3) . . . . ? 
 N2 C8 C13 Co1 -6.0(3) . . . . ? 
 N2 C8 C13 C12 173.3(2) . . . . ? 
 N1 C2 C3 C4 -178.2(3) . . . . ? 
 N1 C2 C7 N2 -1.2(3) . . . . ? 
 N1 C2 C7 C6 178.5(2) . . . . ? 
 N1 C21 C22 C23 -179(3) . . . . ? 
 N1 C21 C22 C27 0(5) . . . . ? 
 N1 C21 C26 C25 177(3) . . . . ? 
 N1 C21 C26 C29 2(5) . . . . ? 
 N1 C21A C22A C23A -178.6(12) . . . . ? 
 N1 C21A C22A C27A 0(2) . . . . ? 
 N1 C21A C26A C25A 178.1(12) . . . . ? 
 N1 C21A C26A C29A 1(2) . . . . ? 
 N3 C12 C13 Co1 4.9(3) . . . . ? 
 N3 C12 C13 C8 -174.4(2) . . . . ? 
 N3 C14 C15 C16 -178.8(3) . . . . ? 
 N3 C14 C19 N4 1.3(3) . . . . ? 
 N3 C14 C19 C18 -179.9(3) . . . . ? 
 N4 C30 C31 C32 -171.0(11) . . . . ? 
 N4 C30 C31 C36 10.8(17) . . . . ? 
 N4 C30 C35 C34 171.4(10) . . . . ? 
 N4 C30 C35 C38 -11.5(15) . . . . ? 
 N4 C30A C31A C32A 179(3) . . . . ? 
 N4 C30A C31A C36A -2(4) . . . . ? 
 N4 C30A C35A C34A -180(2) . . . . ? 
 N4 C30A C35A C38A -1(4) . . . . ? 
 C1 Co1 P1 C39 102.30(18) . . . . ? 
 C1 Co1 P1 C40 -137.00(15) . . . . ? 
 C1 Co1 P1 C41 -20.34(15) . . . . ? 
 C1 Co1 C13 C8 5.0(2) . . . . ? 
 C1 Co1 C13 C12 -174.2(2) . . . . ? 
 C1 Co1 C20 N3 33.7(4) . . . . ? 
 C1 Co1 C20 N4 -146.9(3) . . . . ? 
 C1 N2 C7 C2 3.2(3) . . . . ? 
 C1 N2 C7 C6 -176.5(3) . . . . ? 
 C1 N2 C8 C9 -178.7(3) . . . . ? 
 C1 N2 C8 C13 3.4(3) . . . . ? 
 C1 N1 C2 C3 178.5(3) . . . . ? 
 C1 N1 C2 C7 -1.1(3) . . . . ? 
 C1 N1 C21 C22 98(3) . . . . ? 
 C1 N1 C21 C26 -85(4) . . . . ? 
 C1 N1 C21A C22A 105.2(13) . . . . ? 
 C1 N1 C21A C26A -77.0(15) . . . . ? 
 C2 N1 C1 Co1 -170.9(2) . . . . ? 
 C2 N1 C1 N2 3.0(3) . . . . ? 
 C2 N1 C21 C22 -81(4) . . . . ? 
 C2 N1 C21 C26 96(3) . . . . ? 
 C2 N1 C21A C22A -84.9(14) . . . . ? 
 C2 N1 C21A C26A 92.9(14) . . . . ? 
 C2 C3 C4 C5 -0.7(5) . . . . ? 
 C3 C2 C7 N2 179.1(3) . . . . ? 
 C3 C2 C7 C6 -1.1(4) . . . . ? 
 C3 C4 C5 C6 -0.3(5) . . . . ? 
 C4 C5 C6 C7 0.6(4) . . . . ? 
 C5 C6 C7 N2 179.8(3) . . . . ? 
 C5 C6 C7 C2 0.1(4) . . . . ? 
 C7 N2 C1 Co1 171.86(17) . . . . ? 
 C7 N2 C1 N1 -3.8(3) . . . . ? 
 C7 N2 C8 C9 11.9(5) . . . . ? 
 C7 N2 C8 C13 -166.0(3) . . . . ? 
 C7 C2 C3 C4 1.4(4) . . . . ? 
 C8 N2 C1 Co1 0.2(3) . . . . ? 
 C8 N2 C1 N1 -175.4(2) . . . . ? 
 C8 N2 C7 C2 172.8(3) . . . . ? 
 C8 N2 C7 C6 -7.0(5) . . . . ? 
 C8 C9 C10 C11 1.1(5) . . . . ? 
 C9 C8 C13 Co1 175.9(2) . . . . ? 
 C9 C8 C13 C12 -4.8(4) . . . . ? 
 C9 C10 C11 C12 -1.5(5) . . . . ? 
 C10 C11 C12 N3 177.2(3) . . . . ? 
 C10 C11 C12 C13 -1.4(4) . . . . ? 
 C11 C12 C13 Co1 -176.2(2) . . . . ? 
 C11 C12 C13 C8 4.5(4) . . . . ? 
 C12 N3 C14 C15 -0.2(5) . . . . ? 
 C12 N3 C14 C19 -178.1(3) . . . . ? 
 C12 N3 C20 Co1 -2.0(3) . . . . ? 
 C12 N3 C20 N4 178.4(2) . . . . ? 
 C13 Co1 P1 C39 -177.10(18) . . . . ? 
 C13 Co1 P1 C40 -56.39(15) . . . . ? 
 C13 Co1 P1 C41 60.27(16) . . . . ? 
 C13 Co1 C1 N2 -2.69(18) . . . . ? 
 C13 Co1 C1 N1 170.7(3) . . . . ? 
 C13 Co1 C20 N3 3.55(19) . . . . ? 
 C13 Co1 C20 N4 -177.0(3) . . . . ? 
 C13 C8 C9 C10 2.1(4) . . . . ? 
 C14 N3 C12 C11 -4.0(5) . . . . ? 
 C14 N3 C12 C13 174.8(3) . . . . ? 
 C14 N3 C20 Co1 -179.15(18) . . . . ? 
 C14 N3 C20 N4 1.2(3) . . . . ? 
 C14 C15 C16 C17 -0.2(5) . . . . ? 
 C15 C14 C19 N4 -176.9(3) . . . . ? 
 C15 C14 C19 C18 1.9(4) . . . . ? 
 C15 C16 C17 C18 1.0(5) . . . . ? 
 C16 C17 C18 C19 -0.3(5) . . . . ? 
 C17 C18 C19 N4 177.4(3) . . . . ? 
 C17 C18 C19 C14 -1.1(4) . . . . ? 
 C19 N4 C20 Co1 -179.8(2) . . . . ? 
 C19 N4 C20 N3 -0.3(3) . . . . ? 
 C19 N4 C30 C31 74.6(12) . . . . ? 
 C19 N4 C30 C35 -98.2(10) . . . . ? 
 C19 N4 C30A C31A 76(3) . . . . ? 
 C19 N4 C30A C35A -103(2) . . . . ? 
 C19 C14 C15 C16 -1.1(4) . . . . ? 
 C20 Co1 P1 C39 -96.43(18) . . . . ? 
 C20 Co1 P1 C40 24.28(15) . . . . ? 
 C20 Co1 P1 C41 140.94(16) . . . . ? 
 C20 Co1 C1 N2 -32.8(4) . . . . ? 
 C20 Co1 C1 N1 140.6(3) . . . . ? 
 C20 Co1 C13 C8 174.4(2) . . . . ? 
 C20 Co1 C13 C12 -4.8(2) . . . . ? 
 C20 N3 C12 C11 179.6(3) . . . . ? 
 C20 N3 C12 C13 -1.6(3) . . . . ? 
 C20 N3 C14 C15 176.3(3) . . . . ? 
 C20 N3 C14 C19 -1.6(3) . . . . ? 
 C20 N4 C19 C14 -0.6(3) . . . . ? 
 C20 N4 C19 C18 -179.3(3) . . . . ? 
 C20 N4 C30 C31 -114.4(10) . . . . ? 
 C20 N4 C30 C35 72.8(12) . . . . ? 
 C20 N4 C30A C31A -106(2) . . . . ? 
 C20 N4 C30A C35A 74(3) . . . . ? 
 C21 N1 C1 Co1 10.6(9) . . . . ? 
 C21 N1 C1 N2 -175.6(9) . . . . ? 
 C21 N1 C2 C3 -2.9(9) . . . . ? 
 C21 N1 C2 C7 177.5(9) . . . . ? 
 C21 N1 C21A C22A 10(18) . . . . ? 
 C21 N1 C21A C26A -172(21) . . . . ? 
 C21 C22 C23 C24 -1(3) . . . . ? 
 C22 C21 C26 C25 -6(5) . . . . ? 
 C22 C21 C26 C29 179(3) . . . . ? 
 C22 C23 C24 C25 -2(2) . . . . ? 
 C22 C23 C24 C28 177.5(17) . . . . ? 
 C23 C24 C25 C26 0(2) . . . . ? 
 C24 C25 C26 C21 4(3) . . . . ? 
 C24 C25 C26 C29 178.7(19) . . . . ? 
 C26 C21 C22 C23 5(5) . . . . ? 
 C26 C21 C22 C27 -176(3) . . . . ? 
 C27 C22 C23 C24 -180(2) . . . . ? 
 C28 C24 C25 C26 -179.1(15) . . . . ? 
 C21A N1 C1 Co1 0.0(6) . . . . ? 
 C21A N1 C1 N2 173.8(4) . . . . ? 
 C21A N1 C2 C3 7.3(6) . . . . ? 
 C21A N1 C2 C7 -172.3(4) . . . . ? 
 C21A N1 C21 C22 -171(23) . . . . ? 
 C21A N1 C21 C26 6(16) . . . . ? 
 C21A C22A C23A C24A -0.4(13) . . . . ? 
 C22A C21A C26A C25A -4.2(19) . . . . ? 
 C22A C21A C26A C29A 178.8(13) . . . . ? 
 C22A C23A C24A C25A -2.1(9) . . . . ? 
 C22A C23A C24A C28A 177.3(6) . . . . ? 
 C23A C24A C25A C26A 1.7(8) . . . . ? 
 C24A C25A C26A C21A 1.4(12) . . . . ? 
 C24A C25A C26A C29A 178.5(8) . . . . ? 
 C26A C21A C22A C23A 4(2) . . . . ? 
 C26A C21A C22A C27A -177.8(14) . . . . ? 
 C27A C22A C23A C24A -178.9(9) . . . . ? 
 C28A C24A C25A C26A -177.8(6) . . . . ? 
 C30 N4 C19 C14 171.6(5) . . . . ? 
 C30 N4 C19 C18 -7.0(6) . . . . ? 
 C30 N4 C20 Co1 8.2(7) . . . . ? 
 C30 N4 C20 N3 -172.3(6) . . . . ? 
 C30 N4 C30A C31A -136(13) . . . . ? 
 C30 N4 C30A C35A 45(9) . . . . ? 
 C30 C31 C32 C33 0.3(14) . . . . ? 
 C31 C30 C35 C34 -1.2(15) . . . . ? 
 C31 C30 C35 C38 175.9(11) . . . . ? 
 C31 C32 C33 C34 -2.6(13) . . . . ? 
 C31 C32 C33 C37 -179.2(9) . . . . ? 
 C32 C33 C34 C35 3.1(12) . . . . ? 
 C33 C34 C35 C30 -1.2(13) . . . . ? 
 C33 C34 C35 C38 -178.4(9) . . . . ? 
 C35 C30 C31 C32 1.7(16) . . . . ? 
 C35 C30 C31 C36 -176.5(12) . . . . ? 
 C36 C31 C32 C33 178.5(11) . . . . ? 
 C37 C33 C34 C35 179.6(8) . . . . ? 
 C30A N4 C19 C14 177.4(10) . . . . ? 
 C30A N4 C19 C18 -1.2(10) . . . . ? 
 C30A N4 C20 Co1 2.6(13) . . . . ? 
 C30A N4 C20 N3 -177.9(13) . . . . ? 
 C30A N4 C30 C31 40(11) . . . . ? 
 C30A N4 C30 C35 -133(12) . . . . ? 
 C30A C31A C32A C33A 0(3) . . . . ? 
 C31A C30A C35A C34A 0(4) . . . . ? 
 C31A C30A C35A C38A 179(3) . . . . ? 
 C31A C32A C33A C34A 2(3) . . . . ? 
 C31A C32A C33A C37A 180(2) . . . . ? 
 C32A C33A C34A C35A -4(3) . . . . ? 
 C33A C34A C35A C30A 3(3) . . . . ? 
 C33A C34A C35A C38A -176(2) . . . . ? 
 C35A C30A C31A C32A -2(4) . . . . ? 
 C35A C30A C31A C36A 178(3) . . . . ? 
 C36A C31A C32A C33A -179(3) . . . . ? 
 C37A C33A C34A C35A 179(2) . . . . ? 
 Cl2 Co1 P1 C39 -177(3) . . . . ? 
 Cl2 Co1 P1 C40 -56(3) . . . . ? 
 Cl2 Co1 P1 C41 60(3) . . . . ? 
 Cl2 Co1 C1 N2 -91.5(2) . . . . ? 
 Cl2 Co1 C1 N1 81.9(3) . . . . ? 
 Cl2 Co1 C13 C8 88.6(3) . . . . ? 
 Cl2 Co1 C13 C12 -90.7(3) . . . . ? 
 Cl2 Co1 C20 N3 92.0(2) . . . . ? 
 Cl2 Co1 C20 N4 -88.5(3) . . . . ? 
 
_iucr_refine_instructions_details 
; 
TITL cm07w in P21/n #14 
REM reset to P21/n #14 
CELL 0.71073 12.2774 18.0919 16.3936 90 94.5253 90 
ZERR 4 0.0005 0.0007 0.0007 0 0.0017 0 
LATT 1 
SYMM 0.5-X,0.5+Y,0.5-Z 
SFAC C H Cl Co N P 
UNIT 164 168.72 4.49 4 16 4 
SADI 0.01 N1 C21 N1 C21A 
SADI 0.01 N4 C30 N4 C30A 
SIMU 0.01 0.02 1.7 C21 > C29A 
SIMU 0.01 0.02 1.7 C30 > C38A 
 
L.S. 20 
PLAN  10 
SIZE 0.049 0.141 0.146 
TEMP -173 
BOND 
MORE -1 
BOND $H 
CONF 
fmap 2 53 
acta 52 
REM <olex2.extras> 
REM <HklSrc "%.\\cm07wsa.hkl"> 
REM </olex2.extras> 
 
WGHT    0.039700    2.757500 
FVAR       0.08966   0.30293   0.68601   0.87746 
CO1   4    0.195921    0.313218    0.560636    11.00000    0.02250    0.02679 = 
         0.02257    0.00021   -0.00569    0.00229 
CL1   3    0.364866    0.299339    0.630932    11.00000    0.02373    0.03654 = 
         0.03157   -0.00367   -0.00926    0.00132 
P1    6    0.119028    0.226526    0.633148    11.00000    0.02423    0.03247 = 
         0.03221    0.00305   -0.00493   -0.00050 
N2    5    0.127574    0.247460    0.410194    11.00000    0.02060    0.02624 = 
         0.02357   -0.00034   -0.00512    0.00279 
N1    5    0.297044    0.213237    0.433168    11.00000    0.01819    0.02958 = 
         0.02488    0.00089   -0.00303    0.00174 
N3    5    0.036716    0.416430    0.597631    11.00000    0.02915    0.02897 = 
         0.02826    0.00066    0.00215    0.00517 
N4    5    0.172666    0.438008    0.687812    11.00000    0.03775    0.02761 = 
         0.02485   -0.00058    0.00019   -0.00330 
C1    1    0.217334    0.251972    0.467460    11.00000    0.02026    0.02487 = 
         0.02464    0.00413   -0.00603   -0.00188 
C2    1    0.261512    0.187813    0.354514    11.00000    0.02318    0.03057 = 
         0.02632    0.00148   -0.00108   -0.00135 
C3    1    0.314344    0.148343    0.297545    11.00000    0.02865    0.04613 = 
         0.03293   -0.00372    0.00195    0.00564 
AFIX  43 
H3    2    0.387542    0.131929    0.308475    11.00000   -1.20000 
AFIX   0 
C4    1    0.255978    0.133744    0.223828    11.00000    0.03893    0.05295 = 
         0.02937   -0.00937    0.00520    0.00676 
AFIX  43 
H4    2    0.290123    0.107107    0.182901    11.00000   -1.20000 
AFIX   0 
C5    1    0.148346    0.157094    0.208005    11.00000    0.03566    0.04482 = 
         0.02401   -0.00443   -0.00344   -0.00094 
AFIX  43 
H5    2    0.110944    0.146229    0.156453    11.00000   -1.20000 
AFIX   0 
C6    1    0.094851    0.195529    0.265242    11.00000    0.02916    0.03372 = 
         0.02715    0.00098   -0.00483    0.00101 
AFIX  43 
H6    2    0.021180    0.211017    0.254497    11.00000   -1.20000 
AFIX   0 
C7    1    0.152985    0.210674    0.339184    11.00000    0.02284    0.02801 = 
         0.02277    0.00236   -0.00110   -0.00018 
C8    1    0.035578    0.289161    0.430285    11.00000    0.02416    0.02876 = 
         0.02559   -0.00018   -0.00079    0.00427 
C9    1   -0.066165    0.295530    0.387815    11.00000    0.02760    0.04343 = 
         0.02499   -0.00189   -0.00988    0.00486 
AFIX  43 
H9    2   -0.084768    0.267511    0.339715    11.00000   -1.20000 
AFIX   0 
C10   1   -0.139931    0.344664    0.418548    11.00000    0.02605    0.05423 = 
         0.03078   -0.00058   -0.00780    0.01187 
AFIX  43 
H10   2   -0.210634    0.349260    0.391000    11.00000   -1.20000 
AFIX   0 
C11   1   -0.114243    0.387333    0.488031    11.00000    0.02910    0.04340 = 
         0.03362    0.00180   -0.00151    0.01849 
AFIX  43 
H11   2   -0.165290    0.421385    0.507229    11.00000   -1.20000 
AFIX   0 
C12   1   -0.012056    0.378402    0.527993    11.00000    0.03205    0.03226 = 
         0.02285    0.00311   -0.00216    0.00763 
C13   1    0.062207    0.327884    0.501694    11.00000    0.02599    0.02652 = 
         0.02332    0.00278   -0.00160    0.00301 
C14   1    0.003061    0.475280    0.644523    11.00000    0.03719    0.02713 = 
         0.03355    0.00311    0.00984    0.00097 
C15   1   -0.090458    0.518943    0.640793    11.00000    0.03962    0.03514 = 
         0.04752    0.00377    0.01476    0.00284 
AFIX  43 
H15   2   -0.149279    0.511003    0.600536    11.00000   -1.20000 
AFIX   0 
C16   1   -0.093654    0.574493    0.698550    11.00000    0.05449    0.03643 = 
         0.06330   -0.00517    0.02713    0.00588 
AFIX  43 
H16   2   -0.156187    0.605497    0.697658    11.00000   -1.20000 
AFIX   0 
C17   1   -0.008803    0.586216    0.757382    11.00000    0.07174    0.04004 = 
         0.05492   -0.01537    0.02848   -0.00368 
AFIX  43 
H17   2   -0.014773    0.624486    0.796457    11.00000   -1.20000 
AFIX   0 
C18   1    0.085350    0.543181    0.760717    11.00000    0.05898    0.03938 = 
         0.03646   -0.00923    0.01197   -0.00972 
AFIX  43 
H18   2    0.144125    0.551234    0.800983    11.00000   -1.20000 
AFIX   0 
C19   1    0.089162    0.488036    0.702451    11.00000    0.04132    0.02906 = 
         0.03002   -0.00223    0.01085   -0.00359 
C20   1    0.141763    0.393260    0.622795    11.00000    0.03060    0.02903 = 
         0.02221    0.00252    0.00008   -0.00135 
PART 1 
C21   1    0.405641    0.197014    0.471219    21.00000    0.01891    0.04314 = 
         0.03115   -0.00908   -0.00327   -0.00061 
C22   1    0.422199    0.127984    0.507586    21.00000    0.02170    0.04758 = 
         0.02759   -0.00604   -0.00523    0.01013 
C23   1    0.526373    0.113228    0.545775    21.00000    0.02304    0.05715 = 
         0.03566   -0.01026   -0.00453    0.00948 
AFIX  43 
H23   2    0.539125    0.066596    0.571410    21.00000   -1.20000 
AFIX   0 
C24   1    0.611335    0.163753    0.547669    21.00000    0.02465    0.06168 = 
         0.03760   -0.01448   -0.00355    0.00356 
C25   1    0.593524    0.231108    0.508275    21.00000    0.02263    0.04945 = 
         0.03781   -0.00186   -0.00560    0.00155 
AFIX  43 
H25   2    0.650943    0.266347    0.508831    21.00000   -1.20000 
AFIX   0 
C26   1    0.491969    0.247579    0.467813    21.00000    0.02228    0.04558 = 
         0.03590   -0.00161   -0.00215   -0.00057 
C27   1    0.332265    0.072052    0.507207    21.00000    0.03491    0.03207 = 
         0.05117    0.01030   -0.01071    0.00929 
AFIX 137 
H27A  2    0.305360    0.061148    0.450614    21.00000   -1.50000 
H27B  2    0.272416    0.091781    0.536882    21.00000   -1.50000 
H27C  2    0.360160    0.026620    0.533876    21.00000   -1.50000 
AFIX   0 
C28   1    0.721680    0.147051    0.592508    21.00000    0.02699    0.11247 = 
         0.07303   -0.02398   -0.01761    0.01641 
AFIX 137 
H28A  2    0.723779    0.095230    0.609965    21.00000   -1.50000 
H28B  2    0.732784    0.179156    0.640594    21.00000   -1.50000 
H28C  2    0.779630    0.156000    0.555879    21.00000   -1.50000 
AFIX   0 
C29   1    0.465712    0.319455    0.425486    21.00000    0.03560    0.04593 = 
         0.05229   -0.00175   -0.00887   -0.01382 
AFIX 137 
H29A  2    0.428279    0.352026    0.462011    21.00000   -1.50000 
H29B  2    0.418185    0.310377    0.375623    21.00000   -1.50000 
H29C  2    0.533483    0.343014    0.411117    21.00000   -1.50000 
AFIX   0 
SAME 0.01 0.04 C21 > C29 
PART 0 
PART 2 
C21A  1    0.409594    0.207361    0.465306   -21.00000    0.01857    0.04282 = 
         0.02552   -0.00392   -0.00114    0.00612 
C22A  1    0.444587    0.141798    0.502516   -21.00000    0.02124    0.04531 = 
         0.02892   -0.00672   -0.00140    0.00607 
C23A  1    0.553563    0.138250    0.534790   -21.00000    0.02121    0.05217 = 
         0.03322   -0.00275   -0.00252    0.00941 
AFIX  43 
H23A  2    0.580045    0.094245    0.561028   -21.00000   -1.20000 
AFIX   0 
C24A  1    0.622875    0.197489    0.529096   -21.00000    0.02108    0.05107 = 
         0.02932   -0.00716   -0.00314    0.00869 
C25A  1    0.584908    0.260714    0.488341   -21.00000    0.02130    0.05112 = 
         0.03846   -0.00579   -0.00175    0.00055 
AFIX  43 
H25A  2    0.633860    0.300848    0.483437   -21.00000   -1.20000 
AFIX   0 
C26A  1    0.477701    0.267695    0.454277   -21.00000    0.01745    0.04245 = 
         0.03464   -0.00284   -0.00472    0.00504 
C27A  1    0.368932    0.077624    0.510270   -21.00000    0.02844    0.05177 = 
         0.04302    0.00748   -0.01168    0.01447 
AFIX 137 
H27D  2    0.339215    0.062095    0.455715   -21.00000   -1.50000 
H27E  2    0.308941    0.092335    0.542837   -21.00000   -1.50000 
H27F  2    0.409163    0.036475    0.537328   -21.00000   -1.50000 
AFIX   0 
C28A  1    0.738778    0.192814    0.568066   -21.00000    0.02199    0.08347 = 
         0.04959   -0.01927   -0.00646    0.01145 
AFIX 137 
H28D  2    0.763262    0.141249    0.568478   -21.00000   -1.50000 
H28E  2    0.741007    0.211341    0.624347   -21.00000   -1.50000 
H28F  2    0.787014    0.222829    0.536573   -21.00000   -1.50000 
AFIX   0 
C29A  1    0.438172    0.337134    0.412476   -21.00000    0.03343    0.04468 = 
         0.07179    0.02294   -0.01208   -0.01241 
H29D  2    0.394349    0.337314    0.379055   -21.00000   -1.50000 
H29E  2    0.493773    0.365990    0.405814   -21.00000   -1.50000 
PART 0 
PART 1 
C30   1    0.281075    0.441731    0.729882    31.00000    0.04331    0.02429 = 
         0.02219   -0.01059   -0.00165    0.00239 
C31   1    0.295517    0.418831    0.811204    31.00000    0.04866    0.03546 = 
         0.02793   -0.00971    0.00379   -0.00197 
C32   1    0.396898    0.432825    0.854069    31.00000    0.05709    0.03498 = 
         0.02747   -0.00126   -0.00373    0.00181 
AFIX  43 
H32   2    0.408330    0.417384    0.909471    31.00000   -1.20000 
AFIX   0 
C33   1    0.479960    0.468059    0.818563    31.00000    0.04965    0.02217 = 
         0.03041   -0.00707   -0.00890    0.00264 
C34   1    0.463536    0.487532    0.736653    31.00000    0.04237    0.02621 = 
         0.02844   -0.00780   -0.00232    0.00088 
AFIX  43 
H34   2    0.521971    0.509744    0.710882    31.00000   -1.20000 
AFIX   0 
C35   1    0.364956    0.475807    0.690867    31.00000    0.03392    0.02397 = 
         0.02613   -0.00868   -0.00319    0.00078 
C36   1    0.207502    0.378424    0.851814    31.00000    0.05178    0.06409 = 
         0.03174    0.00821    0.00255    0.00107 
AFIX 137 
H36A  2    0.157339    0.355132    0.809987    31.00000   -1.50000 
H36B  2    0.167062    0.413439    0.883611    31.00000   -1.50000 
H36C  2    0.240714    0.340352    0.888322    31.00000   -1.50000 
AFIX   0 
C37   1    0.588159    0.480834    0.867433    31.00000    0.05294    0.03584 = 
         0.04824   -0.00645   -0.02087    0.01087 
AFIX 137 
H37A  2    0.636290    0.438405    0.860804    31.00000   -1.50000 
H37B  2    0.575807    0.486711    0.925409    31.00000   -1.50000 
H37C  2    0.622418    0.525657    0.847719    31.00000   -1.50000 
AFIX   0 
C38   1    0.353070    0.496041    0.602660    31.00000    0.03493    0.03032 = 
         0.02668   -0.00114   -0.00453   -0.00911 
AFIX 137 
H38A  2    0.285700    0.524506    0.591132    31.00000   -1.50000 
H38B  2    0.349856    0.450992    0.569362    31.00000   -1.50000 
H38C  2    0.415824    0.525955    0.589377    31.00000   -1.50000 
AFIX   0 
SAME 0.01 0.04 C30 > C38 
PART 0 
PART 2 
C30A  1    0.271948    0.445700    0.741011   -31.00000    0.04231    0.02682 = 
         0.02802   -0.00825   -0.00505    0.00090 
C31A  1    0.271670    0.418744    0.820570   -31.00000    0.05049    0.03472 = 
         0.02593   -0.00611   -0.00488    0.00150 
C32A  1    0.370749    0.426180    0.868434   -31.00000    0.05518    0.03491 = 
         0.02977   -0.00760   -0.00204    0.00274 
AFIX  43 
H32A  2    0.374553    0.408289    0.923066   -31.00000   -1.20000 
AFIX   0 
C33A  1    0.462595    0.457812    0.840950   -31.00000    0.05103    0.03051 = 
         0.02999   -0.00330   -0.00788    0.00525 
C34A  1    0.456179    0.486325    0.762460   -31.00000    0.04483    0.02645 = 
         0.03192   -0.00759   -0.00313   -0.00096 
AFIX  43 
H34A  2    0.517800    0.511095    0.743866   -31.00000   -1.20000 
AFIX   0 
C35A  1    0.362053    0.479742    0.710018   -31.00000    0.04061    0.02344 = 
         0.02795   -0.00432   -0.00681    0.00482 
C36A  1    0.170034    0.385182    0.850072   -31.00000    0.07239    0.03854 = 
         0.02512    0.00090    0.00356    0.00163 
AFIX 137 
H36D  2    0.107496    0.417442    0.835143   -31.00000   -1.50000 
H36E  2    0.178877    0.379606    0.909689   -31.00000   -1.50000 
H36F  2    0.157398    0.336595    0.824638   -31.00000   -1.50000 
AFIX   0 
C37A  1    0.569162    0.465840    0.893918   -31.00000    0.06606    0.04517 = 
         0.06531   -0.01655   -0.01863    0.00104 
AFIX 137 
H37D  2    0.629893    0.470255    0.858853   -31.00000   -1.50000 
H37E  2    0.580305    0.422259    0.929089   -31.00000   -1.50000 
H37F  2    0.566038    0.510187    0.927982   -31.00000   -1.50000 
AFIX   0 
C38A  1    0.358781    0.506991    0.624271   -31.00000    0.03604    0.04247 = 
         0.05400   -0.00111   -0.00198   -0.00515 
AFIX 137 
H38D  2    0.320842    0.554664    0.620202   -31.00000   -1.50000 
H38E  2    0.319819    0.471210    0.587790   -31.00000   -1.50000 
H38F  2    0.433524    0.513055    0.608317   -31.00000   -1.50000 
AFIX   0 
PART 0 
C39   1    0.202404    0.183669    0.714823    11.00000    0.04411    0.06696 = 
         0.07369    0.03758   -0.01818   -0.00854 
AFIX 137 
H39A  2    0.221428    0.220213    0.757725    11.00000   -1.50000 
H39B  2    0.269335    0.164524    0.693674    11.00000   -1.50000 
H39C  2    0.161945    0.142885    0.737638    11.00000   -1.50000 
AFIX   0 
C40   1    0.000951    0.254493    0.685076    11.00000    0.04356    0.06195 = 
         0.04190    0.01051    0.00746    0.00087 
AFIX 137 
H40A  2   -0.053713    0.276395    0.645462    11.00000   -1.50000 
H40B  2    0.023075    0.290991    0.727352    11.00000   -1.50000 
H40C  2   -0.030431    0.211235    0.710528    11.00000   -1.50000 
AFIX   0 
C41   1    0.061732    0.148892    0.574397    11.00000    0.05582    0.04543 = 
         0.05916   -0.00383    0.00539   -0.01620 
AFIX 137 
H41A  2    0.120392    0.122213    0.549779    11.00000   -1.50000 
H41B  2    0.008781    0.166977    0.531113    11.00000   -1.50000 
H41C  2    0.025058    0.115530    0.610549    11.00000   -1.50000 
AFIX   0 
PART 1 
H     2    0.233374    0.370797    0.513430    41.00000    0.07967 
PART 0 
PART 2 
CL2   3    0.271757    0.411084    0.475286   -41.00000    0.03232    0.03878 = 
         0.03439    0.00144   -0.00077   -0.00275 
HKLF 4 
 
REM  cm07w in P21/n #14 
REM R1 =  0.0443 for   4922 Fo > 4sig(Fo)  and  0.0720 for all   6670 data 
REM    631 parameters refined using    524 restraints 
 
END 
 
WGHT      0.0397      2.7577 
REM Highest difference peak  0.344,  deepest hole -0.307,  1-sigma level  0.055 
Q1    1   0.1545  0.3584  0.5786  11.00000  0.05    0.34 
Q2    1   0.1469  0.2666  0.5946  11.00000  0.05    0.34 
Q3    1  -0.0206  0.2002  0.6303  11.00000  0.05    0.32 
Q4    1   0.1398  0.2352  0.7569  11.00000  0.05    0.32 
Q5    1   0.1975  0.3145  0.6223  11.00000  0.05    0.31 
Q6    1   0.4059  0.3770  0.4592  11.00000  0.05    0.31 
Q7    1   0.2355  0.3584  0.5535  11.00000  0.05    0.28 
Q8    1  -0.0025  0.4424  0.6173  11.00000  0.05    0.27 
Q9    1   0.1823  0.2556  0.5174  11.00000  0.05    0.26 
Q10   1   0.1351  0.2157  0.6963  11.00000  0.05    0.25 
 
REM The information below was added by Olex2. 
REM 
REM R1 = 0.0443 for 4922 Fo > 4sig(Fo) and 0.0720 for all 44035 data 
REM n/a parameters refined using n/a restraints 
REM Highest difference peak 0.34, deepest hole -0.31 
REM Mean Shift 0, Max Shift 0.001. 
 
REM +++ Tabular Listing of Refinement Information +++ 
REM R1_all = 0.0720 
REM R1_gt = 0.0443 
REM wR_ref = 0.1006 
REM GOOF = 1.016 
REM Shift_max = 0.001 
REM Shift_mean = 0 
REM Reflections_all = 44035 
REM Reflections_gt = 4922 
REM Parameters = n/a 
REM Hole = -0.31 
REM Peak = 0.34 
REM Flack = n/a 
 
; 
_olex2_submission_special_instructions 'No special instructions were received' 
loop_ 
  _refln_index_h 
  _refln_index_k 
  _refln_index_l 
  _refln_F_squared_meas 
  _refln_F_squared_sigma 
 1 0 0 0.1 0.08 
 -1 0 0 0.02 0.04 
 -1 0 0 0.01 0.01 
 -1 0 0 0.06 0.07 
 1 0 0 0.12 0.11 
 1 0 0 -0.01 0.05 
 -1 0 0 -0.02 0.02 
 2 0 0 5.21 0.41 
 2 0 0 4.53 0.3 
 2 0 0 4.33 0.36 
 -2 0 0 5.6 0.39 
 -2 0 0 4.44 0.29 
 3 0 0 0.35 0.33 
 3 0 0 0.02 0.23 
 -3 0 0 0.09 0.36 
 -3 0 0 -0.01 0.21 
 -3 0 0 -0.16 0.22 
 3 0 0 -0.02 0.35 
 -3 0 0 0.01 0.31 
 4 0 0 79.04 2.36 
 4 0 0 80.13 2.53 
 -4 0 0 74.65 2.52 
 4 0 0 82.88 2.57 
 -4 0 0 80.41 2.38 
 -4 0 0 78 2.55 
 -4 0 0 80.36 2.36 
 -5 0 0 -0.19 0.26 
 5 0 0 -0.18 0.4 
 -5 0 0 0.32 0.4 
 -5 0 0 0.04 0.42 
 -5 0 0 0.5 0.3 
 5 0 0 0.5 0.28 
 -6 0 0 1.74 0.56 
 -6 0 0 0.82 0.32 
 -6 0 0 1 0.35 
 -6 0 0 0.73 0.45 
 6 0 0 1.06 0.31 
 7 0 0 -0.02 0.28 
 -7 0 0 0.29 0.34 
 -7 0 0 -0.37 0.47 
 -7 0 0 -0.31 0.44 
 -7 0 0 0.04 0.28 
 -8 0 0 5.61 0.87 
 -8 0 0 5.67 0.54 
 -8 0 0 5.61 0.6 
 8 0 0 5.93 0.56 
 -8 0 0 4.01 0.74 
 9 0 0 -0.07 0.32 
 -9 0 0 -0.8 0.54 
 -9 0 0 0.22 0.32 
 -9 0 0 0.14 0.54 
 -10 0 0 14.85 1.44 
 -10 0 0 10.02 1.2 
 10 0 0 12.83 0.81 
 -11 0 0 0.21 0.73 
 -11 0 0 -0.02 0.75 
 -12 0 0 22.87 1.99 
 -12 0 0 19.23 1.72 
 -13 0 0 -0.5 0.87 
 -13 0 0 -1.19 0.98 
 -14 0 0 4.6 1.25 
 -14 0 0 4.79 1.27 
 0 -1 0 0.01 0.01 
 0 1 0 -0.01 0.06 
 -2 -1 0 129.36 3.74 
 2 -1 0 130.16 3.72 
 2 -1 0 132.82 3.75 
 2 -1 0 130.28 3.79 
 2 -1 0 135.21 3.8 
 -2 -1 0 133.85 3.69 
 2 1 0 136.33 3.79 
 -2 1 0 132.91 3.76 
 2 1 0 133.59 3.69 
 2 1 0 133.54 3.74 
 -2 1 0 132.45 3.79 
 -2 1 0 126.13 3.72 
 2 1 0 134.39 3.67 
 -2 1 0 131.78 3.79 
 -3 -1 0 0.83 0.34 
 3 -1 0 0.72 0.37 
 3 -1 0 0.74 0.28 
 -3 -1 0 1.1 0.33 
 3 -1 0 1.8 0.41 
 3 -1 0 1.05 0.3 
 -3 -1 0 1.21 0.25 
 -3 1 0 1.12 0.38 
 -3 1 0 0.9 0.26 
 3 1 0 0.79 0.25 
 -3 1 0 0.98 0.38 
 -3 1 0 0.8 0.33 
 -3 1 0 0.69 0.3 
 3 1 0 0.86 0.33 
 3 1 0 1.19 0.37 
 4 -1 0 24.98 1.13 
 4 -1 0 25.05 0.96 
 -4 -1 0 25.56 0.9 
 4 -1 0 25.18 1.11 
 -4 -1 0 25.32 0.9 
 -4 -1 0 24.05 1.08 
 -4 -1 0 24.77 1.09 
 4 -1 0 25.06 0.98 
 -4 1 0 24.05 1.06 
 -4 1 0 24.16 1.13 
 -4 1 0 24.47 1.11 
 4 1 0 26.23 1.12 
 -4 1 0 25.3 1 
 -4 1 0 24.55 0.94 
 4 1 0 24.43 0.91 
 4 1 0 27.08 1.08 
 -5 -1 0 13.31 0.64 
 -5 -1 0 11.97 0.86 
 -5 -1 0 11.34 0.92 
 5 -1 0 12.89 0.7 
 5 -1 0 12.53 0.89 
 -5 -1 0 13.96 0.64 
 -5 1 0 12.96 0.68 
 -5 1 0 13.17 0.89 
 -5 1 0 13.01 0.75 
 5 1 0 12.94 0.65 
 -5 1 0 13.23 0.95 
 -6 -1 0 9.24 0.61 
 -6 -1 0 9.24 0.59 
 6 -1 0 10.34 0.66 
 -6 -1 0 10.92 0.95 
 -6 -1 0 9.64 0.81 
 -6 1 0 9.71 0.62 
 -6 1 0 10.36 0.71 
 -6 1 0 11.26 0.91 
 6 1 0 10.71 0.62 
 -6 1 0 9.27 0.87 
 7 -1 0 7.05 0.58 
 -7 -1 0 8.07 0.84 
 -7 -1 0 7.03 0.57 
 -7 -1 0 7.4 0.59 
 -7 -1 0 7.37 0.82 
 -7 1 0 7.48 0.66 
 -7 1 0 7.37 0.6 
 -7 1 0 8.87 0.9 
 7 1 0 8.13 0.6 
 -7 1 0 7.57 0.89 
 -8 -1 0 7.14 0.9 
 -8 -1 0 5.31 0.54 
 -8 -1 0 5.32 0.51 
 -8 -1 0 5.6 0.8 
 8 -1 0 6.24 0.59 
 -8 1 0 5.81 0.56 
 -8 1 0 4.91 0.81 
 8 1 0 6.32 0.56 
 -8 1 0 6.47 0.88 
 -9 -1 0 1.66 0.73 
 -9 -1 0 -0.06 0.3 
 -9 -1 0 -0.22 0.53 
 9 -1 0 0.62 0.35 
 -9 1 0 0.31 0.33 
 -9 1 0 -0.43 0.55 
 9 1 0 -0.1 0.31 
 -9 1 0 -0.02 0.61 
 -10 -1 0 0.21 0.67 
 10 -1 0 -0.19 0.36 
 -10 -1 0 -0.84 0.69 
 -10 1 0 -0.24 0.65 
 10 1 0 0.36 0.35 
 -10 1 0 0.38 0.66 
 -11 -1 0 11.94 1.4 
 -11 -1 0 11.99 1.28 
 -11 1 0 9.63 1.22 
 -11 1 0 12.18 1.37 
 -12 -1 0 9.84 1.41 
 -12 -1 0 10.52 1.35 
 -12 1 0 10.53 1.33 
 -12 1 0 7.93 1.29 
 -13 -1 0 1.26 0.95 
 -13 -1 0 -0.12 0.9 
 -13 1 0 -0.68 0.88 
 -13 1 0 1.75 1.1 
 -14 -1 0 6.57 1.36 
 -14 -1 0 5.18 1.3 
 -14 1 0 5.36 1.28 
 -14 1 0 4.71 1.29 
 2 -2 0 78.7 2.41 
 2 -2 0 82 2.44 
 -2 -2 0 81.77 2.29 
 -2 -2 0 80.33 2.41 
 -2 -2 0 80.74 2.36 
 2 -2 0 82.51 2.44 
 -2 -2 0 79.37 2.35 
 2 -2 0 80.1 2.43 
 2 -2 0 83.31 2.39 
 2 2 0 83.52 2.43 
 -2 2 0 81.15 2.45 
 2 2 0 79.68 2.29 
 -2 2 0 83.93 2.45 
 2 2 0 80.87 2.35 
 -2 2 0 84.83 2.4 
 -2 2 0 80.32 2.4 
 -3 -2 0 5 0.4 
 3 -2 0 6.54 0.56 
 -3 -2 0 6.82 0.5 
 3 -2 0 8.61 0.65 
 -3 -2 0 7.84 0.58 
 3 -2 0 5.94 0.48 
 3 -2 0 6.99 0.53 
 3 -2 0 6.69 0.52 
 -3 2 0 5.63 0.49 
 -3 2 0 7.97 0.56 
 3 2 0 6.44 0.46 
 -3 2 0 6.33 0.51 
 3 2 0 5.32 0.44 
 3 2 0 6.36 0.53 
 3 2 0 5.92 0.36 
 -3 2 0 6.22 0.56 
 -3 2 0 6.86 0.58 
 4 -2 0 2.49 0.4 
 4 -2 0 1.98 0.4 
 -4 -2 0 2.52 0.44 
 -4 -2 0 3.23 0.52 
 4 -2 0 2.51 0.49 
 -4 -2 0 2.18 0.32 
 4 -2 0 2.32 0.47 
 4 2 0 2.92 0.3 
 4 2 0 3.22 0.43 
 -4 2 0 3.38 0.52 
 -4 2 0 2.3 0.49 
 -4 2 0 2.18 0.38 
 4 2 0 2.31 0.33 
 -4 2 0 2.76 0.46 
 -4 2 0 2.26 0.42 
 4 2 0 1.95 0.44 
 5 -2 0 3.66 0.46 
 -5 -2 0 4.38 0.55 
 5 -2 0 3.11 0.46 
 5 -2 0 3.05 0.57 
 -5 -2 0 3.01 0.58 
 -5 -2 0 3.61 0.37 
 -5 2 0 3.65 0.59 
 -5 2 0 2.78 0.41 
 -5 2 0 3.58 0.6 
 5 2 0 2.96 0.37 
 -5 2 0 3.35 0.53 
 5 2 0 3.12 0.36 
 -5 2 0 3.28 0.48 
 -6 -2 0 0.68 0.28 
 6 -2 0 0.54 0.35 
 6 -2 0 -0.06 0.45 
 -6 -2 0 0.26 0.5 
 -6 -2 0 0.89 0.46 
 -6 -2 0 0.28 0.27 
 -6 2 0 0.76 0.45 
 -6 2 0 0.82 0.33 
 6 2 0 0.31 0.28 
 -6 2 0 0.39 0.53 
 6 2 0 0.41 0.28 
 -7 -2 0 28.19 1.1 
 -7 -2 0 27.7 1.37 
 7 -2 0 28.55 1.21 
 -7 -2 0 27.35 1.09 
 -7 -2 0 30.06 1.44 
 7 2 0 28.15 1.11 
 -7 2 0 28.58 1.47 
 -7 2 0 27.86 1.46 
 -7 2 0 29.31 1.18 
 7 2 0 29.42 1.1 
 -8 -2 0 0.87 0.61 
 -8 -2 0 -0.02 0.5 
 -8 -2 0 0.2 0.31 
 8 -2 0 0.68 0.38 
 -8 -2 0 1.27 0.32 
 8 2 0 0.4 0.3 
 -8 2 0 0.11 0.51 
 8 2 0 0.43 0.32 
 -8 2 0 0.52 0.35 
 -8 2 0 0.71 0.54 
 -9 -2 0 0.39 0.58 
 -9 -2 0 1.11 0.35 
 9 -2 0 1.44 0.42 
 -9 -2 0 0.53 0.59 
 -9 -2 0 0.89 0.36 
 -9 2 0 0.19 0.58 
 9 2 0 0.5 0.34 
 9 2 0 1.08 0.37 
 -9 2 0 1.41 0.68 
 10 -2 0 4.42 0.6 
 -10 -2 0 3.86 0.94 
 -10 -2 0 4.66 0.86 
 -10 2 0 4.61 0.99 
 10 2 0 4.82 0.58 
 -10 2 0 5.14 0.93 
 -11 -2 0 6.96 1.1 
 -11 -2 0 7.01 1.1 
 -11 2 0 6.27 1.09 
 -11 2 0 5.23 1.07 
 -12 -2 0 17.23 1.68 
 -12 -2 0 22.3 1.81 
 -12 2 0 17.49 1.68 
 -12 2 0 20.26 1.8 
 -13 -2 0 1.66 1.13 
 -13 -2 0 1.52 0.96 
 -13 2 0 2.7 1.04 
 -13 2 0 2.84 1.08 
 -14 -2 0 1.73 1.07 
 -14 -2 0 0.21 1.14 
 -14 2 0 0.16 1.02 
 -14 2 0 1.01 1.02 
 0 -3 0 0.04 0.16 
 0 -3 0 0.7 0.15 
 0 3 0 0.39 0.23 
 0 3 0 0.57 0.15 
 0 3 0 0.59 0.15 
 1 -3 0 38.9 1.27 
 1 -3 0 41.17 1.3 
 -1 -3 0 42.8 1.34 
 -1 -3 0 38.61 1.26 
 1 -3 0 42.39 1.29 
 -1 -3 0 40.88 1.19 
 -1 3 0 40.26 1.3 
 -1 3 0 41.91 1.28 
 1 3 0 42.57 1.18 
 -1 3 0 40.1 1.3 
 2 -3 0 72.94 2.23 
 2 -3 0 72.55 2.25 
 2 -3 0 73.64 2.23 
 2 -3 0 72.27 2.16 
 -2 -3 0 71.02 2.17 
 -2 -3 0 72.02 2.09 
 -2 -3 0 71.85 2.1 
 2 -3 0 72.02 2.24 
 -2 3 0 73.27 2.17 
 2 3 0 71.87 2.09 
 2 3 0 72.76 2.2 
 -2 3 0 71 2.22 
 3 -3 0 18.97 0.83 
 3 -3 0 17.43 0.86 
 3 -3 0 16.51 0.86 
 -3 -3 0 17.43 0.74 
 -3 -3 0 17.1 0.81 
 -3 -3 0 17.11 0.65 
 3 -3 0 18.45 0.91 
 -3 -3 0 16.93 0.75 
 3 -3 0 17.65 0.84 
 -3 3 0 18.07 0.91 
 3 3 0 18.11 0.88 
 -3 3 0 17.65 0.92 
 -3 3 0 18.07 0.82 
 3 3 0 17.05 0.64 
 -3 3 0 18.54 0.8 
 3 3 0 16.99 0.75 
 -4 -3 0 21.17 0.85 
 4 -3 0 22.44 1.06 
 4 -3 0 24.12 1.23 
 4 -3 0 21.74 1.01 
 -4 -3 0 21.15 0.96 
 4 -3 0 22.09 1.02 
 -4 -3 0 22.14 1.03 
 4 -3 0 20.68 0.99 
 -4 3 0 21.72 1.09 
 -4 3 0 23.01 1.07 
 4 3 0 21.67 1.05 
 -4 3 0 23.59 1.01 
 4 3 0 20.91 0.77 
 -4 3 0 21.19 0.96 
 -5 -3 0 125.96 3.69 
 5 -3 0 121.6 3.79 
 -5 -3 0 128.82 3.84 
 5 -3 0 125.93 3.86 
 5 -3 0 124.12 3.93 
 -5 -3 0 132.95 3.93 
 -5 3 0 122.46 3.93 
 5 3 0 125.11 3.7 
 -5 3 0 123.16 3.95 
 -5 3 0 126.88 3.78 
 -5 3 0 132.34 3.86 
 5 3 0 126.03 3.6 
 6 -3 0 3.97 0.54 
 -6 -3 0 4.24 0.44 
 6 -3 0 3.65 0.62 
 -6 -3 0 5.44 0.63 
 -6 -3 0 3.64 0.64 
 -6 3 0 4.73 0.67 
 -6 3 0 4.18 0.5 
 -6 3 0 4.9 0.7 
 6 3 0 4.4 0.4 
 6 3 0 4.64 0.47 
 7 -3 0 57.2 1.99 
 -7 -3 0 55.54 1.77 
 -7 -3 0 56.92 2.21 
 -7 -3 0 53.97 2.1 
 -7 -3 0 53.48 1.83 
 -7 3 0 57.29 1.96 
 -7 3 0 54.31 2.24 
 7 3 0 55.57 1.86 
 7 3 0 57.37 1.8 
 -7 3 0 55.41 2.22 
 -8 -3 0 16.86 0.84 
 8 -3 0 16.45 0.98 
 -8 -3 0 16.34 0.81 
 -8 -3 0 20.02 1.19 
 -8 -3 0 16.73 1.27 
 -8 3 0 17.97 1.28 
 8 3 0 18.26 0.82 
 -8 3 0 20.98 1.38 
 8 3 0 18.06 0.88 
 -9 -3 0 0.08 0.3 
 9 -3 0 0.37 0.41 
 -9 -3 0 0.19 0.56 
 -9 -3 0 0.13 0.3 
 -9 -3 0 -0.28 0.51 
 -9 3 0 0.16 0.64 
 9 3 0 0.66 0.34 
 -9 3 0 -0.11 0.57 
 -10 -3 0 7.1 1.09 
 -10 -3 0 8.44 1.08 
 10 -3 0 7.98 0.76 
 -10 3 0 9.24 1.16 
 -10 3 0 8.35 1.13 
 -11 -3 0 1.91 0.77 
 -11 -3 0 0.45 0.85 
 -11 3 0 -0.08 0.82 
 -11 3 0 -0.16 0.78 
 -12 -3 0 1.38 0.86 
 -12 -3 0 0.57 0.84 
 -12 3 0 1.49 0.91 
 -12 3 0 2.43 1 
 -13 -3 0 6.21 1.23 
 -13 -3 0 5.73 1.37 
 -13 3 0 3.23 1.2 
 -13 3 0 5.54 1.24 
 -14 -3 0 4.75 1.24 
 -14 -3 0 2.98 1.14 
 -14 3 0 2.37 1.28 
 0 -4 0 54.78 1.71 
 0 -4 0 53.77 1.62 
 0 4 0 56.16 1.61 
 0 4 0 53.07 1.61 
 0 4 0 55.22 1.72 
 1 -4 0 27.04 0.94 
 1 -4 0 26.41 0.93 
 1 -4 0 26.51 0.96 
 -1 -4 0 26.79 1.01 
 -1 -4 0 25.57 0.9 
 -1 -4 0 25.63 0.81 
 -1 4 0 26.09 0.96 
 -1 4 0 25.31 0.94 
 1 4 0 25.61 1 
 -1 4 0 25.27 0.93 
 1 4 0 24.47 0.79 
 2 -4 0 41.35 1.49 
 2 -4 0 40.78 1.42 
 -2 -4 0 41.67 1.37 
 2 -4 0 40.84 1.42 
 2 -4 0 39.74 1.36 
 -2 -4 0 40.68 1.26 
 2 4 0 41.07 1.38 
 -2 4 0 39.11 1.41 
 2 4 0 41.31 1.24 
 -2 4 0 42.37 1.37 
 3 -4 0 13.89 0.83 
 -3 -4 0 13.7 0.65 
 -3 -4 0 13.35 0.67 
 3 -4 0 14.32 0.83 
 -3 -4 0 12.65 0.7 
 3 -4 0 13.48 0.71 
 3 -4 0 13.62 0.83 
 3 -4 0 13.16 0.8 
 -3 -4 0 12.83 0.58 
 -3 4 0 13.43 0.82 
 3 4 0 14.19 0.76 
 -3 4 0 13.26 0.72 
 -3 4 0 12.86 0.83 
 3 4 0 12.02 0.61 
 -4 -4 0 38.3 1.44 
 -4 -4 0 37.18 1.35 
 4 -4 0 36.11 1.44 
 4 -4 0 38.55 1.54 
 -4 -4 0 38.21 1.21 
 4 -4 0 38.85 1.41 
 4 -4 0 39.24 1.63 
 -4 -4 0 37.09 1.33 
 -4 4 0 36.34 1.5 
 -4 4 0 38.36 1.51 
 4 4 0 39.56 1.49 
 -4 4 0 39.34 1.42 
 5 -4 0 6.8 0.74 
 -5 -4 0 5.23 0.5 
 5 -4 0 6.42 0.63 
 -5 -4 0 5.72 0.65 
 -5 -4 0 5.9 0.56 
 5 -4 0 6.14 0.63 
 -5 4 0 5.98 0.68 
 -5 4 0 5.34 0.64 
 -5 4 0 5.66 0.71 
 5 4 0 5.55 0.39 
 -6 -4 0 0.16 0.46 
 -6 -4 0 0.28 0.38 
 6 -4 0 0.48 0.46 
 -6 -4 0 0.23 0.29 
 6 -4 0 0.39 0.4 
 6 4 0 0.33 0.24 
 -6 4 0 -0.25 0.47 
 -6 4 0 0.78 0.49 
 -7 -4 0 13.01 1.07 
 7 -4 0 14.19 0.92 
 -7 -4 0 12.38 0.91 
 -7 -4 0 9.36 0.68 
 -7 -4 0 11.52 0.59 
 7 4 0 11.13 0.59 
 -7 4 0 13.78 1.03 
 -7 4 0 12.33 1.12 
 8 -4 0 13.23 0.95 
 -8 -4 0 13.97 0.69 
 -8 -4 0 14.24 0.78 
 -8 -4 0 14.29 1.11 
 -8 -4 0 13.77 1.06 
 8 4 0 14.65 0.68 
 -8 4 0 16.1 1.33 
 -8 4 0 13.47 1.12 
 -9 -4 0 2.96 0.39 
 9 -4 0 2.78 0.57 
 -9 -4 0 3.71 0.74 
 -9 -4 0 2.54 0.43 
 -9 -4 0 3.08 0.75 
 -9 4 0 2.41 0.81 
 -9 4 0 3.95 0.8 
 -10 -4 0 4.38 0.87 
 10 -4 0 5.05 0.69 
 -10 -4 0 4.85 0.99 
 -10 4 0 5.42 1 
 -10 4 0 3.74 0.91 
 -11 -4 0 3.1 0.87 
 -11 -4 0 1.34 0.92 
 -11 4 0 4.62 1.05 
 -11 4 0 3.14 0.93 
 -12 -4 0 0.64 0.95 
 -12 -4 0 -0.18 0.76 
 -12 4 0 0.15 0.86 
 -12 4 0 -0.6 0.8 
 -13 -4 0 4.17 1.07 
 -13 -4 0 5.17 1.2 
 -13 4 0 2.96 1.21 
 -14 -4 0 1.62 1.02 
 -14 -4 0 -1.77 1.05 
 -14 4 0 0.27 1.01 
 0 -5 0 0.43 0.23 
 0 -5 0 -0.18 0.28 
 0 5 0 -0.05 0.2 
 0 5 0 0.37 0.2 
 0 5 0 -0.04 0.32 
 -1 -5 0 113.19 3.49 
 -1 -5 0 117.37 3.31 
 1 -5 0 117.2 3.44 
 1 -5 0 119.56 3.44 
 1 -5 0 117.51 3.43 
 -1 5 0 115.21 3.42 
 -1 5 0 121.07 3.46 
 -1 5 0 121.07 3.44 
 1 5 0 119.09 3.5 
 1 5 0 117.74 3.28 
 2 -5 0 1.53 0.38 
 -2 -5 0 1.83 0.24 
 2 -5 0 1.57 0.45 
 2 -5 0 2.14 0.41 
 2 -5 0 2.44 0.36 
 -2 -5 0 2.05 0.35 
 -2 -5 0 1.89 0.46 
 2 -5 0 1.43 0.46 
 2 5 0 1.72 0.22 
 -2 5 0 2.48 0.44 
 -2 5 0 2.15 0.39 
 -2 5 0 1.85 0.37 
 -3 -5 0 0.45 0.3 
 3 -5 0 0.87 0.39 
 3 -5 0 1.09 0.37 
 -3 -5 0 0.6 0.28 
 -3 -5 0 0.98 0.27 
 3 -5 0 1.1 0.44 
 3 -5 0 0.27 0.4 
 -3 5 0 0.57 0.33 
 -3 5 0 0.79 0.35 
 -3 5 0 1.02 0.43 
 3 5 0 1.15 0.38 
 -4 -5 0 11.64 0.69 
 4 -5 0 13.6 0.89 
 -4 -5 0 12.06 0.59 
 -4 -5 0 12.32 0.7 
 -4 -5 0 12.72 0.76 
 4 -5 0 10.9 0.84 
 4 -5 0 12.97 0.8 
 -4 5 0 11.38 0.76 
 4 5 0 12.3 0.81 
 -4 5 0 12.27 0.86 
 -4 5 0 10.95 0.81 
 -5 -5 0 48.99 1.7 
 -5 -5 0 47.1 1.73 
 -5 -5 0 48.72 1.83 
 5 -5 0 48.37 1.84 
 -5 -5 0 50.31 1.55 
 5 -5 0 52.6 1.96 
 5 -5 0 49.91 1.81 
 -5 5 0 48.15 1.91 
 5 5 0 50.52 1.87 
 -5 5 0 50.12 1.91 
 -6 -5 0 32.62 1.44 
 -6 -5 0 29.58 1.21 
 6 -5 0 31.08 1.5 
 6 -5 0 30.1 1.38 
 6 -5 0 31.39 1.37 
 -6 -5 0 28.34 1.3 
 6 5 0 30.27 1.39 
 -6 5 0 30.79 1.5 
 -6 5 0 29.91 1.48 
 7 -5 0 156.75 4.88 
 -7 -5 0 147.41 4.64 
 -7 -5 0 151.31 4.76 
 7 -5 0 150.35 4.65 
 -7 -5 0 150.08 4.49 
 7 5 0 149.08 4.3 
 -7 5 0 150.37 4.84 
 -7 5 0 153.57 4.88 
 -8 -5 0 0.05 0.24 
 -8 -5 0 0.23 0.49 
 8 -5 0 0.05 0.44 
 -8 -5 0 0.19 0.34 
 -8 -5 0 -0.08 0.49 
 -8 5 0 -0.71 0.6 
 -8 5 0 1.11 0.6 
 8 5 0 0.09 0.24 
 -9 -5 0 0.25 0.52 
 -9 -5 0 0.02 0.25 
 9 -5 0 0.68 0.49 
 -9 -5 0 0.43 0.67 
 -9 5 0 -0.44 0.58 
 -9 5 0 -0.03 0.63 
 -10 -5 0 1.63 0.7 
 -10 -5 0 1.03 0.7 
 10 -5 0 0.57 0.52 
 -10 5 0 0.93 0.75 
 -10 5 0 1.34 0.82 
 -11 -5 0 22.83 1.85 
 -11 -5 0 20.37 1.59 
 -11 5 0 19.75 1.82 
 -11 5 0 20.2 1.74 
 -12 -5 0 0.5 0.78 
 -12 -5 0 0.85 0.96 
 -12 5 0 -0.7 0.77 
 -13 -5 0 0.03 0.85 
 -13 -5 0 0.73 1.06 
 -13 5 0 0.71 1.05 
 -14 -5 0 0.26 0.93 
 -14 -5 0 -1.39 1.06 
 -14 5 0 1.66 1.29 
 0 -6 0 29.59 1.05 
 0 -6 0 30.49 1.16 
 0 6 0 31.62 1.2 
 0 6 0 30.03 1.01 
 0 6 0 29.61 1.01 
 1 -6 0 39.19 1.33 
 -1 -6 0 39.27 1.21 
 -1 -6 0 35.74 1.41 
 1 -6 0 38.89 1.35 
 1 -6 0 36.75 1.35 
 1 6 0 37.87 1.43 
 1 6 0 38.17 1.16 
 -1 6 0 40.6 1.35 
 1 6 0 38.14 1.16 
 -1 6 0 38.68 1.32 
 -1 6 0 39.36 1.39 
 -2 -6 0 8.55 0.6 
 2 -6 0 11.5 0.71 
 -2 -6 0 10.1 0.78 
 -2 -6 0 9.52 0.47 
 2 -6 0 10.07 0.61 
 2 -6 0 7.72 0.61 
 -2 6 0 9.87 0.68 
 -2 6 0 10.6 0.69 
 -2 6 0 8.05 0.66 
 2 6 0 9.13 0.41 
 3 -6 0 2.65 0.43 
 -3 -6 0 2.29 0.53 
 -3 -6 0 1.9 0.3 
 3 -6 0 1.19 0.43 
 -3 -6 0 1.58 0.36 
 3 -6 0 2.31 0.47 
 3 -6 0 2.21 0.48 
 -3 6 0 1.85 0.41 
 3 6 0 1.89 0.4 
 -3 6 0 1.55 0.48 
 -4 -6 0 0.13 0.29 
 -4 -6 0 0.14 0.27 
 4 -6 0 0.16 0.37 
 -4 -6 0 -0.2 0.3 
 4 -6 0 -0.16 0.43 
 -4 -6 0 -0.15 0.28 
 4 -6 0 -0.03 0.4 
 -4 6 0 0.22 0.34 
 4 6 0 0.37 0.38 
 -4 6 0 -0.16 0.38 
 -4 6 0 -0.12 0.37 
 5 -6 0 0.42 0.41 
 -5 -6 0 0.77 0.4 
 -5 -6 0 0.51 0.34 
 5 -6 0 0.66 0.45 
 -5 -6 0 0.39 0.28 
 5 -6 0 1.12 0.52 
 -5 -6 0 0.4 0.31 
 -5 6 0 0.75 0.46 
 -5 6 0 0.47 0.45 
 5 6 0 1.4 0.49 
 -6 -6 0 0.35 0.25 
 -6 -6 0 0.45 0.32 
 6 -6 0 1.88 0.61 
 -6 -6 0 1.48 0.5 
 6 -6 0 1.53 0.49 
 -6 -6 0 0.19 0.39 
 6 -6 0 0.83 0.48 
 -6 6 0 0.5 0.57 
 6 6 0 0.73 0.48 
 -6 6 0 0.59 0.51 
 -7 -6 0 15.42 1.13 
 -7 -6 0 16.96 1.04 
 7 -6 0 18.28 1.13 
 7 -6 0 15.34 1.08 
 -7 -6 0 15.56 0.88 
 7 -6 0 17.25 1.27 
 -7 6 0 17.05 1.23 
 -7 6 0 16.09 1.17 
 -8 -6 0 32.28 1.49 
 8 -6 0 34.55 1.59 
 -8 -6 0 32.06 1.68 
 -8 -6 0 32.42 1.56 
 -8 6 0 34.53 1.77 
 -8 6 0 34.49 1.78 
 -9 -6 0 3.39 0.75 
 9 -6 0 2.98 0.66 
 -9 -6 0 2.83 0.33 
 -9 -6 0 3 0.7 
 -9 6 0 3.22 0.91 
 -9 6 0 2.24 0.72 
 -10 -6 0 1.2 0.77 
 -10 -6 0 0.34 0.6 
 10 -6 0 0.67 0.55 
 -10 6 0 -0.4 0.69 
 -10 6 0 0.29 0.66 
 -11 -6 0 2.27 0.88 
 -11 -6 0 4.63 0.91 
 -11 6 0 2.33 0.94 
 -12 -6 0 0.12 0.74 
 -12 -6 0 -0.29 0.9 
 -12 6 0 -1.14 0.87 
 -13 -6 0 1.77 0.92 
 -13 -6 0 2.91 1.18 
 -13 6 0 0.97 1.07 
 -14 -6 0 -0.17 0.89 
 -14 -6 0 3.02 1.24 
 -14 6 0 -0.08 1.16 
 0 -7 0 0.19 0.35 
 0 -7 0 -0.26 0.24 
 0 7 0 0.69 0.38 
 0 7 0 0 0.22 
 1 -7 0 0.49 0.3 
 -1 -7 0 1.29 0.41 
 -1 -7 0 0.84 0.23 
 1 -7 0 0.46 0.33 
 1 -7 0 0.87 0.34 
 -1 7 0 0.42 0.29 
 1 7 0 0.49 0.42 
 1 7 0 0.55 0.19 
 -1 7 0 1.33 0.4 
 -1 7 0 0.51 0.44 
 -2 -7 0 3.28 0.3 
 2 -7 0 3.3 0.49 
 -2 -7 0 2.59 0.52 
 2 -7 0 2.94 0.44 
 -2 -7 0 2.82 0.41 
 2 -7 0 2.78 0.42 
 -2 7 0 3.57 0.46 
 -2 7 0 2.31 0.45 
 -2 7 0 3.83 0.52 
 3 -7 0 11.42 0.76 
 -3 -7 0 11.96 0.58 
 3 -7 0 10.7 0.82 
 -3 -7 0 12.34 0.73 
 3 -7 0 11.24 0.93 
 -3 -7 0 10.42 0.84 
 -3 7 0 12.6 0.76 
 -3 7 0 10.63 0.78 
 3 7 0 12.88 0.92 
 -3 7 0 10.45 0.79 
 4 -7 0 17.78 1.08 
 -4 -7 0 21.93 0.88 
 -4 -7 0 20.34 0.98 
 4 -7 0 21.81 1.15 
 4 -7 0 20.12 0.99 
 -4 -7 0 18.58 1.1 
 -4 -7 0 20.08 0.88 
 -4 7 0 20.93 1.13 
 4 7 0 21.27 1.09 
 -4 7 0 20.76 1.14 
 -5 -7 0 21.33 1.06 
 -5 -7 0 20.17 0.84 
 5 -7 0 20.06 1.05 
 5 -7 0 20.92 1.2 
 -5 -7 0 18.23 0.91 
 5 -7 0 19.39 1.2 
 -5 7 0 20.56 1.16 
 5 7 0 19.1 1.09 
 -5 7 0 17.46 1.14 
 -6 -7 0 39.52 1.54 
 6 -7 0 40.78 1.64 
 -6 -7 0 42.99 1.71 
 6 -7 0 41.2 1.84 
 -6 -7 0 40.93 1.36 
 6 -7 0 39.9 1.75 
 6 7 0 39.12 1.7 
 -6 7 0 38.39 1.76 
 -6 7 0 38.84 1.78 
 7 -7 0 11.15 0.95 
 -7 -7 0 11.4 1.01 
 -7 -7 0 10.19 0.86 
 7 -7 0 11.55 1.09 
 7 -7 0 12.76 1.07 
 7 7 0 12.49 1.07 
 -7 7 0 11.02 1.1 
 -7 7 0 9.55 1.02 
 -8 -7 0 10.68 0.93 
 8 -7 0 13.44 1.14 
 -8 -7 0 10.94 1.08 
 -8 7 0 11.25 1.15 
 -8 7 0 12.47 1.22 
 -9 -7 0 11.1 1.13 
 -9 -7 0 11.25 1.05 
 9 -7 0 12.07 1.12 
 -9 7 0 12.35 1.27 
 -9 7 0 11.42 1.3 
 -10 -7 0 16.87 1.53 
 10 -7 0 14.64 1.24 
 -10 -7 0 13.57 1.22 
 -10 7 0 13.47 1.46 
 11 -7 0 4.94 1.18 
 -11 -7 0 4.13 1.07 
 -11 -7 0 3.42 0.86 
 -11 7 0 3.58 1 
 -12 -7 0 11.83 1.34 
 -12 -7 0 11.57 1.5 
 -12 7 0 8.65 1.37 
 -13 -7 0 0.28 0.84 
 -13 -7 0 0.28 1.01 
 -13 7 0 0.09 1.07 
 0 -8 0 50.59 1.8 
 0 8 0 48.82 1.9 
 0 8 0 52.43 1.61 
 1 -8 0 0.31 0.3 
 -1 -8 0 0.29 0.39 
 1 -8 0 0.52 0.34 
 -1 -8 0 0.16 0.21 
 1 8 0 -0.34 0.41 
 -1 8 0 0.55 0.39 
 1 8 0 0.14 0.18 
 -1 8 0 0.51 0.51 
 -1 8 0 0.12 0.26 
 -2 -8 0 86.67 2.55 
 -2 -8 0 85.62 2.86 
 2 -8 0 85.9 2.76 
 -2 -8 0 85.94 2.7 
 2 -8 0 88.6 2.79 
 2 -8 0 85.58 2.75 
 2 8 0 87.51 2.86 
 -2 8 0 90.09 2.77 
 -2 8 0 86.61 2.74 
 3 -8 0 4.69 0.68 
 3 -8 0 6.27 0.67 
 -3 -8 0 5.75 0.45 
 3 -8 0 6.53 0.61 
 -3 -8 0 6.02 0.56 
 -3 -8 0 5.76 0.73 
 -3 8 0 7.27 0.67 
 -3 8 0 6.84 0.68 
 3 8 0 7.84 0.76 
 4 -8 0 -0.53 0.39 
 -4 -8 0 0.39 0.54 
 4 -8 0 0.35 0.37 
 -4 -8 0 0.23 0.33 
 4 -8 0 -0.11 0.46 
 -4 -8 0 0.4 0.34 
 -4 -8 0 0.08 0.26 
 4 8 0 0.16 0.43 
 -4 8 0 -0.04 0.11 
 -4 8 0 -0.72 0.4 
 5 -8 0 0.42 0.5 
 -5 -8 0 0.02 0.52 
 -5 -8 0 -0.15 0.35 
 -5 -8 0 0.32 0.32 
 5 -8 0 -0.31 0.47 
 5 -8 0 0.65 0.44 
 -5 -8 0 0.56 0.31 
 -5 8 0 1.56 0.55 
 5 8 0 0.53 0.46 
 -5 8 0 -0.12 0.42 
 -6 -8 0 1.92 0.43 
 6 -8 0 1.51 0.57 
 -6 -8 0 1.41 0.49 
 -6 -8 0 1.43 0.36 
 6 -8 0 1.65 0.5 
 6 -8 0 1.64 0.61 
 -6 8 0 1.75 0.62 
 -6 8 0 1.72 0.55 
 6 8 0 1.71 0.58 
 -7 -8 0 6 0.68 
 7 -8 0 7.25 0.94 
 7 -8 0 6.64 0.79 
 7 -8 0 7.07 0.89 
 -7 -8 0 6.05 0.5 
 -7 -8 0 8.41 0.88 
 7 8 0 7.45 0.89 
 -7 8 0 6.21 0.89 
 -7 8 0 7.29 0.87 
 -8 -8 0 25.04 1.48 
 8 -8 0 25.94 1.51 
 -8 -8 0 27.57 1.36 
 8 -8 0 25.55 1.44 
 -8 8 0 24.18 1.62 
 -8 8 0 23.67 1.53 
 8 8 0 26.01 1.5 
 9 -8 0 4.21 0.8 
 -9 -8 0 5.83 0.94 
 -9 -8 0 5.36 0.78 
 -9 8 0 3.72 0.89 
 10 -8 0 2.99 0.76 
 -10 -8 0 3.2 0.89 
 -10 -8 0 2.21 0.7 
 -10 8 0 3.16 0.99 
 -11 -8 0 0.73 0.71 
 11 -8 0 0.4 0.64 
 -11 -8 0 1.67 0.93 
 -11 8 0 0.99 0.86 
 -12 -8 0 3.72 0.94 
 -12 -8 0 2.23 1.05 
 -12 8 0 1.61 1.08 
 -13 -8 0 0.78 0.88 
 -13 -8 0 -0.54 0.97 
 -13 8 0 -0.12 1.08 
 0 -9 0 0.02 0.37 
 0 -9 0 0.29 0.27 
 0 9 0 -0.14 0.22 
 0 9 0 -1.04 0.43 
 -1 -9 0 0.91 0.28 
 -1 -9 0 0.86 0.44 
 1 -9 0 0.41 0.3 
 1 -9 0 1.12 0.38 
 -1 9 0 0.53 0.31 
 1 9 0 0.45 0.48 
 -1 9 0 1.19 0.53 
 1 9 0 0.93 0.22 
 -2 -9 0 1.71 0.51 
 -2 -9 0 1.05 0.37 
 -2 -9 0 0.14 0.23 
 2 -9 0 0.82 0.42 
 2 -9 0 0.6 0.36 
 -2 9 0 0.16 0.33 
 -2 9 0 0.5 0.53 
 2 9 0 0.67 0.48 
 -3 -9 0 35.97 1.21 
 -3 -9 0 36.82 1.4 
 3 -9 0 35.32 1.68 
 3 -9 0 37.16 1.51 
 -3 -9 0 33.18 1.53 
 3 -9 0 37.04 1.44 
 -3 9 0 33.65 1.47 
 3 9 0 35.11 1.54 
 -3 9 0 35.02 1.45 
 4 -9 0 10.15 0.87 
 -4 -9 0 8.19 0.57 
 -4 -9 0 8.91 0.94 
 -4 -9 0 8.81 0.69 
 4 -9 0 8.37 0.74 
 -4 -9 0 8.85 0.74 
 4 -9 0 8.56 0.93 
 -4 9 0 9.24 0.81 
 4 9 0 8.91 0.86 
 -4 9 0 8.79 0.83 
 5 -9 0 1.78 0.49 
 -5 -9 0 1.21 0.58 
 5 -9 0 1.06 0.5 
 -5 -9 0 0.96 0.34 
 -5 -9 0 1.15 0.37 
 -5 -9 0 1.11 0.44 
 5 -9 0 0.64 0.57 
 5 9 0 1.65 0.55 
 -5 9 0 0.05 0.31 
 -5 9 0 0.54 0.51 
 -6 -9 0 46.12 1.87 
 6 -9 0 44.78 1.82 
 -6 -9 0 43.63 1.66 
 -6 -9 0 46.66 1.6 
 -6 -9 0 43.64 2.04 
 6 -9 0 46.35 2.03 
 6 -9 0 45.75 2.02 
 -6 9 0 44.87 1.95 
 -6 9 0 46.22 2.02 
 6 9 0 45.86 1.92 
 -7 -9 0 4.55 0.71 
 -7 -9 0 4.25 0.46 
 -7 -9 0 3.41 0.55 
 7 -9 0 4.85 0.72 
 7 -9 0 4.34 0.82 
 7 -9 0 4.79 0.81 
 -7 9 0 2.76 0.79 
 -7 9 0 3.97 0.77 
 7 9 0 3.93 0.75 
 8 -9 0 3.03 0.77 
 8 -9 0 2.7 0.68 
 -8 -9 0 2.45 0.6 
 -8 -9 0 4.29 0.78 
 -8 9 0 3.58 0.86 
 8 9 0 3.17 0.77 
 -9 -9 0 0.39 0.63 
 9 -9 0 -0.23 0.61 
 -9 -9 0 0.82 0.55 
 -9 9 0 -0.82 0.59 
 -10 -9 0 2.72 0.71 
 -10 -9 0 2.93 0.87 
 10 -9 0 2.12 0.75 
 -10 9 0 2.25 0.87 
 -11 -9 0 1.1 0.68 
 11 -9 0 0.08 0.65 
 -11 -9 0 0.6 0.85 
 -11 9 0 0.82 0.9 
 -12 -9 0 14.78 1.42 
 -12 -9 0 14.47 1.65 
 -12 9 0 13.09 1.66 
 -13 -9 0 1.27 1.07 
 -13 -9 0 1.39 0.9 
 -13 9 0 1.39 1.04 
 0 -10 0 49.11 1.88 
 0 -10 0 50.68 1.75 
 0 10 0 51.54 2.04 
 0 10 0 52.45 1.65 
 1 -10 0 58.33 2.15 
 1 -10 0 63.84 2.08 
 -1 -10 0 59.87 2.21 
 -1 -10 0 63.34 1.95 
 1 10 0 62.09 2.31 
 -1 10 0 60.26 2.33 
 -1 10 0 59.42 2 
 2 -10 0 6.61 0.65 
 -2 -10 0 5.84 0.47 
 -2 -10 0 6.02 0.6 
 -2 -10 0 6.52 0.75 
 -2 10 0 6.06 0.6 
 -2 10 0 6.18 0.84 
 2 10 0 6.39 0.75 
 -3 -10 0 1.45 0.29 
 3 -10 0 1.05 0.43 
 3 -10 0 2.02 0.64 
 -3 -10 0 1.15 0.54 
 -3 -10 0 1.07 0.39 
 3 -10 0 1.37 0.46 
 3 10 0 1.51 0.55 
 -3 10 0 0.65 0.39 
 -4 -10 0 3.38 0.54 
 -4 -10 0 3.36 0.39 
 4 -10 0 5.17 0.61 
 4 -10 0 2.63 0.69 
 4 -10 0 3.54 0.63 
 -4 -10 0 5.66 0.8 
 -4 10 0 3.85 0.6 
 4 10 0 4.16 0.7 
 -4 10 0 2.84 0.61 
 5 -10 0 0.18 0.42 
 5 -10 0 0.2 0.49 
 -5 -10 0 0.62 0.62 
 -5 -10 0 0.63 0.38 
 -5 -10 0 0.2 0.39 
 -5 -10 0 0.58 0.33 
 5 -10 0 0.42 0.56 
 -5 10 0 0.75 0.54 
 -5 10 0 -0.15 0.18 
 5 10 0 0.3 0.47 
 6 -10 0 1.3 0.58 
 -6 -10 0 2.04 0.73 
 -6 -10 0 3.04 0.59 
 6 -10 0 2.52 0.7 
 -6 -10 0 2.79 0.46 
 6 -10 0 2.8 0.59 
 -6 -10 0 2.24 0.45 
 -6 10 0 2.79 0.6 
 -6 10 0 3.18 0.74 
 6 10 0 2.43 0.62 
 -7 -10 0 0.23 0.65 
 7 -10 0 0.02 0.58 
 -7 -10 0 -0.12 0.48 
 7 -10 0 -0.01 0.52 
 -7 -10 0 0.18 0.39 
 -7 -10 0 1.15 0.37 
 -7 10 0 0.49 0.67 
 7 10 0 0.02 0.55 
 -8 -10 0 0.34 0.58 
 8 -10 0 -0.01 0.57 
 -8 -10 0 -0.19 0.68 
 8 -10 0 0.43 0.66 
 -8 -10 0 -0.24 0.44 
 -8 10 0 0.45 0.62 
 8 10 0 -0.31 0.59 
 -9 -10 0 11.75 1.31 
 9 -10 0 14.48 1.33 
 -9 -10 0 13.61 1.1 
 -9 -10 0 11.9 1.19 
 9 -10 0 13.28 1.18 
 -9 10 0 13.94 1.47 
 9 10 0 12.44 1.29 
 -10 -10 0 2.45 0.85 
 -10 -10 0 1.89 0.7 
 10 -10 0 1.25 0.74 
 -10 10 0 0.33 0.9 
 11 -10 0 6.67 1.06 
 -11 -10 0 5.69 1.12 
 -11 -10 0 4.71 0.91 
 -11 10 0 6.38 1.18 
 -12 -10 0 5.81 1.19 
 -12 -10 0 3.73 0.92 
 -12 10 0 1.09 0.95 
 -13 -10 0 2.16 1.1 
 -13 -10 0 -0.15 1.07 
 -13 -10 0 0.49 0.85 
 -13 10 0 0.96 1.23 
 0 -11 0 0.74 0.36 
 0 -11 0 -0.16 0.38 
 0 11 0 0.53 0.56 
 1 -11 0 12.39 0.88 
 -1 -11 0 9.48 0.64 
 -1 -11 0 9.59 0.85 
 -1 11 0 10.79 1 
 -1 11 0 10.94 0.69 
 1 11 0 10.71 1.01 
 -2 -11 0 2.67 0.34 
 -2 -11 0 2.95 0.48 
 2 -11 0 3.15 0.55 
 -2 -11 0 3.42 0.62 
 -2 11 0 3.58 0.5 
 2 11 0 3.16 0.66 
 -2 11 0 3.09 0.73 
 3 -11 0 12.67 1.19 
 -3 -11 0 12.23 1.04 
 3 -11 0 10.04 0.85 
 -3 -11 0 11.61 0.82 
 3 -11 0 10.29 0.9 
 -3 -11 0 12.43 0.63 
 3 11 0 12.31 1.07 
 -3 11 0 12.73 1.15 
 -3 11 0 11.03 0.84 
 -4 -11 0 4.44 0.44 
 -4 -11 0 5.15 0.81 
 -4 -11 0 4.93 0.63 
 4 -11 0 5.09 0.74 
 4 -11 0 5.06 0.66 
 4 -11 0 3.75 0.79 
 4 11 0 4.56 0.72 
 -4 11 0 4.1 0.64 
 -4 11 0 3.83 0.68 
 -5 -11 0 1.74 0.37 
 5 -11 0 2.09 0.72 
 5 -11 0 1.37 0.56 
 -5 -11 0 1.33 0.47 
 5 -11 0 1.49 0.52 
 -5 -11 0 1.57 0.46 
 -5 -11 0 1.37 0.69 
 -5 11 0 1.9 0.54 
 5 11 0 1.45 0.57 
 -5 11 0 2.47 0.65 
 -6 -11 0 7.16 1.02 
 -6 -11 0 5.31 0.6 
 -6 -11 0 4.29 0.53 
 -6 -11 0 5.1 0.71 
 6 -11 0 5.75 0.76 
 6 -11 0 6.11 0.96 
 6 11 0 4.81 0.81 
 -6 11 0 4.32 0.82 
 -7 -11 0 1.07 0.42 
 -7 -11 0 1.02 0.79 
 -7 -11 0 0.63 0.43 
 7 -11 0 0.91 0.57 
 7 -11 0 1.32 0.72 
 -7 -11 0 1.29 0.56 
 -7 11 0 1.17 0.72 
 7 11 0 1.69 0.7 
 8 -11 0 0.78 0.76 
 -8 -11 0 1.08 0.57 
 -8 -11 0 1.21 0.52 
 -8 -11 0 0.79 0.83 
 8 -11 0 0 0.59 
 8 11 0 -0.27 0.63 
 -8 11 0 1.74 0.8 
 9 -11 0 1.63 0.82 
 -9 -11 0 3.22 0.67 
 -9 -11 0 2.21 0.77 
 -9 -11 0 4.22 1.04 
 9 -11 0 4.76 0.86 
 9 11 0 2.29 0.85 
 -9 11 0 2.42 0.95 
 -10 -11 0 2.9 0.89 
 -10 -11 0 2.46 0.98 
 10 -11 0 3.46 0.93 
 -10 -11 0 2.76 0.75 
 -10 11 0 3 0.97 
 -11 -11 0 0.41 0.68 
 11 -11 0 0.3 0.77 
 -11 -11 0 3.7 1.14 
 -11 -11 0 1.07 0.88 
 -11 11 0 0.2 0.86 
 -12 -11 0 4.25 1.25 
 -12 -11 0 4.52 1.16 
 -12 -11 0 2.11 0.83 
 -12 11 0 1.58 1.12 
 0 -12 0 1.26 0.48 
 0 12 0 1.09 0.61 
 1 -12 0 64.49 2.3 
 -1 -12 0 61.49 2.36 
 -1 12 0 59.56 2.48 
 1 12 0 63.48 2.47 
 -1 12 0 66.32 2.19 
 -2 -12 0 -0.26 0.46 
 2 -12 0 0.05 0.44 
 -2 -12 0 0.64 0.39 
 2 -12 0 -0.04 0.52 
 -2 -12 0 0.01 0.27 
 -2 12 0 0.05 0.5 
 2 12 0 -0.26 0.49 
 -2 12 0 0.13 0.33 
 -3 -12 0 3.59 0.39 
 -3 -12 0 3.62 0.75 
 -3 -12 0 3.61 0.57 
 3 -12 0 4.49 0.64 
 3 -12 0 2.43 0.69 
 3 12 0 3.83 0.72 
 -3 12 0 4.28 0.84 
 -3 12 0 4.64 0.61 
 -4 -12 0 2.28 0.36 
 4 -12 0 1.79 0.54 
 4 -12 0 3.04 0.79 
 -4 -12 0 2.17 0.72 
 4 -12 0 2.76 0.65 
 -4 -12 0 1.65 0.5 
 4 12 0 1.67 0.62 
 -4 12 0 1.95 0.59 
 -5 -12 0 12.86 1.2 
 -5 -12 0 14.59 0.99 
 -5 -12 0 12.46 0.93 
 5 -12 0 13.4 1.29 
 5 -12 0 14.53 1.05 
 -5 -12 0 14.84 0.79 
 5 -12 0 12.83 1.19 
 5 12 0 11.83 1.14 
 -5 12 0 15.46 1.15 
 6 -12 0 0.12 0.5 
 6 -12 0 0.37 0.67 
 -6 -12 0 0.45 0.41 
 -6 -12 0 -0.37 0.33 
 -6 -12 0 -0.58 0.67 
 -6 -12 0 -0.2 0.44 
 -6 12 0 -0.3 0.57 
 6 12 0 0.43 0.56 
 -7 -12 0 4.42 0.74 
 7 -12 0 3.98 0.75 
 -7 -12 0 3.7 0.55 
 -7 -12 0 4.11 0.58 
 -7 -12 0 1.63 0.81 
 7 -12 0 3.19 0.91 
 -7 12 0 3.09 0.8 
 7 12 0 2.05 0.69 
 -8 -12 0 1.26 0.64 
 -8 -12 0 0.9 0.86 
 8 -12 0 0.59 0.74 
 8 -12 0 0.84 0.66 
 -8 -12 0 1.31 0.5 
 8 12 0 1.24 0.73 
 -8 12 0 1.09 0.8 
 -9 -12 0 0.29 0.53 
 -9 -12 0 0.93 0.67 
 9 -12 0 -1.79 0.67 
 -9 -12 0 0.95 0.93 
 9 -12 0 -0.33 0.63 
 -9 12 0 -0.27 0.84 
 9 12 0 -0.88 0.67 
 -10 -12 0 -0.71 0.89 
 -10 -12 0 0.94 0.79 
 10 -12 0 -0.31 0.78 
 -10 -12 0 -1.26 0.51 
 -10 12 0 0.26 0.89 
 -11 -12 0 6.39 1.18 
 -11 -12 0 5.13 1.21 
 11 -12 0 4.5 1.08 
 -11 -12 0 6.58 0.95 
 -11 12 0 6.66 1.34 
 -12 -12 0 1.8 1.16 
 -12 -12 0 -1.22 0.89 
 -12 -12 0 0.93 0.75 
 -12 12 0 1.32 1.11 
 0 -13 0 0.98 0.51 
 0 13 0 0.83 0.6 
 -1 -13 0 5.54 0.77 
 1 -13 0 5.32 0.7 
 1 13 0 5.55 0.87 
 -1 13 0 2.79 0.75 
 -2 -13 0 16.21 0.83 
 -2 -13 0 17.03 1.22 
 2 -13 0 18.02 1.1 
 -2 -13 0 17.86 1 
 2 -13 0 19.61 1.43 
 2 13 0 17.27 1.23 
 -2 13 0 18.44 0.98 
 -2 13 0 16.15 1.31 
 3 -13 0 12.76 1.01 
 -3 -13 0 11.88 1.11 
 3 -13 0 8.6 1.06 
 -3 -13 0 12.13 0.89 
 -3 -13 0 13 0.68 
 -3 13 0 12.05 1.29 
 3 13 0 14.2 1.23 
 4 -13 0 1.57 0.55 
 -4 -13 0 0.96 0.68 
 -4 -13 0 1.69 0.35 
 -4 -13 0 0.65 0.47 
 4 -13 0 0.76 0.67 
 4 13 0 0.85 0.62 
 -4 13 0 1.2 0.73 
 -5 -13 0 4.98 0.71 
 -5 -13 0 5.01 0.5 
 -5 -13 0 5.95 0.98 
 5 -13 0 2.53 0.78 
 -5 -13 0 3.85 0.66 
 5 -13 0 4.17 0.71 
 5 13 0 5.31 0.86 
 -6 -13 0 2.35 0.46 
 6 -13 0 2.79 0.95 
 -6 -13 0 2.58 0.89 
 6 -13 0 2.36 0.67 
 -6 -13 0 1.09 0.55 
 -6 -13 0 2.74 0.61 
 -6 13 0 2.91 0.78 
 6 13 0 3.78 0.8 
 7 -13 0 4.52 0.83 
 7 -13 0 4.86 1.08 
 -7 -13 0 5.6 1.07 
 -7 -13 0 4.12 0.58 
 -7 -13 0 4.66 0.77 
 7 13 0 4.03 0.86 
 -7 13 0 5.12 0.99 
 8 -13 0 7.28 1.01 
 -8 -13 0 7.64 1.25 
 -8 -13 0 8.33 1.01 
 8 -13 0 8.05 1.25 
 -8 -13 0 8.66 0.82 
 8 13 0 7.93 1.16 
 -8 13 0 7.79 1.13 
 9 -13 0 2.8 0.99 
 9 -13 0 3.4 0.84 
 -9 -13 0 2.36 0.62 
 -9 -13 0 2.97 1.12 
 -9 -13 0 3.09 0.79 
 9 13 0 1.35 0.83 
 -9 13 0 4.12 1.06 
 10 -13 0 -0.93 0.76 
 -10 -13 0 1.18 0.82 
 10 -13 0 0.23 0.75 
 -10 -13 0 2.6 1.12 
 -10 -13 0 0.3 0.59 
 -10 13 0 -0.58 0.83 
 10 13 0 0.6 0.84 
 -11 -13 0 0.67 1.04 
 11 -13 0 1.21 0.93 
 -11 -13 0 1.39 0.72 
 -11 -13 0 2.5 0.91 
 -11 13 0 0.5 1.01 
 0 -14 0 -0.32 0.46 
 0 14 0 0.76 0.63 
 -1 -14 0 13.14 1.12 
 1 -14 0 14.28 1.14 
 -1 14 0 15.5 1.4 
 1 14 0 14.06 1.29 
 -2 -14 0 1.69 0.68 
 2 -14 0 2.67 0.76 
 2 -14 0 3.1 0.64 
 -2 -14 0 1.57 0.51 
 -2 14 0 3.22 0.78 
 2 14 0 1.38 0.66 
 -3 -14 0 1.87 0.37 
 -3 -14 0 1.94 0.71 
 3 -14 0 2.57 0.64 
 -3 -14 0 2.05 0.54 
 3 -14 0 1.97 0.73 
 -3 14 0 2.13 0.73 
 3 14 0 2.12 0.7 
 -4 -14 0 9.07 1.15 
 4 -14 0 9.09 1.21 
 -4 -14 0 9.72 0.64 
 4 -14 0 8.72 0.92 
 -4 -14 0 9.83 0.91 
 4 14 0 7.57 1.01 
 -4 14 0 6.71 1.07 
 -5 -14 0 30.35 1.83 
 -5 -14 0 26.87 1.43 
 5 -14 0 27.32 1.49 
 -5 -14 0 27.07 1.12 
 5 -14 0 22.7 1.7 
 -5 -14 0 29.31 1.45 
 -5 14 0 27.1 1.82 
 5 14 0 26.19 1.64 
 6 -14 0 0.52 0.6 
 -6 -14 0 0.28 0.83 
 -6 -14 0 0.27 0.37 
 -6 -14 0 1.71 0.59 
 -6 -14 0 0.9 0.55 
 6 -14 0 2.53 0.91 
 -6 14 0 1.18 0.74 
 6 14 0 1.34 0.68 
 -7 -14 0 0.6 0.55 
 7 -14 0 0.26 0.81 
 -7 -14 0 -0.31 0.85 
 7 -14 0 -0.25 0.61 
 -7 -14 0 0.29 0.41 
 7 14 0 0.29 0.7 
 -7 14 0 -1.34 0.62 
 -8 -14 0 1.6 0.96 
 -8 -14 0 1.25 0.67 
 8 -14 0 0.66 0.68 
 8 -14 0 -1.9 0.72 
 -8 -14 0 1.37 0.52 
 8 14 0 1.14 0.75 
 -8 14 0 -0.19 0.79 
 -9 -14 0 0.1 0.53 
 -9 -14 0 -1.18 0.87 
 9 -14 0 -0.44 0.7 
 9 -14 0 0.01 0.87 
 -9 -14 0 0.97 0.67 
 -9 14 0 0.21 0.88 
 9 14 0 0.76 0.83 
 -10 -14 0 7.92 0.93 
 -10 -14 0 10.84 1.59 
 -10 -14 0 6.57 1.13 
 10 -14 0 7.46 1.32 
 10 14 0 8.25 1.3 
 -10 14 0 7.51 1.3 
 11 -14 0 1.8 1 
 -11 -14 0 1.65 1.08 
 -11 -14 0 1.36 0.72 
 -11 14 0 3.58 1.09 
 0 -15 0 -0.39 0.52 
 0 15 0 -0.22 0.64 
 -1 -15 0 2.6 0.69 
 1 -15 0 0.72 0.57 
 1 15 0 1.76 0.78 
 -1 15 0 2.19 0.86 
 2 -15 0 4 0.97 
 -2 -15 0 5.41 0.9 
 -2 -15 0 5.1 0.67 
 2 -15 0 5.28 0.8 
 2 15 0 3.97 0.86 
 -2 15 0 3.59 0.89 
 -3 -15 0 -0.04 0.47 
 3 -15 0 0.9 0.56 
 -3 -15 0 -0.08 0.31 
 -3 -15 0 0.36 0.63 
 3 -15 0 -1.21 0.65 
 -3 15 0 2.04 0.83 
 3 15 0 0.9 0.65 
 4 -15 0 44.28 2.37 
 -4 -15 0 40.38 2.13 
 4 -15 0 45.15 1.95 
 -4 -15 0 41.66 1.82 
 -4 -15 0 42.77 1.49 
 4 15 0 39.25 2.05 
 -4 15 0 40.68 2.23 
 -5 -15 0 0.92 0.57 
 -5 -15 0 1.58 0.87 
 5 -15 0 0.32 0.85 
 -5 -15 0 0.65 0.61 
 5 -15 0 1.17 0.63 
 -5 -15 0 1.33 0.38 
 -5 15 0 1.48 0.88 
 5 15 0 1.28 0.71 
 -6 -15 0 12.52 0.8 
 -6 -15 0 11.98 1.37 
 6 -15 0 11.25 1.47 
 -6 -15 0 12.35 1.12 
 -6 -15 0 12.72 1.1 
 6 -15 0 12.4 1.18 
 6 15 0 10.04 1.22 
 -6 15 0 11.63 1.53 
 7 -15 0 4.28 0.87 
 7 -15 0 8.42 1.35 
 -7 -15 0 4.05 1.15 
 -7 -15 0 4.6 0.59 
 -7 -15 0 7.08 0.93 
 -7 15 0 6.23 1.07 
 7 15 0 4.03 0.94 
 -8 -15 0 1.49 0.71 
 -8 -15 0 1.3 1 
 8 -15 0 1.16 0.73 
 8 -15 0 1.14 0.95 
 -8 -15 0 0.61 0.51 
 8 15 0 0.78 0.76 
 -8 15 0 0.41 0.82 
 -9 -15 0 1.61 0.99 
 -9 -15 0 -0.33 0.49 
 9 -15 0 1.09 0.95 
 -9 15 0 0.44 0.9 
 9 15 0 0.88 0.84 
 10 -15 0 1.06 0.95 
 -10 -15 0 -0.01 1.02 
 -10 -15 0 0.18 0.61 
 -10 15 0 -1.15 0.86 
 10 15 0 0.34 0.9 
 0 -16 0 10.51 1.07 
 0 16 0 9.02 1.21 
 1 -16 0 2.52 0.7 
 1 -16 0 1.47 0.85 
 -1 -16 0 2.02 0.73 
 -1 -16 0 1.38 0.51 
 1 16 0 0.77 0.79 
 -1 16 0 1.43 0.83 
 -2 -16 0 19.34 1.2 
 2 -16 0 20.17 1.78 
 2 -16 0 23.48 1.44 
 -2 -16 0 19.59 1.45 
 -2 16 0 20.12 1.77 
 2 16 0 19.4 1.5 
 -3 -16 0 6.83 1.04 
 3 -16 0 8.29 0.98 
 -3 -16 0 7.37 0.83 
 3 -16 0 4.02 1.07 
 -3 16 0 8.48 1.26 
 3 16 0 7.3 1.09 
 -4 -16 0 1.46 0.38 
 4 -16 0 3.14 0.76 
 -4 -16 0 0.68 0.57 
 -4 -16 0 1.61 0.78 
 4 -16 0 3.6 1.05 
 4 16 0 1.46 0.74 
 -4 16 0 1.94 0.86 
 -5 -16 0 1.82 0.61 
 5 -16 0 2.31 1.03 
 5 -16 0 3.21 0.78 
 -5 -16 0 2.85 0.42 
 -5 -16 0 4.5 1.04 
 -5 -16 0 2.81 0.73 
 -5 16 0 2.67 1.02 
 5 16 0 2.55 0.85 
 6 -16 0 -0.21 0.62 
 -6 -16 0 -0.09 0.34 
 -6 -16 0 1.14 0.91 
 6 -16 0 -0.58 0.88 
 -6 16 0 -0.07 0.92 
 6 16 0 1.26 0.76 
 7 -16 0 4.37 1.24 
 7 -16 0 4.13 0.89 
 -7 -16 0 3.96 0.55 
 -7 -16 0 4.37 1.2 
 7 16 0 2.25 0.88 
 -7 16 0 4.76 1.24 
 -8 -16 0 3.66 0.58 
 -8 -16 0 4.8 1.26 
 8 -16 0 4.18 1.22 
 8 16 0 3.21 0.93 
 -9 -16 0 4.21 0.69 
 9 -16 0 5.69 1.25 
 -9 -16 0 3.99 1.29 
 9 16 0 3.71 1.15 
 -9 16 0 4.75 1.14 
 10 -16 0 3.76 1.2 
 -10 -16 0 4.49 0.76 
 -10 -16 0 5.09 1.38 
 10 16 0 3.51 1.16 
 -10 16 0 2.66 1.08 
 0 -17 0 0.35 0.67 
 0 17 0 0.83 0.82 
 1 -17 0 1.88 0.88 
 -1 -17 0 0.93 0.68 
 -1 -17 0 0.16 0.49 
 1 -17 0 0.7 0.65 
 1 17 0 -0.17 0.75 
 -1 17 0 1.58 0.85 
 2 -17 0 1.28 0.7 
 -2 -17 0 1.6 0.66 
 -2 -17 0 0.09 0.69 
 2 -17 0 -0.1 0.77 
 2 17 0 0.54 0.74 
 -2 17 0 0.34 0.82 
 3 -17 0 6.49 1.16 
 -3 -17 0 6.97 1.12 
 3 -17 0 5.66 0.93 
 -3 17 0 6.5 1.19 
 3 17 0 7.17 1.17 
 4 -17 0 2.85 1.09 
 -4 -17 0 3.97 1.01 
 4 -17 0 2.9 0.78 
 -4 17 0 2.3 1.03 
 4 17 0 2.15 0.82 
 5 -17 0 0.82 0.96 
 -5 -17 0 1.76 0.73 
 -5 -17 0 1 0.36 
 5 -17 0 1.42 0.76 
 -5 -17 0 0.55 0.84 
 5 17 0 0.34 0.78 
 -5 17 0 1.62 0.97 
 -6 -17 0 14.3 0.8 
 -6 -17 0 14.08 1.64 
 6 -17 0 13.09 1.24 
 6 -17 0 12.67 1.67 
 6 17 0 12.81 1.41 
 -6 17 0 12.91 1.69 
 -7 -17 0 -0.02 0.36 
 7 -17 0 -1.03 0.88 
 -7 -17 0 -1.19 0.91 
 -7 17 0 2.74 1.15 
 7 17 0 -0.61 0.71 
 -8 -17 0 10.7 1.59 
 8 -17 0 7.12 1.46 
 -8 -17 0 7.12 0.71 
 8 17 0 8.19 1.24 
 -8 17 0 7.83 1.57 
 -9 -17 0 -0.44 1.07 
 9 -17 0 -1.57 0.88 
 -9 -17 0 -0.08 0.48 
 9 17 0 0.98 0.98 
 0 -18 0 12.6 1.53 
 0 -18 0 15.96 1.42 
 0 18 0 14.89 1.58 
 1 -18 0 6.46 1.01 
 1 -18 0 6.2 1.13 
 -1 -18 0 8.01 1.12 
 -1 18 0 6.51 1.17 
 1 18 0 6.48 1.19 
 2 -18 0 0.7 0.84 
 -2 -18 0 -0.15 0.71 
 2 -18 0 0.31 0.69 
 -2 18 0 0.22 0.9 
 2 18 0 0.23 0.79 
 -3 -18 0 0.3 0.77 
 3 -18 0 -0.02 0.88 
 3 -18 0 -0.34 0.6 
 3 18 0 0.99 0.79 
 -3 18 0 -0.03 0.85 
 -4 -18 0 1.7 0.91 
 4 -18 0 1.97 0.99 
 4 -18 0 3.53 0.88 
 4 18 0 1.73 0.83 
 -4 18 0 1.85 1.06 
 5 -18 0 -0.3 0.74 
 -5 -18 0 0.66 0.92 
 5 -18 0 0.9 0.99 
 -5 18 0 -1.03 1 
 5 18 0 -0.14 0.75 
 -6 -18 0 -1.04 0.86 
 -6 -18 0 0.48 0.3 
 6 -18 0 0.47 0.91 
 6 18 0 0.55 0.82 
 -6 18 0 -1.12 0.92 
 -7 -18 0 2.66 1.19 
 -7 -18 0 4.59 0.49 
 7 -18 0 2.77 1.14 
 7 18 0 3.43 1.01 
 -7 18 0 2.26 1.22 
 8 -18 0 1.32 1.11 
 -8 -18 0 0.46 1.06 
 -8 -18 0 0.36 0.39 
 8 18 0 1.26 0.9 
 -8 18 0 0.55 1.16 
 0 -19 0 1.02 0.78 
 0 -19 0 -0.22 0.97 
 0 19 0 -0.8 0.8 
 -1 -19 0 0.47 1.02 
 1 -19 0 1.99 0.98 
 1 -19 0 1.25 0.76 
 -1 -19 0 -0.14 0.71 
 1 19 0 0.86 0.87 
 -1 19 0 0.26 0.87 
 2 -19 0 3.23 0.89 
 -2 -19 0 3.97 1.01 
 2 -19 0 1.31 0.96 
 2 19 0 3.59 1.06 
 -2 19 0 3.32 1.07 
 3 -19 0 0.81 0.77 
 3 -19 0 0.9 1.05 
 -3 -19 0 2.52 0.98 
 -3 19 0 0.75 1 
 3 19 0 1.07 0.85 
 -4 -19 0 1.27 0.96 
 4 -19 0 1.14 0.77 
 4 -19 0 2.33 1.13 
 -4 19 0 0.39 1.02 
 4 19 0 0.42 0.8 
 5 -19 0 4.88 1.33 
 -5 -19 0 6.61 1.29 
 -5 19 0 5.61 1.39 
 5 19 0 5.61 1.18 
 -6 -19 0 1.78 1.07 
 6 -19 0 5.73 1.29 
 6 19 0 2.57 0.99 
 -6 19 0 3.17 1.3 
 -7 -19 0 0.29 0.28 
 -7 -19 0 -0.53 0.91 
 7 -19 0 0.52 1.03 
 7 19 0 1.07 0.91 
 -7 19 0 1.12 1.08 
 0 -20 0 1.1 0.79 
 0 -20 0 0.28 0.89 
 0 20 0 -0.86 0.87 
 -1 -20 0 0.92 0.94 
 1 -20 0 1.14 0.81 
 1 -20 0 0.95 1.13 
 -1 -20 0 2.74 0.94 
 -1 20 0 0.25 0.97 
 1 20 0 2.59 1.05 
 -2 -20 0 0.94 1.1 
 2 -20 0 0.86 0.79 
 2 -20 0 1.21 1.05 
 -2 -20 0 1.93 0.92 
 2 20 0 1.13 0.97 
 -2 20 0 0.96 1.04 
 3 -20 0 6.08 1.38 
 3 -20 0 2.64 0.92 
 -3 -20 0 5.51 1.17 
 3 20 0 2 0.99 
 -3 20 0 3.27 1.31 
 4 -20 0 2.52 1.06 
 -4 -20 0 -1.01 0.86 
 -4 20 0 1.39 1.13 
 4 20 0 0.35 0.95 
 5 -20 0 0.51 1.1 
 -5 -20 0 -0.36 0.97 
 5 20 0 -0.16 0.79 
 -5 20 0 0.6 1.11 
 0 -21 0 0.24 1.12 
 0 -21 0 2.15 0.88 
 0 21 0 0.12 0.99 
 -1 -21 0 2.06 1.11 
 1 -21 0 -0.26 0.78 
 -1 -21 0 1.02 0.86 
 1 -21 0 -0.04 1.11 
 1 21 0 0.02 0.89 
 -1 21 0 0.77 1.03 
 2 -21 0 2.4 1.24 
 2 -21 0 3.76 0.96 
 -2 -21 0 1.64 1.14 
 -2 -21 0 2.73 1.03 
 -2 21 0 1.19 1.12 
 2 21 0 2.72 1.09 
 3 -21 0 2.79 1.22 
 -3 -21 0 5.06 1.22 
 -3 -21 0 0.41 1.06 
 -3 21 0 2.7 1.23 
 3 21 0 2.86 1.11 
 -4 -21 0 -1.04 0.79 
 4 -21 0 0.53 1.15 
 -4 -21 0 -1.46 0.9 
 -4 21 0 -0.1 1.15 
 4 21 0 0.49 0.91 
 -14 0 1 0.43 1.06 
 -14 0 1 1.3 1.18 
 -13 0 1 43.24 2.52 
 -13 0 1 42.33 2.64 
 -12 0 1 0.54 0.98 
 -12 0 1 1.57 0.91 
 -11 0 1 29.3 1.96 
 -11 0 1 27.09 1.84 
 -10 0 1 0.69 0.68 
 -10 0 1 0.13 0.65 
 -10 0 1 0.42 0.46 
 -9 0 1 2.41 0.52 
 -9 0 1 2.43 0.71 
 -9 0 1 2.88 0.38 
 -9 0 1 2.37 0.68 
 9 0 -1 2.19 0.38 
 -8 0 1 -0.27 0.23 
 8 0 -1 -0.02 0.25 
 -8 0 1 -0.36 0.47 
 -8 0 1 0.01 0.6 
 -8 0 1 0.08 0.39 
 -7 0 1 0.51 0.51 
 -7 0 1 0.71 0.49 
 -7 0 1 0.83 0.27 
 -7 0 1 0.35 0.36 
 7 0 -1 0.7 0.26 
 6 0 -1 -0.26 0.22 
 -6 0 1 0.19 0.23 
 -6 0 1 0.11 0.41 
 -6 0 1 0.17 0.33 
 -6 0 1 0.12 0.44 
 -5 0 1 0.11 0.4 
 -5 0 1 0.96 0.35 
 -5 0 1 0.5 0.22 
 -5 0 1 0.19 0.42 
 5 0 -1 0.52 0.23 
 5 0 -1 0.49 0.41 
 -4 0 1 0.09 0.18 
 4 0 -1 -0.11 0.37 
 4 0 -1 -0.07 0.19 
 4 0 -1 0.38 0.45 
 -4 0 1 0.15 0.35 
 -4 0 1 -0.04 0.41 
 -4 0 1 -0.14 0.37 
 3 0 -1 8.1 0.61 
 3 0 -1 8.08 0.61 
 -3 0 1 9.5 0.68 
 3 0 -1 8.29 0.35 
 -3 0 1 8.94 0.62 
 -3 0 1 7.9 0.35 
 -3 0 1 7.77 0.6 
 -2 0 1 0.08 0.22 
 -2 0 1 -0.29 0.21 
 -2 0 1 0.02 0.22 
 2 0 -1 0.16 0.27 
 2 0 -1 0.06 0.23 
 0 0 1 0.01 0.01 
 0 0 -1 -0.01 0.05 
 0 0 -1 -0.01 0.01 
 0 0 -1 0.1 0.07 
 0 0 1 0 0.03 
 0 0 1 0 0.01 
 0 0 1 -0.02 0.02 
 0 0 -1 -0.02 0.03 
 -1 0 -1 1.85 0.2 
 1 0 1 2.21 0.21 
 -1 0 -1 1.35 0.19 
 2 0 1 0.07 0.27 
 -2 0 -1 0.11 0.24 
 -2 0 -1 -0.17 0.21 
 -2 0 -1 0.15 0.27 
 2 0 1 0.36 0.23 
 2 0 1 -0.09 0.26 
 -3 0 -1 30.89 1.1 
 3 0 1 31.98 1.19 
 3 0 1 29.66 1.11 
 3 0 1 31.79 1.21 
 -3 0 -1 32.48 1.22 
 -3 0 -1 29.6 1.19 
 3 0 1 30.56 1.01 
 -4 0 -1 0.67 0.4 
 -4 0 -1 0.11 0.4 
 4 0 1 0.13 0.24 
 -4 0 -1 0.02 0.29 
 4 0 1 -0.07 0.42 
 4 0 1 -0.22 0.38 
 4 0 1 0.64 0.31 
 -5 0 -1 114.66 3.72 
 -5 0 -1 121.79 3.56 
 5 0 1 122.54 3.72 
 5 0 1 117.49 3.56 
 -5 0 -1 120.79 3.72 
 -6 0 -1 0.13 0.33 
 6 0 1 0.45 0.34 
 -6 0 -1 -0.25 0.42 
 -6 0 -1 -0.19 0.46 
 -7 0 -1 22.81 1.28 
 -7 0 -1 21.63 1.01 
 7 0 1 20.76 1.02 
 -7 0 -1 21.21 1.25 
 8 0 1 -0.51 0.33 
 -8 0 -1 -0.31 0.51 
 -8 0 -1 0.07 0.33 
 -8 0 -1 -0.49 0.47 
 -9 0 -1 0.48 0.67 
 9 0 1 0.43 0.4 
 -9 0 -1 0.86 0.59 
 10 0 1 -0.17 0.37 
 -10 0 -1 -0.19 0.62 
 -10 0 -1 -0.05 0.64 
 -11 0 -1 0.74 0.77 
 -11 0 -1 0.56 0.8 
 -12 0 -1 -0.07 0.8 
 -12 0 -1 0.27 0.87 
 -13 0 -1 1.28 0.94 
 -13 0 -1 -1.31 0.78 
 -14 0 -1 -1 0.9 
 -14 0 -1 0.16 1.14 
 -14 -1 1 0.91 1.01 
 -14 -1 1 -2.12 1.06 
 -14 1 1 1.37 1.18 
 -14 1 1 0.15 1.04 
 -13 -1 1 0.93 1.1 
 -13 -1 1 0.28 0.9 
 -13 1 1 1.09 0.96 
 -13 1 1 -0.78 0.86 
 -12 -1 1 0.31 0.82 
 -12 -1 1 0.45 0.85 
 -12 1 1 -1.12 0.76 
 -12 1 1 -0.48 0.81 
 -11 -1 1 2.52 1.01 
 -11 -1 1 2.86 0.85 
 -11 1 1 3.15 0.89 
 -11 1 1 2.32 0.96 
 -10 -1 1 6.57 0.99 
 -10 -1 1 3.53 0.85 
 -10 -1 1 5.01 0.64 
 10 -1 -1 5.81 0.57 
 -10 1 1 5.8 1.01 
 -10 1 1 3.97 0.97 
 9 -1 -1 7.22 0.58 
 -9 -1 1 8.18 0.71 
 -9 -1 1 8.22 0.54 
 -9 -1 1 6.19 0.94 
 -9 -1 1 7.78 0.94 
 -9 1 1 8.3 1.04 
 -9 1 1 7.71 0.77 
 -9 1 1 5.7 0.9 
 9 1 -1 6.51 0.52 
 -8 -1 1 0.33 0.37 
 8 -1 -1 0.3 0.3 
 -8 -1 1 0.38 0.51 
 -8 -1 1 0.24 0.24 
 -8 -1 1 -1.09 0.45 
 8 1 -1 0.14 0.25 
 -8 1 1 0.51 0.43 
 -8 1 1 -0.28 0.5 
 -8 1 1 0.87 0.62 
 -8 1 1 -0.15 0.27 
 -7 -1 1 61.78 2.41 
 -7 -1 1 63.9 2.12 
 -7 -1 1 65.63 1.95 
 7 -1 -1 60.09 2 
 -7 -1 1 60.82 2.32 
 -7 1 1 66.63 2.01 
 -7 1 1 64.5 2.19 
 -7 1 1 62.48 2.42 
 7 1 -1 63.3 2.12 
 7 1 -1 62.37 1.94 
 -7 1 1 62.59 2.38 
 -6 -1 1 10.8 0.92 
 -6 -1 1 9.86 0.5 
 -6 -1 1 9.28 0.66 
 -6 -1 1 10.25 0.84 
 6 -1 -1 8.78 0.57 
 -6 1 1 9.77 0.75 
 -6 1 1 9.14 0.54 
 -6 1 1 9.5 0.9 
 6 1 -1 10.85 0.68 
 -6 1 1 8.55 0.8 
 6 1 -1 9.5 0.5 
 -5 -1 1 88.94 2.51 
 5 -1 -1 85.51 2.58 
 5 -1 -1 87.57 2.84 
 -5 -1 1 88.3 2.8 
 -5 -1 1 85.64 2.87 
 -5 1 1 87.15 2.57 
 5 1 -1 87.25 2.51 
 -5 1 1 85.69 2.85 
 5 1 -1 88.09 2.66 
 -5 1 1 85.27 2.72 
 -5 1 1 88.36 2.88 
 4 -1 -1 0.6 0.25 
 -4 -1 1 0.48 0.43 
 4 -1 -1 0.47 0.42 
 -4 -1 1 -0.06 0.17 
 4 -1 -1 0.06 0.41 
 -4 -1 1 0.25 0.35 
 4 1 -1 -0.38 0.28 
 4 1 -1 -0.14 0.31 
 -4 1 1 0.57 0.38 
 -4 1 1 0.41 0.39 
 -4 1 1 0.08 0.34 
 -4 1 1 0.08 0.22 
 4 1 -1 0.13 0.17 
 -4 1 1 0.15 0.4 
 4 1 -1 0.27 0.39 
 3 -1 -1 3.54 0.3 
 -3 -1 1 3.16 0.44 
 3 -1 -1 3.2 0.44 
 -3 -1 1 3.03 0.23 
 3 -1 -1 2.99 0.47 
 -3 -1 1 3.6 0.39 
 3 -1 -1 2.66 0.41 
 -3 1 1 3.3 0.44 
 3 1 -1 2.28 0.2 
 3 1 -1 3.79 0.38 
 -3 1 1 3.25 0.45 
 3 1 -1 3.16 0.38 
 -3 1 1 4.53 0.49 
 -3 1 1 4.06 0.43 
 3 1 -1 2.91 0.44 
 2 -1 -1 1.43 0.28 
 -2 -1 1 1.69 0.32 
 2 -1 -1 1.11 0.29 
 -2 -1 1 0.45 0.17 
 2 -1 -1 1.86 0.31 
 -2 -1 1 1.33 0.24 
 2 1 -1 1.38 0.35 
 -2 1 1 1.36 0.26 
 2 1 -1 1.22 0.24 
 2 1 -1 1.56 0.24 
 -2 1 1 1.68 0.32 
 -2 1 1 1.33 0.28 
 -2 1 1 1.18 0.27 
 -2 -1 -1 5.39 0.39 
 -2 -1 -1 5.51 0.4 
 2 -1 1 5.53 0.44 
 2 -1 1 5.66 0.47 
 2 -1 1 5.41 0.44 
 -2 -1 -1 4.7 0.38 
 2 1 1 6.08 0.44 
 -2 1 -1 4.43 0.4 
 2 1 1 5.21 0.44 
 2 1 1 5.62 0.43 
 -2 1 -1 6.37 0.44 
 -2 1 -1 4.58 0.41 
 3 -1 1 6.92 0.58 
 3 -1 1 6.87 0.51 
 -3 -1 -1 7.07 0.52 
 -3 -1 -1 6.13 0.54 
 3 -1 1 7.73 0.58 
 -3 -1 -1 5.88 0.5 
 3 -1 1 6.39 0.49 
 3 1 1 7.02 0.55 
 -3 1 -1 7.79 0.6 
 -3 1 -1 7.39 0.55 
 -3 1 -1 7.07 0.62 
 3 1 1 6.41 0.52 
 3 1 1 7.57 0.56 
 4 -1 1 1.22 0.37 
 4 -1 1 1.53 0.47 
 4 -1 1 0.92 0.3 
 -4 -1 -1 1.11 0.33 
 4 -1 1 0.75 0.42 
 -4 -1 -1 0.79 0.4 
 -4 -1 -1 1.03 0.38 
 -4 1 -1 0.77 0.34 
 4 1 1 1.05 0.33 
 4 1 1 0.6 0.39 
 -4 1 -1 0.29 0.4 
 4 1 1 0.99 0.39 
 -4 1 -1 1.19 0.42 
 -5 -1 -1 45.69 1.71 
 5 -1 1 47.27 1.56 
 5 -1 1 44.8 1.59 
 -5 -1 -1 43.19 1.54 
 -5 -1 -1 43.35 1.69 
 5 -1 1 47.43 1.76 
 -5 1 -1 45.17 1.63 
 -5 1 -1 46.71 1.6 
 -5 1 -1 45.85 1.75 
 5 1 1 44.64 1.56 
 -5 1 -1 41.96 1.72 
 -6 -1 -1 20.55 1.13 
 -6 -1 -1 20.03 1.12 
 -6 -1 -1 20.98 0.92 
 6 -1 1 18.23 0.96 
 -6 1 -1 21.25 0.97 
 -6 1 -1 19.27 1.13 
 6 1 1 20.5 0.94 
 -6 1 -1 20.75 1.16 
 -7 -1 -1 0.2 0.34 
 7 -1 1 0.76 0.38 
 -7 -1 -1 0.26 0.48 
 -7 -1 -1 0.83 0.49 
 -7 1 -1 0.61 0.49 
 -7 1 -1 1.03 0.38 
 -7 1 -1 0.91 0.53 
 7 1 1 0.15 0.35 
 -8 -1 -1 -0.29 0.46 
 8 -1 1 0.21 0.36 
 -8 -1 -1 -0.13 0.52 
 -8 -1 -1 0.43 0.35 
 -8 1 -1 -0.41 0.5 
 -8 1 -1 0.36 0.52 
 -8 1 -1 -0.04 0.37 
 8 1 1 0.31 0.36 
 -9 -1 -1 0.54 0.44 
 9 -1 1 1.03 0.42 
 -9 -1 -1 -0.4 0.57 
 -9 -1 -1 0.12 0.54 
 9 1 1 0.42 0.4 
 -9 1 -1 -0.33 0.5 
 -9 1 -1 0.3 0.59 
 -10 -1 -1 8.79 1.1 
 10 -1 1 9.19 0.84 
 -10 -1 -1 11.61 1.26 
 -10 1 -1 11.24 1.19 
 -10 1 -1 11.03 1.26 
 10 1 1 10.67 0.81 
 -11 -1 -1 40.41 2.21 
 -11 -1 -1 43.32 2.34 
 -11 1 -1 43.28 2.27 
 -12 -1 -1 0.31 0.77 
 -12 -1 -1 1.7 1.01 
 -12 1 -1 0.68 0.85 
 -12 1 -1 0.77 0.97 
 -13 -1 -1 26.48 2.02 
 -13 -1 -1 22.98 2.01 
 -13 1 -1 25.99 2.06 
 -13 1 -1 26.98 2.26 
 -14 -1 -1 -0.27 0.97 
 -14 -1 -1 -0.7 1.07 
 -14 1 -1 0.5 0.95 
 -14 1 -1 -0.36 1.14 
 -14 -2 1 -0.18 0.99 
 -14 -2 1 1.45 1.1 
 -14 2 1 2.53 1.16 
 -14 2 1 1.25 1.03 
 -13 -2 1 13.06 1.58 
 -13 -2 1 17.76 1.89 
 -13 2 1 19.25 1.92 
 -13 2 1 16.02 1.82 
 -12 -2 1 6.96 1.29 
 -12 -2 1 5.18 1.05 
 -12 2 1 5.32 1.08 
 -12 2 1 5.96 1.18 
 -11 -2 1 2.26 0.85 
 -11 -2 1 1.21 0.8 
 -11 -2 1 0.94 0.47 
 -11 2 1 -0.05 0.81 
 -11 2 1 0.28 0.78 
 -10 -2 1 5.53 0.97 
 -10 -2 1 7.99 1.03 
 -10 -2 1 7.68 0.72 
 10 -2 -1 7.44 0.65 
 -10 2 1 9.01 1.14 
 -10 2 1 8.24 1.16 
 -9 -2 1 4.25 0.55 
 9 -2 -1 3.84 0.49 
 -9 -2 1 4.98 0.82 
 -9 -2 1 5.57 0.93 
 -9 -2 1 3.17 0.38 
 -9 2 1 3.5 0.81 
 -9 2 1 3.66 0.8 
 -9 2 1 3.42 0.65 
 -8 -2 1 2.42 0.33 
 8 -2 -1 2.38 0.41 
 -8 -2 1 1.82 0.42 
 -8 -2 1 1.82 0.57 
 -8 -2 1 2.22 0.66 
 8 2 -1 2.22 0.33 
 8 2 -1 2.47 0.45 
 -8 2 1 1.24 0.62 
 -8 2 1 1.59 0.52 
 -8 2 1 2.56 0.7 
 7 -2 -1 10.5 0.66 
 -7 -2 1 10.58 0.96 
 -7 -2 1 9.91 0.67 
 -7 -2 1 9.4 0.54 
 -7 -2 1 10.42 0.9 
 -7 2 1 10.36 0.92 
 7 2 -1 9.49 0.54 
 -7 2 1 10.66 0.87 
 -7 2 1 8.69 0.92 
 7 2 -1 10.04 0.68 
 -6 -2 1 7.64 0.83 
 -6 -2 1 7.27 0.45 
 6 -2 -1 7.3 0.57 
 -6 -2 1 9.44 0.8 
 6 2 -1 7.22 0.46 
 -6 2 1 8.4 0.72 
 -6 2 1 8.49 0.8 
 -6 2 1 7.37 0.81 
 6 2 -1 8.12 0.59 
 -5 -2 1 2.64 0.46 
 -5 -2 1 2.26 0.52 
 5 -2 -1 3.42 0.58 
 5 -2 -1 2.62 0.38 
 -5 -2 1 2.47 0.28 
 -5 2 1 1.88 0.49 
 -5 2 1 2.94 0.56 
 5 2 -1 2.89 0.38 
 -5 2 1 3.06 0.5 
 4 -2 -1 17.77 0.93 
 -4 -2 1 17.43 0.84 
 -4 -2 1 15.82 0.62 
 4 -2 -1 17.97 0.92 
 -4 -2 1 17.06 0.92 
 4 -2 -1 16.58 0.91 
 4 -2 -1 17.46 0.76 
 4 2 -1 18.04 0.97 
 -4 2 1 16.35 0.91 
 4 2 -1 16.74 0.82 
 -4 2 1 18.58 0.91 
 -4 2 1 17.5 0.89 
 -4 2 1 16.69 0.96 
 4 2 -1 17.92 0.75 
 -3 -2 1 49.5 1.46 
 3 -2 -1 48.38 1.56 
 -3 -2 1 48.41 1.53 
 -3 -2 1 50.64 1.7 
 -3 -2 1 48.84 1.58 
 3 -2 -1 48.41 1.66 
 3 -2 -1 51.82 1.71 
 3 -2 -1 49.07 1.67 
 3 2 -1 48.17 1.57 
 -3 2 1 47.43 1.7 
 -3 2 1 50.25 1.67 
 -3 2 1 48.75 1.67 
 -3 2 1 51.05 1.71 
 3 2 -1 50.37 1.69 
 3 2 -1 49.85 1.54 
 -2 -2 1 134.24 3.92 
 2 -2 -1 138.76 3.9 
 2 -2 -1 131.75 3.89 
 2 -2 -1 135.87 3.93 
 2 -2 -1 137.22 3.94 
 -2 -2 1 135.07 3.81 
 -2 -2 1 134.41 3.84 
 -2 2 1 135.09 3.93 
 -2 2 1 141.47 3.91 
 -2 2 1 136.35 3.94 
 2 2 -1 136.04 3.84 
 -2 2 1 136.1 3.9 
 2 2 -1 133.71 3.92 
 2 2 -1 138.52 3.81 
 1 -2 1 9.59 0.49 
 -1 -2 -1 10.13 0.49 
 1 -2 1 10.26 0.5 
 -1 -2 -1 10.56 0.44 
 -1 -2 -1 10.15 0.36 
 -1 -2 -1 8.6 0.46 
 1 2 1 9.53 0.45 
 1 2 1 9.56 0.52 
 -1 2 -1 10.12 0.49 
 -1 2 -1 9.92 0.37 
 -1 2 -1 10.92 0.54 
 1 2 1 10.67 0.41 
 1 2 1 10.3 0.52 
 2 -2 1 110.82 3.18 
 -2 -2 -1 106.71 3.11 
 -2 -2 -1 106.87 3.14 
 -2 -2 -1 110.45 3.13 
 2 -2 1 110.03 3.2 
 2 -2 1 107.07 3.07 
 2 -2 1 103.33 3.17 
 2 2 1 110.07 3.13 
 -2 2 -1 108.98 3.07 
 2 2 1 114.9 3.14 
 -2 2 -1 108.82 3.18 
 -2 2 -1 106.99 3.2 
 -2 2 -1 101.88 3.16 
 2 2 1 108.25 3.15 
 3 -2 1 47.22 1.66 
 3 -2 1 51.4 1.72 
 -3 -2 -1 50.33 1.61 
 3 -2 1 49.19 1.71 
 -3 -2 -1 48.99 1.64 
 3 -2 1 50.69 1.64 
 -3 -2 -1 49.18 1.64 
 -3 2 -1 46.85 1.7 
 3 2 1 50.29 1.62 
 -3 2 -1 49.29 1.65 
 3 2 1 51.21 1.66 
 3 2 1 51.86 1.64 
 -3 2 -1 46.44 1.68 
 -3 2 -1 49.8 1.59 
 -4 -2 -1 37.52 1.33 
 4 -2 1 38.89 1.38 
 -4 -2 -1 38.47 1.13 
 4 -2 1 37.26 1.51 
 -4 -2 -1 40.07 1.46 
 4 -2 1 38.91 1.48 
 4 -2 1 39.13 1.4 
 -4 -2 -1 36.87 1.42 
 -4 2 -1 36.77 1.49 
 4 2 1 36.63 1.45 
 4 2 1 35.14 1.34 
 -4 2 -1 37.69 1.37 
 4 2 1 40.79 1.44 
 -4 2 -1 37.31 1.48 
 4 2 1 38.84 1.14 
 -4 2 -1 38.17 1.39 
 5 -2 1 66.8 2.33 
 5 -2 1 64.38 2.15 
 -5 -2 -1 67.73 2.12 
 -5 -2 -1 64.61 2.24 
 -5 -2 -1 65.16 2.27 
 5 -2 1 63.52 2.18 
 -5 2 -1 65.93 2.3 
 -5 2 -1 68.41 2.2 
 -5 2 -1 68.51 2.18 
 5 2 1 64.17 2.12 
 -5 2 -1 64.98 2.34 
 5 2 1 65.95 1.94 
 -6 -2 -1 85.38 2.7 
 -6 -2 -1 86.02 2.9 
 -6 -2 -1 88.18 2.94 
 6 -2 1 86.9 2.79 
 6 -2 1 88.07 2.97 
 6 -2 1 90.24 2.79 
 -6 2 -1 83.07 2.94 
 6 2 1 88.68 2.56 
 6 2 1 84.97 2.72 
 -6 2 -1 82.96 2.95 
 -6 2 -1 90.96 2.79 
 -7 -2 -1 1.08 0.58 
 -7 -2 -1 1.09 0.36 
 7 -2 1 0.99 0.41 
 -7 -2 -1 1.04 0.49 
 -7 2 -1 0.71 0.52 
 -7 2 -1 0.33 0.51 
 -7 2 -1 0.5 0.37 
 7 2 1 0.99 0.29 
 7 2 1 0.35 0.34 
 8 -2 1 1.7 0.49 
 -8 -2 -1 3.02 0.68 
 -8 -2 -1 2.1 0.61 
 -8 -2 -1 2.09 0.42 
 8 2 1 1.56 0.42 
 -8 2 -1 1.65 0.67 
 -8 2 -1 1.76 0.58 
 8 2 1 1.87 0.33 
 -9 -2 -1 1.74 0.48 
 -9 -2 -1 1.69 0.66 
 9 -2 1 1.05 0.47 
 -9 -2 -1 1.96 0.75 
 -9 2 -1 2.21 0.71 
 9 2 1 1.54 0.44 
 -9 2 -1 1.97 0.69 
 10 -2 1 9.65 0.85 
 -10 -2 -1 7.15 1.13 
 -10 -2 -1 8.5 1.05 
 -10 2 -1 9.14 1.1 
 -10 2 -1 8.28 1.2 
 10 2 1 8.92 0.76 
 -11 -2 -1 4.2 0.97 
 -11 -2 -1 6.63 1.07 
 -11 2 -1 4.11 1 
 -11 2 -1 4.47 0.97 
 -12 -2 -1 3.49 1.11 
 -12 -2 -1 3.23 0.97 
 -12 2 -1 3.03 1.05 
 -12 2 -1 3.3 1.03 
 -13 -2 -1 -0.89 0.8 
 -13 -2 -1 1.18 1.07 
 -13 2 -1 -0.17 0.83 
 -13 2 -1 -0.46 1.02 
 -14 -2 -1 0.58 0.98 
 -14 -2 -1 0.58 1.01 
 -14 2 -1 1.98 1.21 
 -14 -3 1 0.8 0.98 
 -14 -3 1 -0.12 1.15 
 -14 3 1 0.3 1.14 
 -13 -3 1 0.4 1.02 
 -13 -3 1 0.27 0.87 
 -13 3 1 0.44 0.93 
 -13 3 1 0.27 0.92 
 -12 -3 1 5.45 1.22 
 -12 -3 1 4.32 1.05 
 -12 3 1 3.07 0.97 
 -12 3 1 4.8 1.13 
 -11 -3 1 9.89 1.22 
 -11 -3 1 8.87 1.3 
 -11 3 1 8.78 1.22 
 -11 3 1 9.26 1.22 
 -10 -3 1 0.67 0.71 
 -10 -3 1 0.23 0.37 
 10 -3 -1 0.08 0.38 
 -10 -3 1 -0.8 0.59 
 -10 3 1 -1.03 0.64 
 -10 3 1 0.61 0.66 
 -9 -3 1 7.43 0.54 
 -9 -3 1 8.15 0.67 
 -9 -3 1 9.22 1.12 
 9 -3 -1 7.81 0.71 
 -9 -3 1 7.96 0.94 
 -9 3 1 8.6 1.03 
 9 3 -1 8.83 0.77 
 -9 3 1 7.43 1.04 
 -8 -3 1 3.68 0.71 
 -8 -3 1 2.99 0.37 
 8 -3 -1 3.57 0.5 
 -8 -3 1 4.15 0.68 
 -8 -3 1 2.6 0.43 
 -8 3 1 2.13 0.68 
 8 3 -1 3.28 0.47 
 -8 3 1 3.07 0.68 
 -8 3 1 2.52 0.58 
 -7 -3 1 6.24 0.77 
 -7 -3 1 6.08 0.73 
 -7 -3 1 5.75 0.45 
 7 -3 -1 5.68 0.58 
 -7 3 1 5.75 0.78 
 -7 3 1 4.72 0.66 
 -7 3 1 5.43 0.79 
 7 3 -1 6.12 0.55 
 6 -3 -1 36.24 1.61 
 -6 -3 1 34.78 1.19 
 -6 -3 1 33.33 1.46 
 -6 -3 1 38.13 1.58 
 6 -3 -1 33.42 1.34 
 6 3 -1 36.23 1.28 
 -6 3 1 35.77 1.5 
 -6 3 1 36.52 1.61 
 -6 3 1 37.83 1.65 
 5 -3 -1 8.77 0.64 
 5 -3 -1 8.81 0.79 
 -5 -3 1 8.21 0.65 
 -5 -3 1 7.27 0.46 
 -5 -3 1 9.45 0.81 
 5 -3 -1 8.75 0.74 
 -5 3 1 8.73 0.83 
 -5 3 1 9.79 0.84 
 5 3 -1 8.24 0.55 
 -5 3 1 8.54 0.73 
 4 -3 -1 0.76 0.41 
 -4 -3 1 0.77 0.22 
 -4 -3 1 0.75 0.42 
 4 -3 -1 0.38 0.41 
 -4 -3 1 0.42 0.25 
 4 -3 -1 0.49 0.38 
 4 -3 -1 0.89 0.34 
 4 -3 -1 0.22 0.39 
 -4 -3 1 1.15 0.34 
 -4 3 1 1.18 0.46 
 -4 3 1 1.12 0.42 
 -4 3 1 0.71 0.4 
 -4 3 1 0.3 0.44 
 4 3 -1 0.57 0.4 
 4 3 -1 1.24 0.3 
 3 -3 -1 19.37 0.94 
 -3 -3 1 17.18 0.74 
 3 -3 -1 18.2 0.9 
 -3 -3 1 18.15 0.84 
 3 -3 -1 18.08 0.91 
 3 -3 -1 18.38 0.91 
 -3 -3 1 18.48 0.75 
 3 -3 -1 18.55 0.83 
 -3 3 1 17.5 0.89 
 -3 3 1 18.55 0.87 
 -3 3 1 18.13 0.92 
 3 3 -1 18.84 0.88 
 3 3 -1 17.61 0.73 
 3 3 -1 18.47 0.75 
 -3 3 1 19.34 0.89 
 2 -3 -1 3.29 0.45 
 -2 -3 1 3.6 0.36 
 2 -3 -1 3.58 0.44 
 -2 -3 1 2.92 0.24 
 2 -3 -1 4.05 0.42 
 -2 -3 1 2.67 0.37 
 2 -3 -1 2.94 0.39 
 -2 3 1 2.55 0.42 
 -2 3 1 3.45 0.41 
 2 3 -1 3.2 0.24 
 -2 3 1 3.02 0.42 
 -2 3 1 3.3 0.41 
 2 3 -1 3.63 0.35 
 2 3 -1 2.64 0.42 
 1 -3 -1 11.73 0.56 
 1 -3 -1 10.72 0.57 
 1 -3 -1 9.65 0.59 
 1 -3 -1 9.49 0.45 
 -1 3 1 11 0.57 
 -1 3 1 9.54 0.48 
 -1 3 1 11.03 0.61 
 0 -3 -1 18.32 0.55 
 0 -3 -1 16.83 0.71 
 0 -3 1 16.94 0.71 
 0 -3 -1 17.7 0.68 
 0 -3 -1 17.9 0.66 
 0 3 1 17.07 0.65 
 0 3 -1 17 0.64 
 0 3 -1 17.19 0.57 
 0 3 1 17.16 0.7 
 0 3 1 18.66 0.75 
 -1 -3 -1 187.72 5.24 
 -1 -3 -1 189.15 5.21 
 -1 -3 -1 181.88 5.25 
 1 -3 1 189.65 5.37 
 1 -3 1 190.38 5.21 
 1 -3 1 185.27 5.28 
 1 -3 1 191.57 5.33 
 -1 -3 -1 186.03 5.33 
 1 3 1 192.1 5.25 
 -1 3 -1 187.57 5.36 
 -1 3 -1 184.31 5.27 
 1 3 1 198.72 5.21 
 -1 3 -1 188.6 5.22 
 -1 3 -1 188.1 5.33 
 1 3 1 189.07 5.34 
 -2 -3 -1 3.94 0.42 
 2 -3 1 2.51 0.41 
 -2 -3 -1 3.49 0.32 
 2 -3 1 3.41 0.45 
 2 -3 1 4.16 0.33 
 -2 -3 -1 3.56 0.35 
 2 -3 1 3.01 0.39 
 -2 -3 -1 2.98 0.41 
 2 3 1 4.26 0.36 
 -2 3 -1 3.59 0.32 
 2 3 1 4.12 0.38 
 -2 3 -1 2.61 0.38 
 -2 3 -1 3.85 0.48 
 3 -3 1 1.15 0.32 
 3 -3 1 1.29 0.41 
 -3 -3 -1 1.13 0.3 
 3 -3 1 1.28 0.41 
 -3 -3 -1 0.5 0.3 
 -3 -3 -1 1.06 0.33 
 3 -3 1 1.43 0.41 
 -3 3 -1 0.98 0.37 
 -3 3 -1 1.35 0.37 
 3 3 1 1.29 0.38 
 -3 3 -1 0.95 0.3 
 3 3 1 1.15 0.36 
 -3 3 -1 1.38 0.46 
 3 3 1 1.22 0.35 
 -4 -3 -1 -0.24 0.27 
 4 -3 1 0.47 0.4 
 4 -3 1 0.6 0.38 
 -4 -3 -1 0.91 0.35 
 4 -3 1 0.36 0.43 
 -4 -3 -1 0.52 0.35 
 4 3 1 0.84 0.35 
 -4 3 -1 0.14 0.34 
 -4 3 -1 0.71 0.45 
 -4 3 -1 0.51 0.33 
 4 3 1 0.99 0.41 
 -4 3 -1 -0.11 0.4 
 -5 -3 -1 4.8 0.5 
 5 -3 1 4.26 0.6 
 -5 -3 -1 4.01 0.56 
 5 -3 1 4.53 0.56 
 5 -3 1 3.97 0.57 
 -5 -3 -1 4.79 0.58 
 -5 -3 -1 4.45 0.29 
 -5 3 -1 3.62 0.6 
 -5 3 -1 4.38 0.54 
 5 3 1 4.43 0.5 
 -5 3 -1 3.42 0.6 
 -5 3 -1 4.15 0.53 
 5 3 1 4.37 0.29 
 6 -3 1 7.39 0.78 
 -6 -3 -1 8.28 0.42 
 -6 -3 -1 9.59 0.78 
 6 -3 1 9.73 0.78 
 -6 -3 -1 7.89 0.62 
 -6 -3 -1 8.56 0.82 
 -6 3 -1 9.21 0.87 
 -6 3 -1 9.62 0.73 
 -6 3 -1 8.93 0.91 
 6 3 1 7.46 0.41 
 6 3 1 8.32 0.68 
 -7 -3 -1 5.31 0.73 
 -7 -3 -1 4.63 0.53 
 -7 -3 -1 4.29 0.65 
 7 -3 1 5.23 0.62 
 -7 3 -1 2.88 0.65 
 7 3 1 4.95 0.56 
 7 3 1 4.35 0.37 
 -7 3 -1 4.84 0.69 
 -8 -3 -1 20.37 1.27 
 8 -3 1 20.52 1.15 
 -8 -3 -1 21.8 1.37 
 -8 -3 -1 22.81 1.05 
 8 3 1 19.87 1.05 
 -8 3 -1 20.19 1.3 
 8 3 1 22.64 0.84 
 -8 3 -1 21.99 1.37 
 -9 -3 -1 19.26 1.4 
 -9 -3 -1 17.21 1.3 
 9 -3 1 16.91 1.08 
 9 3 1 18.11 1 
 -9 3 -1 15.2 1.25 
 -9 3 -1 18.47 1.36 
 -10 -3 -1 5.58 1.03 
 -10 -3 -1 5.89 0.94 
 10 -3 1 5.67 0.71 
 10 3 1 6.38 0.67 
 -10 3 -1 5.69 0.99 
 -10 3 -1 4.4 0.88 
 -11 -3 -1 33.68 2.06 
 -11 -3 -1 32.8 1.99 
 -11 3 -1 34.25 2.04 
 -11 3 -1 30.92 1.98 
 -12 -3 -1 6.77 1.14 
 -12 -3 -1 4.53 1.16 
 -12 3 -1 4.51 1.13 
 -12 3 -1 4.34 1.08 
 -13 -3 -1 4.38 1.27 
 -13 -3 -1 5.37 1.2 
 -13 3 -1 5.98 1.46 
 -13 3 -1 6.01 1.27 
 -14 -3 -1 1.3 1.01 
 -14 -3 -1 2.13 1.21 
 -14 3 -1 -0.59 1.11 
 -14 -4 1 1.76 1.1 
 -14 -4 1 0.12 0.97 
 -14 4 1 2.24 1.16 
 -13 -4 1 1.87 1.02 
 -13 -4 1 1.55 0.93 
 -13 4 1 1.16 0.97 
 -12 -4 1 6.94 1.26 
 -12 -4 1 5.27 1.05 
 -12 4 1 6.43 1.18 
 -12 4 1 5.33 1.21 
 -11 -4 1 -0.17 0.85 
 -11 -4 1 -1.05 0.63 
 -11 4 1 0.75 0.89 
 -11 4 1 1.14 0.8 
 -10 -4 1 18.12 0.94 
 -10 -4 1 19.06 1.39 
 -10 -4 1 19.24 1.59 
 10 -4 -1 17.27 1.05 
 -10 4 1 14.22 1.38 
 -10 4 1 15.73 1.51 
 -9 -4 1 4.33 0.45 
 9 -4 -1 4.96 0.62 
 -9 -4 1 4.59 0.9 
 -9 -4 1 4.21 0.5 
 -9 -4 1 4.83 0.77 
 -9 4 1 3.32 0.79 
 -9 4 1 2.74 0.77 
 -8 -4 1 16.3 1.27 
 -8 -4 1 17.01 0.77 
 8 -4 -1 15.81 0.97 
 -8 -4 1 17.75 1.15 
 -8 4 1 15.4 1.19 
 -8 4 1 18.23 1.34 
 8 4 -1 16.89 0.82 
 -7 -4 1 12.06 0.66 
 -7 -4 1 13.09 0.92 
 7 -4 -1 12.53 0.82 
 -7 -4 1 11.18 1 
 -7 4 1 13.44 1 
 -7 4 1 13.45 1.04 
 -7 4 1 15.2 1.18 
 7 4 -1 13.78 0.72 
 -6 -4 1 81.08 2.79 
 -6 -4 1 78.82 2.43 
 6 -4 -1 79.39 2.81 
 -6 -4 1 80.01 2.64 
 6 -4 -1 79.12 2.6 
 6 -4 -1 80.26 2.72 
 -6 4 1 78.34 2.82 
 -6 4 1 77.57 2.81 
 -6 4 1 84.33 2.76 
 6 4 -1 81.74 2.46 
 -5 -4 1 0.26 0.25 
 -5 -4 1 0.42 0.23 
 5 -4 -1 0.69 0.37 
 -5 -4 1 0.33 0.35 
 5 -4 -1 0.86 0.44 
 -5 -4 1 0.44 0.44 
 5 -4 -1 0.39 0.46 
 -5 4 1 -0.09 0.45 
 -5 4 1 -0.1 0.44 
 5 4 -1 0.72 0.46 
 5 4 -1 0.31 0.28 
 -5 4 1 0.28 0.44 
 -4 -4 1 8.33 0.51 
 -4 -4 1 7.37 0.52 
 4 -4 -1 8.28 0.68 
 -4 -4 1 7.78 0.57 
 4 -4 -1 9.69 0.73 
 4 -4 -1 7.5 0.69 
 4 -4 -1 8.16 0.77 
 -4 -4 1 7.14 0.67 
 -4 4 1 8.05 0.73 
 -4 4 1 9.3 0.72 
 -4 4 1 9.67 0.78 
 4 4 -1 6.99 0.51 
 -4 4 1 7.2 0.69 
 4 4 -1 8.57 0.74 
 -3 -4 1 13.52 0.65 
 -3 -4 1 14.7 0.77 
 3 -4 -1 14.34 0.86 
 3 -4 -1 14.87 0.78 
 3 -4 -1 14.49 0.87 
 -3 -4 1 14.04 0.62 
 3 -4 -1 13.78 0.79 
 -3 4 1 14.11 0.78 
 -3 4 1 12.36 0.79 
 3 4 -1 12.91 0.57 
 -3 4 1 12.19 0.8 
 -3 4 1 13.44 0.86 
 2 -4 -1 6.82 0.59 
 -2 -4 1 8.2 0.36 
 2 -4 -1 8.67 0.67 
 2 -4 -1 6.92 0.53 
 2 -4 -1 7.08 0.55 
 -2 -4 1 7.82 0.51 
 -2 -4 1 8.47 0.54 
 -2 4 1 7.74 0.59 
 2 4 -1 7.97 0.6 
 -2 4 1 6.75 0.55 
 -2 4 1 6.44 0.57 
 -2 4 1 7.32 0.61 
 1 -4 -1 20.43 0.91 
 1 -4 -1 22.24 0.9 
 -1 -4 1 23.49 0.88 
 1 -4 -1 22 0.79 
 1 -4 -1 22.45 0.9 
 -1 4 1 24.13 0.9 
 -1 4 1 21.74 0.88 
 -1 4 1 21.35 0.91 
 -1 4 1 21.55 0.82 
 0 -4 -1 0.41 0.22 
 0 -4 -1 1.01 0.19 
 0 -4 -1 0.65 0.33 
 0 -4 1 1.32 0.25 
 0 -4 1 0.66 0.17 
 0 -4 -1 1.14 0.3 
 0 4 -1 1.09 0.28 
 0 4 1 0.19 0.21 
 0 4 -1 1.11 0.19 
 0 4 -1 0.98 0.2 
 0 4 1 0.5 0.34 
 -1 -4 -1 5.2 0.42 
 1 -4 1 6.21 0.57 
 -1 -4 -1 6.13 0.37 
 -1 -4 -1 6 0.42 
 -1 -4 -1 5.48 0.49 
 1 -4 1 5.69 0.45 
 1 -4 1 6.42 0.48 
 1 -4 1 5.78 0.39 
 1 4 1 6.05 0.41 
 1 4 1 6.78 0.56 
 -1 4 -1 6.05 0.46 
 -1 4 -1 5.55 0.44 
 2 -4 1 55.7 1.71 
 -2 -4 -1 56.34 1.88 
 -2 -4 -1 55.69 1.73 
 -2 -4 -1 56.67 1.86 
 2 -4 1 57.77 1.93 
 2 -4 1 56.62 1.87 
 2 -4 1 54.39 1.83 
 -2 -4 -1 54.49 1.73 
 -2 4 -1 57.78 1.87 
 -2 4 -1 55.85 1.91 
 2 4 1 57.79 1.73 
 2 4 1 56.32 1.74 
 -2 4 -1 56.31 1.72 
 -3 -4 -1 6.73 0.49 
 -3 -4 -1 6.97 0.57 
 -3 -4 -1 6.9 0.52 
 3 -4 1 7.03 0.63 
 3 -4 1 7 0.66 
 3 -4 1 6.51 0.49 
 -3 -4 -1 6.5 0.36 
 3 -4 1 6.35 0.56 
 -3 4 -1 7.12 0.63 
 3 4 1 7.24 0.57 
 -3 4 -1 6.65 0.59 
 3 4 1 6.89 0.5 
 -3 4 -1 7.13 0.63 
 -3 4 -1 7.9 0.53 
 4 -4 1 107.08 3.35 
 4 -4 1 102.76 3.31 
 -4 -4 -1 106.19 2.96 
 4 -4 1 106.22 3.2 
 4 -4 1 107.87 3.32 
 -4 -4 -1 105.45 3.22 
 -4 -4 -1 108.44 3.26 
 -4 -4 -1 106.9 3.23 
 -4 4 -1 104.05 3.34 
 -4 4 -1 106.61 3.38 
 -4 4 -1 103.68 3.3 
 -4 4 -1 106.3 3.19 
 4 4 1 110.02 3.29 
 -5 -4 -1 0.96 0.42 
 -5 -4 -1 0.1 0.31 
 5 -4 1 0.64 0.42 
 -5 -4 -1 0.49 0.38 
 5 -4 1 0.82 0.49 
 -5 4 -1 0.43 0.42 
 -5 4 -1 0.9 0.49 
 -5 4 -1 0.08 0.45 
 -5 4 -1 0.62 0.36 
 5 4 1 0.64 0.36 
 6 -4 1 109.42 3.58 
 -6 -4 -1 106.01 3.42 
 -6 -4 -1 107.4 3.47 
 6 -4 1 100.29 3.41 
 -6 -4 -1 108.97 3.31 
 -6 4 -1 108.53 3.59 
 6 4 1 107.12 3.33 
 -6 4 -1 110.01 3.56 
 -7 -4 -1 1.11 0.51 
 -7 -4 -1 0.64 0.49 
 -7 -4 -1 0.27 0.34 
 7 -4 1 0.24 0.47 
 -7 4 -1 0.07 0.59 
 -7 4 -1 0.77 0.57 
 7 4 1 0.82 0.2 
 7 4 1 0.31 0.37 
 8 -4 1 16.23 1.04 
 -8 -4 -1 15.41 0.9 
 -8 -4 -1 15.6 1.14 
 -8 -4 -1 14.44 1.13 
 8 4 1 15.39 0.93 
 8 4 1 15.64 0.62 
 -8 4 -1 16.97 1.26 
 -8 4 -1 18.34 1.28 
 -9 -4 -1 1.39 0.65 
 9 -4 1 2.13 0.58 
 -9 -4 -1 1.95 0.65 
 9 4 1 2.11 0.49 
 -9 4 -1 2.06 0.75 
 -9 4 -1 0.64 0.67 
 -10 -4 -1 4.86 0.88 
 -10 -4 -1 5.74 1.02 
 10 -4 1 5.47 0.78 
 -10 4 -1 4.55 0.94 
 -10 4 -1 6.92 1.07 
 -11 -4 -1 2.03 0.91 
 11 -4 1 1.11 0.58 
 -11 -4 -1 0.95 0.74 
 -11 4 -1 2.64 0.91 
 -11 4 -1 1.42 0.81 
 -12 -4 -1 16.52 1.58 
 -12 -4 -1 13.89 1.51 
 -12 4 -1 12.99 1.55 
 -12 4 -1 14.32 1.61 
 -13 -4 -1 0.59 0.86 
 -13 -4 -1 1.23 1.07 
 -13 4 -1 0.03 0.95 
 -14 -4 -1 1.25 1.2 
 -14 -4 -1 -0.69 0.89 
 -14 4 -1 0.08 0.99 
 -14 -5 1 4.5 1.17 
 -14 -5 1 6.01 1.47 
 -14 5 1 3.62 1.36 
 -13 -5 1 0.2 0.86 
 -13 -5 1 0.31 1 
 -13 5 1 -0.85 0.88 
 -12 -5 1 0.47 0.77 
 -12 -5 1 0.63 0.85 
 -12 5 1 0.53 1 
 -12 5 1 1.15 1.35 
 -11 -5 1 2.65 0.81 
 -11 -5 1 1.43 0.95 
 -11 5 1 2.32 0.87 
 -11 5 1 3.2 1.06 
 -10 -5 1 10.55 0.94 
 -10 -5 1 10.23 1.11 
 -10 -5 1 11.77 1.33 
 10 -5 -1 9.09 0.87 
 -10 5 1 9.74 1.22 
 -10 5 1 10.22 1.29 
 -9 -5 1 17.45 0.87 
 -9 -5 1 17.08 1.31 
 -9 -5 1 18.46 1.25 
 9 -5 -1 17 1.09 
 -9 5 1 18.53 1.44 
 -9 5 1 17.52 1.36 
 -8 -5 1 63.96 2.11 
 -8 -5 1 65.48 2.6 
 8 -5 -1 63.81 2.34 
 -8 -5 1 65.49 2.43 
 -8 5 1 67.46 2.63 
 8 5 -1 67.17 2.12 
 -8 5 1 66.58 2.65 
 7 -5 -1 46.23 1.79 
 7 -5 -1 45.2 1.9 
 -7 -5 1 46.85 1.99 
 -7 -5 1 47.08 1.82 
 -7 -5 1 46.27 1.6 
 7 5 -1 46.74 1.58 
 -7 5 1 45.25 1.98 
 -7 5 1 49.5 2.07 
 6 -5 -1 62.11 2.3 
 -6 -5 1 57.53 2.02 
 6 -5 -1 58.21 2.09 
 6 -5 -1 57.83 2.14 
 -6 -5 1 56.59 1.86 
 -6 -5 1 58.3 2.21 
 -6 -5 1 57.93 1.91 
 -6 5 1 56.12 2.2 
 6 5 -1 60.02 1.88 
 6 5 -1 58.7 2.2 
 -6 5 1 58.45 2.23 
 -5 -5 1 9.56 0.75 
 5 -5 -1 10.54 0.9 
 -5 -5 1 9.36 0.58 
 -5 -5 1 10 0.68 
 5 -5 -1 9.29 0.78 
 5 -5 -1 11.41 0.82 
 -5 -5 1 8.35 0.57 
 5 5 -1 8.99 0.58 
 -5 5 1 9.36 0.81 
 5 5 -1 12.78 0.97 
 -5 5 1 10.89 0.9 
 4 -5 -1 2.37 0.49 
 4 -5 -1 1.85 0.45 
 -4 -5 1 2.36 0.35 
 4 -5 -1 3.19 0.56 
 -4 -5 1 1.97 0.43 
 -4 -5 1 2.53 0.38 
 -4 5 1 2.55 0.5 
 4 5 -1 2.51 0.58 
 -4 5 1 2.13 0.49 
 -4 5 1 1.87 0.46 
 -4 5 1 3.31 0.52 
 -3 -5 1 1.79 0.37 
 -3 -5 1 1.17 0.33 
 3 -5 -1 1.43 0.42 
 -3 -5 1 2.09 0.28 
 3 -5 -1 2.1 0.43 
 3 -5 -1 1.65 0.42 
 3 5 -1 2.13 0.23 
 -3 5 1 1.53 0.42 
 -3 5 1 1.61 0.44 
 -3 5 1 2.54 0.45 
 3 5 -1 2.29 0.45 
 2 -5 -1 10.01 0.62 
 2 -5 -1 11.99 0.7 
 -2 -5 1 10.22 0.4 
 2 -5 -1 10.44 0.74 
 -2 -5 1 10.33 0.63 
 2 -5 -1 10.09 0.77 
 -2 5 1 11.42 0.69 
 -2 5 1 11.61 0.76 
 -2 5 1 10.93 0.66 
 1 -5 -1 81.41 2.38 
 1 -5 -1 82.11 2.49 
 -1 -5 1 79.94 2.24 
 1 -5 -1 78.1 2.52 
 -1 -5 1 82.39 2.48 
 1 -5 -1 80.5 2.48 
 -1 5 1 81 2.46 
 -1 5 1 79.21 2.39 
 -1 5 1 79.01 2.45 
 -1 5 1 82.62 2.51 
 0 -5 -1 59.47 1.76 
 0 -5 -1 58.29 1.91 
 0 -5 -1 57.29 1.83 
 0 -5 -1 59.08 1.93 
 0 -5 1 60.85 1.76 
 0 -5 1 58.34 1.84 
 0 5 -1 58.91 1.73 
 0 5 1 59.87 1.95 
 0 5 -1 61.43 1.87 
 0 5 1 59.61 1.82 
 0 5 -1 60.61 1.74 
 -1 -5 -1 -0.16 0.22 
 -1 -5 -1 -0.29 0.37 
 1 -5 1 0.3 0.39 
 1 -5 1 0.13 0.27 
 1 -5 1 0.27 0.29 
 -1 -5 -1 0.09 0.22 
 1 -5 1 0.51 0.25 
 1 5 1 0.45 0.23 
 -1 5 -1 0.53 0.28 
 -1 5 -1 0.1 0.29 
 1 5 1 0 0.37 
 -2 -5 -1 3.92 0.55 
 -2 -5 -1 2.52 0.33 
 2 -5 1 2.75 0.47 
 2 -5 1 3.75 0.48 
 2 -5 1 3.55 0.48 
 -2 -5 -1 3.05 0.34 
 2 -5 1 3.77 0.35 
 -2 5 -1 3.12 0.5 
 -2 5 -1 3.26 0.43 
 2 5 1 3.13 0.37 
 -2 5 -1 3.53 0.38 
 2 5 1 3.44 0.34 
 3 -5 1 15.52 0.74 
 3 -5 1 15.29 0.88 
 -3 -5 -1 13.82 0.82 
 -3 -5 -1 13.86 0.71 
 -3 -5 -1 14.06 0.92 
 3 -5 1 15.25 0.91 
 -3 -5 -1 15.9 0.74 
 3 -5 1 13.85 0.93 
 3 5 1 14.67 0.78 
 -3 5 -1 16.07 0.74 
 -3 5 -1 15.52 0.88 
 -4 -5 -1 5.51 0.54 
 -4 -5 -1 5.25 0.35 
 4 -5 1 5.89 0.53 
 4 -5 1 6.13 0.68 
 4 -5 1 5.99 0.68 
 -4 -5 -1 5.37 0.54 
 -4 -5 -1 4.49 0.49 
 -4 5 -1 5.91 0.68 
 -4 5 -1 6.08 0.53 
 -4 5 -1 5.07 0.63 
 4 5 1 5.33 0.58 
 -5 -5 -1 22.83 1.11 
 5 -5 1 23.28 1.17 
 5 -5 1 24.68 1.25 
 5 -5 1 22.83 1.06 
 -5 -5 -1 20.47 1.02 
 -5 -5 -1 23.02 1.08 
 -5 5 -1 23.04 1.04 
 -5 5 -1 21.07 1.19 
 -5 5 -1 23.91 1.22 
 6 -5 1 0.64 0.5 
 -6 -5 -1 -0.3 0.31 
 -6 -5 -1 0.07 0.39 
 -6 -5 -1 0.43 0.43 
 6 -5 1 0.25 0.43 
 -6 5 -1 -0.22 0.54 
 -6 5 -1 0.8 0.51 
 7 -5 1 2.74 0.59 
 -7 -5 -1 2.82 0.58 
 7 -5 1 2.7 0.66 
 -7 -5 -1 3.11 0.59 
 -7 5 -1 3.06 0.7 
 -7 5 -1 2.56 0.67 
 8 -5 1 6 0.78 
 -8 -5 -1 5.18 0.75 
 -8 -5 -1 6.53 0.83 
 -8 5 -1 4.36 0.8 
 -8 5 -1 5.22 0.93 
 -9 -5 -1 20.47 1.36 
 9 -5 1 19.85 1.24 
 -9 -5 -1 20.26 1.44 
 -9 5 -1 19.01 1.43 
 -9 5 -1 19.12 1.45 
 -10 -5 -1 18.6 1.53 
 10 -5 1 16.33 1.2 
 -10 -5 -1 18.27 1.44 
 -10 5 -1 15.7 1.45 
 -10 5 -1 19.57 1.7 
 -11 -5 -1 3.43 0.93 
 -11 -5 -1 2.44 0.89 
 11 -5 1 4.57 0.76 
 -11 5 -1 4.87 1 
 -11 5 -1 1.82 1.01 
 -12 -5 -1 12.12 1.53 
 -12 -5 -1 12.95 1.41 
 -12 5 -1 9.66 1.4 
 -13 -5 -1 -1 0.78 
 -13 -5 -1 1.05 0.89 
 -13 5 -1 -0.01 1.01 
 -14 -5 -1 -0.21 0.89 
 -14 -5 -1 2.72 1.26 
 -14 5 -1 -1.89 1.02 
 -14 -6 1 3.04 1.08 
 -14 -6 1 2.23 1.28 
 -14 6 1 1.48 1.25 
 -13 -6 1 0.32 0.84 
 -13 -6 1 1.69 1.1 
 -13 6 1 1.53 1.11 
 -12 -6 1 13.84 1.6 
 -12 -6 1 13.4 1.4 
 -12 6 1 12.7 1.56 
 -11 -6 1 16.65 1.6 
 -11 -6 1 16.54 1.4 
 -11 6 1 16.99 1.67 
 -11 6 1 16.45 1.64 
 -10 -6 1 3.31 0.94 
 -10 -6 1 3.27 0.75 
 10 -6 -1 2.96 0.64 
 -10 6 1 2.41 0.79 
 -10 6 1 2.82 0.88 
 -9 -6 1 3.08 0.66 
 9 -6 -1 2 0.59 
 -9 -6 1 3.95 0.87 
 -9 6 1 3.52 0.81 
 -9 6 1 1.45 0.73 
 8 -6 -1 7.7 0.83 
 -8 -6 1 6.35 0.87 
 -8 -6 1 6.93 0.6 
 -8 -6 1 6.93 0.76 
 -8 6 1 6.05 0.89 
 8 6 -1 7.14 0.54 
 -8 6 1 8.53 1.08 
 7 -6 -1 4 0.76 
 -7 -6 1 4.55 0.5 
 -7 -6 1 4.46 0.6 
 7 -6 -1 3.6 0.66 
 7 -6 -1 4.59 0.66 
 -7 -6 1 6.32 0.81 
 7 6 -1 5.78 0.78 
 -7 6 1 4.55 0.77 
 -7 6 1 5.75 0.83 
 -6 -6 1 25.46 1.15 
 6 -6 -1 26.5 1.32 
 6 -6 -1 28.1 1.44 
 -6 -6 1 24.11 1.26 
 -6 -6 1 25.5 1.01 
 -6 -6 1 24.87 1.07 
 6 -6 -1 27.95 1.31 
 -6 6 1 25.65 1.39 
 6 6 -1 26.58 1.34 
 -6 6 1 23.47 1.38 
 5 -6 -1 22.86 1.16 
 -5 -6 1 21.88 0.93 
 -5 -6 1 21.65 0.96 
 -5 -6 1 21.9 0.97 
 5 -6 -1 19.24 1.12 
 -5 -6 1 23.79 1.15 
 5 -6 -1 22.23 1.2 
 -5 6 1 22.32 1.21 
 5 6 -1 22.71 1.18 
 -5 6 1 21.42 1.19 
 4 -6 -1 7.87 0.73 
 4 -6 -1 10.27 0.84 
 -4 -6 1 9.65 0.71 
 -4 -6 1 8.77 0.62 
 4 -6 -1 9.7 0.76 
 -4 -6 1 9.08 0.57 
 -4 6 1 10.83 0.82 
 -4 6 1 8.23 0.75 
 4 6 -1 9.57 0.81 
 -3 -6 1 1.09 0.35 
 -3 -6 1 1.4 0.38 
 3 -6 -1 0.18 0.36 
 3 -6 -1 0.47 0.39 
 -3 -6 1 0.65 0.22 
 3 -6 -1 0.62 0.39 
 -3 6 1 0.98 0.4 
 -3 6 1 -0.03 0.36 
 -3 6 1 0.04 0.22 
 2 -6 -1 3.88 0.49 
 -2 -6 1 3.86 0.46 
 -2 -6 1 3.29 0.48 
 -2 -6 1 3.94 0.25 
 2 -6 -1 2.93 0.41 
 -2 6 1 4.04 0.53 
 -2 6 1 3.19 0.5 
 -2 6 1 4.09 0.46 
 -2 6 1 4.15 0.49 
 1 -6 -1 11.78 0.79 
 1 -6 -1 11.54 0.58 
 1 -6 -1 11.64 0.72 
 -1 -6 1 12.73 0.74 
 1 -6 -1 13.07 0.75 
 -1 -6 1 11.68 0.45 
 -1 6 1 12.71 0.8 
 -1 6 1 12.71 0.67 
 -1 6 1 10.92 0.67 
 0 -6 -1 43.2 1.56 
 0 -6 -1 43.76 1.46 
 0 -6 1 44.01 1.49 
 0 -6 -1 43.52 1.38 
 0 -6 1 44.87 1.39 
 0 -6 -1 45.31 1.59 
 0 6 1 43.56 1.46 
 0 6 -1 45.49 1.35 
 0 6 1 44.82 1.6 
 0 6 -1 44.94 1.52 
 0 6 -1 43.94 1.35 
 0 6 1 42.79 1.43 
 1 -6 1 0.52 0.27 
 1 -6 1 0.55 0.31 
 1 -6 1 0.52 0.42 
 -1 -6 -1 0.58 0.41 
 -1 -6 -1 0.45 0.25 
 -1 -6 -1 0.33 0.24 
 1 -6 1 0.25 0.29 
 -1 6 -1 0.4 0.28 
 1 6 1 0.44 0.42 
 1 6 1 0.54 0.22 
 -1 6 -1 0.49 0.33 
 -2 -6 -1 5.51 0.44 
 2 -6 1 5.42 0.43 
 -2 -6 -1 4.76 0.63 
 -2 -6 -1 5.64 0.42 
 2 -6 1 5.21 0.51 
 2 -6 1 5.29 0.55 
 2 -6 1 5.16 0.61 
 -2 6 -1 5.18 0.48 
 -2 6 -1 5.4 0.51 
 -2 6 -1 4.78 0.54 
 3 -6 1 0.83 0.32 
 -3 -6 -1 0.98 0.5 
 -3 -6 -1 -0.08 0.34 
 3 -6 1 0.22 0.46 
 -3 -6 -1 -0.09 0.26 
 3 -6 1 0.81 0.39 
 -3 -6 -1 0.7 0.29 
 -3 6 -1 0.69 0.32 
 -3 6 -1 0.57 0.29 
 3 6 1 0.71 0.35 
 -3 6 -1 -0.06 0.44 
 -4 -6 -1 10.48 0.68 
 -4 -6 -1 12.6 0.87 
 4 -6 1 11.12 0.92 
 -4 -6 -1 10.6 0.54 
 4 -6 1 11 0.7 
 -4 -6 -1 10.43 0.66 
 -4 -6 -1 8.8 0.72 
 4 -6 1 10.93 0.85 
 -4 6 -1 10.26 0.83 
 4 6 1 10.52 0.76 
 -4 6 -1 10.43 0.67 
 -4 6 -1 11.31 0.84 
 5 -6 1 26.35 1.33 
 5 -6 1 25.65 1.34 
 5 -6 1 27.75 1.18 
 -5 -6 -1 27.75 1.21 
 -5 -6 -1 26.74 1.16 
 -5 -6 -1 27.26 0.9 
 -5 6 -1 27.28 1.15 
 -5 6 -1 23.18 1.27 
 -5 6 -1 23.2 1.28 
 5 6 1 27.15 1.22 
 6 -6 1 137.47 4.43 
 6 -6 1 136.99 4.36 
 -6 -6 -1 134.22 4.2 
 -6 -6 -1 137.23 4.28 
 6 -6 1 139.68 4.21 
 6 6 1 138.26 4.28 
 -6 6 -1 139.91 4.41 
 -6 6 -1 134.34 4.44 
 -7 -6 -1 36.58 1.64 
 -7 -6 -1 40.47 1.61 
 7 -6 1 35.72 1.65 
 7 -6 1 33.82 1.75 
 -7 6 -1 32.13 1.71 
 -7 6 -1 36.52 1.8 
 8 -6 1 6.6 0.82 
 -8 -6 -1 4.97 0.73 
 -8 -6 -1 8.29 0.96 
 -8 6 -1 5.18 0.95 
 -8 6 -1 6.48 0.89 
 -9 -6 -1 0.9 0.6 
 -9 -6 -1 0.58 0.66 
 9 -6 1 0.73 0.56 
 -9 6 -1 0.58 0.77 
 -9 6 -1 0.77 0.64 
 -10 -6 -1 5.98 0.93 
 10 -6 1 2.6 0.69 
 -10 -6 -1 4.59 0.98 
 -10 6 -1 3.65 1.03 
 -10 6 -1 3 0.82 
 -11 -6 -1 7.02 1.07 
 11 -6 1 7.29 0.96 
 -11 -6 -1 5.69 1.13 
 -11 6 -1 6.56 1.2 
 -12 -6 -1 8.17 1.3 
 -12 -6 -1 8.35 1.17 
 -12 6 -1 7.3 1.31 
 -13 -6 -1 1.49 0.9 
 -13 -6 -1 -0.89 0.84 
 -13 6 -1 -0.13 1.03 
 -14 -6 -1 0.26 0.9 
 -14 -6 -1 2.68 1.26 
 -14 6 -1 -1.28 1.04 
 -14 -7 1 0.63 0.96 
 -14 -7 1 1.92 1.18 
 -14 7 1 -0.32 1.18 
 -13 -7 1 0.91 1.12 
 -13 -7 1 0.92 0.86 
 -13 7 1 0.12 1.09 
 -12 -7 1 -0.56 0.71 
 -12 -7 1 -1.08 0.92 
 -12 7 1 -0.89 0.91 
 -11 -7 1 -1.12 0.8 
 -11 -7 1 0.83 0.7 
 -11 7 1 -0.28 0.83 
 10 -7 -1 15.34 1.19 
 -10 -7 1 15.94 1.47 
 -10 -7 1 13.87 1.24 
 -10 7 1 12.52 1.35 
 -10 7 1 14.17 1.49 
 9 -7 -1 18.97 1.22 
 -9 -7 1 17.02 1.23 
 -9 -7 1 21.21 1.49 
 -9 7 1 17.65 1.44 
 -9 7 1 18.67 1.56 
 8 -7 -1 5.16 0.75 
 8 -7 -1 4.38 0.76 
 -8 -7 1 4.46 0.54 
 -8 -7 1 4.58 0.67 
 -8 -7 1 6.74 0.94 
 -8 7 1 4.2 0.81 
 -8 7 1 5.25 0.86 
 -7 -7 1 41.23 1.86 
 7 -7 -1 41.82 1.9 
 -7 -7 1 41.41 1.65 
 -7 -7 1 39.99 1.55 
 -7 -7 1 41.32 1.46 
 7 -7 -1 43.11 1.81 
 7 -7 -1 43.2 1.82 
 7 7 -1 41.49 1.86 
 -7 7 1 41.03 1.9 
 -7 7 1 37.06 1.82 
 -6 -7 1 20.49 1.17 
 -6 -7 1 18.79 0.9 
 -6 -7 1 19.02 0.99 
 6 -7 -1 22.55 1.33 
 -6 -7 1 19.97 0.98 
 6 -7 -1 20.4 1.18 
 6 -7 -1 19.68 1.17 
 -6 7 1 21.78 1.28 
 -6 7 1 20.5 1.26 
 6 7 -1 20.24 1.21 
 5 -7 -1 14.7 1.07 
 5 -7 -1 17.26 1.01 
 -5 -7 1 15.79 0.8 
 -5 -7 1 16.14 0.96 
 5 -7 -1 19.55 1.09 
 -5 -7 1 14.62 0.86 
 -5 -7 1 15.82 0.8 
 -5 7 1 16.28 1.06 
 -5 7 1 14.91 1.03 
 5 7 -1 17.58 1.06 
 -4 -7 1 19.65 0.81 
 4 -7 -1 21.93 1.14 
 4 -7 -1 20.27 1.06 
 -4 -7 1 19.93 1.02 
 -4 -7 1 20.12 0.94 
 4 -7 -1 19.48 1.13 
 4 7 -1 20.59 1.11 
 -4 7 1 20.48 1.06 
 -4 7 1 18.47 1.06 
 -3 -7 1 -0.22 0.18 
 3 -7 -1 -0.2 0.34 
 -3 -7 1 0.29 0.34 
 -3 -7 1 -0.56 0.41 
 3 -7 -1 0.04 0.37 
 3 -7 -1 -0.04 0.37 
 -3 -7 1 0.18 0.32 
 -3 7 1 0.13 0.37 
 3 7 -1 -0.6 0.39 
 -3 7 1 0.09 0.17 
 -2 -7 1 0.24 0.33 
 -2 -7 1 -0.01 0.38 
 2 -7 -1 -0.45 0.28 
 -2 -7 1 0.05 0.14 
 2 -7 -1 -0.02 0.35 
 2 7 -1 0.73 0.44 
 -2 7 1 0.03 0.38 
 -2 7 1 0.38 0.35 
 -2 7 1 0.46 0.34 
 -1 -7 1 141.33 4.06 
 1 -7 -1 145.83 4.32 
 -1 -7 1 144.31 4.31 
 1 -7 -1 144.64 4.19 
 1 7 -1 148.23 4.59 
 -1 7 1 144.09 4.25 
 -1 7 1 150.93 4.35 
 0 -7 -1 1.21 0.31 
 0 -7 -1 1.06 0.43 
 0 -7 1 1.12 0.27 
 0 -7 -1 0.82 0.25 
 0 -7 -1 0.4 0.34 
 0 -7 1 0.4 0.32 
 0 7 1 0.48 0.4 
 0 7 -1 0.94 0.23 
 0 7 1 0.67 0.28 
 0 7 -1 0.42 0.37 
 0 7 -1 0.78 0.46 
 -1 -7 -1 0.49 0.44 
 -1 -7 -1 1.49 0.29 
 1 -7 1 1.11 0.33 
 1 -7 1 1.21 0.32 
 1 -7 1 0.62 0.45 
 -1 -7 -1 0.82 0.28 
 1 -7 1 0.71 0.33 
 -1 7 -1 1.6 0.54 
 -1 7 -1 0.81 0.37 
 -1 7 -1 1.23 0.31 
 -2 -7 -1 29.26 1.3 
 2 -7 1 25.5 1.14 
 -2 -7 -1 27.43 1.02 
 -2 -7 -1 27.66 1.04 
 2 -7 1 28.69 1.06 
 2 -7 1 26.03 1.28 
 2 -7 1 27.2 1.15 
 -2 7 -1 27.46 1.09 
 -2 7 -1 26.44 1.26 
 -2 7 -1 27.83 1.13 
 -3 -7 -1 -0.05 0.27 
 3 -7 1 -0.11 0.39 
 -3 -7 -1 -0.06 0.26 
 -3 -7 -1 0.38 0.49 
 3 -7 1 0.1 0.42 
 3 -7 1 0.13 0.29 
 3 7 1 -0.34 0.29 
 -3 7 -1 -0.25 0.31 
 -3 7 -1 -0.42 0.35 
 -3 7 -1 -0.12 0.42 
 -4 -7 -1 18.57 0.89 
 -4 -7 -1 18.88 1.11 
 4 -7 1 18.93 1.16 
 4 -7 1 19.95 1.1 
 4 -7 1 19.29 0.94 
 -4 -7 -1 19.57 0.92 
 -4 -7 -1 18.26 0.79 
 -4 7 -1 19.65 0.91 
 4 7 1 17.54 1.1 
 4 7 1 18.9 0.95 
 -4 7 -1 18.85 1.13 
 -5 -7 -1 40.42 1.32 
 -5 -7 -1 41.77 1.78 
 5 -7 1 42.2 1.56 
 -5 -7 -1 40.27 1.52 
 -5 -7 -1 40.33 1.57 
 5 -7 1 41.66 1.75 
 5 -7 1 41.66 1.78 
 -5 7 -1 40.3 1.78 
 5 7 1 38.74 1.61 
 -5 7 -1 39.66 1.72 
 -6 -7 -1 10.08 0.85 
 6 -7 1 10.26 1 
 6 -7 1 10.19 0.82 
 6 -7 1 11.46 1 
 -6 -7 -1 9.73 0.49 
 -6 -7 -1 10.45 0.83 
 -6 7 -1 11.82 1.09 
 6 7 1 11.22 0.95 
 -6 7 -1 10.99 0.99 
 -7 -7 -1 0.73 0.48 
 -7 -7 -1 0.19 0.42 
 7 -7 1 0.18 0.52 
 7 -7 1 -0.18 0.5 
 7 -7 1 -0.65 0.41 
 -7 7 -1 0.7 0.62 
 -7 7 -1 0.46 0.55 
 7 7 1 0.73 0.52 
 8 -7 1 44.05 1.95 
 -8 -7 -1 45.57 1.98 
 -8 -7 -1 42.37 1.85 
 -8 7 -1 41.39 2.06 
 -8 7 -1 47.24 2.11 
 -9 -7 -1 31.49 1.72 
 -9 -7 -1 30.12 1.62 
 9 -7 1 29.49 1.63 
 -9 7 -1 26.94 1.75 
 -9 7 -1 31.52 1.78 
 10 -7 1 3.96 0.81 
 -10 -7 -1 3.61 0.88 
 -10 -7 -1 3.08 0.79 
 -10 7 -1 4.81 1.1 
 -11 -7 -1 5.25 1.09 
 11 -7 1 8.32 1.05 
 -11 -7 -1 7.8 1.06 
 -11 7 -1 8.44 1.36 
 -12 -7 -1 0.79 0.81 
 -12 -7 -1 1.97 1.01 
 -12 7 -1 1.02 1.06 
 -13 -7 -1 1.63 0.88 
 -13 -7 -1 2.16 1.09 
 -13 7 -1 1.5 1.16 
 -13 -8 1 11.04 1.6 
 -13 -8 1 10.34 1.34 
 -13 8 1 8.54 1.46 
 -12 -8 1 0.13 0.99 
 -12 -8 1 -0.95 0.7 
 -12 8 1 -0.36 0.98 
 -11 -8 1 15.12 1.32 
 -11 -8 1 13.22 1.46 
 -11 8 1 15.92 1.7 
 -10 -8 1 -0.27 0.74 
 10 -8 -1 -0.9 0.51 
 -10 -8 1 -1.3 0.52 
 -10 8 1 -0.79 0.72 
 -9 -8 1 23.26 1.57 
 9 -8 -1 21.06 1.4 
 9 -8 -1 22.83 1.44 
 -9 -8 1 22 1.34 
 -9 8 1 23.06 1.56 
 -9 8 1 21.59 1.58 
 8 -8 -1 2.28 0.64 
 8 -8 -1 2.22 0.64 
 -8 -8 1 1.69 0.55 
 -8 -8 1 3.14 0.74 
 8 8 -1 1.73 0.69 
 -8 8 1 2.05 0.77 
 -8 8 1 3.25 0.81 
 -7 -8 1 11.27 0.71 
 7 -8 -1 11.53 1.01 
 7 -8 -1 12.99 1.05 
 -7 -8 1 10.96 1.02 
 -7 -8 1 11.67 0.85 
 7 -8 -1 11.14 1.06 
 -7 8 1 12.57 1.15 
 7 8 -1 12.46 1.14 
 -7 8 1 11.36 1.14 
 -6 -8 1 12.26 0.78 
 6 -8 -1 10.93 1.04 
 6 -8 -1 11.84 1.04 
 -6 -8 1 12.96 0.96 
 -6 -8 1 12.44 0.75 
 6 -8 -1 11.59 0.96 
 -6 8 1 13.44 1.11 
 6 8 -1 13.28 1.03 
 -6 8 1 14.25 1.08 
 5 -8 -1 27.1 1.44 
 5 -8 -1 30.76 1.35 
 -5 -8 1 28.43 1.17 
 -5 -8 1 27.05 1.31 
 -5 -8 1 29.38 1.11 
 5 -8 -1 30.45 1.44 
 -5 8 1 28.55 1.38 
 5 8 -1 29.12 1.42 
 -5 8 1 24.99 1.37 
 4 -8 -1 2.15 0.53 
 4 -8 -1 2.3 0.59 
 -4 -8 1 2.5 0.49 
 -4 -8 1 2.44 0.44 
 4 -8 -1 3.18 0.54 
 -4 -8 1 2.81 0.33 
 -4 -8 1 3.01 0.65 
 -4 8 1 1.51 0.5 
 4 8 -1 3.04 0.6 
 3 -8 -1 13.83 0.94 
 -3 -8 1 14.48 0.81 
 -3 -8 1 12.31 0.94 
 3 -8 -1 13.87 0.96 
 -3 -8 1 13.55 0.54 
 3 -8 -1 12.07 0.84 
 -3 8 1 13.03 0.87 
 -3 8 1 12.73 0.81 
 3 8 -1 13.41 0.94 
 -2 -8 1 3.18 0.45 
 -2 -8 1 2.45 0.21 
 -2 -8 1 2.25 0.48 
 2 -8 -1 1.93 0.4 
 2 -8 -1 2.1 0.46 
 -2 8 1 2.52 0.44 
 -2 8 1 2.47 0.45 
 2 8 -1 1.96 0.52 
 -1 -8 1 26.8 1.17 
 1 -8 -1 29 1.21 
 1 -8 -1 28.42 1.04 
 -1 8 1 29.01 1.33 
 -1 8 1 26.16 1.09 
 1 8 -1 25.43 1.29 
 0 -8 1 4.36 0.5 
 0 -8 1 5.51 0.45 
 0 -8 -1 5.98 0.52 
 0 -8 -1 4.91 0.58 
 0 -8 -1 4.89 0.42 
 0 8 -1 5.44 0.4 
 0 8 -1 7.86 0.82 
 0 8 1 5.83 0.69 
 0 8 -1 4.84 0.57 
 0 8 1 4.58 0.44 
 1 -8 1 22.59 0.98 
 1 -8 1 21.57 0.95 
 -1 -8 -1 22.33 1.13 
 -1 -8 -1 21.67 0.89 
 1 -8 1 20.94 1.17 
 1 -8 1 20.94 0.95 
 -1 8 -1 21.52 0.99 
 1 8 1 22.33 1.27 
 -1 8 -1 22.48 1.21 
 -1 8 -1 20.38 0.89 
 2 -8 1 14.55 0.85 
 2 -8 1 14.49 0.76 
 -2 -8 -1 14.7 0.7 
 2 -8 1 13.03 0.97 
 -2 -8 -1 14.06 0.92 
 -2 -8 -1 14.01 0.74 
 -2 8 -1 13.89 1.03 
 2 8 1 14.25 0.97 
 -2 8 -1 12.98 0.77 
 -2 8 -1 12.84 0.8 
 -3 -8 -1 8.39 0.58 
 3 -8 1 8.67 0.85 
 -3 -8 -1 7.9 0.59 
 3 -8 1 9.47 0.75 
 -3 -8 -1 9.17 0.85 
 3 -8 1 10.01 0.67 
 -3 8 -1 10.18 0.84 
 -3 8 -1 7.98 0.68 
 -3 8 -1 8.69 0.66 
 3 8 1 10.56 0.83 
 -4 -8 -1 2.25 0.39 
 4 -8 1 2.92 0.45 
 -4 -8 -1 2.36 0.64 
 4 -8 1 2.23 0.51 
 4 -8 1 2.36 0.64 
 -4 -8 -1 1.49 0.38 
 4 8 1 2.52 0.52 
 -4 8 -1 2.44 0.45 
 -4 8 -1 2.2 0.57 
 -4 8 -1 1.83 0.43 
 4 8 1 2.29 0.46 
 5 -8 1 55.1 2.12 
 5 -8 1 53.02 1.9 
 5 -8 1 54.11 2.18 
 -5 -8 -1 53.54 2.13 
 -5 -8 -1 54.56 1.94 
 -5 -8 -1 52.67 1.86 
 -5 -8 -1 53.88 1.72 
 -5 8 -1 53.29 2.1 
 -5 8 -1 51.77 2.06 
 5 8 1 52.32 2.01 
 6 -8 1 7.31 0.73 
 6 -8 1 6.29 0.85 
 -6 -8 -1 5.98 0.68 
 -6 -8 -1 6.73 0.48 
 -6 -8 -1 5.83 0.63 
 6 -8 1 7.71 0.9 
 -6 -8 -1 6.41 0.88 
 -6 8 -1 7.02 0.84 
 -6 8 -1 6.76 0.9 
 6 8 1 7.44 0.8 
 7 -8 1 56.89 2.34 
 7 -8 1 58.47 2.41 
 7 -8 1 55.29 2.13 
 -7 -8 -1 57.79 2.42 
 -7 -8 -1 57.81 2.14 
 -7 -8 -1 59 2.22 
 7 8 1 56.99 2.24 
 -7 8 -1 55.34 2.35 
 -7 8 -1 57.34 2.37 
 8 -8 1 1.7 0.64 
 -8 -8 -1 1.16 0.56 
 -8 -8 -1 2.25 0.65 
 -8 8 -1 1.86 0.69 
 -8 8 -1 0.48 0.65 
 9 -8 1 7.46 0.99 
 -9 -8 -1 7.07 1.01 
 -9 -8 -1 7.21 0.9 
 -9 8 -1 6.58 1.12 
 10 -8 1 3.35 0.84 
 -10 -8 -1 4.97 0.99 
 -10 -8 -1 4.58 0.84 
 -10 8 -1 3.49 1.04 
 -11 -8 -1 3.16 0.84 
 -11 -8 -1 3.98 1 
 11 -8 1 3.28 0.83 
 -11 8 -1 4.56 1.13 
 -12 -8 -1 -0.53 0.7 
 -12 -8 -1 -0.86 0.88 
 -12 8 -1 -0.26 0.99 
 -13 -8 -1 1 0.9 
 -13 -8 -1 2.27 1.12 
 -13 8 -1 1.71 1.16 
 -13 -9 1 0.98 0.85 
 -13 -9 1 -1.62 0.94 
 -13 9 1 -0.24 1.05 
 -12 -9 1 1.32 0.97 
 -12 -9 1 -0.09 0.75 
 -12 9 1 0.66 1.02 
 -11 -9 1 3.44 0.81 
 -11 -9 1 4.58 1.11 
 -11 9 1 3.73 1.13 
 -10 -9 1 6.88 1.14 
 10 -9 -1 6.8 0.97 
 -10 -9 1 6.24 0.88 
 -10 9 1 7.66 1.23 
 9 -9 -1 0.4 0.62 
 9 -9 -1 0.23 0.62 
 -9 -9 1 1.18 0.74 
 -9 -9 1 0.9 0.53 
 -9 9 1 0.25 0.68 
 -8 -9 1 1 0.63 
 -8 -9 1 1.82 0.52 
 8 -9 -1 1.89 0.67 
 -8 -9 1 0.38 0.36 
 8 -9 -1 1.36 0.67 
 -8 9 1 2.64 0.83 
 -8 9 1 1.07 0.73 
 8 9 -1 1.21 0.66 
 7 -9 -1 33.45 1.66 
 -7 -9 1 34.67 1.68 
 7 -9 -1 35.52 1.77 
 7 -9 -1 34.33 1.78 
 -7 -9 1 35.87 1.45 
 -7 -9 1 34.77 1.36 
 -7 9 1 33.04 1.74 
 -7 9 1 35.68 1.78 
 7 9 -1 33.5 1.71 
 -6 -9 1 3.75 0.48 
 -6 -9 1 3.7 0.64 
 6 -9 -1 4.11 0.67 
 -6 -9 1 4.69 0.54 
 6 -9 -1 3.11 0.72 
 6 -9 -1 4.04 0.74 
 -6 9 1 4.72 0.75 
 6 9 -1 2.91 0.67 
 -6 9 1 2.25 0.64 
 -5 -9 1 7.72 0.87 
 5 -9 -1 8.31 0.82 
 -5 -9 1 9.18 0.6 
 -5 -9 1 9.95 0.85 
 5 -9 -1 8.54 0.95 
 -5 -9 1 8.88 0.71 
 5 -9 -1 9.34 0.92 
 5 9 -1 9.85 0.96 
 -5 9 1 9.63 0.89 
 -5 9 1 12.05 1 
 -4 -9 1 1.97 0.54 
 4 -9 -1 2.48 0.64 
 -4 -9 1 2.4 0.47 
 -4 -9 1 2.83 0.31 
 4 -9 -1 1.95 0.5 
 4 -9 -1 1.96 0.52 
 -4 -9 1 2.67 0.51 
 -4 9 1 2.73 0.53 
 -4 9 1 0.75 0.31 
 4 9 -1 2.35 0.59 
 3 -9 -1 1.87 0.5 
 -3 -9 1 2.23 0.25 
 -3 -9 1 1.9 0.43 
 -3 -9 1 1.43 0.53 
 3 9 -1 1.84 0.57 
 -3 9 1 2.08 0.5 
 -3 9 1 1.31 0.46 
 2 -9 -1 -0.36 0.27 
 -2 -9 1 0.29 0.16 
 2 -9 -1 0.41 0.4 
 -2 -9 1 -0.15 0.38 
 -2 -9 1 0.45 0.34 
 2 9 -1 0.49 0.47 
 -2 9 1 0.04 0.33 
 -1 -9 1 62.92 2.17 
 1 -9 -1 61.97 2.02 
 1 -9 -1 63.61 2.19 
 -1 9 1 61.51 2.06 
 1 9 -1 65.44 2.32 
 -1 9 1 62.85 2.3 
 0 -9 -1 2.67 0.52 
 0 -9 -1 2.28 0.34 
 0 -9 -1 1.89 0.39 
 0 -9 1 2.35 0.44 
 0 9 1 2.12 0.35 
 0 9 -1 2.16 0.6 
 0 9 1 2.63 0.59 
 0 9 -1 2.02 0.29 
 -1 -9 -1 15.19 1 
 1 -9 1 15.98 0.83 
 1 -9 1 14.99 1.04 
 1 -9 1 15.74 0.84 
 -1 -9 -1 15.9 0.75 
 1 9 1 15.75 0.98 
 -1 9 -1 13.04 1.03 
 1 9 1 15.39 0.69 
 -1 9 -1 14.77 0.75 
 -1 9 -1 14.12 0.96 
 2 -9 1 51.05 2.05 
 -2 -9 -1 51.97 1.95 
 -2 -9 -1 49.96 1.68 
 2 -9 1 50.88 1.84 
 2 -9 1 51.8 1.77 
 -2 -9 -1 51.23 1.72 
 -2 9 -1 48.84 2.04 
 -2 9 -1 50.77 1.83 
 -2 9 -1 51.69 1.78 
 2 9 1 51.92 1.91 
 -3 -9 -1 12.92 0.76 
 3 -9 1 14.22 0.8 
 -3 -9 -1 15.21 0.74 
 3 -9 1 12.98 1.1 
 -3 -9 -1 14.25 1.06 
 3 -9 1 14.07 0.95 
 -3 9 -1 14.47 0.89 
 -3 9 -1 12.63 0.9 
 3 9 1 13.34 0.94 
 4 -9 1 0.48 0.45 
 -4 -9 -1 0.82 0.57 
 4 -9 1 -0.36 0.45 
 4 -9 1 0.44 0.37 
 -4 -9 -1 0.05 0.31 
 -4 -9 -1 -0.33 0.3 
 4 9 1 -0.09 0.42 
 -4 9 -1 0.17 0.41 
 -4 9 -1 0.13 0.48 
 -5 -9 -1 0.76 0.35 
 -5 -9 -1 0 0.56 
 5 -9 1 0.98 0.57 
 -5 -9 -1 0.47 0.31 
 5 -9 1 1.3 0.55 
 5 -9 1 0.24 0.41 
 -5 -9 -1 0.19 0.35 
 -5 9 -1 -0.06 0.53 
 -5 9 -1 0.05 0.14 
 5 9 1 0.47 0.49 
 -6 -9 -1 2.06 0.47 
 6 -9 1 1.84 0.51 
 6 -9 1 2.96 0.68 
 -6 -9 -1 2.98 0.54 
 -6 -9 -1 2.6 0.77 
 -6 -9 -1 2.69 0.37 
 6 -9 1 1.91 0.64 
 -6 9 -1 2.44 0.59 
 6 9 1 1.44 0.56 
 -6 9 -1 3.78 0.76 
 -7 -9 -1 1.82 0.3 
 7 -9 1 1.2 0.68 
 7 -9 1 2.04 0.72 
 -7 -9 -1 2.04 0.73 
 7 -9 1 3.24 0.63 
 -7 -9 -1 2.88 0.6 
 -7 -9 -1 0.44 0.46 
 -7 9 -1 1.72 0.62 
 7 9 1 1.22 0.59 
 -7 9 -1 2.44 0.77 
 -8 -9 -1 14.26 1.07 
 8 -9 1 13.39 1.25 
 8 -9 1 14.96 1.15 
 -8 -9 -1 16.1 1.18 
 -8 -9 -1 15.09 1.4 
 8 9 1 16.02 1.3 
 -8 9 -1 12.73 1.28 
 -9 -9 -1 7 1 
 -9 -9 -1 6.17 1.1 
 9 -9 1 7.55 1.03 
 -9 -9 -1 4.44 0.79 
 -9 9 -1 6.56 1.07 
 10 -9 1 -0.38 0.65 
 -10 -9 -1 1.29 0.68 
 -10 -9 -1 1.96 0.91 
 -10 -9 -1 1.62 0.8 
 -10 9 -1 -0.24 0.87 
 -11 -9 -1 4.23 1.05 
 -11 -9 -1 3.87 0.87 
 11 -9 1 3.38 0.92 
 -11 9 -1 2.82 1 
 -12 -9 -1 1.54 0.92 
 -12 -9 -1 2.96 0.95 
 -12 9 -1 2.51 1.07 
 -13 -9 -1 3.63 1.08 
 -13 -9 -1 3.9 1.21 
 -13 -9 -1 3.66 1.24 
 -13 9 -1 1.7 1.24 
 -13 -10 1 11.54 1.61 
 -13 -10 1 8.71 1.24 
 -13 10 1 11.4 1.62 
 -12 -10 1 7.13 1.37 
 -12 -10 1 7.41 1.11 
 -12 10 1 8.03 1.42 
 -11 -10 1 10.77 1.36 
 -11 -10 1 9.64 1.06 
 -11 10 1 7.55 1.26 
 10 -10 -1 0.5 0.66 
 -10 -10 1 1 0.6 
 -10 -10 1 1.04 0.81 
 -10 10 1 -0.44 0.79 
 9 -10 -1 0.93 0.68 
 -9 -10 1 1.71 0.76 
 9 -10 -1 2.61 0.77 
 -9 -10 1 1.44 0.59 
 -9 10 1 0.59 0.74 
 9 10 -1 1.58 0.78 
 8 -10 -1 0.58 0.61 
 -8 -10 1 1.29 0.65 
 8 -10 -1 1.3 0.7 
 -8 -10 1 -0.05 0.45 
 -8 -10 1 -0.28 0.34 
 -8 10 1 0.49 0.61 
 8 10 -1 0.36 0.68 
 -7 -10 1 4.44 0.82 
 7 -10 -1 3.47 0.72 
 -7 -10 1 4.64 0.58 
 -7 -10 1 4.43 0.58 
 -7 -10 1 4.13 0.74 
 7 -10 -1 4.41 0.84 
 -7 10 1 4.08 0.79 
 7 10 -1 2.06 0.69 
 6 -10 -1 3.08 0.67 
 -6 -10 1 2.97 0.5 
 -6 -10 1 3.74 0.79 
 -6 -10 1 3.45 0.65 
 6 -10 -1 4.44 0.82 
 6 -10 -1 3.08 0.68 
 -6 -10 1 3.64 0.46 
 -6 10 1 2.6 0.69 
 -6 10 1 2.96 0.64 
 6 10 -1 3 0.71 
 -5 -10 1 -0.38 0.5 
 5 -10 -1 -0.2 0.45 
 -5 -10 1 -0.15 0.25 
 -5 -10 1 0.36 0.42 
 -5 -10 1 0.73 0.42 
 5 -10 -1 0.66 0.5 
 5 -10 -1 -0.35 0.49 
 5 10 -1 -0.34 0.49 
 -5 10 1 -0.04 0.48 
 -5 10 1 -0.11 0.13 
 -4 -10 1 0.17 0.49 
 4 -10 -1 -0.32 0.4 
 4 -10 -1 0.05 0.55 
 -4 -10 1 0.73 0.42 
 -4 -10 1 0.21 0.22 
 -4 -10 1 -0.23 0.34 
 4 10 -1 -0.11 0.49 
 -4 10 1 0.05 0.4 
 -4 10 1 0.14 0.43 
 -3 -10 1 5.46 0.73 
 -3 -10 1 5.04 0.35 
 -3 -10 1 3.83 0.54 
 3 -10 -1 4.9 0.65 
 -3 10 1 4.29 0.58 
 -3 10 1 4.19 0.59 
 3 10 -1 4.29 0.71 
 -2 -10 1 76.9 2.25 
 -2 -10 1 77.98 2.55 
 2 -10 -1 77.58 2.5 
 2 -10 -1 77.9 2.61 
 -2 -10 1 75.56 2.64 
 -2 10 1 75.95 2.54 
 -2 10 1 75.55 2.76 
 2 10 -1 76.02 2.73 
 -1 -10 1 10.91 0.8 
 1 -10 -1 10.91 0.85 
 1 -10 -1 10.9 0.65 
 -1 10 1 9.94 0.7 
 -1 10 1 11.61 1.01 
 1 10 -1 11.35 0.98 
 0 -10 -1 0.58 0.45 
 0 -10 -1 0.27 0.32 
 0 -10 1 0.41 0.35 
 0 -10 -1 0.65 0.29 
 0 10 -1 0.04 0.48 
 0 10 1 0.29 0.49 
 0 10 1 0.62 0.28 
 1 -10 1 2.58 0.44 
 1 -10 1 2.07 0.59 
 1 -10 1 2.99 0.48 
 -1 -10 -1 2.35 0.37 
 -1 -10 -1 2.85 0.57 
 -1 10 -1 2.85 0.39 
 1 10 1 2.64 0.6 
 1 10 1 2.5 0.34 
 -1 10 -1 2.67 0.61 
 2 -10 1 10.65 0.81 
 2 -10 1 12.24 1.1 
 -2 -10 -1 12.42 0.98 
 -2 -10 -1 11.46 0.68 
 2 -10 1 11.71 0.78 
 -2 -10 -1 11.31 0.71 
 -2 10 -1 11.5 0.77 
 -2 10 -1 11.1 1.03 
 2 10 1 11.62 0.89 
 3 -10 1 2.7 0.48 
 -3 -10 -1 1.41 0.38 
 3 -10 1 2.04 0.52 
 -3 -10 -1 1.31 0.56 
 3 -10 1 0.68 0.51 
 -3 -10 -1 1.75 0.35 
 -3 10 -1 1.58 0.47 
 -3 10 -1 0.11 0.59 
 3 10 1 1.89 0.54 
 -4 -10 -1 20.37 1.32 
 -4 -10 -1 19.84 0.91 
 -4 -10 -1 19.45 0.98 
 4 -10 1 18.64 1.26 
 4 -10 1 20.22 1.19 
 4 -10 1 19.41 1.04 
 -4 10 -1 19.28 1.2 
 4 10 1 19.58 1.13 
 -4 10 -1 18.52 1.1 
 -5 -10 -1 31.58 1.68 
 -5 -10 -1 32.12 1.3 
 -5 -10 -1 31.34 1.38 
 5 -10 1 33.71 1.41 
 5 -10 1 32.44 1.73 
 5 -10 1 34.41 1.63 
 -5 -10 -1 30.8 1.25 
 5 10 1 33.85 1.53 
 -5 10 -1 31.32 1.49 
 -5 10 -1 32.4 1.63 
 -6 -10 -1 0.23 0.32 
 6 -10 1 -0.02 0.53 
 -6 -10 -1 -0.24 0.36 
 -6 -10 -1 0.03 0.37 
 6 -10 1 0.92 0.58 
 6 -10 1 0.06 0.43 
 -6 -10 -1 -0.12 0.57 
 -6 10 -1 0.83 0.56 
 6 10 1 0.18 0.49 
 -6 10 -1 -0.19 0.37 
 -7 -10 -1 19.38 0.83 
 -7 -10 -1 18.59 1.51 
 -7 -10 -1 19.3 1.13 
 7 -10 1 19.12 1.42 
 -7 -10 -1 20.77 1.25 
 7 -10 1 16.86 1.16 
 7 10 1 17.98 1.26 
 -7 10 -1 18.03 1.42 
 -8 -10 -1 1 0.56 
 -8 -10 -1 0.68 0.51 
 8 -10 1 0.75 0.59 
 -8 -10 -1 -0.03 0.7 
 8 -10 1 -0.27 0.62 
 -8 10 -1 1.32 0.71 
 8 10 1 0.74 0.63 
 -9 -10 -1 8.37 0.92 
 -9 -10 -1 9.41 1.07 
 -9 -10 -1 5.56 1.11 
 9 -10 1 5.89 1.03 
 -9 10 -1 7.69 1.22 
 -10 -10 -1 3.5 0.79 
 10 -10 1 4.42 0.95 
 -10 -10 -1 5.07 1.02 
 -10 -10 -1 3.07 0.95 
 -10 10 -1 3.89 1.13 
 11 -10 1 4.3 1.03 
 -11 -10 -1 5.5 1.09 
 -11 -10 -1 4.92 1.17 
 -11 -10 -1 5.44 0.96 
 -11 10 -1 6.25 1.23 
 -12 -10 -1 0.81 0.82 
 -12 -10 -1 -0.26 0.97 
 -12 -10 -1 2.06 0.97 
 -12 10 -1 1.33 1.15 
 -13 -10 -1 -0.88 0.9 
 -13 -10 -1 -0.02 0.8 
 -13 -10 -1 -0.16 1.02 
 -13 10 -1 1.66 1.1 
 -12 -11 1 1.64 0.76 
 -12 -11 1 3.92 1.13 
 -12 11 1 1.72 1.09 
 -11 -11 1 0.55 0.64 
 -11 -11 1 1.33 0.89 
 -11 11 1 -1.27 0.86 
 -10 -11 1 4.84 1.13 
 -10 -11 1 4.24 0.76 
 10 -11 -1 2.47 0.87 
 -10 -11 1 4.57 1 
 10 -11 -1 5.81 1.02 
 -10 11 1 2.4 0.91 
 9 -11 -1 4.76 0.92 
 9 -11 -1 6.87 1.07 
 -9 -11 1 7.36 0.83 
 -9 -11 1 7.09 0.99 
 -9 -11 1 8.49 1.24 
 -9 11 1 4.71 1.05 
 9 11 -1 3.33 0.91 
 -8 -11 1 20.98 1.17 
 -8 -11 1 23.85 1.46 
 -8 -11 1 20.08 1.67 
 8 -11 -1 19.02 1.41 
 8 -11 -1 21.23 1.53 
 -8 11 1 19.54 1.54 
 8 11 -1 17.41 1.52 
 7 -11 -1 0.51 0.64 
 7 -11 -1 1.47 0.64 
 -7 -11 1 0.81 0.42 
 -7 -11 1 0.98 0.68 
 -7 -11 1 0.27 0.53 
 -7 -11 1 0.22 0.42 
 7 11 -1 1.65 0.66 
 -7 11 1 0.43 0.68 
 -6 -11 1 2.69 0.54 
 6 -11 -1 2.49 0.78 
 -6 -11 1 2.15 0.58 
 6 -11 -1 2.28 0.63 
 -6 -11 1 3.11 0.75 
 -6 -11 1 2.96 0.43 
 -6 11 1 2.5 0.71 
 6 11 -1 1.64 0.65 
 -5 -11 1 17.57 1.35 
 5 -11 -1 17.18 1.26 
 5 -11 -1 18.51 1.16 
 -5 -11 1 17.91 1.03 
 5 -11 -1 21.09 1.41 
 -5 -11 1 17.18 0.8 
 -5 -11 1 17.29 1.1 
 -5 11 1 19.36 1.17 
 5 11 -1 16.64 1.27 
 -5 11 1 19.26 1.13 
 -4 -11 1 3.88 0.35 
 -4 -11 1 4.6 0.78 
 -4 -11 1 3.83 0.6 
 -4 -11 1 3.64 0.61 
 4 -11 -1 4.34 0.67 
 4 -11 -1 4.07 0.78 
 -4 11 1 4.9 0.69 
 -4 11 1 2.47 0.54 
 4 11 -1 3.71 0.71 
 -3 -11 1 1.7 0.22 
 -3 -11 1 1.26 0.44 
 3 -11 -1 1.15 0.48 
 -3 -11 1 1.81 0.59 
 3 11 -1 0.91 0.56 
 -3 11 1 1.04 0.41 
 2 -11 -1 0.49 0.45 
 -2 -11 1 0.18 0.2 
 -2 -11 1 0.71 0.4 
 -2 -11 1 0.06 0.43 
 2 11 -1 -0.1 0.51 
 -2 11 1 0.51 0.36 
 -2 11 1 -0.84 0.49 
 -1 -11 1 23.97 1.2 
 1 -11 -1 26.67 1.27 
 1 -11 -1 25.07 1.04 
 -1 11 1 21.96 1.05 
 1 11 -1 24.66 1.37 
 -1 11 1 23.97 1.36 
 0 -11 -1 74.51 2.65 
 0 -11 -1 75.65 2.46 
 0 -11 1 76.98 2.58 
 0 -11 -1 72.67 2.37 
 0 11 1 75.44 2.36 
 0 11 -1 72.97 2.76 
 0 11 1 75.64 2.71 
 -1 -11 -1 0.31 0.32 
 1 -11 1 -0.14 0.33 
 1 -11 1 0.47 0.5 
 -1 -11 -1 0.02 0.49 
 -1 11 -1 0.58 0.55 
 -1 11 -1 0.33 0.3 
 1 11 1 0.29 0.49 
 -2 -11 -1 12.55 0.71 
 2 -11 1 12.06 0.82 
 2 -11 1 12.81 0.88 
 -2 -11 -1 10.69 0.73 
 -2 -11 -1 12.1 1.01 
 2 -11 1 12.61 1.17 
 -2 11 -1 11.9 0.78 
 2 11 1 12.18 1 
 -2 11 -1 10.95 1.03 
 -3 -11 -1 0.17 0.3 
 -3 -11 -1 -0.06 0.52 
 3 -11 1 0.37 0.39 
 3 -11 1 0.57 0.6 
 3 -11 1 0.6 0.44 
 -3 -11 -1 -0.22 0.33 
 -3 11 -1 0.44 0.58 
 3 11 1 0.11 0.47 
 -3 11 -1 0.16 0.39 
 4 -11 1 2.93 0.68 
 -4 -11 -1 2.53 0.41 
 4 -11 1 2.41 0.5 
 -4 -11 -1 2.02 0.7 
 4 -11 1 2.06 0.57 
 -4 -11 -1 1.21 0.44 
 -4 11 -1 2.1 0.52 
 4 11 1 2.22 0.6 
 5 -11 1 2.03 0.64 
 -5 -11 -1 1.82 0.45 
 5 -11 1 1.67 0.72 
 -5 -11 -1 2.05 0.47 
 -5 -11 -1 1.71 0.41 
 -5 -11 -1 3.26 0.78 
 5 -11 1 2.32 0.55 
 5 11 1 1.84 0.61 
 -5 11 -1 1.56 0.54 
 -5 11 -1 2.89 0.72 
 -6 -11 -1 0.08 0.38 
 -6 -11 -1 0.04 0.39 
 -6 -11 -1 0.03 0.66 
 -6 -11 -1 0.09 0.35 
 6 -11 1 0.22 0.46 
 6 -11 1 0.27 0.62 
 -6 11 -1 -0.29 0.56 
 6 11 1 0.05 0.5 
 -7 -11 -1 3.56 0.47 
 -7 -11 -1 5.04 0.73 
 7 -11 1 5.38 0.74 
 -7 -11 -1 4.13 0.62 
 7 -11 1 3.19 0.86 
 -7 -11 -1 3.74 0.87 
 7 11 1 3.86 0.77 
 -7 11 -1 3.99 0.81 
 8 -11 1 5.08 1 
 8 -11 1 5.89 0.82 
 -8 -11 -1 4.48 1.03 
 -8 -11 -1 5.48 0.8 
 -8 -11 -1 4.89 0.71 
 8 11 1 6.04 0.95 
 -8 11 -1 4.47 0.92 
 -9 -11 -1 0.38 0.55 
 -9 -11 -1 1.1 0.89 
 9 -11 1 -0.26 0.71 
 -9 -11 -1 2.81 0.78 
 -9 11 -1 0.67 0.74 
 9 11 1 1.27 0.73 
 -10 -11 -1 -0.11 0.86 
 -10 -11 -1 2.37 0.84 
 10 -11 1 1.97 0.84 
 -10 -11 -1 1.48 0.67 
 -10 11 -1 1.69 0.91 
 -11 -11 -1 0.87 0.95 
 -11 -11 -1 1.58 0.76 
 -11 -11 -1 1.99 0.91 
 11 -11 1 2.17 0.88 
 -11 11 -1 0.8 0.9 
 -12 -11 -1 15.44 1.66 
 -12 -11 -1 13.39 1.39 
 -12 -11 -1 16.52 1.88 
 -12 11 -1 17.3 1.97 
 -12 -12 1 6.65 1.01 
 -12 -12 1 9.35 1.62 
 -12 -12 1 11.86 1.54 
 -12 12 1 8.57 1.56 
 -11 -12 1 2.67 1.13 
 -11 -12 1 1.07 0.88 
 -11 -12 1 1.67 0.71 
 -11 12 1 -0.31 0.92 
 -10 -12 1 0.04 0.56 
 -10 -12 1 0.5 0.99 
 -10 -12 1 1.67 0.87 
 10 -12 -1 -0.11 0.72 
 10 -12 -1 2.48 0.86 
 -10 12 1 0.82 0.92 
 10 12 -1 1.16 0.83 
 -9 -12 1 1.09 0.91 
 9 -12 -1 0.4 0.7 
 -9 -12 1 0.53 0.51 
 9 -12 -1 -1.11 0.71 
 -9 -12 1 0.68 0.71 
 -9 12 1 0.87 0.82 
 9 12 -1 -0.44 0.71 
 -8 -12 1 8.28 0.77 
 -8 -12 1 7.3 1.18 
 -8 -12 1 9.24 1.04 
 8 -12 -1 8.9 1.07 
 8 -12 -1 8.61 1.17 
 8 12 -1 8.99 1.17 
 -8 12 1 7.53 1.13 
 -7 -12 1 0.41 0.45 
 -7 -12 1 0.19 0.52 
 -7 -12 1 0.55 0.79 
 7 -12 -1 0.29 0.58 
 -7 -12 1 -0.01 0.37 
 7 -12 -1 0.37 0.69 
 -7 12 1 0.37 0.66 
 7 12 -1 -0.87 0.55 
 -6 -12 1 9.02 0.65 
 6 -12 -1 6.33 0.97 
 6 -12 -1 8.53 0.94 
 -6 -12 1 6.81 0.97 
 -6 -12 1 7.87 0.81 
 -6 -12 1 7.56 0.88 
 -6 12 1 7.91 0.96 
 6 12 -1 8.53 1.04 
 -5 -12 1 2.41 0.54 
 -5 -12 1 1.71 0.53 
 -5 -12 1 2.17 0.34 
 5 -12 -1 2.49 0.79 
 5 -12 -1 2.76 0.65 
 -5 -12 1 2.17 0.76 
 -5 12 1 1.87 0.64 
 5 12 -1 2.24 0.69 
 -4 -12 1 -0.21 0.39 
 -4 -12 1 0.41 0.22 
 -4 -12 1 0.5 0.46 
 4 -12 -1 0.24 0.48 
 4 -12 -1 -0.37 0.6 
 -4 -12 1 0.13 0.58 
 4 12 -1 -0.06 0.53 
 -4 12 1 0.17 0.45 
 -4 12 1 0.63 0.48 
 -3 -12 1 19.08 1.24 
 3 -12 -1 19.94 1.19 
 -3 -12 1 19.01 0.73 
 -3 -12 1 18.94 1.08 
 -3 12 1 19.22 1.08 
 -3 12 1 16.79 1.22 
 3 12 -1 17.85 1.28 
 -2 -12 1 2.04 0.54 
 2 -12 -1 2.23 0.57 
 -2 -12 1 1.5 0.46 
 -2 12 1 0.49 0.36 
 -2 12 1 0.82 0.6 
 2 12 -1 0.79 0.58 
 -1 -12 1 0.74 0.44 
 1 -12 -1 0.66 0.47 
 -1 12 1 0.58 0.34 
 1 12 -1 0.07 0.58 
 -1 12 1 0.82 0.57 
 0 -12 -1 24.44 1.02 
 0 -12 1 23.25 1.19 
 0 -12 -1 23.3 1.3 
 0 12 -1 22.88 1.35 
 0 12 1 22.67 1.37 
 1 -12 1 2.77 0.73 
 -1 -12 -1 1.64 0.59 
 1 -12 1 2.67 0.52 
 -1 -12 -1 1.84 0.42 
 -1 12 -1 3.06 0.74 
 1 12 1 2.2 0.65 
 -2 -12 -1 17.45 1.24 
 2 -12 1 20.23 1.09 
 -2 -12 -1 18.9 0.91 
 2 -12 1 18.55 1.1 
 2 -12 1 17.51 1.28 
 -2 -12 -1 19.41 0.97 
 2 12 1 19.06 1.23 
 -2 12 -1 18.74 1.34 
 -2 12 -1 19.48 0.99 
 3 -12 1 0.78 0.65 
 -3 -12 -1 0.52 0.33 
 3 -12 1 1 0.43 
 -3 -12 -1 1.2 0.63 
 -3 -12 -1 0.34 0.4 
 3 -12 1 0.99 0.47 
 -3 12 -1 0.59 0.62 
 3 12 1 1.99 0.58 
 -3 12 -1 0.63 0.41 
 4 -12 1 22.4 1.19 
 4 -12 1 25.29 1.6 
 -4 -12 -1 21.93 1.02 
 -4 -12 -1 24.83 1.52 
 -4 -12 -1 23.03 1.15 
 4 -12 1 21.79 1.31 
 -4 12 -1 22.72 1.52 
 4 12 1 20.73 1.27 
 -5 -12 -1 3.85 0.59 
 -5 -12 -1 3.5 0.5 
 5 -12 1 3.52 0.61 
 -5 -12 -1 3.98 0.61 
 -5 -12 -1 4.33 0.94 
 5 -12 1 4.49 0.78 
 5 -12 1 3.57 0.9 
 -5 12 -1 4.15 0.76 
 5 12 1 3.06 0.71 
 -6 -12 -1 7.14 1.07 
 -6 -12 -1 5.6 0.73 
 -6 -12 -1 6.33 0.64 
 6 -12 1 4.56 0.97 
 -6 -12 -1 5.46 0.61 
 6 -12 1 5.05 0.75 
 -6 12 -1 4.82 0.87 
 6 12 1 5.11 0.82 
 -7 -12 -1 4.02 0.62 
 7 -12 1 5.18 0.99 
 7 -12 1 5.22 0.77 
 -7 -12 -1 3.9 0.97 
 -7 -12 -1 6.15 0.78 
 7 12 1 4.96 0.85 
 -7 12 -1 5.26 0.97 
 8 -12 1 1 0.81 
 -8 -12 -1 0 0.49 
 8 -12 1 0.8 0.6 
 -8 -12 -1 1.48 0.86 
 -8 -12 -1 0.34 0.55 
 -8 12 -1 1.07 0.77 
 8 12 1 -0.15 0.62 
 -9 -12 -1 0.94 0.95 
 9 -12 1 1.26 0.71 
 -9 -12 -1 1.26 0.58 
 -9 -12 -1 2.48 0.72 
 9 -12 1 0.56 0.81 
 9 12 1 2.25 0.8 
 -9 12 -1 3.46 1.03 
 -10 -12 -1 0.06 0.69 
 -10 -12 -1 1.02 0.98 
 -10 -12 -1 0.33 0.6 
 10 -12 1 -0.76 0.69 
 -10 12 -1 0.17 0.9 
 -11 -12 -1 -0.89 0.95 
 11 -12 1 1.16 0.91 
 -11 -12 -1 0.76 0.7 
 -11 -12 -1 1.01 0.88 
 -11 12 -1 1.9 0.97 
 -12 -12 -1 0.15 0.74 
 -12 -12 -1 0.12 0.97 
 -12 -12 -1 1.58 0.99 
 -12 12 -1 -0.77 0.94 
 -11 -13 1 0.5 0.64 
 -11 -13 1 2.09 1.15 
 -11 -13 1 0.65 0.88 
 -11 13 1 1.29 0.99 
 10 -13 -1 4.11 0.94 
 -10 -13 1 2.62 0.7 
 -10 -13 1 1.77 1.12 
 10 -13 -1 1.52 0.91 
 -10 -13 1 3.12 0.88 
 -10 13 1 2.43 1.03 
 10 13 -1 1.71 0.98 
 9 -13 -1 0.8 0.88 
 -9 -13 1 1.58 0.56 
 -9 -13 1 1.84 0.78 
 9 -13 -1 2.03 0.82 
 -9 -13 1 0.68 0.91 
 -9 13 1 0.01 0.78 
 9 13 -1 1.33 0.89 
 8 -13 -1 7.66 1.02 
 -8 -13 1 7.75 1.3 
 8 -13 -1 7.56 1.19 
 -8 -13 1 7.8 0.75 
 -8 -13 1 7.85 1.05 
 -8 13 1 7.9 1.11 
 8 13 -1 8.06 1.13 
 -7 -13 1 1.3 0.57 
 7 -13 -1 1.65 0.73 
 -7 -13 1 1.34 0.54 
 -7 -13 1 1.51 0.89 
 7 -13 -1 0.54 0.78 
 -7 -13 1 0.38 0.38 
 -7 13 1 1.23 0.72 
 7 13 -1 0.64 0.64 
 6 -13 -1 5.64 1.02 
 -6 -13 1 8.1 0.9 
 -6 -13 1 6.14 1.05 
 -6 -13 1 6.77 0.56 
 -6 -13 1 7.34 0.81 
 6 -13 -1 7.61 0.95 
 -6 13 1 6.31 0.93 
 6 13 -1 5.91 0.96 
 -5 -13 1 2.29 0.6 
 5 -13 -1 1.57 0.71 
 -5 -13 1 1.27 0.56 
 5 -13 -1 2.23 0.64 
 -5 -13 1 2.65 0.34 
 -5 -13 1 1.8 0.8 
 -5 13 1 1.13 0.6 
 5 13 -1 1.69 0.67 
 4 -13 -1 4.47 0.93 
 -4 -13 1 5.72 0.76 
 -4 -13 1 7.03 0.97 
 4 -13 -1 5.71 0.81 
 -4 -13 1 5.1 0.39 
 -4 -13 1 4.97 0.7 
 4 13 -1 5.78 0.88 
 -3 -13 1 0.8 0.6 
 3 -13 -1 1.58 0.57 
 -3 -13 1 0.94 0.48 
 -3 -13 1 0.63 0.24 
 3 13 -1 0.06 0.56 
 -3 13 1 0.89 0.65 
 -2 -13 1 0.34 0.51 
 -2 -13 1 0.32 0.43 
 2 -13 -1 -0.85 0.45 
 2 13 -1 0.16 0.57 
 -2 13 1 -0.59 0.54 
 -2 13 1 0.63 0.38 
 -1 -13 1 0.89 0.51 
 1 -13 -1 1.74 0.56 
 1 13 -1 0.88 0.63 
 -1 13 1 0.23 0.57 
 0 -13 1 26.6 1.36 
 0 -13 -1 25.69 1.42 
 0 13 1 26.98 1.53 
 0 13 -1 26.14 1.55 
 -1 -13 -1 6.06 0.57 
 -1 -13 -1 6.32 0.61 
 -1 -13 -1 5.74 0.82 
 1 -13 1 4.56 0.66 
 1 -13 1 4.57 0.84 
 -1 -13 -1 5.37 0.58 
 -1 13 -1 5.1 0.89 
 1 13 1 6.07 0.89 
 -2 -13 -1 25.3 1.44 
 2 -13 1 22.9 1.55 
 -2 -13 -1 23.43 1.05 
 2 -13 1 23.76 1.23 
 -2 -13 -1 22.27 1.08 
 -2 13 -1 23.17 1.51 
 2 13 1 21.41 1.35 
 3 -13 1 0.43 0.5 
 -3 -13 -1 -0.09 0.59 
 -3 -13 -1 0.43 0.32 
 3 -13 1 0.84 0.48 
 -3 -13 -1 -0.82 0.35 
 3 -13 1 0.74 0.66 
 3 13 1 0.1 0.54 
 -3 13 -1 0.6 0.64 
 -4 -13 -1 2.88 0.82 
 4 -13 1 3.16 0.64 
 4 -13 1 2.73 0.78 
 4 -13 1 2.88 0.59 
 -4 -13 -1 3.07 0.46 
 -4 -13 -1 2.87 0.56 
 4 13 1 3.48 0.72 
 -4 13 -1 3.23 0.82 
 5 -13 1 6.2 1 
 -5 -13 -1 5 0.69 
 5 -13 1 4.75 0.68 
 -5 -13 -1 4.8 0.57 
 -5 -13 -1 6.2 1.02 
 -5 -13 -1 5.05 0.67 
 5 13 1 4.36 0.81 
 -5 13 -1 6.24 1.01 
 -6 -13 -1 1.82 0.87 
 -6 -13 -1 2.04 0.49 
 6 -13 1 1.61 0.82 
 -6 -13 -1 1.91 0.54 
 6 -13 1 2.57 0.65 
 -6 -13 -1 2.2 0.56 
 -6 13 -1 2.41 0.76 
 6 13 1 2.23 0.7 
 -7 -13 -1 1.08 0.86 
 7 -13 1 -1.15 0.66 
 -7 -13 -1 0.38 0.44 
 7 -13 1 -0.16 0.54 
 -7 -13 -1 0.95 0.51 
 -7 13 -1 -0.37 0.73 
 7 13 1 0.3 0.61 
 8 -13 1 3.73 0.73 
 8 -13 1 2.24 0.93 
 -8 -13 -1 1.55 0.97 
 -8 -13 -1 0.88 0.61 
 -8 -13 -1 2.15 0.59 
 8 13 1 1.37 0.76 
 -8 13 -1 2.26 0.92 
 9 -13 1 0.71 0.82 
 9 -13 1 0.43 0.69 
 -9 -13 -1 0.23 0.57 
 -9 -13 -1 0.75 0.64 
 -9 -13 -1 1.72 0.95 
 -9 13 -1 0.28 0.81 
 9 13 1 -0.05 0.73 
 -10 -13 -1 8.04 0.99 
 -10 -13 -1 10.53 1.42 
 -10 -13 -1 11.47 1.28 
 10 -13 1 10.28 1.38 
 -10 13 -1 9.45 1.48 
 -11 -13 -1 0.58 0.84 
 -11 -13 -1 -0.81 0.97 
 -11 -13 -1 -0.28 0.6 
 11 -13 1 -0.81 0.84 
 -11 13 -1 2.53 0.97 
 -11 -14 1 1.8 0.94 
 -11 -14 1 0.48 0.66 
 -11 -14 1 1.84 1.17 
 -11 14 1 0.67 0.96 
 10 -14 -1 0.58 0.88 
 -10 -14 1 1.13 0.62 
 -10 -14 1 2.12 1.17 
 -10 -14 1 2 0.89 
 10 -14 -1 1.48 0.88 
 10 14 -1 1.45 0.97 
 -10 14 1 2.09 1.01 
 9 -14 -1 -0.44 0.69 
 -9 -14 1 1.2 0.69 
 -9 -14 1 -0.3 0.88 
 -9 -14 1 0.4 0.5 
 9 -14 -1 0.79 0.91 
 -9 14 1 1.79 0.88 
 9 14 -1 -0.25 0.82 
 8 -14 -1 8.76 1.13 
 8 -14 -1 8.35 1.2 
 -8 -14 1 7.13 0.69 
 -8 -14 1 7.38 1.01 
 -8 -14 1 7.33 1.27 
 -8 14 1 7.62 1.15 
 8 14 -1 4.86 1.02 
 -7 -14 1 0.17 0.37 
 -7 -14 1 -0.03 0.55 
 7 -14 -1 0.96 0.69 
 7 -14 -1 -0.41 0.77 
 -7 -14 1 -0.43 0.79 
 7 14 -1 1 0.73 
 -7 14 1 -0.51 0.63 
 6 -14 -1 4.37 0.84 
 -6 -14 1 3.33 0.42 
 6 -14 -1 4.42 0.92 
 -6 -14 1 3.33 0.97 
 -6 -14 1 3.32 0.69 
 -6 -14 1 3.52 0.71 
 -6 14 1 4.22 0.86 
 6 14 -1 2.81 0.82 
 -5 -14 1 10.58 1.2 
 -5 -14 1 9.12 0.96 
 -5 -14 1 8.78 0.94 
 5 -14 -1 9.44 1.01 
 -5 -14 1 9.09 0.56 
 5 -14 -1 10.03 1.31 
 5 14 -1 9.42 1.13 
 -4 -14 1 -0.06 0.48 
 4 -14 -1 0.25 0.72 
 -4 -14 1 0.35 0.68 
 -4 -14 1 0.71 0.52 
 4 -14 -1 1.29 0.59 
 -4 -14 1 0.49 0.24 
 -4 14 1 0.86 0.7 
 4 14 -1 -0.26 0.6 
 3 -14 -1 22.75 1.38 
 3 -14 -1 21.99 1.54 
 -3 -14 1 21.27 1.23 
 -3 -14 1 22.91 1.42 
 3 14 -1 20.11 1.43 
 -3 14 1 20.78 1.51 
 -2 -14 1 10.24 1.02 
 2 -14 -1 12.69 1.08 
 -2 -14 1 11.26 0.91 
 2 14 -1 10 1.14 
 -2 14 1 11.98 1.25 
 -1 -14 1 5.62 0.79 
 1 -14 -1 6.31 0.84 
 -1 14 1 4.4 0.86 
 1 14 -1 6.68 0.97 
 0 -14 1 10.26 1.24 
 0 -14 1 13.13 1.07 
 0 -14 -1 11.18 1.07 
 0 14 1 14.03 1.29 
 0 14 -1 12.53 1.25 
 1 -14 1 1.68 0.53 
 -1 -14 -1 2.17 0.67 
 -1 -14 -1 1.92 0.46 
 1 -14 1 2.07 0.74 
 -1 14 -1 0.98 0.73 
 1 14 1 1.68 0.72 
 2 -14 1 2.26 0.58 
 -2 -14 -1 2.39 0.5 
 -2 -14 -1 1.76 0.44 
 2 -14 1 2.55 0.84 
 -2 -14 -1 1.8 0.7 
 -2 14 -1 1.55 0.75 
 2 14 1 2.06 0.71 
 -3 -14 -1 5.49 0.54 
 -3 -14 -1 4.7 0.91 
 3 -14 1 4.99 0.69 
 -3 -14 -1 5.64 0.65 
 3 -14 1 3.61 0.85 
 -3 14 -1 3.7 0.94 
 3 14 1 3.6 0.78 
 4 -14 1 12.01 1.36 
 4 -14 1 14.56 1.09 
 -4 -14 -1 11.65 1.24 
 -4 -14 -1 14.29 0.84 
 -4 -14 -1 12.1 0.95 
 4 14 1 13.88 1.26 
 -4 14 -1 14.91 1.47 
 5 -14 1 9.35 0.92 
 -5 -14 -1 7.86 0.84 
 -5 -14 -1 9.6 0.91 
 -5 -14 -1 7.96 1.18 
 -5 -14 -1 8.79 0.71 
 5 -14 1 9.31 1.28 
 5 14 1 7.95 0.99 
 -5 14 -1 8.76 1.29 
 6 -14 1 2.16 0.89 
 6 -14 1 2.18 0.66 
 -6 -14 -1 1.05 0.52 
 -6 -14 -1 1.27 0.46 
 -6 -14 -1 1.92 0.57 
 -6 -14 -1 2.27 0.92 
 -6 14 -1 2.69 0.89 
 6 14 1 0.27 0.63 
 -7 -14 -1 8.53 0.95 
 7 -14 1 5.89 0.86 
 7 -14 1 7.66 1.29 
 -7 -14 -1 7.75 0.77 
 -7 -14 -1 7.47 1.17 
 7 14 1 8.14 1.06 
 -7 14 -1 8.28 1.21 
 8 -14 1 -0.75 0.59 
 -8 -14 -1 -1.04 0.85 
 -8 -14 -1 0.12 0.54 
 -8 -14 -1 -0.51 0.47 
 8 -14 1 0.26 0.81 
 -8 14 -1 -0.66 0.76 
 8 14 1 -0.13 0.64 
 9 -14 1 3.35 1.08 
 -9 -14 -1 1.59 1.08 
 -9 -14 -1 5.5 0.92 
 -9 -14 -1 3.35 0.73 
 -9 14 -1 4.5 1.12 
 9 14 1 4.41 1.03 
 -10 -14 -1 -0.78 0.59 
 10 -14 1 0.16 0.9 
 -10 -14 -1 -0.6 1 
 10 14 1 -0.23 0.81 
 -10 14 -1 0.82 0.87 
 -11 -14 -1 1.58 1.15 
 11 -14 1 -0.33 0.92 
 -11 -14 -1 0.1 0.64 
 -11 14 -1 -0.6 0.94 
 -10 -15 1 0.15 0.96 
 10 -15 -1 0.32 0.96 
 -10 -15 1 2.5 1.01 
 -10 -15 1 1.06 0.57 
 -10 15 1 1.19 0.98 
 10 15 -1 0.23 0.96 
 -9 -15 1 0.23 0.97 
 9 -15 -1 1.96 0.91 
 -9 -15 1 1.64 0.55 
 -9 -15 1 3.91 0.94 
 9 -15 -1 3.4 1.07 
 9 15 -1 0.67 0.9 
 -9 15 1 2.55 0.97 
 -8 -15 1 -1.21 0.94 
 8 -15 -1 -0.19 0.85 
 -8 -15 1 0.37 0.42 
 8 -15 -1 0.85 0.76 
 -8 -15 1 0.32 0.61 
 -8 15 1 0.06 0.78 
 8 15 -1 0.24 0.73 
 -7 -15 1 1.63 0.4 
 -7 -15 1 0.71 0.6 
 7 -15 -1 1.72 0.94 
 -7 -15 1 1.25 0.94 
 7 -15 -1 1.42 0.73 
 7 15 -1 1.89 0.81 
 -7 15 1 1.26 0.76 
 -6 -15 1 2.17 0.68 
 -6 -15 1 3.37 0.72 
 -6 -15 1 4.27 1.04 
 -6 -15 1 3.11 0.39 
 6 -15 -1 3.72 1.09 
 6 -15 -1 2.22 0.75 
 6 15 -1 3.28 0.88 
 -5 -15 1 7.86 0.95 
 5 -15 -1 8.47 1.01 
 -5 -15 1 11.04 1.3 
 -5 -15 1 8.38 0.95 
 -5 -15 1 8.8 0.51 
 5 -15 -1 9.69 1.34 
 -5 15 1 9.56 1.34 
 5 15 -1 6.49 1.05 
 4 -15 -1 0.39 0.71 
 -4 -15 1 1.25 0.58 
 -4 -15 1 1.87 0.8 
 4 -15 -1 1.53 0.68 
 4 15 -1 1.4 0.73 
 -4 15 1 1.94 0.84 
 3 -15 -1 6.17 0.89 
 -3 -15 1 6.27 0.79 
 -3 -15 1 6.2 0.92 
 3 -15 -1 5.91 1.07 
 -3 15 1 6.09 1.07 
 3 15 -1 5.17 0.94 
 -2 -15 1 2.63 0.6 
 -2 -15 1 3.12 0.73 
 2 -15 -1 4.4 0.8 
 -2 15 1 1.48 0.77 
 2 15 -1 2.72 0.81 
 -1 -15 1 0.84 0.57 
 1 -15 -1 0.74 0.6 
 1 15 -1 0.8 0.73 
 -1 15 1 1.42 0.74 
 0 -15 1 0.27 0.67 
 0 -15 -1 1.5 0.68 
 0 -15 1 1.52 0.58 
 0 15 -1 0.46 0.73 
 0 15 1 0.41 0.68 
 1 -15 1 9.27 1.25 
 -1 -15 -1 9.52 1.05 
 1 -15 1 10.94 1.01 
 -1 -15 -1 10.55 0.82 
 -1 15 -1 8.78 1.15 
 1 15 1 13.31 1.3 
 2 -15 1 1.06 0.77 
 -2 -15 -1 -0.43 0.36 
 2 -15 1 -0.16 0.47 
 -2 -15 -1 -0.04 0.4 
 -2 -15 -1 0.8 0.67 
 -2 15 -1 1.21 0.82 
 2 15 1 1.11 0.68 
 -3 -15 -1 23.68 1.14 
 -3 -15 -1 25.74 1.66 
 -3 -15 -1 24.48 1.25 
 3 -15 1 26.01 1.38 
 3 15 1 23.22 1.54 
 -3 15 -1 23.81 1.72 
 4 -15 1 2.63 0.97 
 4 -15 1 2.79 0.65 
 -4 -15 -1 1.6 0.56 
 -4 -15 -1 1.42 0.43 
 -4 -15 -1 2.01 0.84 
 4 15 1 0.97 0.68 
 -4 15 -1 2.14 0.9 
 -5 -15 -1 1.41 0.61 
 -5 -15 -1 1.53 0.56 
 -5 -15 -1 -0.24 0.77 
 -5 -15 -1 1.42 0.43 
 5 -15 1 2.19 0.66 
 5 -15 1 0.95 0.88 
 -5 15 -1 1.47 0.86 
 5 15 1 1.63 0.69 
 6 -15 1 0.91 0.61 
 -6 -15 -1 0.85 0.45 
 -6 -15 -1 1.63 0.96 
 -6 -15 -1 0.41 0.5 
 6 -15 1 0.37 0.86 
 6 15 1 0.37 0.68 
 -6 15 -1 0.32 0.89 
 -7 -15 -1 3.65 0.62 
 -7 -15 -1 3.21 1.07 
 7 -15 1 4.01 0.81 
 7 -15 1 2.93 0.99 
 -7 15 -1 2.96 1.01 
 7 15 1 2.72 0.81 
 -8 -15 -1 1.58 0.98 
 8 -15 1 0.15 0.89 
 -8 -15 -1 1.62 0.58 
 8 15 1 1.27 0.79 
 -8 15 -1 1.91 0.99 
 9 -15 1 7.05 1.31 
 -9 -15 -1 5.75 0.82 
 -9 -15 -1 7.15 1.4 
 -9 15 -1 8.74 1.36 
 9 15 1 7.93 1.25 
 10 -15 1 2.12 1.12 
 -10 -15 -1 2.18 0.71 
 -10 -15 -1 1.35 1.07 
 -10 15 -1 0.7 1 
 -10 -16 1 1.19 1.08 
 -10 -16 1 0.87 0.54 
 10 -16 -1 0.37 0.99 
 -10 16 1 0.29 0.94 
 10 16 -1 0.9 1.04 
 9 -16 -1 1.14 1.03 
 -9 -16 1 1.52 0.51 
 -9 -16 1 3.87 1.22 
 9 16 -1 1.71 0.99 
 -9 16 1 2.69 1.02 
 8 -16 -1 0.83 0.82 
 8 -16 -1 4.93 1.19 
 -8 -16 1 4.09 0.52 
 -8 -16 1 3.7 1.12 
 -8 16 1 1.73 0.86 
 8 16 -1 3.43 0.97 
 -7 -16 1 -0.17 0.32 
 7 -16 -1 1.43 0.8 
 7 -16 -1 -0.48 0.81 
 -7 -16 1 0.54 0.64 
 -7 -16 1 -1.45 0.89 
 7 16 -1 -0.78 0.7 
 6 -16 -1 1.08 0.92 
 -6 -16 1 0.31 0.71 
 6 -16 -1 0.25 0.7 
 -6 -16 1 0.42 0.26 
 -6 -16 1 -0.85 0.81 
 -6 -16 1 -0.37 0.54 
 -6 16 1 0.63 0.9 
 6 16 -1 -1.05 0.64 
 -5 -16 1 8.38 1.25 
 -5 -16 1 6.9 0.93 
 -5 -16 1 7.79 0.45 
 5 -16 -1 6.55 1.26 
 5 -16 -1 9.28 1.08 
 -5 -16 1 8.85 1.03 
 5 16 -1 9.12 1.23 
 -5 16 1 8.49 1.3 
 4 -16 -1 9.64 1.11 
 -4 -16 1 10.12 1.19 
 4 -16 -1 6.52 1.24 
 -4 -16 1 8.63 0.99 
 -4 -16 1 8.33 0.94 
 4 16 -1 5.2 1.01 
 -4 16 1 8.54 1.26 
 3 -16 -1 18.75 1.34 
 -3 -16 1 16.44 1.22 
 3 -16 -1 17.23 1.7 
 -3 -16 1 21.18 1.46 
 3 16 -1 14.4 1.44 
 -3 16 1 17.2 1.6 
 -2 -16 1 1.82 0.72 
 2 -16 -1 1.65 0.68 
 -2 -16 1 -0.23 0.48 
 -2 16 1 -0.89 0.67 
 2 16 -1 -0.15 0.71 
 1 -16 -1 2.02 0.74 
 -1 -16 1 0.97 0.64 
 -1 -16 1 0.78 0.79 
 -1 16 1 2.37 0.85 
 1 16 -1 1.42 0.83 
 0 -16 1 13.44 1.17 
 0 -16 1 12.04 1.32 
 0 -16 -1 15.43 1.35 
 0 16 1 11.62 1.28 
 0 16 -1 12.55 1.38 
 1 -16 1 2.63 0.92 
 1 -16 1 4.6 0.76 
 -1 -16 -1 2.36 0.54 
 -1 -16 -1 3.52 0.84 
 -1 16 -1 2.44 0.88 
 1 16 1 1.65 0.78 
 -2 -16 -1 -0.27 0.44 
 2 -16 1 1.17 0.58 
 2 -16 1 -0.49 0.63 
 -2 -16 -1 -0.57 0.65 
 -2 16 -1 0.39 0.75 
 2 16 1 -0.37 0.66 
 -3 -16 -1 2.86 0.87 
 3 -16 1 3.42 0.71 
 -3 -16 -1 2.31 0.47 
 -3 -16 -1 1.88 0.9 
 3 -16 1 2.57 0.88 
 -3 16 -1 0.51 0.81 
 3 16 1 2.38 0.78 
 -4 -16 -1 0.95 0.83 
 4 -16 1 2.14 0.96 
 4 -16 1 2.08 0.65 
 -4 -16 -1 1.45 0.43 
 -4 16 -1 1.63 0.95 
 4 16 1 2.71 0.83 
 -5 -16 -1 23.65 1.76 
 -5 -16 -1 19.56 1.03 
 5 -16 1 21.34 1.39 
 5 -16 1 14.33 1.57 
 -5 -16 -1 18.81 1.29 
 -5 16 -1 19.59 1.86 
 5 16 1 20.07 1.53 
 -6 -16 -1 -0.2 0.86 
 6 -16 1 0.03 0.62 
 -6 -16 -1 0.28 0.42 
 6 -16 1 -0.03 0.89 
 6 16 1 -0.02 0.66 
 -6 16 -1 -1.02 0.88 
 -7 -16 -1 24.66 1.27 
 -7 -16 -1 24.22 2.04 
 7 -16 1 23.95 2.13 
 -7 16 -1 28.41 2.38 
 7 16 1 21.6 1.6 
 -8 -16 -1 -1 0.96 
 -8 -16 -1 0.23 0.52 
 8 -16 1 -0.77 0.95 
 8 16 1 0.56 0.77 
 -8 16 -1 0.99 1.05 
 9 -16 1 8.53 1.49 
 -9 -16 -1 4.46 0.75 
 -9 -16 -1 6.88 1.47 
 9 16 1 4.96 1.15 
 -9 -17 1 0.2 0.39 
 -9 -17 1 1.82 1.15 
 9 -17 -1 0.58 1 
 9 17 -1 1.06 0.97 
 -9 17 1 -0.9 0.77 
 8 -17 -1 1.98 1.09 
 -8 -17 1 3.03 0.44 
 -8 -17 1 4.08 1.26 
 8 17 -1 1.55 0.95 
 -7 -17 1 3.64 0.38 
 7 -17 -1 4.54 0.96 
 -7 -17 1 3.57 1.13 
 7 -17 -1 4.03 1.23 
 7 17 -1 3.29 1.02 
 -7 17 1 3.43 1.15 
 -6 -17 1 2.33 0.97 
 6 -17 -1 1.86 0.83 
 6 -17 -1 -1.22 0.89 
 -6 17 1 0.84 1.01 
 6 17 -1 1.05 0.82 
 5 -17 -1 11.16 1.5 
 -5 -17 1 11.19 1.16 
 5 -17 -1 15.57 1.38 
 -5 -17 1 13.83 1.48 
 5 17 -1 10.96 1.39 
 -5 17 1 10.41 1.47 
 -4 -17 1 0.26 0.61 
 4 -17 -1 -0.14 0.66 
 -4 -17 1 1.08 0.66 
 4 -17 -1 1.31 0.86 
 -4 -17 1 0.07 0.69 
 -4 17 1 -0.19 0.79 
 4 17 -1 -0.89 0.72 
 -3 -17 1 3.05 0.84 
 -3 -17 1 2.97 0.7 
 3 -17 -1 3.05 0.85 
 3 -17 -1 2.83 1.03 
 3 17 -1 2.76 0.92 
 -3 17 1 3.14 0.95 
 -2 -17 1 -0.35 0.75 
 2 -17 -1 0.7 0.71 
 -2 -17 1 1.19 0.7 
 2 -17 -1 1.61 0.91 
 -2 -17 1 0.79 0.56 
 2 17 -1 -0.79 0.73 
 -2 17 1 0.05 0.76 
 1 -17 -1 17.72 1.45 
 -1 -17 1 16.87 1.7 
 -1 -17 1 17.92 1.39 
 1 17 -1 15.48 1.57 
 -1 17 1 17.58 1.61 
 0 -17 1 2.04 0.86 
 0 -17 -1 1.68 0.75 
 0 -17 1 2.42 0.71 
 0 17 -1 2.71 0.95 
 0 17 1 3.24 0.89 
 -1 -17 -1 5.03 0.97 
 1 -17 1 3.84 0.76 
 1 -17 1 2.39 0.92 
 -1 17 -1 2.86 0.96 
 1 17 1 3.88 0.98 
 2 -17 1 1.84 0.68 
 2 -17 1 1.93 0.91 
 -2 -17 -1 2.54 0.9 
 2 17 1 1.9 0.85 
 -2 17 -1 2.5 1.02 
 3 -17 1 0.71 0.62 
 -3 -17 -1 -0.07 0.41 
 3 -17 1 0.61 0.79 
 -3 -17 -1 -1.22 0.65 
 3 17 1 0.88 0.73 
 -3 17 -1 0.81 0.94 
 4 -17 1 3 1.01 
 -4 -17 -1 4.56 0.58 
 4 -17 1 5.75 0.87 
 -4 -17 -1 6.31 1.15 
 4 17 1 4.31 0.98 
 -4 17 -1 4.51 1.2 
 -5 -17 -1 5.18 1.1 
 5 -17 1 2.61 1.13 
 -5 -17 -1 4.34 0.56 
 5 -17 1 3.39 0.82 
 5 17 1 4 0.94 
 -5 17 -1 5.82 1.32 
 -6 -17 -1 -0.74 0.85 
 -6 -17 -1 -0.04 0.41 
 6 -17 1 0.3 0.98 
 -6 17 -1 2.01 1.07 
 6 17 1 0.02 0.69 
 -7 -17 -1 -0.43 0.42 
 -7 -17 -1 -0.47 0.97 
 7 -17 1 -0.95 0.95 
 7 17 1 0.16 0.74 
 -7 17 -1 -0.94 0.88 
 -8 -17 -1 6.86 1.36 
 8 -17 1 7.23 1.44 
 -8 -17 -1 7.71 0.79 
 -8 17 -1 3.99 1.31 
 8 17 1 5.36 1.08 
 9 -17 1 4.48 1.24 
 -9 -17 -1 5.9 1.37 
 -9 -17 -1 4.54 0.73 
 -9 17 -1 5.78 1.45 
 -8 -18 1 0.4 1.07 
 8 -18 -1 0.87 1.05 
 8 18 -1 0.96 0.92 
 -8 18 1 -0.27 1.02 
 7 -18 -1 1.76 1.16 
 -7 -18 1 0.1 1.01 
 7 18 -1 -0.36 0.85 
 -7 18 1 0.47 1.12 
 6 -18 -1 2.6 0.91 
 -6 -18 1 2.21 1.01 
 6 -18 -1 0.92 1.09 
 6 18 -1 1.09 0.89 
 -6 18 1 2.63 1.14 
 5 -18 -1 7.01 1.4 
 5 -18 -1 6.78 1.06 
 -5 -18 1 7.68 1.08 
 -5 -18 1 5.82 1.18 
 5 18 -1 5.39 1.13 
 -5 18 1 6.68 1.34 
 -4 -18 1 10.34 1.31 
 4 -18 -1 10.91 1.22 
 -4 -18 1 12.57 1.3 
 4 -18 -1 9.98 1.52 
 4 18 -1 11.05 1.43 
 -4 18 1 10.38 1.5 
 -3 -18 1 0.34 0.75 
 -3 -18 1 0.63 0.79 
 3 -18 -1 1.17 0.77 
 3 -18 -1 0.89 0.91 
 3 18 -1 -0.2 0.77 
 -3 18 1 -0.16 0.81 
 2 -18 -1 4.68 0.93 
 -2 -18 1 2.82 0.81 
 -2 -18 1 2.13 0.92 
 2 -18 -1 1.9 0.99 
 2 18 -1 2.9 0.99 
 -2 18 1 3.16 1.05 
 1 -18 -1 0.64 0.72 
 -1 -18 1 0.64 0.68 
 -1 -18 1 1.21 0.89 
 -1 -18 1 1.29 0.96 
 -1 18 1 2.07 0.94 
 1 18 -1 -0.3 0.78 
 0 -18 1 2.59 0.74 
 0 -18 -1 1.43 0.8 
 0 -18 1 1.12 0.89 
 0 18 1 1.63 0.89 
 0 18 -1 0.92 0.92 
 1 -18 1 -0.58 0.87 
 1 -18 1 1.85 0.68 
 -1 -18 -1 0.39 0.76 
 1 18 1 0.19 0.79 
 -1 18 -1 0.06 0.81 
 2 -18 1 4.74 1.16 
 -2 -18 -1 5.39 1.05 
 2 -18 1 6 0.91 
 -2 18 -1 1.69 1.04 
 2 18 1 4.03 1 
 -3 -18 -1 0.74 0.82 
 3 -18 1 -0.81 0.87 
 3 -18 1 0.58 0.64 
 3 18 1 -0.19 0.69 
 -3 18 -1 0.23 0.91 
 -4 -18 -1 0.04 0.85 
 4 -18 1 0.18 0.84 
 -4 -18 -1 -0.55 0.38 
 4 -18 1 0.3 0.67 
 4 18 1 -0.52 0.69 
 -4 18 -1 0.11 0.93 
 5 -18 1 10.97 1.62 
 -5 -18 -1 11.18 1.43 
 -5 -18 -1 13.07 0.89 
 -5 18 -1 12.12 1.71 
 5 18 1 12.05 1.37 
 6 -18 1 0.15 0.94 
 -6 -18 -1 0.07 0.96 
 -6 -18 -1 0.32 0.42 
 -6 18 -1 0 1.04 
 6 18 1 0.55 0.77 
 -7 -18 -1 14.91 1.71 
 7 -18 1 13.18 1.73 
 -7 -18 -1 13.9 0.95 
 7 18 1 12.49 1.45 
 -7 18 -1 12.25 1.71 
 -8 -18 -1 2.31 1.21 
 -8 -18 -1 4.02 0.65 
 8 -18 1 2.54 1.14 
 8 18 1 2.74 0.95 
 -8 18 -1 3.66 1.44 
 -7 -19 1 2.64 0.99 
 7 -19 -1 1.88 1.23 
 -7 -19 1 3.38 1.19 
 7 19 -1 3.43 1.09 
 -7 19 1 2.54 1.3 
 -6 -19 1 6.96 1.25 
 -6 -19 1 5.38 1.2 
 6 -19 -1 8.13 1.53 
 6 19 -1 4.54 1.17 
 -6 19 1 5.85 1.42 
 5 -19 -1 4.22 1 
 5 -19 -1 3.86 1.23 
 -5 -19 1 3.01 0.96 
 -5 -19 1 2.55 1.06 
 -5 19 1 1.95 1.17 
 5 19 -1 1.76 0.97 
 -4 -19 1 3.03 0.87 
 -4 -19 1 -0.12 0.74 
 4 -19 -1 1.92 0.84 
 -4 -19 1 2.14 0.93 
 4 -19 -1 2.17 1.08 
 4 19 -1 1.54 0.96 
 -4 19 1 1.4 1.11 
 -3 -19 1 5.12 1.2 
 3 -19 -1 3.51 0.92 
 3 -19 -1 3.37 1.17 
 -3 -19 1 3.78 1 
 -3 19 1 2.65 1.06 
 3 19 -1 3.19 1.06 
 -2 -19 1 2.87 1.08 
 -2 -19 1 5.74 1.06 
 2 -19 -1 3.5 1.05 
 2 -19 -1 4.3 0.99 
 -2 19 1 6.5 1.34 
 2 19 -1 2.73 1.04 
 -1 -19 1 6.75 1.05 
 1 -19 -1 5.49 1.19 
 1 -19 -1 7.63 1.13 
 -1 -19 1 5.79 1.18 
 -1 19 1 5.49 1.16 
 1 19 -1 6.72 1.23 
 0 -19 1 3.61 0.83 
 0 -19 1 1.12 0.94 
 0 -19 -1 1.56 0.87 
 0 19 1 0.72 0.91 
 0 19 -1 0.29 0.88 
 1 -19 1 0.74 0.69 
 1 -19 1 -0.56 0.94 
 -1 -19 -1 0.17 0.82 
 -1 19 -1 0.23 0.94 
 1 19 1 -0.52 0.8 
 2 -19 1 1.53 0.76 
 -2 -19 -1 0.92 0.84 
 2 -19 1 -1.77 0.87 
 2 19 1 0.29 0.87 
 -2 19 -1 -1.37 0.88 
 3 -19 1 -1.76 0.86 
 3 -19 1 -0.13 0.68 
 -3 -19 -1 -0.23 0.83 
 -3 19 -1 1.2 1.1 
 3 19 1 1.04 0.82 
 4 -19 1 6.14 1.41 
 -4 -19 -1 6.04 1.23 
 -4 19 -1 5.79 1.34 
 4 19 1 5.96 1.13 
 -5 -19 -1 0.59 0.42 
 5 -19 1 1.29 1.13 
 -5 -19 -1 1.3 1.04 
 5 19 1 2.18 0.9 
 -5 19 -1 0.36 1.07 
 -6 -19 -1 1.18 1.06 
 -6 -19 -1 -0.31 0.38 
 6 -19 1 -0.08 0.97 
 -6 19 -1 0.12 1.16 
 6 19 1 -0.56 0.73 
 7 -19 1 -1.04 1 
 -7 -19 -1 0.39 1.04 
 -7 -19 -1 1.39 0.45 
 -7 19 -1 0.23 1.16 
 7 19 1 1.06 0.89 
 -5 -20 1 1.32 0.92 
 5 -20 -1 1.13 1.18 
 -5 -20 1 -0.07 0.74 
 5 20 -1 0.98 0.96 
 -5 20 1 1.66 1.16 
 4 -20 -1 11.05 1.71 
 -4 -20 1 7.35 1.35 
 -4 -20 1 7.21 1.16 
 -4 -20 1 8.52 1.36 
 4 -20 -1 8.84 1.25 
 -4 20 1 8.38 1.52 
 4 20 -1 6.77 1.31 
 -3 -20 1 1.27 0.85 
 -3 -20 1 1.6 1.01 
 3 -20 -1 1.51 1.19 
 3 -20 -1 1.07 0.85 
 3 20 -1 1.78 1 
 -3 20 1 -0.11 1.01 
 2 -20 -1 1.93 1.15 
 2 -20 -1 1.38 0.84 
 -2 -20 1 3.41 0.95 
 -2 -20 1 2.5 1.02 
 -2 20 1 2.34 1.11 
 2 20 -1 0.35 0.95 
 1 -20 -1 3.34 0.96 
 -1 -20 1 3.39 1.19 
 1 -20 -1 3.28 1.24 
 -1 -20 1 4.33 0.94 
 -1 20 1 4.68 1.2 
 1 20 -1 2.87 1.12 
 0 -20 1 1.19 0.79 
 0 -20 -1 1.97 0.89 
 0 -20 1 0.19 1.03 
 0 -20 -1 -0.91 0.86 
 0 20 -1 1.32 1.1 
 0 20 1 -0.14 0.85 
 1 -20 1 2.25 0.77 
 -1 -20 -1 0.49 0.89 
 1 -20 1 0.68 1.09 
 1 20 1 -0.3 0.92 
 -1 20 -1 0.39 1.03 
 2 -20 1 1.45 1.07 
 2 -20 1 0.96 0.75 
 -2 -20 -1 -0.05 0.85 
 2 20 1 -0.21 0.85 
 -2 20 -1 0.67 1.06 
 -3 -20 -1 0.22 0.96 
 3 -20 1 0.71 1.05 
 3 20 1 0.67 0.85 
 -3 20 -1 -1.32 0.95 
 -4 -20 -1 0.85 1 
 4 -20 1 0.94 1.13 
 -4 20 -1 -0.17 1.04 
 4 20 1 1.29 0.95 
 5 -20 1 0.23 1.14 
 -5 -20 -1 0.94 1.1 
 -5 20 -1 -1.11 1.03 
 5 20 1 0.66 0.88 
 -4 -21 1 0.45 0.92 
 -4 -21 1 -0.92 0.86 
 4 -21 -1 2.68 1.22 
 -4 21 1 -0.55 1.09 
 -3 -21 1 1.54 1.06 
 3 -21 -1 2.6 0.99 
 3 -21 -1 0.3 1.07 
 -3 -21 1 2.09 0.99 
 3 21 -1 1.9 1.06 
 -3 21 1 0.05 1.11 
 2 -21 -1 3.39 1.05 
 2 -21 -1 2.37 1.23 
 -2 -21 1 4.49 1.07 
 -2 -21 1 4.65 1.34 
 2 21 -1 3.88 1.15 
 -2 21 1 3.33 1.26 
 1 -21 -1 0.29 0.99 
 1 -21 -1 0.77 0.88 
 -1 -21 1 0.67 1.11 
 -1 -21 1 1.8 0.87 
 1 21 -1 0.71 1.09 
 -1 21 1 1 1.04 
 0 -21 -1 2.29 0.98 
 0 -21 1 3.23 0.88 
 0 -21 -1 2.84 1.23 
 0 -21 1 2.55 1.3 
 0 21 -1 0.64 1.04 
 0 21 1 -0.22 0.98 
 -1 -21 -1 1.67 1.07 
 1 -21 1 3.98 1.01 
 1 -21 1 0.8 1.14 
 -1 -21 -1 2.04 1.02 
 -1 21 -1 -0.88 1.01 
 1 21 1 1.83 1.01 
 -2 -21 -1 5.57 1.23 
 2 -21 1 9.8 1.54 
 -2 21 -1 8.48 1.51 
 2 21 1 7.08 1.34 
 3 -21 1 2.33 1.16 
 -3 -21 -1 3.1 1.1 
 3 21 1 1.72 1 
 -3 21 -1 3.38 1.3 
 -14 0 2 3.81 1.26 
 -14 0 2 3.57 1.35 
 -13 0 2 1.17 0.98 
 -13 0 2 1.26 0.98 
 -12 0 2 -0.7 0.52 
 -12 0 2 -1.12 0.88 
 -12 0 2 -0.78 0.78 
 -11 0 2 0.21 0.73 
 -11 0 2 -0.11 0.5 
 -11 0 2 0.44 0.75 
 -10 0 2 1.43 0.54 
 -10 0 2 1.47 0.71 
 -10 0 2 1.51 0.74 
 -9 0 2 0.67 0.56 
 -9 0 2 0.71 0.45 
 9 0 -2 0.24 0.2 
 -9 0 2 0.04 0.58 
 -8 0 2 48.29 2.08 
 -8 0 2 48.63 1.85 
 8 0 -2 46.11 1.49 
 -8 0 2 52.64 2.11 
 -7 0 2 -0.47 0.36 
 -7 0 2 -0.13 0.42 
 -7 0 2 -0.68 0.43 
 7 0 -2 -0.31 0.17 
 -6 0 2 69.43 2.46 
 6 0 -2 66.89 1.95 
 -6 0 2 66.81 2.38 
 5 0 -2 0.02 0.14 
 -5 0 2 -0.2 0.41 
 -5 0 2 0.14 0.43 
 -4 0 2 3.33 0.49 
 4 0 -2 4.26 0.59 
 4 0 -2 4.31 0.51 
 -4 0 2 3.36 0.48 
 -4 0 2 2.93 0.51 
 -3 0 2 0 0.35 
 3 0 -2 -0.14 0.33 
 3 0 -2 0.35 0.36 
 3 0 -2 -0.19 0.37 
 -3 0 2 -0.25 0.37 
 -3 0 2 0.08 0.34 
 2 0 -2 78.35 2.39 
 -2 0 2 82.66 2.39 
 2 0 -2 79.36 2.22 
 -2 0 2 78.23 2.39 
 2 0 -2 78.67 2.39 
 -2 0 2 77.92 2.39 
 2 0 -2 79.02 2.39 
 -2 0 2 79.96 2.22 
 1 0 -2 -0.18 0.18 
 1 0 -2 0.23 0.22 
 -1 0 2 0.07 0.18 
 -1 0 2 0.06 0.15 
 1 0 -2 0.01 0.03 
 -1 0 2 -0.1 0.21 
 1 0 -2 0.28 0.24 
 -1 0 2 0.05 0.07 
 1 0 -2 0.11 0.16 
 -1 0 2 -0.19 0.13 
 0 0 -2 49.21 1.47 
 0 0 -2 48.37 1.42 
 0 0 -2 48.76 1.49 
 -1 0 -2 -0.39 0.23 
 -1 0 -2 0.01 0.16 
 -1 0 -2 0.16 0.17 
 -1 0 -2 0.02 0.15 
 -1 0 -2 -0.01 0.24 
 1 0 2 0.33 0.2 
 1 0 2 0.03 0.18 
 1 0 2 -0.07 0.15 
 1 0 2 0.03 0.2 
 1 0 2 0.01 0.2 
 -2 0 -2 25.91 0.99 
 -2 0 -2 25.63 0.99 
 2 0 2 26.16 1.02 
 -2 0 -2 25.99 0.98 
 2 0 2 26.01 0.96 
 2 0 2 25.08 1 
 3 0 2 0.01 0.34 
 3 0 2 -0.4 0.38 
 -3 0 -2 0.19 0.37 
 -3 0 -2 0.44 0.34 
 -3 0 -2 -0.04 0.38 
 3 0 2 -0.33 0.36 
 4 0 2 3.04 0.51 
 -4 0 -2 4.05 0.48 
 4 0 2 4 0.55 
 -4 0 -2 2.87 0.49 
 -4 0 -2 3.94 0.52 
 4 0 2 3.42 0.48 
 4 0 2 3.75 0.35 
 -5 0 -2 -0.2 0.4 
 5 0 2 0.09 0.4 
 -5 0 -2 0.4 0.35 
 -5 0 -2 0.04 0.46 
 5 0 2 0.29 0.37 
 5 0 2 -0.2 0.25 
 -6 0 -2 113.24 3.63 
 6 0 2 107.98 3.45 
 6 0 2 112.52 3.3 
 -6 0 -2 111.13 3.45 
 -6 0 -2 110.56 3.61 
 -7 0 -2 0.04 0.52 
 7 0 2 -0.11 0.38 
 -7 0 -2 0.24 0.48 
 8 0 2 1.63 0.48 
 -8 0 -2 1.5 0.59 
 -8 0 -2 1.46 0.64 
 -9 0 -2 0.26 0.6 
 -9 0 -2 0.6 0.61 
 9 0 2 -0.28 0.41 
 -10 0 -2 3.6 0.84 
 10 0 2 3.57 0.63 
 -10 0 -2 3.42 0.87 
 -11 0 -2 0.47 0.75 
 -11 0 -2 1.27 0.82 
 -12 0 -2 42.43 2.46 
 -12 0 -2 39.15 2.31 
 -13 0 -2 0.34 0.9 
 -13 0 -2 0.26 1.04 
 -14 0 -2 6.95 1.37 
 -14 0 -2 5.84 1.43 
 -14 -1 2 5.88 1.32 
 -14 -1 2 5.31 1.44 
 -14 1 2 7.37 1.43 
 -14 1 2 5.45 1.42 
 -13 -1 2 7.16 1.4 
 -13 -1 2 7.58 1.3 
 -13 1 2 5.29 1.34 
 -13 1 2 5.14 1.23 
 -12 -1 2 11.15 1.36 
 -12 -1 2 12.17 1.43 
 -12 1 2 11.16 1.49 
 -12 1 2 12.31 1.54 
 -11 -1 2 3.22 0.66 
 -11 -1 2 4.36 0.99 
 -11 -1 2 4.69 1.02 
 -11 1 2 5.61 0.79 
 -11 1 2 5.38 1.03 
 -11 1 2 4.28 0.99 
 -10 -1 2 3.98 0.86 
 -10 -1 2 4.15 0.89 
 -10 -1 2 3.76 0.64 
 -10 1 2 3.43 0.69 
 -10 1 2 2.06 0.78 
 -10 1 2 3.22 0.85 
 -9 -1 2 2.9 0.71 
 9 -1 -2 1.9 0.31 
 -9 -1 2 2.18 0.78 
 -9 -1 2 1.14 0.48 
 -9 1 2 1.73 0.65 
 -9 1 2 1.86 0.75 
 -9 1 2 2.59 0.6 
 -8 -1 2 19.82 1.36 
 -8 -1 2 19.54 1.07 
 8 -1 -2 19.21 0.81 
 -8 -1 2 18.71 1.25 
 -8 1 2 20.98 1.33 
 -8 1 2 21.16 1.14 
 -8 1 2 18.3 1.34 
 7 -1 -2 5.08 0.4 
 -7 -1 2 3.73 0.63 
 -7 -1 2 4.66 0.72 
 -7 1 2 3.89 0.69 
 -7 1 2 4.29 0.72 
 -7 1 2 3.74 0.59 
 -6 -1 2 2.81 0.61 
 -6 -1 2 2.47 0.52 
 6 -1 -2 2.37 0.3 
 -6 1 2 2.68 0.51 
 -6 1 2 2.68 0.63 
 6 1 -2 2.58 0.47 
 -6 1 2 2.88 0.59 
 5 -1 -2 0.23 0.38 
 5 -1 -2 0.35 0.22 
 -5 -1 2 0.81 0.41 
 -5 -1 2 0.3 0.45 
 -5 1 2 0.4 0.38 
 -5 1 2 0.83 0.47 
 5 1 -2 0.39 0.35 
 -5 1 2 1.01 0.46 
 4 -1 -2 0.05 0.39 
 4 -1 -2 -0.05 0.2 
 4 -1 -2 -0.05 0.39 
 -4 -1 2 0.22 0.36 
 4 -1 -2 0.43 0.39 
 -4 -1 2 0.41 0.35 
 -4 -1 2 -0.26 0.43 
 4 1 -2 0.18 0.34 
 -4 1 2 0.15 0.35 
 -4 1 2 -0.15 0.39 
 4 1 -2 -0.16 0.32 
 4 1 -2 0.02 0.46 
 -4 1 2 -0.01 0.43 
 -3 -1 2 7.53 0.59 
 -3 -1 2 8.52 0.67 
 3 -1 -2 8.81 0.67 
 -3 -1 2 9.56 0.72 
 3 -1 -2 7.77 0.64 
 3 1 -2 8.35 0.59 
 -3 1 2 7.77 0.62 
 -3 1 2 8.47 0.67 
 3 1 -2 9.08 0.73 
 -3 1 2 8.98 0.67 
 -2 -1 2 8.43 0.57 
 -2 -1 2 8.81 0.49 
 2 -1 -2 8.48 0.56 
 2 -1 -2 8.85 0.59 
 -2 -1 2 8.02 0.34 
 -2 -1 2 7.46 0.58 
 -2 1 2 8.42 0.55 
 2 1 -2 8.69 0.53 
 2 1 -2 11.11 0.59 
 2 1 -2 8.54 0.35 
 -2 1 2 8.94 0.56 
 -2 1 2 8.88 0.52 
 1 -1 -2 173.24 4.83 
 1 -1 -2 176.84 4.79 
 1 -1 -2 175.12 4.8 
 1 -1 -2 173.62 4.82 
 -1 -1 2 146.12 4.81 
 -1 -1 2 175.19 4.8 
 -1 1 2 178.05 4.83 
 1 1 -2 173.82 4.77 
 1 1 -2 180.47 4.78 
 -1 1 2 174.13 4.79 
 1 1 -2 174.43 4.83 
 -1 1 2 160.84 4.82 
 1 1 -2 170.25 4.8 
 0 -1 -2 46.72 1.43 
 0 -1 -2 42.13 1.39 
 0 -1 -2 46.65 1.44 
 0 -1 -2 46.66 1.41 
 0 1 -2 47.02 1.33 
 0 1 -2 48.26 1.44 
 0 1 -2 47.64 1.39 
 0 1 2 45.84 1.42 
 0 1 2 44.95 1.39 
 0 1 -2 46.04 1.43 
 1 -1 2 0.65 0.28 
 1 -1 2 0.36 0.21 
 -1 -1 -2 0.14 0.13 
 1 -1 2 0.77 0.26 
 -1 -1 -2 0.22 0.15 
 -1 -1 -2 0.28 0.21 
 -1 -1 -2 0.24 0.23 
 -1 -1 -2 0.37 0.28 
 -1 1 -2 0.05 0.19 
 -1 1 -2 0.29 0.28 
 1 1 2 0.54 0.22 
 1 1 2 0.4 0.23 
 1 1 2 0.64 0.2 
 -1 1 -2 0.15 0.1 
 -1 1 -2 -0.14 0.15 
 1 1 2 0.36 0.23 
 1 1 2 0.46 0.17 
 2 -1 2 4.74 0.47 
 -2 -1 -2 4.81 0.46 
 -2 -1 -2 4.37 0.39 
 2 -1 2 4.73 0.49 
 2 -1 2 4.52 0.45 
 -2 -1 -2 4.17 0.38 
 -2 -1 -2 4.1 0.4 
 2 1 2 5.04 0.46 
 2 1 2 4.77 0.41 
 -2 1 -2 4.18 0.43 
 -2 1 -2 3.83 0.42 
 -2 1 -2 4.87 0.47 
 2 1 2 3.76 0.27 
 2 1 2 4.42 0.46 
 3 -1 2 11.88 0.78 
 -3 -1 -2 10.63 0.74 
 -3 -1 -2 11.47 0.68 
 3 -1 2 10.52 0.72 
 3 -1 2 11.65 0.75 
 -3 -1 -2 12.17 0.67 
 3 1 2 13.01 0.73 
 3 1 2 11.4 0.75 
 -3 1 -2 11.78 0.73 
 -3 1 -2 11.66 0.78 
 3 1 2 11.48 0.72 
 -3 1 -2 12.07 0.72 
 4 -1 2 43.51 1.65 
 4 -1 2 46.97 1.78 
 4 -1 2 44.78 1.58 
 -4 -1 -2 44.58 1.55 
 -4 -1 -2 41.4 1.58 
 -4 -1 -2 41.17 1.62 
 -4 1 -2 43.06 1.56 
 4 1 2 43.29 1.59 
 -4 1 -2 43.97 1.65 
 4 1 2 42.3 1.32 
 4 1 2 43.2 1.57 
 4 1 2 45.79 1.63 
 -4 1 -2 44.12 1.65 
 -5 -1 -2 38.48 1.47 
 5 -1 2 40.95 1.4 
 -5 -1 -2 40.87 1.6 
 5 -1 2 41.49 1.61 
 -5 -1 -2 40.65 1.61 
 5 -1 2 38.89 1.52 
 -5 1 -2 40.19 1.5 
 -5 1 -2 37.77 1.59 
 5 1 2 39.28 1.5 
 -5 1 -2 37.88 1.62 
 -6 -1 -2 83.27 2.89 
 6 -1 2 87.17 2.69 
 6 -1 2 81.67 2.78 
 -6 -1 -2 87.45 2.76 
 -6 -1 -2 89.42 2.94 
 6 1 2 83.94 2.77 
 -6 1 -2 89.49 2.97 
 -6 1 -2 88.53 2.78 
 -6 1 -2 82.42 2.92 
 -7 -1 -2 2.48 0.59 
 7 -1 2 3.77 0.48 
 -7 -1 -2 2.97 0.65 
 -7 -1 -2 4.54 0.65 
 7 -1 2 3.63 0.55 
 -7 1 -2 1.99 0.6 
 -7 1 -2 3.29 0.61 
 7 1 2 3.61 0.53 
 -8 -1 -2 0.76 0.56 
 8 -1 2 0.38 0.43 
 -8 -1 -2 0.13 0.6 
 -8 1 -2 0.96 0.64 
 -8 1 -2 -0.35 0.48 
 8 1 2 -0.03 0.39 
 9 -1 2 -0.09 0.4 
 -9 -1 -2 -0.32 0.61 
 -9 -1 -2 -0.05 0.57 
 -9 1 -2 1.23 0.72 
 -9 1 -2 1.61 0.67 
 9 1 2 -0.07 0.42 
 -10 -1 -2 0.88 0.7 
 10 -1 2 2.29 0.58 
 -10 -1 -2 1.55 0.75 
 10 1 2 1.63 0.54 
 -10 1 -2 2.79 0.82 
 -10 1 -2 2.94 0.84 
 11 -1 2 2.9 0.8 
 -11 -1 -2 3.75 1.06 
 -11 -1 -2 2.46 0.9 
 -11 1 -2 1.3 0.77 
 -11 1 -2 3.33 0.96 
 -12 -1 -2 7.71 1.35 
 -12 -1 -2 7.29 1.23 
 -12 1 -2 8.48 1.32 
 -12 1 -2 7.79 1.29 
 -13 -1 -2 -0.62 0.91 
 -13 -1 -2 -2.15 0.89 
 -13 1 -2 -1.2 1.02 
 -13 1 -2 2.56 1.04 
 -14 -1 -2 5.06 1.28 
 -14 -1 -2 3.9 1.39 
 -14 1 -2 2.58 1.2 
 -14 1 -2 3.91 1.23 
 -14 -2 2 1.92 1.07 
 -14 -2 2 0.07 1.16 
 -14 2 2 -0.81 0.91 
 -14 2 2 1.04 1.04 
 -13 -2 2 1.76 1.11 
 -13 -2 2 -0.68 0.87 
 -13 2 2 0.74 0.87 
 -13 2 2 -0.53 0.87 
 -12 -2 2 1.44 1 
 -12 -2 2 1.07 0.87 
 -12 2 2 0.94 0.96 
 -12 2 2 0.58 0.86 
 -11 -2 2 1.89 0.83 
 -11 -2 2 2.25 0.57 
 -11 -2 2 0.8 0.95 
 -11 2 2 2.71 0.93 
 -11 2 2 2.02 0.96 
 -11 2 2 1.48 0.65 
 -10 -2 2 0.91 0.7 
 -10 -2 2 2.58 0.83 
 -10 -2 2 2.52 0.55 
 -10 2 2 2.94 0.82 
 -10 2 2 2.84 0.68 
 -10 2 2 2.79 0.92 
 -9 -2 2 1.79 0.49 
 -9 -2 2 1.43 0.6 
 -9 -2 2 1.43 0.68 
 9 -2 -2 1.29 0.33 
 -9 2 2 2.64 0.78 
 -9 2 2 1.04 0.53 
 -9 2 2 1.19 0.68 
 -8 -2 2 65.89 2.62 
 8 -2 -2 66.78 2.13 
 -8 -2 2 67.34 2.51 
 -8 -2 2 64.83 2.26 
 -8 2 2 67.72 2.43 
 -8 2 2 68.62 2.62 
 -8 2 2 66.03 2.57 
 7 -2 -2 14.35 0.74 
 -7 -2 2 14.9 1.05 
 -7 -2 2 14.01 1.08 
 -7 2 2 15.17 1.21 
 7 2 -2 17.18 0.89 
 -7 2 2 13.76 0.95 
 -7 2 2 14.47 1.09 
 6 -2 -2 0.63 0.28 
 -6 -2 2 0.12 0.4 
 -6 -2 2 0.77 0.56 
 6 2 -2 1.11 0.37 
 -6 2 2 0.88 0.53 
 -6 2 2 0.56 0.46 
 -6 2 2 0.38 0.44 
 5 -2 -2 11.21 0.86 
 -5 -2 2 9.28 0.81 
 -5 -2 2 11.09 0.78 
 5 -2 -2 10.54 0.59 
 5 -2 -2 11.75 0.83 
 -5 2 2 10.65 0.8 
 5 2 -2 10.93 0.69 
 -5 2 2 10.44 0.82 
 -5 2 2 10.42 0.83 
 -4 -2 2 0.98 0.36 
 4 -2 -2 0.35 0.43 
 -4 -2 2 -0.01 0.41 
 4 -2 -2 0.71 0.27 
 -4 -2 2 0.38 0.29 
 4 -2 -2 0.58 0.37 
 4 -2 -2 0.25 0.42 
 -4 -2 2 0.19 0.11 
 -4 2 2 0.42 0.4 
 -4 2 2 0.09 0.41 
 -4 2 2 0.57 0.4 
 4 2 -2 0.01 0.31 
 -4 2 2 0.92 0.44 
 4 2 -2 0.73 0.34 
 4 2 -2 0.58 0.42 
 3 -2 -2 86.16 2.63 
 3 -2 -2 83.58 2.61 
 -3 -2 2 85.38 2.53 
 -3 -2 2 83.07 2.52 
 -3 -2 2 82.27 2.36 
 -3 -2 2 81.93 2.63 
 -3 2 2 85.2 2.63 
 3 2 -2 82.71 2.63 
 -3 2 2 87.9 2.63 
 3 2 -2 84.76 2.53 
 -3 2 2 80.53 2.63 
 -3 2 2 82.75 2.6 
 -2 -2 2 84.02 2.4 
 2 -2 -2 82.19 2.53 
 -2 -2 2 84.44 2.5 
 -2 -2 2 82.78 2.55 
 2 -2 -2 85.43 2.51 
 -2 2 2 87.16 2.58 
 -2 2 2 81.99 2.5 
 -2 2 2 83.83 2.55 
 2 2 -2 84.29 2.5 
 2 2 -2 82.19 2.55 
 -2 2 2 84.48 2.58 
 1 -2 -2 7.97 0.4 
 1 -2 -2 7.91 0.51 
 1 -2 -2 7.66 0.51 
 -1 -2 2 7.88 0.47 
 1 2 -2 7.86 0.46 
 1 2 -2 8.29 0.37 
 -1 2 2 7.96 0.41 
 1 2 -2 8.96 0.52 
 -1 2 2 8.2 0.53 
 0 -2 2 485.59 13.13 
 0 -2 -2 441.59 13.1 
 0 -2 -2 491.6 13.12 
 0 -2 -2 471.32 13.14 
 0 2 -2 480.68 13.13 
 0 2 2 486.47 13.12 
 0 2 -2 476.06 13.04 
 0 2 2 485.28 13.11 
 -1 -2 -2 52.57 1.67 
 1 -2 2 50.23 1.59 
 1 -2 2 52.89 1.65 
 -1 -2 -2 48.95 1.61 
 -1 -2 -2 52.63 1.49 
 -1 -2 -2 50.25 1.6 
 1 -2 2 52.42 1.67 
 1 2 2 51.2 1.67 
 1 2 2 51.64 1.6 
 1 2 2 49.97 1.49 
 -1 2 -2 52.69 1.66 
 1 2 2 50.41 1.62 
 -2 -2 -2 31.75 1.06 
 -2 -2 -2 30.16 1.15 
 -2 -2 -2 31.84 0.92 
 2 -2 2 30.82 1.15 
 2 -2 2 33.09 1.18 
 2 -2 2 30.36 1.2 
 -2 -2 -2 31.78 1.18 
 -2 -2 -2 31.02 1.14 
 -2 2 -2 30.9 1.2 
 -2 2 -2 31.18 0.98 
 2 2 2 32.02 1.08 
 -2 2 -2 33.06 1.17 
 -2 2 -2 30.94 1.2 
 2 2 2 30.09 1.18 
 2 2 2 30.93 1.14 
 3 -2 2 4.59 0.57 
 -3 -2 -2 4.25 0.44 
 3 -2 2 4.47 0.53 
 3 -2 2 4.25 0.52 
 -3 -2 -2 5.86 0.55 
 -3 -2 -2 4.74 0.5 
 -3 2 -2 4.65 0.39 
 -3 2 -2 4.97 0.56 
 -3 2 -2 3.86 0.5 
 3 2 2 4.52 0.48 
 3 2 2 4.06 0.49 
 3 2 2 4.82 0.52 
 -3 2 -2 4.07 0.51 
 -4 -2 -2 12.31 0.79 
 4 -2 2 11.09 0.83 
 -4 -2 -2 11.5 0.79 
 -4 -2 -2 11.14 0.71 
 4 -2 2 11.63 0.81 
 4 2 2 11.36 0.77 
 -4 2 -2 12.69 0.78 
 -4 2 -2 10.3 0.65 
 4 2 2 11.06 0.8 
 -4 2 -2 11.21 0.85 
 -4 2 -2 11.72 0.9 
 4 2 2 11.84 0.77 
 -5 -2 -2 62.85 2.21 
 5 -2 2 60.3 2.07 
 -5 -2 -2 59.04 2.18 
 -5 -2 -2 64.91 2.12 
 5 -2 2 62.57 2.27 
 5 -2 2 62.57 2.16 
 -5 2 -2 63.66 2.28 
 -5 2 -2 64.72 2.09 
 -5 2 -2 61.46 2.25 
 -5 2 -2 66.1 2.17 
 5 2 2 63.21 2.14 
 6 -2 2 20.29 1.07 
 6 -2 2 20.18 1.18 
 -6 -2 -2 17.7 1.06 
 6 -2 2 18.21 0.93 
 -6 -2 -2 18.18 1.09 
 -6 -2 -2 18.78 0.96 
 -6 2 -2 20.08 1.24 
 6 2 2 18.12 0.99 
 -6 2 -2 17.66 1.14 
 7 -2 2 0.3 0.41 
 -7 -2 -2 1.05 0.5 
 -7 -2 -2 0 0.46 
 7 2 2 0.18 0.38 
 -7 2 -2 -0.07 0.43 
 -7 2 -2 -0.37 0.47 
 8 -2 2 4.36 0.63 
 -8 -2 -2 2.5 0.65 
 -8 -2 -2 3.65 0.7 
 8 2 2 3.77 0.57 
 -8 2 -2 2.74 0.78 
 8 2 2 3.58 0.38 
 -8 2 -2 4 0.78 
 9 -2 2 5.16 0.7 
 -9 -2 -2 5.3 0.9 
 -9 -2 -2 5.81 0.94 
 -9 2 -2 4.74 0.89 
 9 2 2 6.03 0.69 
 -9 2 -2 6.13 0.92 
 10 -2 2 14.01 1.08 
 -10 -2 -2 17.63 1.46 
 -10 -2 -2 14.35 1.42 
 10 2 2 13.96 1.01 
 -10 2 -2 17.56 1.51 
 -10 2 -2 15.27 1.44 
 -11 -2 -2 8.05 1.17 
 11 -2 2 6.03 0.8 
 -11 -2 -2 6.61 1.18 
 -11 2 -2 5.74 1.03 
 -11 2 -2 5.91 1.21 
 -12 -2 -2 11.68 1.46 
 -12 -2 -2 10.83 1.48 
 -12 2 -2 12.11 1.51 
 -12 2 -2 15.1 1.67 
 -13 -2 -2 1.23 0.95 
 -13 -2 -2 1.47 1.11 
 -13 2 -2 0.7 0.91 
 -13 2 -2 2.96 1.23 
 -14 -2 -2 2.74 1.16 
 -14 -2 -2 2.58 1.16 
 -14 2 -2 3.41 1.19 
 -14 -3 2 -0.23 0.98 
 -14 -3 2 -1.16 0.91 
 -14 3 2 -1.3 1.01 
 -13 -3 2 5.17 1.29 
 -13 -3 2 6.48 1.19 
 -13 3 2 5.04 1.21 
 -13 3 2 5.73 1.24 
 -12 -3 2 4.62 1.05 
 -12 -3 2 4.22 1.17 
 -12 3 2 2.74 1.11 
 -12 3 2 4.19 1.09 
 -11 -3 2 9.74 0.86 
 -11 -3 2 9.05 1.23 
 -11 -3 2 7.69 1.09 
 -11 3 2 7.22 1.12 
 -11 3 2 6.72 1.14 
 10 -3 -2 7.54 0.73 
 -10 -3 2 5.54 1 
 -10 -3 2 9.24 0.79 
 -10 -3 2 8.54 1.03 
 -10 3 2 8.21 1.13 
 -10 3 2 8.43 1.19 
 -10 3 2 7.27 0.94 
 -9 -3 2 1.19 0.6 
 9 -3 -2 0.87 0.36 
 -9 -3 2 0.35 0.4 
 -9 -3 2 0.42 0.7 
 -9 3 2 1.04 0.57 
 -9 3 2 0.32 0.6 
 -9 3 2 -0.07 0.65 
 -8 -3 2 6.78 0.81 
 8 -3 -2 5.34 0.55 
 -8 -3 2 5.55 0.89 
 -8 3 2 4.93 0.82 
 -8 3 2 6.64 0.78 
 -8 3 2 4.57 0.79 
 -7 -3 2 9.16 0.42 
 -7 -3 2 9.53 0.84 
 -7 -3 2 8.74 0.95 
 7 -3 -2 8.69 0.64 
 7 3 -2 8.69 0.67 
 -7 3 2 10.61 0.94 
 -7 3 2 9.22 0.91 
 -7 3 2 9.01 0.9 
 6 -3 -2 0.16 0.5 
 -6 -3 2 0.06 0.46 
 -6 -3 2 0.33 0.18 
 6 -3 -2 0.53 0.46 
 6 -3 -2 0.54 0.32 
 -6 -3 2 0.08 0.4 
 -6 3 2 0.83 0.47 
 -6 3 2 0.67 0.47 
 -6 3 2 0.1 0.48 
 6 3 -2 0.43 0.34 
 -5 -3 2 5.49 0.33 
 5 -3 -2 6.97 0.73 
 5 -3 -2 5.84 0.67 
 -5 -3 2 5.61 0.56 
 -5 -3 2 5.35 0.67 
 5 -3 -2 6.31 0.52 
 -5 3 2 6.11 0.68 
 -5 3 2 5.72 0.64 
 5 3 -2 5.13 0.66 
 -5 3 2 7.16 0.74 
 5 3 -2 6.97 0.56 
 4 -3 -2 9.54 0.62 
 -4 -3 2 10.82 0.66 
 4 -3 -2 10.29 0.8 
 -4 -3 2 11.24 0.84 
 4 -3 -2 9.74 0.76 
 4 -3 -2 11.1 0.85 
 -4 -3 2 9.76 0.61 
 -4 3 2 11.03 0.82 
 -4 3 2 9.71 0.77 
 -4 3 2 10.59 0.76 
 4 3 -2 10.72 0.64 
 -4 3 2 10.72 0.85 
 3 -3 -2 134.71 4.05 
 -3 -3 2 139.02 3.98 
 3 -3 -2 139.77 4.04 
 -3 -3 2 137.72 4.09 
 -3 -3 2 135.72 3.91 
 -3 3 2 139.63 4.11 
 3 3 -2 135.52 4.08 
 -3 3 2 135.18 4.04 
 -3 3 2 137.66 4.07 
 3 3 -2 137.47 3.98 
 -3 3 2 135.43 4.1 
 -2 -3 2 78.57 2.34 
 -2 -3 2 78.42 2.29 
 2 -3 -2 77.42 2.32 
 2 -3 -2 75.84 2.38 
 -2 -3 2 75.85 2.38 
 -2 3 2 76.19 2.38 
 -2 3 2 76.04 2.41 
 -2 3 2 76.86 2.43 
 -2 3 2 75.6 2.32 
 -2 3 2 72.86 2.41 
 2 3 -2 80.77 2.4 
 2 3 -2 77.85 2.34 
 -1 -3 2 386.9 10.69 
 -1 -3 2 392.5 10.54 
 1 -3 -2 368.16 10.7 
 1 -3 -2 392.35 10.71 
 1 -3 -2 389.44 10.59 
 -1 -3 2 377.99 10.7 
 1 3 -2 396.19 10.52 
 -1 3 2 391.73 10.73 
 -1 3 2 383.24 10.71 
 -1 3 2 381.33 10.59 
 1 3 -2 390.74 10.69 
 0 -3 -2 2.83 0.39 
 0 -3 -2 3.3 0.4 
 0 -3 2 2.57 0.33 
 0 -3 -2 3.72 0.37 
 0 -3 2 3.1 0.26 
 0 3 2 4.29 0.38 
 0 3 -2 3.3 0.41 
 0 3 2 3.18 0.4 
 0 3 -2 3.37 0.26 
 0 3 2 2.95 0.34 
 1 -3 2 4.88 0.41 
 -1 -3 -2 3.88 0.37 
 -1 -3 -2 4.7 0.25 
 -1 -3 -2 5.13 0.48 
 1 -3 2 4.33 0.44 
 1 -3 2 5.46 0.51 
 1 -3 2 4.08 0.24 
 -1 -3 -2 5 0.51 
 1 3 2 4.83 0.47 
 -1 3 -2 4.51 0.46 
 1 3 2 4.94 0.5 
 -1 3 -2 4.37 0.26 
 1 3 2 4.8 0.28 
 1 3 2 4.34 0.38 
 -1 3 -2 5.27 0.4 
 1 3 2 4.48 0.34 
 -2 -3 -2 2.46 0.28 
 -2 -3 -2 2.81 0.45 
 2 -3 2 2.82 0.25 
 2 -3 2 2.44 0.47 
 -2 -3 -2 2.69 0.38 
 -2 -3 -2 2.92 0.48 
 2 -3 2 2.41 0.4 
 2 -3 2 2.72 0.44 
 2 3 2 2.92 0.32 
 2 3 2 2.56 0.23 
 2 3 2 3.44 0.49 
 -2 3 -2 2.29 0.44 
 2 3 2 2.17 0.39 
 -2 3 -2 2.98 0.26 
 2 3 2 2.73 0.37 
 -2 3 -2 2.63 0.45 
 -3 -3 -2 13.15 0.77 
 3 -3 2 14.59 0.89 
 3 -3 2 14.46 0.84 
 -3 -3 -2 12.81 0.83 
 3 -3 2 14.01 0.86 
 -3 -3 -2 13.42 0.77 
 -3 -3 -2 14.86 0.71 
 3 3 2 14.66 0.77 
 -3 3 -2 12.39 0.88 
 -3 3 -2 13.05 0.61 
 3 3 2 13.6 0.81 
 -3 3 -2 12.9 0.83 
 3 3 2 13.31 0.71 
 -3 3 -2 14.45 0.84 
 -4 -3 -2 60.67 2.02 
 4 -3 2 57.87 2.08 
 -4 -3 -2 57.97 2.02 
 -4 -3 -2 62.06 2 
 4 -3 2 60.15 2.08 
 -4 3 -2 59.05 1.9 
 -4 3 -2 56.21 2.08 
 -4 3 -2 55.94 2.05 
 4 3 2 61.92 2.02 
 4 3 2 61.05 2.02 
 -4 3 -2 61.67 2.06 
 -5 -3 -2 6.01 0.63 
 -5 -3 -2 3.66 0.58 
 5 -3 2 6.05 0.67 
 5 -3 2 4.83 0.64 
 5 -3 2 5.51 0.57 
 -5 -3 -2 4.62 0.56 
 5 3 2 4.98 0.57 
 -5 3 -2 3.54 0.61 
 -5 3 -2 4.25 0.65 
 -5 3 -2 4.54 0.66 
 -5 3 -2 5.15 0.52 
 6 -3 2 10.19 0.89 
 -6 -3 -2 11.5 0.76 
 -6 -3 -2 10.33 0.82 
 -6 -3 -2 9.4 0.82 
 6 -3 2 8.99 0.81 
 -6 3 -2 9.67 0.91 
 6 3 2 9.66 0.77 
 -6 3 -2 10.77 0.96 
 7 -3 2 21.93 1.18 
 -7 -3 -2 20.99 1.23 
 -7 -3 -2 20.08 1.24 
 -7 3 -2 19.94 1.27 
 -7 3 -2 18.96 1.25 
 7 3 2 20.62 1.09 
 -8 -3 -2 4.27 0.79 
 -8 -3 -2 4.03 0.74 
 8 -3 2 2.39 0.56 
 -8 3 -2 2.86 0.7 
 -8 3 -2 2.36 0.71 
 8 3 2 1.95 0.52 
 8 3 2 3.54 0.28 
 9 -3 2 4.37 0.68 
 -9 -3 -2 2.65 0.74 
 -9 -3 -2 4.25 0.81 
 -9 3 -2 4.1 0.92 
 -9 3 -2 2.75 0.75 
 9 3 2 4.47 0.65 
 10 -3 2 5.99 0.81 
 -10 -3 -2 5.72 0.95 
 -10 -3 -2 6.1 1.01 
 10 3 2 5.33 0.7 
 -10 3 -2 6.58 1.05 
 -10 3 -2 5.04 1.05 
 -11 -3 -2 0.42 0.85 
 11 -3 2 0.42 0.54 
 -11 -3 -2 0.4 0.73 
 -11 3 -2 -0.87 0.7 
 -11 3 -2 -0.21 0.89 
 -12 -3 -2 2.91 1.03 
 -12 -3 -2 5.14 1.09 
 -12 3 -2 2.74 0.94 
 -12 3 -2 0.21 0.87 
 -13 -3 -2 -0.27 0.98 
 -13 -3 -2 1.68 0.94 
 -13 3 -2 0.33 0.95 
 -14 -3 -2 0.62 1.12 
 -14 -3 -2 0.69 0.97 
 -14 3 -2 -0.71 0.95 
 -14 -4 2 -1.32 1.15 
 -14 -4 2 0.16 0.92 
 -14 4 2 0.64 1 
 -13 -4 2 0.22 0.91 
 -13 -4 2 1.1 0.98 
 -13 4 2 1.04 0.92 
 -13 4 2 0.65 1.05 
 -12 -4 2 7.36 1.37 
 -12 -4 2 9.04 1.23 
 -12 4 2 7.53 1.29 
 -12 4 2 7.24 1.35 
 -11 -4 2 0.97 0.76 
 -11 -4 2 2.22 0.96 
 -11 4 2 1.26 0.82 
 -11 4 2 0.66 0.89 
 -10 -4 2 0.51 0.43 
 10 -4 -2 0.87 0.39 
 -10 -4 2 1.55 0.67 
 -10 -4 2 1.12 0.82 
 -10 4 2 1.04 0.74 
 -10 4 2 0.04 0.67 
 -9 -4 2 1.31 0.62 
 9 -4 -2 1.06 0.44 
 -9 -4 2 1.58 0.77 
 -9 4 2 0.66 0.58 
 -9 4 2 -0.01 0.57 
 -9 4 2 0.46 0.64 
 8 -4 -2 6.89 0.65 
 -8 -4 2 5.36 0.85 
 -8 -4 2 7.8 0.85 
 -8 4 2 4.73 0.79 
 8 4 -2 6.89 0.64 
 -8 4 2 7.19 0.98 
 -8 4 2 6.26 0.82 
 7 -4 -2 58.44 2.25 
 -7 -4 2 54.7 1.77 
 7 -4 -2 59.82 2.03 
 -7 -4 2 56.71 2.32 
 -7 -4 2 58.97 2.14 
 -7 4 2 58.68 2.24 
 -7 4 2 60.34 2.35 
 7 4 -2 60.16 1.99 
 -7 4 2 59.41 2.35 
 6 -4 -2 4.81 0.69 
 6 -4 -2 6.16 0.59 
 -6 -4 2 4.62 0.37 
 -6 -4 2 5.38 0.75 
 -6 -4 2 5.37 0.6 
 6 -4 -2 4.73 0.68 
 -6 4 2 5.29 0.73 
 -6 4 2 6.68 0.8 
 6 4 -2 5.56 0.54 
 -6 4 2 6.19 0.74 
 -5 -4 2 19.44 0.93 
 5 -4 -2 19.41 1.14 
 -5 -4 2 19.63 1.13 
 5 -4 -2 20.2 1.1 
 -5 -4 2 20.09 0.88 
 -5 -4 2 19.92 0.77 
 5 -4 -2 20.17 0.95 
 -5 4 2 19.81 1.12 
 -5 4 2 19.23 1.07 
 5 4 -2 19.85 1.12 
 -5 4 2 18.06 1.12 
 5 4 -2 19.91 0.89 
 -4 -4 2 1.83 0.36 
 -4 -4 2 1.78 0.45 
 4 -4 -2 2.29 0.49 
 4 -4 -2 2.05 0.52 
 4 -4 -2 1.46 0.48 
 -4 -4 2 1.93 0.34 
 4 4 -2 2.19 0.54 
 -4 4 2 0.86 0.43 
 4 4 -2 1.56 0.38 
 -4 4 2 1.45 0.49 
 -4 4 2 1.21 0.42 
 -3 -4 2 5.34 0.49 
 3 -4 -2 5.26 0.53 
 3 -4 -2 4.33 0.54 
 -3 -4 2 6.57 0.61 
 -3 -4 2 5.01 0.38 
 3 -4 -2 5.23 0.57 
 3 4 -2 5.7 0.52 
 3 4 -2 6 0.62 
 -3 4 2 5.34 0.57 
 -3 4 2 6.29 0.66 
 -3 4 2 4.77 0.54 
 -3 4 2 5.79 0.65 
 -3 4 2 5.33 0.55 
 -2 -4 2 389.47 10.79 
 -2 -4 2 397.14 10.81 
 2 -4 -2 391.08 10.76 
 -2 -4 2 387.17 10.85 
 2 -4 -2 380.85 10.84 
 2 -4 -2 378.17 10.87 
 -2 4 2 387.9 10.86 
 -2 4 2 373.27 10.84 
 -2 4 2 391.58 10.9 
 -2 4 2 409.28 10.89 
 -2 4 2 390.65 10.76 
 -1 -4 2 807.65 22.19 
 1 -4 -2 832.83 22.19 
 1 -4 -2 813.02 22.21 
 1 -4 -2 784.36 22.17 
 1 -4 -2 793.31 22.03 
 -1 -4 2 810.14 21.99 
 -1 -4 2 821.07 22.19 
 -1 4 2 797.49 22.04 
 -1 4 2 824.63 22.22 
 -1 4 2 802.85 22.19 
 -1 4 2 808.15 22.17 
 0 -4 2 26.92 0.89 
 0 -4 -2 26.67 1.05 
 0 -4 2 25.82 0.9 
 0 -4 -2 26.73 1.02 
 0 -4 -2 25.81 0.99 
 0 -4 2 26.72 1.09 
 0 4 -2 26.63 0.86 
 0 4 -2 27.41 1.07 
 0 4 2 27.49 1.05 
 0 4 2 26.31 1 
 0 4 2 27.22 1.04 
 1 -4 2 41.74 1.25 
 -1 -4 -2 40.79 1.48 
 1 -4 2 40.4 1.5 
 1 -4 2 42.45 1.38 
 -1 -4 -2 42.93 1.54 
 -1 -4 -2 43 1.21 
 -1 -4 -2 39.73 1.39 
 1 -4 2 40.96 1.44 
 -1 -4 -2 42.59 1.34 
 -1 4 -2 41.46 1.37 
 -1 4 -2 42.84 1.51 
 1 4 2 42.28 1.39 
 -1 4 -2 41.6 1.26 
 1 4 2 41.57 1.36 
 1 4 2 41.58 1.22 
 1 4 2 41.12 1.49 
 2 -4 2 0.26 0.43 
 2 -4 2 0.03 0.43 
 -2 -4 -2 -0.11 0.17 
 -2 -4 -2 0.79 0.36 
 -2 -4 -2 0.36 0.2 
 2 -4 2 0.54 0.34 
 2 -4 2 1.11 0.21 
 -2 -4 -2 0.96 0.42 
 -2 -4 -2 0.46 0.3 
 -2 4 -2 0.31 0.36 
 -2 4 -2 0.37 0.3 
 2 4 2 0.48 0.39 
 2 4 2 0.3 0.24 
 -2 4 -2 0.54 0.44 
 2 4 2 0.27 0.3 
 -2 4 -2 0.61 0.22 
 3 -4 2 0.9 0.44 
 3 -4 2 1.11 0.28 
 -3 -4 -2 1.34 0.3 
 -3 -4 -2 1.42 0.45 
 -3 -4 -2 1.54 0.38 
 -3 -4 -2 1.31 0.41 
 3 -4 2 1.27 0.44 
 3 -4 2 1.07 0.43 
 -3 4 -2 1.57 0.37 
 3 4 2 1.18 0.36 
 -3 4 -2 1.61 0.29 
 -3 4 -2 1.04 0.4 
 3 4 2 1.53 0.35 
 -3 4 -2 0.91 0.43 
 3 4 2 0.74 0.43 
 -4 -4 -2 0.57 0.42 
 -4 -4 -2 0.6 0.39 
 -4 -4 -2 0.95 0.4 
 -4 -4 -2 1.58 0.37 
 4 -4 2 0.75 0.43 
 4 -4 2 1.55 0.48 
 -4 4 -2 1.4 0.46 
 -4 4 -2 0.92 0.31 
 4 4 2 1.06 0.4 
 -4 4 -2 0.75 0.46 
 4 4 2 0.81 0.43 
 -5 -4 -2 12.07 0.85 
 5 -4 2 12.33 0.91 
 5 -4 2 12.66 0.99 
 -5 -4 -2 12.96 0.84 
 -5 -4 -2 13.01 0.82 
 -5 4 -2 12.72 1.01 
 5 4 2 12.48 0.83 
 -5 4 -2 10.59 0.89 
 -5 4 -2 13.05 0.75 
 6 -4 2 0.84 0.51 
 -6 -4 -2 1.12 0.46 
 -6 -4 -2 1.45 0.5 
 6 -4 2 1.6 0.52 
 6 4 2 0.56 0.4 
 -6 4 -2 0.33 0.49 
 -6 4 -2 0.12 0.55 
 7 -4 2 1.66 1.11 
 -7 -4 -2 1.5 0.5 
 -7 -4 -2 2.15 0.57 
 7 -4 2 2.74 0.59 
 -7 4 -2 2.02 0.68 
 7 4 2 2.46 0.53 
 -7 4 -2 2.38 0.61 
 -8 -4 -2 3.66 0.7 
 8 -4 2 3.97 0.68 
 -8 -4 -2 4.06 0.77 
 -8 4 -2 3.55 0.76 
 -8 4 -2 3.3 0.76 
 8 4 2 3.98 0.62 
 9 -4 2 9.31 0.96 
 -9 -4 -2 8.52 1.07 
 -9 -4 -2 10.51 1.11 
 -9 4 -2 10.3 1.23 
 -9 4 -2 7.08 1.02 
 9 4 2 10.38 0.88 
 -10 -4 -2 1.85 0.79 
 10 -4 2 2.82 0.66 
 -10 -4 -2 2.05 0.75 
 10 4 2 0.07 0.48 
 -10 4 -2 1.82 0.86 
 -10 4 -2 1.72 0.8 
 -11 -4 -2 37.32 2.16 
 -11 -4 -2 34.86 2.07 
 11 -4 2 38.3 1.82 
 -11 4 -2 36.5 2.12 
 -11 4 -2 34.76 2.22 
 -12 -4 -2 3.94 1.09 
 -12 -4 -2 4.78 1.14 
 -12 4 -2 1.94 1.08 
 -13 -4 -2 1.42 1 
 -13 -4 -2 1.92 1.02 
 -13 4 -2 1.84 1.17 
 -14 -4 -2 -0.68 0.91 
 -14 -4 -2 -0.43 1.05 
 -14 4 -2 -0.19 1.08 
 -14 -5 2 0.14 1.14 
 -14 -5 2 3.43 1.11 
 -14 5 2 0.43 1.03 
 -13 -5 2 9.71 1.32 
 -13 -5 2 11.92 1.64 
 -13 5 2 8.8 1.42 
 -12 -5 2 2.74 1.02 
 -12 -5 2 3.78 0.98 
 -12 5 2 1.67 1 
 -12 5 2 3.36 1.02 
 -11 -5 2 -0.13 0.83 
 -11 -5 2 0.63 0.67 
 -11 5 2 -0.21 0.78 
 -11 5 2 1.33 0.93 
 -10 -5 2 4.75 0.96 
 10 -5 -2 6.05 0.69 
 -10 -5 2 5.16 0.6 
 -10 -5 2 6.42 0.92 
 -10 5 2 6.19 1.05 
 -10 5 2 5.1 1 
 9 -5 -2 2.45 0.55 
 -9 -5 2 3.87 0.82 
 -9 -5 2 1.97 0.61 
 -9 5 2 5.13 0.94 
 -9 5 2 2.42 0.75 
 -8 -5 2 7.29 0.8 
 8 -5 -2 5.53 0.66 
 -8 -5 2 5.51 0.86 
 -8 -5 2 6.04 0.47 
 -8 5 2 5.67 0.86 
 -8 5 2 4.56 0.78 
 8 5 -2 7.21 0.64 
 -8 5 2 6.77 0.97 
 -7 -5 2 9.01 0.53 
 -7 -5 2 9.47 0.96 
 7 -5 -2 10.27 0.81 
 -7 -5 2 9.87 0.81 
 7 -5 -2 10.72 0.97 
 7 5 -2 10.77 0.71 
 -7 5 2 10.82 0.99 
 -7 5 2 8.85 0.94 
 -7 5 2 8.38 0.9 
 6 -5 -2 13.41 0.98 
 6 -5 -2 12.65 0.97 
 -6 -5 2 13.64 0.82 
 -6 -5 2 12.61 0.72 
 -6 -5 2 12.25 0.62 
 -6 -5 2 13 1.04 
 6 -5 -2 12.76 0.86 
 -6 5 2 11.32 0.97 
 -6 5 2 13.7 0.99 
 6 5 -2 12.23 0.98 
 6 5 -2 11.43 0.75 
 -6 5 2 13.96 1.05 
 -5 -5 2 1.81 0.37 
 -5 -5 2 1.58 0.37 
 5 -5 -2 1.17 0.5 
 -5 -5 2 2.42 0.55 
 -5 -5 2 2.49 0.33 
 5 -5 -2 1.98 0.52 
 5 -5 -2 1.9 0.44 
 -5 5 2 1.03 0.47 
 5 5 -2 1.33 0.51 
 -5 5 2 1.87 0.52 
 -5 5 2 1.72 0.53 
 5 5 -2 1.44 0.39 
 -4 -5 2 13.32 0.66 
 -4 -5 2 12.6 0.86 
 4 -5 -2 12.78 0.93 
 -4 -5 2 12.84 0.72 
 4 -5 -2 13.19 0.89 
 -4 5 2 12.56 0.86 
 4 5 -2 13.76 0.92 
 -4 5 2 14.24 0.88 
 4 5 -2 12.68 0.73 
 -4 5 2 13.29 0.96 
 3 -5 -2 85.85 2.65 
 3 -5 -2 83.47 2.69 
 -3 -5 2 84.68 2.44 
 -3 -5 2 84.81 2.62 
 -3 -5 2 85.57 2.7 
 -3 5 2 83.89 2.76 
 -3 5 2 82.39 2.73 
 -3 5 2 82.57 2.64 
 -3 5 2 85.54 2.77 
 -3 5 2 84.89 2.7 
 3 5 -2 86.6 2.71 
 2 -5 -2 0.2 0.36 
 2 -5 -2 0.55 0.38 
 -2 -5 2 0.29 0.12 
 2 -5 -2 0 0.29 
 -2 -5 2 0.98 0.36 
 -2 -5 2 0.3 0.32 
 -2 5 2 0.13 0.42 
 -2 5 2 -0.2 0.2 
 -2 5 2 0.4 0.41 
 -2 5 2 0.58 0.38 
 -2 5 2 0.21 0.31 
 -1 -5 2 437.68 12.13 
 -1 -5 2 430.3 11.84 
 1 -5 -2 420.96 12.08 
 1 -5 -2 431.7 11.93 
 1 -5 -2 422.86 12.12 
 1 -5 -2 435.12 12.11 
 -1 5 2 433.71 12.15 
 -1 5 2 452.21 12.08 
 -1 5 2 450.81 12.13 
 -1 5 2 434.71 11.94 
 0 -5 -2 13.32 0.71 
 0 -5 -2 14.28 0.47 
 0 -5 2 13.3 0.63 
 0 -5 -2 13.59 0.81 
 0 -5 2 12.67 0.56 
 0 -5 -2 13.38 0.71 
 0 -5 2 13.67 0.81 
 0 5 -2 13.72 0.54 
 0 5 2 15.87 0.8 
 0 5 2 13.09 0.76 
 0 5 2 14.24 0.7 
 1 -5 2 80.71 2.65 
 -1 -5 -2 79.34 2.3 
 1 -5 2 81.17 2.55 
 -1 -5 -2 81.31 2.59 
 -1 -5 -2 83.32 2.46 
 -1 -5 -2 80.53 2.47 
 1 -5 2 79.71 2.44 
 1 -5 2 80.15 2.36 
 1 5 2 84.33 2.46 
 -1 5 -2 80.9 2.38 
 1 5 2 84.32 2.6 
 -1 5 -2 81.32 2.44 
 -1 5 -2 79.88 2.62 
 -2 -5 -2 4.66 0.36 
 2 -5 2 4.22 0.49 
 -2 -5 -2 3.84 0.56 
 -2 -5 -2 3.91 0.53 
 2 -5 2 4.62 0.54 
 -2 -5 -2 4.24 0.44 
 2 -5 2 3.91 0.58 
 -2 -5 -2 4.52 0.33 
 2 -5 2 4.67 0.35 
 2 5 2 4.04 0.42 
 -2 5 -2 3.41 0.45 
 -2 5 -2 4.07 0.53 
 -2 5 -2 4.15 0.59 
 -2 5 -2 4.43 0.35 
 2 5 2 4.3 0.37 
 2 5 2 4.99 0.6 
 3 -5 2 11.29 0.9 
 -3 -5 -2 13.13 0.74 
 -3 -5 -2 12.33 0.61 
 3 -5 2 12.46 0.63 
 -3 -5 -2 11.13 0.79 
 3 -5 2 12.65 0.84 
 -3 -5 -2 11.69 0.82 
 -3 -5 -2 11.95 0.5 
 3 5 2 12.89 0.71 
 -3 5 -2 12.31 0.6 
 -3 5 -2 12.94 0.85 
 -4 -5 -2 3.45 0.62 
 -4 -5 -2 3.06 0.42 
 4 -5 2 2.84 0.58 
 4 -5 2 3.69 0.43 
 -4 -5 -2 2.98 0.47 
 -4 -5 -2 1.98 0.45 
 4 -5 2 1.95 0.5 
 4 5 2 3.32 0.49 
 -4 5 -2 2.82 0.38 
 -4 5 -2 2.99 0.58 
 -4 5 -2 1.95 0.47 
 5 -5 2 54.12 2.03 
 -5 -5 -2 55.11 1.92 
 -5 -5 -2 51.06 1.91 
 5 -5 2 53.05 2.05 
 -5 5 -2 52.13 2.08 
 -5 5 -2 53.11 1.8 
 -5 5 -2 52.7 2.03 
 -6 -5 -2 -0.18 0.39 
 6 -5 2 0.17 0.48 
 6 -5 2 0.41 0.48 
 -6 -5 -2 0.42 0.41 
 6 5 2 0.07 0.37 
 -6 5 -2 -0.05 0.46 
 -6 5 -2 -0.34 0.42 
 7 -5 2 9.47 0.93 
 -7 -5 -2 10.33 0.95 
 -7 -5 -2 8.54 0.84 
 7 -5 2 9.29 1.01 
 -7 5 -2 10.65 1.08 
 7 5 2 9.62 0.85 
 -7 5 -2 9.09 1.01 
 8 -5 2 5.57 0.79 
 -8 -5 -2 7.15 0.89 
 -8 -5 -2 6.48 0.81 
 -8 5 -2 4.46 0.85 
 8 5 2 5.4 0.69 
 -8 5 -2 5.89 0.98 
 9 -5 2 5.65 0.83 
 -9 -5 -2 5.3 0.82 
 -9 -5 -2 6.85 0.94 
 -9 5 -2 5.01 1.02 
 -9 5 -2 6.29 0.95 
 -10 -5 -2 0.69 0.75 
 -10 -5 -2 0.64 0.67 
 10 -5 2 1.05 0.62 
 -10 5 -2 1.1 0.79 
 -10 5 -2 0.71 0.66 
 -11 -5 -2 0.34 0.74 
 -11 -5 -2 0.75 0.84 
 11 -5 2 0.97 0.6 
 -11 5 -2 1.04 0.9 
 -11 5 -2 3.99 1.09 
 -12 -5 -2 0.3 0.84 
 -12 -5 -2 0.01 0.89 
 -12 5 -2 0.9 1.03 
 -13 -5 -2 0.35 0.99 
 -13 -5 -2 0.64 0.91 
 -13 5 -2 -2.56 0.75 
 -14 -5 -2 0.17 1.1 
 -14 -5 -2 1.45 0.98 
 -14 5 -2 -0.76 1.03 
 -14 -6 2 -0.35 1.03 
 -14 -6 2 -0.23 0.88 
 -14 6 2 0.32 1.06 
 -13 -6 2 0.11 1.03 
 -13 -6 2 1.5 0.88 
 -13 6 2 -1.46 0.98 
 -12 -6 2 -0.5 0.95 
 -12 -6 2 -0.65 0.72 
 -12 6 2 -0.61 0.79 
 -11 -6 2 2.66 0.95 
 -11 -6 2 3.67 0.89 
 -11 6 2 5.89 1.1 
 -11 6 2 3.69 1.08 
 -10 -6 2 0.96 0.64 
 10 -6 -2 0.58 0.48 
 -10 -6 2 0.48 0.71 
 -10 6 2 -0.02 0.7 
 -10 6 2 1.53 0.83 
 -9 -6 2 0.26 0.72 
 -9 -6 2 0.37 0.53 
 9 -6 -2 -0.13 0.41 
 -9 6 2 -0.39 0.59 
 -9 6 2 -0.26 0.63 
 -8 -6 2 23.8 0.99 
 -8 -6 2 27.73 1.57 
 8 -6 -2 23.71 1.24 
 -8 -6 2 23.58 1.29 
 8 -6 -2 25.12 1.49 
 8 6 -2 24.21 1.08 
 -8 6 2 25.12 1.55 
 -8 6 2 23.84 1.46 
 -7 -6 2 15.05 1.09 
 7 -6 -2 16.84 1.13 
 -7 -6 2 14.2 0.73 
 7 -6 -2 14.19 0.97 
 7 -6 -2 14.35 1.32 
 -7 -6 2 14.94 0.93 
 -7 -6 2 14.33 0.8 
 -7 6 2 14.53 1.16 
 -7 6 2 15.7 1.19 
 -7 6 2 15.39 1.24 
 7 6 -2 15.68 0.85 
 7 6 -2 12.77 1.07 
 6 -6 -2 31.31 1.55 
 -6 -6 2 29.24 1.47 
 -6 -6 2 29.49 1.2 
 6 -6 -2 29.99 1.38 
 6 -6 -2 30.32 1.44 
 -6 -6 2 30.34 1.16 
 -6 -6 2 29.65 1.24 
 6 6 -2 30.4 1.49 
 6 6 -2 31.04 1.22 
 -6 6 2 29.81 1.44 
 -6 6 2 29.82 1.52 
 -6 6 2 27.77 1.5 
 -5 -6 2 42.39 1.49 
 -5 -6 2 42.34 1.54 
 5 -6 -2 43.65 1.73 
 5 -6 -2 41.87 1.68 
 5 -6 -2 45.73 1.84 
 -5 -6 2 45.29 1.76 
 -5 6 2 42.71 1.79 
 5 6 -2 42.21 1.79 
 -5 6 2 42.1 1.73 
 -5 6 2 42.69 1.79 
 -4 -6 2 2.33 0.32 
 -4 -6 2 3.24 0.45 
 4 -6 -2 1.37 0.48 
 4 -6 -2 2.74 0.58 
 -4 -6 2 1.6 0.45 
 4 6 -2 2.8 0.6 
 -4 6 2 2.11 0.49 
 -4 6 2 2.78 0.57 
 -4 6 2 1.29 0.51 
 3 -6 -2 1.12 0.39 
 -3 -6 2 2.03 0.42 
 -3 -6 2 0.92 0.39 
 -3 -6 2 1.22 0.21 
 3 -6 -2 1.55 0.46 
 -3 6 2 0.87 0.52 
 3 6 -2 1.46 0.51 
 -3 6 2 0.99 0.4 
 -3 6 2 0.39 0.41 
 -2 -6 2 1.99 0.42 
 2 -6 -2 1.81 0.35 
 2 -6 -2 1.98 0.45 
 -2 -6 2 2.38 0.42 
 -2 6 2 2.48 0.37 
 -2 6 2 3.57 0.51 
 -2 6 2 2.79 0.48 
 -2 6 2 1.89 0.52 
 1 -6 -2 7.59 0.66 
 1 -6 -2 5.8 0.4 
 -1 -6 2 8.46 0.68 
 1 -6 -2 7.41 0.63 
 -1 -6 2 6.26 0.29 
 1 -6 -2 7.8 0.63 
 -1 -6 2 7.05 0.54 
 -1 6 2 6.53 0.46 
 -1 6 2 5.85 0.52 
 -1 6 2 6.45 0.64 
 -1 6 2 6.39 0.6 
 0 -6 -2 0.37 0.31 
 0 -6 -2 0.07 0.3 
 0 -6 -2 0.56 0.17 
 0 -6 2 0.35 0.21 
 0 -6 2 0.13 0.26 
 0 -6 2 0.56 0.39 
 0 -6 -2 -0.07 0.39 
 0 6 -2 0.52 0.21 
 0 6 2 -0.16 0.41 
 0 6 2 0.39 0.28 
 1 -6 2 0.57 0.24 
 -1 -6 -2 0.4 0.27 
 -1 -6 -2 0.27 0.19 
 1 -6 2 0.45 0.3 
 1 -6 2 -0.09 0.28 
 -1 -6 -2 0.42 0.45 
 1 -6 2 0.29 0.44 
 -1 -6 -2 0.3 0.3 
 -1 6 -2 0.37 0.29 
 -1 6 -2 0.53 0.28 
 1 6 2 0.27 0.47 
 -2 -6 -2 0.16 0.29 
 2 -6 2 0.18 0.4 
 2 -6 2 -0.4 0.38 
 -2 -6 -2 0.45 0.24 
 -2 -6 -2 -0.13 0.21 
 -2 -6 -2 -0.31 0.44 
 2 -6 2 0.07 0.36 
 2 -6 2 0.24 0.22 
 -2 6 -2 0.1 0.27 
 2 6 2 0.26 0.24 
 -2 6 -2 0.01 0.31 
 -2 6 -2 0.62 0.5 
 3 -6 2 5.4 0.43 
 -3 -6 -2 5.07 0.5 
 -3 -6 -2 5.71 0.45 
 3 -6 2 4.99 0.68 
 3 -6 2 4.94 0.6 
 -3 -6 -2 4.71 0.38 
 -3 -6 -2 5.56 0.69 
 -3 6 -2 4.15 0.6 
 -3 6 -2 4.59 0.55 
 -3 6 -2 5.15 0.44 
 3 6 2 5.54 0.48 
 -4 -6 -2 29.26 1.37 
 4 -6 2 31 1.14 
 -4 -6 -2 30.06 1.15 
 -4 -6 -2 28.11 1.21 
 4 -6 2 32.33 1.45 
 4 -6 2 29.24 1.34 
 -4 -6 -2 29.39 0.95 
 -4 6 -2 27.73 1.28 
 -4 6 -2 29.52 1.41 
 4 6 2 28.61 1.2 
 -4 6 -2 29.07 1.11 
 -5 -6 -2 35.65 1.42 
 5 -6 2 34.56 1.6 
 -5 -6 -2 33.67 1.43 
 5 -6 2 37.73 1.38 
 5 -6 2 35.25 1.61 
 -5 -6 -2 39.1 1.61 
 -5 6 -2 35.58 1.35 
 -5 6 -2 36.46 1.58 
 -5 6 -2 35.96 1.67 
 -6 -6 -2 19.54 1.09 
 6 -6 2 17.91 1.21 
 6 -6 2 17.49 1.14 
 -6 -6 -2 17.02 1.05 
 -6 -6 -2 18.94 1.21 
 -6 6 -2 14.1 1.1 
 -6 6 -2 15.76 1.25 
 -7 -6 -2 3 0.63 
 -7 -6 -2 4.35 0.66 
 7 -6 2 2.62 0.68 
 7 -6 2 2.17 0.62 
 -7 6 -2 3.33 0.77 
 -7 6 -2 3.36 0.7 
 -8 -6 -2 1.88 0.61 
 -8 -6 -2 1.43 0.61 
 8 -6 2 1.49 0.62 
 -8 6 -2 1.05 0.63 
 -8 6 -2 1.24 0.65 
 9 -6 2 11.41 1.1 
 -9 -6 -2 11.18 1.14 
 -9 -6 -2 10.84 1.09 
 -9 6 -2 11.97 1.31 
 -9 6 -2 11.24 1.17 
 -10 -6 -2 7.41 1.07 
 -10 -6 -2 6.3 0.95 
 10 -6 2 7.11 0.94 
 -10 6 -2 5.13 1.03 
 -10 6 -2 5.48 1.03 
 -11 -6 -2 33.21 1.93 
 11 -6 2 30.52 1.75 
 -11 -6 -2 30.25 1.97 
 -11 6 -2 32.01 2.05 
 -12 -6 -2 0.39 0.9 
 -12 -6 -2 0.73 0.81 
 -12 6 -2 -0.55 0.93 
 -13 -6 -2 -0.48 0.96 
 -13 -6 -2 -0.83 0.8 
 -13 6 -2 0.56 1.08 
 -14 -7 2 6 1.48 
 -14 -7 2 5.43 1.18 
 -14 7 2 6.55 1.41 
 -13 -7 2 2.13 0.95 
 -13 -7 2 2.06 1.19 
 -13 7 2 4.83 1.3 
 -12 -7 2 10.51 1.28 
 -12 -7 2 9.64 1.42 
 -12 7 2 9.77 1.52 
 -11 -7 2 1.13 0.7 
 -11 -7 2 0.79 0.91 
 -11 7 2 1.34 0.83 
 -10 -7 2 3.63 0.97 
 10 -7 -2 3.87 0.7 
 -10 -7 2 3.54 0.75 
 -10 7 2 1.76 0.88 
 -10 7 2 1.63 0.78 
 9 -7 -2 0.3 0.51 
 -9 -7 2 1.38 0.57 
 9 -7 -2 0.9 0.67 
 -9 -7 2 0.2 0.68 
 -9 7 2 2.04 0.79 
 -9 7 2 1.25 0.73 
 -8 -7 2 1.52 0.65 
 8 -7 -2 2.62 0.72 
 -8 -7 2 2.44 0.41 
 -8 -7 2 1.97 0.52 
 8 -7 -2 2.67 0.63 
 -8 7 2 2.24 0.68 
 8 7 -2 1.66 0.68 
 -8 7 2 1 0.62 
 7 -7 -2 0.27 0.46 
 7 -7 -2 0.37 0.55 
 -7 -7 2 0.23 0.38 
 -7 -7 2 0.93 0.56 
 -7 -7 2 -0.23 0.3 
 7 -7 -2 0.61 0.54 
 -7 -7 2 -0.31 0.25 
 -7 7 2 0.59 0.58 
 -7 7 2 -0.27 0.47 
 7 7 -2 0.08 0.56 
 6 -7 -2 -0.5 0.42 
 6 -7 -2 0.14 0.45 
 -6 -7 2 0.23 0.31 
 -6 -7 2 0.36 0.28 
 -6 -7 2 0.33 0.46 
 -6 -7 2 -0.32 0.31 
 6 -7 -2 0.75 0.53 
 6 7 -2 0.4 0.5 
 -6 7 2 -0.37 0.45 
 -6 7 2 0.24 0.52 
 -5 -7 2 3.75 0.5 
 -5 -7 2 4.27 0.43 
 5 -7 -2 4.36 0.64 
 5 -7 -2 3.87 0.65 
 -5 -7 2 4.2 0.6 
 5 -7 -2 4.43 0.66 
 -5 7 2 4.23 0.64 
 -5 7 2 3.13 0.58 
 5 7 -2 4.32 0.68 
 -4 -7 2 1.18 0.26 
 4 -7 -2 1.27 0.48 
 -4 -7 2 0.69 0.37 
 -4 -7 2 1.09 0.42 
 -4 7 2 1.22 0.43 
 -4 7 2 0.92 0.52 
 -4 7 2 0.89 0.46 
 4 7 -2 -0.07 0.45 
 -3 -7 2 59.16 2.08 
 -3 -7 2 60.4 2.04 
 3 -7 -2 58.49 2.1 
 -3 -7 2 59.5 1.73 
 3 -7 -2 61.99 2.01 
 -3 7 2 60.17 2.03 
 3 7 -2 60.69 2.18 
 -2 -7 2 124.15 3.71 
 2 -7 -2 119.56 3.72 
 -2 -7 2 120.61 3.7 
 2 -7 -2 124.14 3.59 
 -2 7 2 118.79 3.7 
 -2 7 2 122.39 3.59 
 2 7 -2 120.05 3.8 
 1 -7 -2 15.67 0.67 
 -1 -7 2 16.29 0.81 
 -1 -7 2 16.1 0.56 
 1 -7 -2 17.98 0.89 
 1 -7 -2 17.16 0.97 
 -1 -7 2 15.83 0.94 
 1 7 -2 17.06 1 
 -1 7 2 16.53 0.86 
 0 -7 -2 10.7 0.68 
 0 -7 2 10.84 0.54 
 0 -7 -2 10.53 0.71 
 0 -7 2 10.45 0.63 
 0 -7 -2 10.96 0.48 
 0 -7 2 11.1 0.8 
 0 -7 -2 10.61 0.76 
 0 7 -2 10.97 0.89 
 0 7 -2 10.12 0.49 
 -1 -7 -2 11.78 0.87 
 1 -7 2 11.57 0.62 
 1 -7 2 12.52 0.75 
 -1 -7 -2 11.68 0.53 
 1 -7 2 11.36 0.67 
 1 -7 2 11.05 0.9 
 -1 -7 -2 11.47 0.69 
 -1 -7 -2 13.06 0.71 
 -1 7 -2 11.09 0.63 
 -1 7 -2 9.77 0.82 
 -1 7 -2 12.17 0.67 
 -2 -7 -2 13.35 0.93 
 2 -7 2 16.35 0.71 
 -2 -7 -2 16.17 0.8 
 2 -7 2 16.56 0.87 
 -2 -7 -2 16.21 0.68 
 2 -7 2 16.75 1.03 
 -2 -7 -2 14.9 0.74 
 -2 7 -2 16.75 0.83 
 -2 7 -2 16.39 0.99 
 -2 7 -2 15.74 0.75 
 3 -7 2 14.17 0.69 
 3 -7 2 11.81 0.93 
 -3 -7 -2 13.2 0.63 
 -3 -7 -2 12.15 0.73 
 -3 -7 -2 13.44 0.92 
 -3 -7 -2 11.79 0.64 
 3 -7 2 13.48 0.89 
 -3 7 -2 13.33 0.85 
 -3 7 -2 13.32 0.7 
 -3 7 -2 12.66 0.89 
 3 7 2 12.57 0.69 
 4 -7 2 7.67 0.76 
 -4 -7 -2 6.85 0.57 
 4 -7 2 5.68 0.75 
 4 -7 2 6.6 0.56 
 -4 -7 -2 6.86 0.77 
 -4 -7 -2 6.74 0.43 
 -4 -7 -2 6.87 0.6 
 -4 7 -2 6.36 0.77 
 4 7 2 7.36 0.62 
 -4 7 -2 6.78 0.55 
 5 -7 2 0.47 0.51 
 -5 -7 -2 -0.02 0.33 
 -5 -7 -2 1.09 0.41 
 -5 -7 -2 0.58 0.2 
 5 -7 2 -0.05 0.45 
 -5 -7 -2 0.74 0.18 
 -5 -7 -2 1.45 0.58 
 5 -7 2 0.24 0.36 
 -5 7 -2 0.98 0.35 
 5 7 2 1.07 0.44 
 -5 7 -2 0.44 0.55 
 -5 7 -2 0.22 0.42 
 -6 -7 -2 44.46 1.97 
 -6 -7 -2 47.94 1.78 
 6 -7 2 46.34 1.97 
 6 -7 2 45.94 1.96 
 6 -7 2 43.38 1.67 
 -6 -7 -2 44.59 1.76 
 -6 7 -2 42.76 1.94 
 -6 7 -2 42.75 1.89 
 6 7 2 44.91 1.76 
 -7 -7 -2 29.95 1.6 
 -7 -7 -2 26.68 1.43 
 7 -7 2 30.1 1.63 
 -7 -7 -2 34.19 1.52 
 7 -7 2 32.2 1.69 
 -7 7 -2 33.81 1.75 
 -7 7 -2 32.72 1.64 
 8 -7 2 3.24 0.8 
 8 -7 2 2.26 0.69 
 -8 -7 -2 3.58 0.74 
 -8 -7 -2 4 0.71 
 -8 7 -2 2.05 0.63 
 -8 7 -2 3.27 0.86 
 -9 -7 -2 2.61 0.75 
 -9 -7 -2 2.1 0.69 
 9 -7 2 4.59 0.84 
 -9 7 -2 3.62 0.96 
 -9 7 -2 2.33 0.75 
 -10 -7 -2 8.49 1.16 
 10 -7 2 9.12 1.07 
 -10 -7 -2 7.89 1.02 
 -10 7 -2 10.9 1.4 
 11 -7 2 7.01 1.02 
 -11 -7 -2 7.37 1.21 
 -11 -7 -2 5.47 0.99 
 -11 7 -2 5.39 1.21 
 -12 -7 -2 1.82 1.01 
 -12 -7 -2 -1.18 0.72 
 -12 7 -2 -0.76 0.9 
 -13 -7 -2 -0.2 0.94 
 -13 -7 -2 -0.01 0.87 
 -13 7 -2 0.07 1.1 
 -13 -8 2 1.72 0.94 
 -13 -8 2 1.93 1.15 
 -13 8 2 0.39 1.09 
 -12 -8 2 -0.62 0.68 
 -12 -8 2 -0.72 0.89 
 -12 8 2 -0.83 0.95 
 -11 -8 2 0.61 0.89 
 -11 -8 2 0.46 0.69 
 -11 8 2 0.38 0.81 
 -10 -8 2 0.12 0.76 
 -10 -8 2 0.93 0.62 
 10 -8 -2 -0.38 0.53 
 -10 8 2 0.87 0.73 
 -9 -8 2 19.71 1.22 
 9 -8 -2 17.48 1.27 
 -9 -8 2 21.21 1.54 
 9 -8 -2 17.81 1.44 
 -9 8 2 21.43 1.57 
 -9 8 2 18.79 1.5 
 -8 -8 2 23.28 1.5 
 -8 -8 2 23.36 1.21 
 8 -8 -2 20.51 1.32 
 -8 -8 2 20.82 1.03 
 8 -8 -2 21.32 1.38 
 8 8 -2 21.56 1.46 
 -8 8 2 20.33 1.4 
 -8 8 2 24.16 1.52 
 7 -8 -2 0.72 0.54 
 -7 -8 2 1.38 0.56 
 7 -8 -2 0.71 0.53 
 7 -8 -2 0.63 0.58 
 -7 -8 2 0.76 0.4 
 -7 -8 2 0.02 0.35 
 7 8 -2 0.08 0.53 
 -7 8 2 0.91 0.57 
 -7 8 2 -0.61 0.46 
 -6 -8 2 64.56 2.11 
 -6 -8 2 62.28 2.17 
 6 -8 -2 65.54 2.54 
 6 -8 -2 61.72 2.41 
 -6 -8 2 66.54 2.44 
 6 -8 -2 63.36 2.38 
 -6 8 2 65.38 2.49 
 6 8 -2 62.45 2.45 
 -6 8 2 64.25 2.43 
 5 -8 -2 0.82 0.5 
 -5 -8 2 0.71 0.4 
 -5 -8 2 0.89 0.45 
 -5 -8 2 1.14 0.31 
 5 -8 -2 1.04 0.53 
 -5 8 2 1.46 0.54 
 5 8 -2 1.09 0.53 
 -5 8 2 1.72 0.51 
 -4 -8 2 14.85 0.62 
 -4 -8 2 15.13 0.87 
 -4 -8 2 14.44 0.93 
 4 -8 -2 16.29 1 
 -4 8 2 14.88 0.97 
 4 8 -2 12.26 1 
 -4 8 2 15.37 0.91 
 -3 -8 2 3.19 0.21 
 -3 -8 2 2.49 0.52 
 3 -8 -2 2.44 0.44 
 -3 -8 2 2.62 0.48 
 -3 -8 2 2.57 0.49 
 3 -8 -2 3.44 0.55 
 3 8 -2 3.49 0.64 
 -3 8 2 2.74 0.48 
 2 -8 -2 0.04 0.29 
 2 -8 -2 0.57 0.45 
 -2 -8 2 0 0.36 
 -2 -8 2 0.14 0.33 
 2 8 -2 0.14 0.44 
 -2 8 2 0.19 0.35 
 -2 8 2 0.23 0.31 
 -1 -8 2 1.26 0.19 
 -1 -8 2 1.32 0.38 
 1 -8 -2 0.89 0.44 
 1 -8 -2 0.7 0.25 
 1 -8 -2 0.44 0.36 
 -1 -8 2 0.86 0.43 
 1 8 -2 1.56 0.53 
 -1 8 2 1.6 0.39 
 0 -8 2 0.64 0.32 
 0 -8 -2 0.16 0.2 
 0 -8 -2 0 0.42 
 0 -8 -2 0.3 0.31 
 0 -8 2 0 0.23 
 0 -8 2 0.38 0.47 
 0 8 -2 -0.21 0.44 
 0 8 -2 0.57 0.21 
 1 -8 2 31.76 1.49 
 -1 -8 -2 32.37 1.26 
 1 -8 2 33.77 1.25 
 1 -8 2 33.21 1.23 
 -1 -8 -2 33.3 1.32 
 -1 -8 -2 35.14 1.12 
 -1 -8 -2 33.07 1.46 
 -1 8 -2 34.68 1.21 
 -1 8 -2 34.65 1.28 
 -1 8 -2 32.81 1.52 
 -2 -8 -2 37.67 1.4 
 -2 -8 -2 39.67 1.3 
 2 -8 2 36.57 1.7 
 -2 -8 -2 37.63 1.39 
 -2 -8 -2 39.85 1.64 
 2 -8 2 38.13 1.35 
 2 -8 2 38.66 1.46 
 -2 8 -2 40.61 1.68 
 -2 8 -2 35.57 1.4 
 -2 8 -2 39.4 1.38 
 -3 -8 -2 -0.14 0.23 
 -3 -8 -2 -0.41 0.24 
 3 -8 2 0.16 0.46 
 3 -8 2 0.21 0.28 
 -3 -8 -2 0.15 0.3 
 3 -8 2 -0.12 0.37 
 -3 -8 -2 0.64 0.53 
 -3 8 -2 -0.01 0.51 
 -3 8 -2 -0.09 0.35 
 -3 8 -2 -0.12 0.29 
 -4 -8 -2 30.3 1.22 
 4 -8 2 33.98 1.47 
 4 -8 2 30.22 1.57 
 -4 -8 -2 32.33 1.14 
 -4 -8 -2 31.11 1.27 
 -4 -8 -2 30.01 1.49 
 4 -8 2 32.32 1.24 
 4 8 2 32.25 1.37 
 -4 8 -2 32.88 1.42 
 4 8 2 32.01 1.27 
 -4 8 -2 31.91 1.22 
 -4 8 -2 32.94 1.55 
 -5 -8 -2 10.64 0.51 
 5 -8 2 10.19 0.89 
 -5 -8 -2 7.85 0.86 
 -5 -8 -2 10.01 0.7 
 5 -8 2 9.12 0.95 
 -5 -8 -2 8.87 0.51 
 -5 -8 -2 10.64 0.76 
 5 -8 2 10.04 0.73 
 -5 8 -2 5.95 0.7 
 -5 8 -2 11.05 0.98 
 -5 8 -2 8.75 0.68 
 5 8 2 10.34 0.8 
 6 -8 2 20.16 1.08 
 -6 -8 -2 21.8 1.16 
 6 -8 2 21.86 1.35 
 -6 -8 -2 21.04 1.33 
 6 -8 2 24.25 1.42 
 -6 -8 -2 23.67 1.16 
 -6 8 -2 20.22 1.32 
 -6 8 -2 23.4 1.32 
 6 8 2 22.73 1.19 
 -7 -8 -2 0.76 0.49 
 7 -8 2 1.73 0.69 
 -7 -8 -2 1.43 0.52 
 -7 -8 -2 1.64 0.74 
 7 -8 2 1.16 0.65 
 -7 8 -2 1.22 0.55 
 7 8 2 2.35 0.57 
 -7 8 -2 1.63 0.65 
 8 -8 2 -0.61 0.55 
 -8 -8 -2 0.84 0.57 
 -8 -8 -2 -0.1 0.49 
 -8 -8 -2 0.75 0.67 
 -8 8 -2 -0.53 0.6 
 -8 8 -2 -0.26 0.49 
 -9 -8 -2 0.26 0.58 
 -9 -8 -2 -0.29 0.6 
 9 -8 2 -0.36 0.58 
 -9 -8 -2 -0.4 0.69 
 -9 8 -2 0.38 0.79 
 10 -8 2 4.95 0.93 
 -10 -8 -2 7.27 0.98 
 -10 -8 -2 8.1 1.1 
 -10 -8 -2 5.82 1.14 
 -10 8 -2 6.81 1.2 
 -11 -8 -2 -0.2 0.7 
 -11 -8 -2 -0.02 0.81 
 -11 -8 -2 0.25 0.81 
 11 -8 2 0.81 0.71 
 -11 8 -2 1.13 0.89 
 -12 -8 -2 4.98 1.14 
 -12 -8 -2 8.3 1.22 
 -12 -8 -2 6.17 1.2 
 -12 8 -2 6.02 1.26 
 -13 -8 -2 2.8 1.16 
 -13 -8 -2 1.55 1.1 
 -13 -8 -2 1.58 0.93 
 -13 8 -2 3.13 1.25 
 -13 -9 2 2.64 1.17 
 -13 -9 2 2.97 0.94 
 -13 9 2 0.24 0.95 
 -12 -9 2 12.48 1.3 
 -12 -9 2 10.63 1.49 
 -12 9 2 11.88 1.63 
 -11 -9 2 3.8 0.83 
 -11 -9 2 8.18 1.27 
 -11 9 2 4.5 1.14 
 -10 -9 2 0.96 0.62 
 10 -9 -2 0.51 0.75 
 -10 -9 2 0.42 0.77 
 10 -9 -2 0.87 0.64 
 -10 9 2 0.24 0.74 
 -9 -9 2 0.6 0.53 
 -9 -9 2 0.77 0.7 
 9 -9 -2 0.79 0.64 
 9 -9 -2 0.13 0.68 
 -9 9 2 0.45 0.68 
 9 9 -2 1.09 0.73 
 -8 -9 2 4.74 0.87 
 -8 -9 2 3.46 0.59 
 8 -9 -2 3.53 0.75 
 8 -9 -2 3.73 0.77 
 -8 -9 2 4 0.55 
 -8 9 2 3.39 0.83 
 8 9 -2 5.28 0.95 
 -8 9 2 3.05 0.77 
 7 -9 -2 -0.35 0.6 
 7 -9 -2 1.09 0.6 
 7 -9 -2 1.79 0.64 
 -7 -9 2 1.91 0.47 
 -7 -9 2 2.46 0.67 
 -7 -9 2 1.21 0.43 
 -7 9 2 1.48 0.66 
 -7 9 2 1.3 0.6 
 7 9 -2 1.26 0.68 
 -6 -9 2 0.79 0.41 
 -6 -9 2 0.51 0.33 
 6 -9 -2 0.64 0.54 
 -6 -9 2 1.3 0.53 
 6 -9 -2 0.07 0.56 
 6 -9 -2 -0.14 0.51 
 -6 9 2 0.81 0.52 
 -6 9 2 -0.05 0.5 
 6 9 -2 0.76 0.56 
 -5 -9 2 2.55 0.51 
 -5 -9 2 2.02 0.33 
 5 -9 -2 3.16 0.67 
 -5 -9 2 2.47 0.54 
 5 -9 -2 2.86 0.6 
 5 9 -2 2.81 0.69 
 -5 9 2 3.1 0.59 
 -5 9 2 1.8 0.57 
 -4 -9 2 0.71 0.4 
 -4 -9 2 0.41 0.19 
 -4 -9 2 0.98 0.43 
 4 -9 -2 -0.13 0.43 
 -4 -9 2 0.5 0.5 
 -4 9 2 0.22 0.41 
 4 9 -2 0.84 0.53 
 -4 9 2 0.02 0.14 
 -3 -9 2 21.8 1.15 
 -3 -9 2 21.24 1.09 
 3 -9 -2 22.18 1.04 
 -3 -9 2 22.38 1.11 
 3 -9 -2 21.81 1.16 
 -3 9 2 22.19 1.05 
 -3 9 2 21.34 1.14 
 3 9 -2 20.53 1.22 
 2 -9 -2 4.31 0.62 
 -2 -9 2 3.43 0.52 
 2 -9 -2 3.94 0.47 
 -2 -9 2 3.68 0.55 
 -2 9 2 4.79 0.5 
 -2 9 2 4.28 0.57 
 2 9 -2 5.35 0.71 
 1 -9 -2 0.25 0.36 
 1 -9 -2 0.6 0.45 
 -1 -9 2 0.27 0.37 
 1 -9 -2 0.2 0.24 
 -1 -9 2 0.67 0.38 
 -1 9 2 0.64 0.5 
 1 9 -2 0.27 0.47 
 -1 9 2 -0.07 0.31 
 0 -9 2 20.68 1.21 
 0 -9 -2 19.52 1.12 
 0 -9 -2 20.75 0.79 
 0 -9 2 22.13 0.85 
 0 -9 -2 19.5 0.96 
 0 -9 2 19.82 0.95 
 0 9 2 20.5 0.95 
 0 9 -2 18.97 1.13 
 0 9 2 19.75 1.13 
 0 9 -2 19.89 0.79 
 1 -9 2 5.93 0.53 
 -1 -9 -2 5.59 0.45 
 -1 -9 -2 6.41 0.54 
 1 -9 2 5.96 0.76 
 -1 -9 -2 4.8 0.65 
 1 -9 2 6.81 0.55 
 -1 9 -2 6.36 0.83 
 -1 9 -2 6.01 0.48 
 -1 9 -2 6.36 0.6 
 1 9 2 7.23 0.75 
 -2 -9 -2 24.82 1.32 
 2 -9 2 24.48 1.13 
 -2 -9 -2 25.62 1.2 
 -2 -9 -2 25.54 1.08 
 2 -9 2 23.56 1.38 
 -2 -9 -2 25.89 0.98 
 2 -9 2 25.3 1.04 
 -2 9 -2 25.66 1.37 
 -2 9 -2 26.72 1.09 
 -2 9 -2 25.42 1.1 
 2 9 2 24.86 1.18 
 -3 -9 -2 0.37 0.32 
 -3 -9 -2 0.76 0.49 
 -3 -9 -2 0.59 0.29 
 3 -9 2 1.03 0.32 
 3 -9 2 0.18 0.39 
 -3 -9 -2 0.66 0.28 
 3 -9 2 0.4 0.51 
 -3 9 -2 0.6 0.35 
 -3 9 -2 0.75 0.39 
 -3 9 -2 1.24 0.59 
 3 9 2 0.72 0.43 
 4 -9 2 27.6 1.51 
 4 -9 2 24.95 1.31 
 -4 -9 -2 26.13 1.15 
 -4 -9 -2 26.8 1.05 
 -4 -9 -2 26.03 1.41 
 4 -9 2 26.8 1.12 
 -4 -9 -2 25.9 1.1 
 -4 9 -2 24.39 1.34 
 -4 9 -2 28.7 1.14 
 4 9 2 27.16 1.14 
 4 9 2 30.15 1.3 
 -4 9 -2 25.53 1.26 
 -5 -9 -2 2.26 0.46 
 5 -9 2 2.01 0.46 
 -5 -9 -2 2.71 0.38 
 -5 -9 -2 1.98 0.41 
 5 -9 2 2.86 0.67 
 -5 -9 -2 2.61 0.7 
 -5 -9 -2 2.74 0.34 
 5 -9 2 3.48 0.66 
 -5 9 -2 2.36 0.69 
 5 9 2 2.7 0.56 
 -6 -9 -2 27.2 1.26 
 6 -9 2 24.49 1.53 
 6 -9 2 27.79 1.51 
 -6 -9 -2 24.02 1.22 
 -6 -9 -2 24.43 1.55 
 -6 -9 -2 26.11 0.92 
 6 -9 2 27.39 1.25 
 -6 -9 -2 26.72 0.94 
 -6 9 -2 25.78 1.42 
 -6 9 -2 27.41 1.56 
 6 9 2 27.44 1.35 
 7 -9 2 1.57 0.69 
 -7 -9 -2 2.38 0.78 
 -7 -9 -2 3.35 0.62 
 -7 -9 -2 2.22 0.56 
 7 -9 2 2.36 0.57 
 7 9 2 1.92 0.6 
 -7 9 -2 1.82 0.69 
 -7 9 -2 2.69 0.65 
 -8 -9 -2 0.65 0.53 
 -8 -9 -2 1.12 0.78 
 8 -9 2 1.32 0.7 
 -8 -9 -2 1.01 0.58 
 -8 9 -2 -0.07 0.7 
 -9 -9 -2 0.83 0.6 
 -9 -9 -2 0.02 0.64 
 -9 -9 -2 2.1 0.86 
 9 -9 2 0.03 0.66 
 -9 9 -2 0.46 0.83 
 -10 -9 -2 -0.46 0.72 
 -10 -9 -2 1.52 0.76 
 -10 -9 -2 0.86 0.66 
 10 -9 2 1.83 0.82 
 -10 9 -2 0.91 0.84 
 11 -9 2 6.39 1.09 
 -11 -9 -2 7.29 1.19 
 -11 -9 -2 5.66 1.19 
 -11 -9 -2 6.54 1.02 
 -11 9 -2 6.8 1.34 
 -12 -9 -2 1.64 0.97 
 -12 -9 -2 3.67 0.95 
 -12 -9 -2 2.58 1.06 
 -12 9 -2 1.9 1.06 
 -13 -9 -2 -0.6 0.82 
 -13 -9 -2 -1.35 0.92 
 -13 -9 -2 0.76 1.12 
 -13 9 -2 -0.76 1.1 
 -13 -10 2 4.55 1.02 
 -13 -10 2 4.48 1.27 
 -13 10 2 1.32 1.17 
 -12 -10 2 0.99 0.98 
 -12 -10 2 0.49 0.73 
 -12 10 2 3.22 1.23 
 -11 -10 2 2.78 0.74 
 -11 -10 2 1.7 0.94 
 -11 10 2 2.63 0.96 
 -10 -10 2 2.15 0.65 
 10 -10 -2 2.19 0.77 
 10 -10 -2 1.71 0.81 
 -10 -10 2 2.46 0.91 
 -10 10 2 1.74 0.83 
 9 -10 -2 10.88 1.17 
 9 -10 -2 8.44 1.12 
 -9 -10 2 10.45 0.93 
 -9 -10 2 8.98 1.14 
 9 10 -2 11.35 1.32 
 -9 10 2 12.6 1.38 
 8 -10 -2 17.55 1.4 
 8 -10 -2 16.3 1.29 
 -8 -10 2 16.7 0.99 
 -8 -10 2 20.33 1.41 
 -8 -10 2 17.51 1.06 
 8 10 -2 18.71 1.41 
 -8 10 2 16.2 1.31 
 7 -10 -2 14.73 1.23 
 -7 -10 2 15.47 1.18 
 -7 -10 2 13.29 0.86 
 7 -10 -2 15.92 1.34 
 -7 -10 2 13.18 0.91 
 7 10 -2 12.04 1.21 
 -7 10 2 13.99 1.24 
 -6 -10 2 31.99 1.41 
 6 -10 -2 33.65 1.62 
 -6 -10 2 34.26 1.27 
 -6 -10 2 36.72 1.65 
 6 -10 -2 33.4 1.73 
 -6 10 2 30.75 1.59 
 -6 10 2 33.37 1.69 
 6 10 -2 33.08 1.69 
 5 -10 -2 1.45 0.55 
 -5 -10 2 1.17 0.62 
 5 -10 -2 -0.58 0.49 
 -5 -10 2 0.43 0.45 
 -5 -10 2 0.4 0.43 
 -5 -10 2 0.7 0.27 
 5 10 -2 0.77 0.55 
 -5 10 2 0.99 0.44 
 -5 10 2 0.88 0.5 
 -4 -10 2 1.32 0.47 
 -4 -10 2 1.33 0.19 
 -4 -10 2 1.32 0.47 
 -4 -10 2 1.34 0.58 
 4 -10 -2 2.21 0.57 
 -4 10 2 0.4 0.37 
 -4 10 2 1.45 0.48 
 4 10 -2 1.26 0.58 
 -3 -10 2 45.82 1.73 
 -3 -10 2 43.15 1.72 
 -3 -10 2 43.79 1.79 
 3 -10 -2 42.51 1.76 
 -3 10 2 43.86 1.75 
 3 10 -2 43.27 1.88 
 -3 10 2 42.38 1.66 
 2 -10 -2 44.58 1.55 
 2 -10 -2 44.87 1.79 
 -2 -10 2 43.35 1.66 
 -2 -10 2 41.51 1.69 
 -2 10 2 41.9 1.65 
 2 10 -2 41.28 1.83 
 -1 -10 2 -0.44 0.4 
 -1 -10 2 -0.23 0.32 
 1 -10 -2 0.04 0.43 
 1 -10 -2 -0.17 0.22 
 1 -10 -2 -0.37 0.34 
 -1 10 2 0.16 0.32 
 -1 10 2 0.59 0.49 
 1 10 -2 0.84 0.53 
 0 -10 -2 8.39 0.51 
 0 -10 -2 8.72 0.7 
 0 -10 2 9.69 0.73 
 0 -10 2 6.84 0.8 
 0 -10 2 8.83 0.57 
 0 -10 -2 9.52 0.88 
 0 10 2 7.78 0.8 
 0 10 2 8.34 0.63 
 0 10 -2 6.83 0.83 
 1 -10 2 36.25 1.4 
 -1 -10 -2 38.23 1.41 
 -1 -10 -2 35.49 1.61 
 -1 -10 -2 36.16 1.25 
 1 -10 2 34.7 1.67 
 1 -10 2 38.67 1.4 
 1 10 2 37.64 1.59 
 -1 10 -2 36.63 1.3 
 -1 10 -2 32 1.61 
 -2 -10 -2 3.55 0.67 
 2 -10 2 4.75 0.58 
 2 -10 2 4.41 0.51 
 -2 -10 -2 3.86 0.43 
 -2 -10 -2 3.57 0.47 
 2 -10 2 3.82 0.68 
 2 10 2 4.9 0.68 
 -2 10 -2 4.51 0.6 
 -2 10 -2 3.21 0.68 
 -2 10 -2 3.9 0.49 
 -3 -10 -2 26.07 1.41 
 3 -10 2 23.47 1.2 
 -3 -10 -2 23.4 1.05 
 3 -10 2 23.11 1.03 
 3 -10 2 24.83 1.42 
 -3 -10 -2 23.04 0.99 
 -3 10 -2 23.39 1.1 
 -3 10 -2 23.28 1.14 
 -3 10 -2 21.61 1.38 
 3 10 2 24.33 1.22 
 -4 -10 -2 4.49 0.73 
 4 -10 2 2.02 0.66 
 -4 -10 -2 4.46 0.47 
 4 -10 2 4.6 0.65 
 -4 -10 -2 4.19 0.51 
 -4 -10 -2 3.89 0.48 
 4 -10 2 6.04 0.6 
 -4 10 -2 4.13 0.79 
 4 10 2 4.36 0.66 
 -4 10 -2 2.93 0.56 
 -5 -10 -2 1.62 0.33 
 5 -10 2 1.55 0.55 
 5 -10 2 0.38 0.56 
 5 -10 2 1.68 0.47 
 -5 -10 -2 1.73 0.44 
 -5 -10 -2 1.04 0.36 
 -5 -10 -2 1.94 0.43 
 -5 -10 -2 1.94 0.73 
 5 10 2 1.9 0.55 
 -5 10 -2 0.95 0.62 
 -5 10 -2 1.22 0.49 
 6 -10 2 6.12 0.95 
 -6 -10 -2 7.44 0.74 
 6 -10 2 6.79 0.71 
 -6 -10 -2 5.13 0.64 
 -6 -10 -2 5.95 0.5 
 6 -10 2 7.13 0.91 
 -6 -10 -2 6.31 0.48 
 -6 -10 -2 7.2 1.01 
 -6 10 -2 7.85 1.01 
 6 10 2 8.22 0.86 
 -7 -10 -2 0.89 0.44 
 7 -10 2 0.23 0.61 
 7 -10 2 1.2 0.51 
 -7 -10 -2 0.18 0.45 
 -7 -10 -2 0.58 0.66 
 7 10 2 -0.84 0.46 
 -7 10 -2 0.1 0.58 
 -8 -10 -2 10.24 1.28 
 -8 -10 -2 5.79 0.79 
 8 -10 2 6.8 1.02 
 -8 -10 -2 7.13 0.88 
 8 10 2 8.76 0.99 
 -8 10 -2 7.08 1.07 
 -9 -10 -2 1.6 0.82 
 -9 -10 -2 1.16 0.65 
 -9 -10 -2 2.2 0.67 
 9 -10 2 0.79 0.73 
 -9 10 -2 1.25 0.81 
 -10 -10 -2 8.61 1.17 
 -10 -10 -2 9.87 1.1 
 10 -10 2 7.2 1.15 
 -10 -10 -2 7.36 1.29 
 -10 10 -2 6.49 1.17 
 -11 -10 -2 1.76 0.9 
 -11 -10 -2 2.26 0.76 
 -11 -10 -2 1.72 1.02 
 11 -10 2 0.66 0.79 
 -11 10 -2 1.36 0.91 
 -12 -10 -2 4.04 1.1 
 -12 -10 -2 5.37 1.34 
 -12 -10 -2 2.95 0.91 
 -12 10 -2 3.8 1.26 
 -12 -11 2 2.81 0.81 
 -12 -11 2 2.98 1.07 
 -12 11 2 1.11 0.91 
 -11 -11 2 15.55 1.64 
 -11 -11 2 14.55 1.24 
 -11 11 2 15.79 1.68 
 -10 -11 2 0.3 0.8 
 10 -11 -2 1.26 0.78 
 10 -11 -2 0.26 0.77 
 -10 -11 2 0.88 0.57 
 10 11 -2 -0.63 0.71 
 -10 11 2 -0.55 0.69 
 -9 -11 2 0.55 0.71 
 9 -11 -2 -0.05 0.68 
 -9 -11 2 0.94 0.52 
 9 -11 -2 1.12 0.74 
 -9 11 2 0.46 0.74 
 9 11 -2 0.85 0.81 
 8 -11 -2 0.1 0.61 
 8 -11 -2 0.79 0.67 
 -8 -11 2 -0.02 0.41 
 -8 -11 2 0.68 0.6 
 -8 -11 2 -0.25 0.42 
 8 11 -2 0.12 0.7 
 -8 11 2 -0.63 0.62 
 -7 -11 2 6.5 0.6 
 7 -11 -2 6.58 0.92 
 7 -11 -2 5.54 0.97 
 -7 -11 2 8.33 0.98 
 -7 -11 2 5.79 0.72 
 -7 -11 2 7.1 1.06 
 -7 11 2 6.51 0.95 
 7 11 -2 5.69 0.93 
 6 -11 -2 4.18 0.84 
 -6 -11 2 4.38 0.45 
 -6 -11 2 4.73 0.66 
 -6 -11 2 4.39 0.72 
 6 -11 -2 3.19 0.72 
 -6 -11 2 3.13 0.83 
 -6 11 2 3.83 0.74 
 6 11 -2 4.82 0.84 
 5 -11 -2 2 0.74 
 5 -11 -2 2.22 0.62 
 -5 -11 2 1.97 0.55 
 -5 -11 2 3.25 0.6 
 -5 -11 2 2.58 0.31 
 -5 -11 2 2.55 0.73 
 -5 11 2 3.02 0.63 
 5 11 -2 3.43 0.74 
 4 -11 -2 2.91 0.66 
 -4 -11 2 4.32 0.62 
 -4 -11 2 3.81 0.74 
 -4 -11 2 4.33 0.64 
 -4 11 2 3.81 0.63 
 -4 11 2 4.28 0.64 
 4 11 -2 4.05 0.75 
 -3 -11 2 4.93 0.71 
 -3 -11 2 7.99 0.76 
 3 -11 -2 5.53 0.72 
 3 11 -2 6.07 0.89 
 -3 11 2 5.83 0.68 
 -3 11 2 5.91 0.64 
 2 -11 -2 1.39 0.38 
 -2 -11 2 2.22 0.52 
 -2 -11 2 1.26 0.42 
 2 -11 -2 1.78 0.56 
 -2 11 2 2.03 0.46 
 2 11 -2 2.3 0.63 
 -2 11 2 1.42 0.61 
 1 -11 -2 45.36 1.83 
 -1 -11 2 43.9 1.69 
 -1 -11 2 42.17 1.87 
 1 -11 -2 42.24 1.49 
 -1 11 2 41.53 1.82 
 -1 11 2 43.3 1.63 
 1 11 -2 42.18 1.9 
 0 -11 2 8.95 0.74 
 0 -11 -2 7.89 0.53 
 0 -11 -2 9.5 0.91 
 0 -11 2 8.06 0.89 
 0 -11 -2 7.52 0.69 
 0 11 2 10.48 0.96 
 0 11 -2 10.04 1.02 
 0 11 2 8.89 0.65 
 1 -11 2 13.81 0.82 
 1 -11 2 12.86 0.81 
 -1 -11 -2 13.55 0.81 
 -1 -11 -2 13.29 0.68 
 -1 -11 -2 11.46 1.03 
 1 -11 2 10.72 1.04 
 -1 -11 -2 13.55 0.66 
 1 11 2 13.39 1.01 
 -1 11 -2 16.46 1.29 
 1 11 2 11.5 0.71 
 -2 -11 -2 4.56 0.46 
 2 -11 2 2.59 0.64 
 -2 -11 -2 3.29 0.48 
 2 -11 2 3.62 0.5 
 -2 -11 -2 2.59 0.65 
 2 -11 2 4.07 0.57 
 2 11 2 4.85 0.69 
 -2 11 -2 4.99 0.83 
 -2 11 -2 3.41 0.49 
 3 -11 2 25.9 1.33 
 -3 -11 -2 25.93 1.43 
 3 -11 2 25.89 1.58 
 -3 -11 -2 26.78 1.16 
 -3 -11 -2 25.25 1.1 
 3 -11 2 26.87 1.17 
 3 11 2 27.88 1.36 
 -3 11 -2 28.09 1.5 
 -3 11 -2 28.44 1.26 
 -4 -11 -2 23.81 1.07 
 -4 -11 -2 22.29 1.45 
 4 -11 2 22.78 1.11 
 -4 -11 -2 23 1.1 
 4 -11 2 24.33 1.35 
 4 -11 2 23.4 1.53 
 4 11 2 24.11 1.27 
 -4 11 -2 20.91 1.47 
 -4 11 -2 24.27 1.24 
 5 -11 2 6.47 0.99 
 -5 -11 -2 9.04 1.1 
 -5 -11 -2 7.42 0.69 
 -5 -11 -2 8.29 0.63 
 5 -11 2 8.99 0.76 
 -5 -11 -2 7.75 0.7 
 5 -11 2 7.44 0.89 
 -5 11 -2 7.45 0.9 
 5 11 2 7.88 0.88 
 -6 -11 -2 2.88 0.54 
 -6 -11 -2 1.77 0.79 
 6 -11 2 3.21 0.82 
 -6 -11 -2 2.91 0.44 
 -6 -11 -2 3.32 0.54 
 6 -11 2 2.86 0.56 
 6 11 2 3.79 0.69 
 -6 11 -2 2.27 0.8 
 7 -11 2 5.56 0.72 
 -7 -11 -2 5.17 0.71 
 7 -11 2 4.07 0.9 
 -7 -11 -2 4.05 0.93 
 -7 -11 -2 4.44 0.65 
 -7 11 -2 3.59 0.9 
 7 11 2 5.46 0.85 
 -8 -11 -2 41.27 1.9 
 8 -11 2 41.66 2.19 
 -8 -11 -2 40.63 1.83 
 8 -11 2 41.92 1.82 
 -8 -11 -2 41.59 2.26 
 -8 11 -2 39.9 2.2 
 8 11 2 40.39 1.96 
 -9 -11 -2 1.58 0.68 
 -9 -11 -2 0.52 0.6 
 -9 -11 -2 1.5 0.95 
 9 -11 2 0.52 0.78 
 -9 11 -2 0.89 0.83 
 -10 -11 -2 1.36 0.7 
 10 -11 2 0.81 0.84 
 -10 -11 -2 1.28 0.94 
 -10 -11 -2 0.77 0.76 
 -10 11 -2 0.23 0.82 
 11 -11 2 1.36 0.88 
 -11 -11 -2 -0.86 0.84 
 -11 -11 -2 1.29 0.85 
 -11 -11 -2 0.33 0.73 
 -11 11 -2 0.41 0.96 
 -12 -11 -2 2.85 0.95 
 -12 -11 -2 2.35 1.17 
 -12 -11 -2 3.68 1.13 
 -12 11 -2 3.59 1.17 
 -12 -12 2 -0.39 0.9 
 -12 -12 2 -0.7 1.04 
 -12 -12 2 1.42 0.73 
 -12 12 2 1.35 1.07 
 -11 -12 2 -0.54 1.02 
 -11 -12 2 1.81 0.99 
 -11 -12 2 0.47 0.64 
 11 -12 -2 -0.21 0.85 
 -11 12 2 0.68 0.94 
 10 -12 -2 -0.2 0.72 
 -10 -12 2 1.25 0.8 
 -10 -12 2 -0.53 0.85 
 -10 -12 2 0.58 0.57 
 10 -12 -2 -1.15 0.71 
 -10 12 2 1.49 0.92 
 10 12 -2 -0.02 0.83 
 9 -12 -2 16.87 1.48 
 -9 -12 2 19.58 1.19 
 -9 -12 2 17.58 1.72 
 9 -12 -2 16.63 1.55 
 -9 -12 2 20.45 1.56 
 9 12 -2 18.85 1.72 
 -9 12 2 20.92 1.65 
 -8 -12 2 1.98 0.49 
 -8 -12 2 3.85 0.96 
 -8 -12 2 3.55 0.81 
 8 -12 -2 1.58 0.79 
 8 -12 -2 1.91 0.79 
 -8 12 2 2.18 0.85 
 8 12 -2 3.35 0.93 
 -7 -12 2 8.66 1.14 
 -7 -12 2 7.96 0.81 
 -7 -12 2 10.14 1.07 
 -7 -12 2 7.95 0.63 
 7 -12 -2 7.78 1.12 
 7 -12 -2 8.13 1 
 7 12 -2 8.14 1.08 
 -7 12 2 8.19 1.01 
 6 -12 -2 0.46 0.6 
 6 -12 -2 -0.32 0.57 
 -6 -12 2 0.35 0.51 
 -6 -12 2 0.01 0.66 
 -6 -12 2 0.25 0.47 
 -6 -12 2 0.16 0.28 
 -6 12 2 0.43 0.55 
 6 12 -2 1.03 0.68 
 5 -12 -2 4.52 0.78 
 -5 -12 2 4.6 0.35 
 -5 -12 2 5.38 0.76 
 -5 -12 2 4.13 0.69 
 5 -12 -2 4.43 0.87 
 -5 -12 2 5.07 0.88 
 -5 12 2 4.57 0.73 
 5 12 -2 3.74 0.83 
 -4 -12 2 1.52 0.5 
 -4 -12 2 1.55 0.63 
 -4 -12 2 1.25 0.52 
 4 -12 -2 1.67 0.61 
 4 12 -2 1.18 0.63 
 -4 12 2 2.12 0.54 
 3 -12 -2 1.08 0.53 
 -3 -12 2 0.43 0.41 
 -3 -12 2 0.35 0.49 
 3 12 -2 0.79 0.58 
 -3 12 2 1.07 0.44 
 -2 -12 2 1.16 0.42 
 2 -12 -2 -0.13 0.5 
 -2 -12 2 -0.2 0.39 
 2 12 -2 -0.31 0.49 
 -2 12 2 0.33 0.56 
 -2 12 2 -0.14 0.34 
 -1 -12 2 1.39 0.47 
 -1 -12 2 1 0.54 
 1 -12 -2 1.46 0.34 
 1 -12 -2 1.47 0.58 
 -1 12 2 1.64 0.62 
 1 12 -2 1.26 0.63 
 -1 12 2 1.54 0.41 
 0 -12 -2 0.36 0.27 
 0 -12 -2 0.12 0.35 
 0 -12 -2 1.15 0.56 
 0 -12 2 0.14 0.6 
 0 -12 2 0.27 0.39 
 0 12 2 1.36 0.59 
 0 12 2 0.12 0.31 
 0 12 -2 0.24 0.57 
 1 -12 2 42.12 1.65 
 1 -12 2 43.89 1.61 
 -1 -12 -2 40.64 1.6 
 -1 -12 -2 40.41 1.86 
 -1 -12 -2 42.57 1.46 
 1 -12 2 41.71 1.97 
 -1 -12 -2 42.13 1.45 
 -1 12 -2 37.77 1.9 
 1 12 2 43.85 1.86 
 2 -12 2 10.58 0.8 
 -2 -12 -2 14.32 1.19 
 2 -12 2 11.68 1.19 
 -2 -12 -2 12.31 0.72 
 2 -12 2 12.48 0.9 
 -2 -12 -2 11.44 0.78 
 2 12 2 12.81 1.02 
 -2 12 -2 10.85 0.77 
 -2 12 -2 11.25 1.11 
 3 -12 2 24.63 1.59 
 -3 -12 -2 24.99 1.13 
 -3 -12 -2 24.74 1.09 
 -3 -12 -2 24.23 1.48 
 3 -12 2 24.6 1.16 
 3 -12 2 26.58 1.32 
 3 12 2 21.83 1.31 
 -3 12 -2 21.51 1.49 
 -3 12 -2 26.45 1.2 
 4 -12 2 0.6 0.4 
 -4 -12 -2 0.11 0.36 
 -4 -12 -2 -0.09 0.63 
 4 -12 2 0.54 0.62 
 4 -12 2 -0.06 0.5 
 -4 -12 -2 -0.29 0.31 
 4 12 2 -0.55 0.44 
 -4 12 -2 0.67 0.68 
 -5 -12 -2 4.93 0.6 
 5 -12 2 5.3 0.62 
 -5 -12 -2 3.69 0.85 
 -5 -12 -2 4.29 0.57 
 5 -12 2 3.25 0.79 
 5 12 2 4.71 0.77 
 -5 12 -2 3.16 0.9 
 -6 -12 -2 2 0.51 
 -6 -12 -2 1.37 0.47 
 -6 -12 -2 1.42 0.43 
 6 -12 2 1.41 0.51 
 -6 -12 -2 0.39 0.77 
 6 -12 2 1.57 0.78 
 -6 12 -2 1.05 0.73 
 6 12 2 1.85 0.63 
 -7 -12 -2 -0.7 0.73 
 -7 -12 -2 0.28 0.5 
 7 -12 2 0.53 0.5 
 7 -12 2 0.03 0.76 
 -7 -12 -2 0.26 0.46 
 7 12 2 0.42 0.59 
 -7 12 -2 0.6 0.75 
 8 -12 2 1.61 0.85 
 -8 -12 -2 2.89 0.66 
 8 -12 2 4.19 0.74 
 -8 -12 -2 2.64 0.89 
 -8 -12 -2 3.6 0.72 
 -8 12 -2 3.66 0.92 
 8 12 2 1.07 0.71 
 -9 -12 -2 2.89 0.79 
 -9 -12 -2 2.88 0.71 
 -9 -12 -2 2.79 1.05 
 9 -12 2 1.09 0.89 
 -9 12 -2 2.81 1.04 
 9 12 2 3.34 0.85 
 -10 -12 -2 3.1 0.9 
 -10 -12 -2 3.9 0.8 
 -10 -12 -2 4.5 1.21 
 10 -12 2 3.33 1.04 
 -10 12 -2 4.65 1.09 
 -11 -12 -2 5.69 0.97 
 11 -12 2 5.38 1.15 
 -11 -12 -2 5.28 1.34 
 -11 -12 -2 4.82 1.06 
 -11 12 -2 4.26 1.27 
 -12 -12 -2 -0.29 0.74 
 -12 -12 -2 1.1 1.21 
 -12 12 -2 0.27 1.14 
 -11 -13 2 12.13 1.11 
 -11 -13 2 13.47 1.73 
 11 -13 -2 11.04 1.4 
 -11 -13 2 11.07 1.48 
 -11 13 2 11.66 1.54 
 10 -13 -2 0.38 0.84 
 -10 -13 2 3.33 0.93 
 -10 -13 2 1.43 0.61 
 -10 -13 2 2.2 1.09 
 10 -13 -2 3.28 0.96 
 -10 13 2 1.6 0.98 
 10 13 -2 1.28 0.98 
 9 -13 -2 1.75 0.87 
 9 -13 -2 2.06 0.87 
 -9 -13 2 2.15 0.81 
 -9 -13 2 1.36 0.52 
 -9 -13 2 1.14 1.01 
 9 13 -2 2.1 0.9 
 -9 13 2 0.64 0.8 
 8 -13 -2 2.21 0.9 
 -8 -13 2 3.27 1.01 
 -8 -13 2 3.95 0.85 
 -8 -13 2 1.92 0.48 
 8 -13 -2 2.55 0.85 
 8 13 -2 3.12 0.97 
 -8 13 2 2.1 0.85 
 -7 -13 2 11.05 1.12 
 7 -13 -2 9.79 1.25 
 7 -13 -2 12.09 1.17 
 -7 -13 2 9.45 1.23 
 -7 -13 2 11.24 0.99 
 -7 -13 2 10.57 0.72 
 -7 13 2 9.33 1.12 
 7 13 -2 10.5 1.23 
 -6 -13 2 -0.08 0.5 
 6 -13 -2 0.17 0.69 
 -6 -13 2 0.26 0.26 
 -6 -13 2 -0.06 0.73 
 6 -13 -2 0.41 0.6 
 -6 -13 2 0.35 0.5 
 -6 13 2 0.29 0.58 
 6 13 -2 0.51 0.65 
 -5 -13 2 0.15 0.47 
 -5 -13 2 0.1 0.17 
 -5 -13 2 0.16 0.53 
 5 -13 -2 0.71 0.65 
 -5 -13 2 -0.14 0.66 
 5 -13 -2 0.25 0.61 
 -5 13 2 -0.28 0.5 
 5 13 -2 0.27 0.62 
 4 -13 -2 10.49 1.06 
 -4 -13 2 13.67 1.24 
 -4 -13 2 13.22 1.05 
 -4 -13 2 11.82 0.96 
 4 13 -2 14.2 1.29 
 -3 -13 2 0.05 0.44 
 -3 -13 2 -0.48 0.46 
 3 -13 -2 0.56 0.57 
 3 13 -2 -0.25 0.53 
 -3 13 2 -0.24 0.59 
 2 -13 -2 5.21 0.79 
 -2 -13 2 5.29 0.65 
 -2 -13 2 4.83 0.72 
 -2 -13 2 3.62 0.75 
 -2 13 2 4.6 0.72 
 2 13 -2 4.4 0.8 
 -2 13 2 4.88 0.84 
 1 -13 -2 69.17 2.3 
 -1 -13 2 73.09 2.56 
 -1 -13 2 69.01 2.77 
 1 -13 -2 70.3 2.65 
 1 13 -2 66.79 2.76 
 -1 13 2 72.95 2.41 
 -1 13 2 69.41 2.71 
 0 -13 2 -0.24 0.37 
 0 -13 2 -0.26 0.6 
 0 -13 -2 0.49 0.55 
 0 -13 -2 0.15 0.39 
 0 -13 -2 -0.13 0.26 
 0 13 -2 0.31 0.54 
 0 13 2 0.43 0.59 
 -1 -13 -2 9.32 1.01 
 -1 -13 -2 8.62 0.73 
 1 -13 2 9.08 0.8 
 -1 -13 -2 8.98 0.61 
 1 -13 2 8.33 1.06 
 -1 -13 -2 8.58 0.65 
 -1 13 -2 9.64 1.16 
 1 13 2 8.43 0.96 
 -2 -13 -2 5.3 0.59 
 2 -13 2 5.97 0.67 
 2 -13 2 6.57 0.97 
 -2 -13 -2 4.99 0.85 
 -2 -13 -2 6.97 0.6 
 2 -13 2 6.68 0.74 
 2 13 2 8.37 0.94 
 -2 13 -2 6.2 0.99 
 3 -13 2 6.92 0.78 
 3 -13 2 7.73 1.08 
 -3 -13 -2 5.66 0.9 
 -3 -13 -2 6.41 0.62 
 3 -13 2 6.6 0.7 
 -3 -13 -2 6.79 0.64 
 3 13 2 6.42 0.85 
 -3 13 -2 5.97 0.95 
 -4 -13 -2 0.65 0.68 
 -4 -13 -2 0.83 0.41 
 4 -13 2 0.46 0.52 
 4 -13 2 1.53 0.49 
 4 -13 2 0.88 0.77 
 -4 -13 -2 0.77 0.39 
 4 13 2 2.38 0.65 
 -4 13 -2 0.48 0.7 
 5 -13 2 15.78 1.47 
 -5 -13 -2 16.24 1.01 
 5 -13 2 16.9 1.05 
 -5 -13 -2 18.35 1.55 
 -5 -13 -2 19.22 1.03 
 5 13 2 15.51 1.21 
 -5 13 -2 15.61 1.49 
 -6 -13 -2 6.11 0.73 
 -6 -13 -2 7.16 0.7 
 6 -13 2 7.86 0.82 
 -6 -13 -2 7.26 0.75 
 6 -13 2 7.08 1.17 
 -6 -13 -2 6.6 1.09 
 6 13 2 7.26 0.94 
 -6 13 -2 6.02 1.08 
 -7 -13 -2 0.26 0.47 
 -7 -13 -2 0.2 0.86 
 -7 -13 -2 -0.9 0.39 
 7 -13 2 0.19 0.51 
 7 -13 2 -0.68 0.69 
 -7 13 -2 0.93 0.76 
 7 13 2 -0.41 0.56 
 -8 -13 -2 3.97 0.73 
 -8 -13 -2 5.23 0.78 
 -8 -13 -2 4.58 1.17 
 8 -13 2 5.31 1.08 
 8 -13 2 4.37 0.96 
 -8 13 -2 4.98 1.12 
 8 13 2 6.2 1.03 
 9 -13 2 0.15 0.85 
 -9 -13 -2 1.5 0.65 
 -9 -13 -2 1.85 0.98 
 -9 -13 -2 2.36 0.73 
 -9 13 -2 1.04 0.94 
 9 13 2 0.15 0.7 
 -10 -13 -2 -0.03 0.63 
 -10 -13 -2 1.46 1.34 
 -10 -13 -2 0.4 0.97 
 10 -13 2 1.53 0.94 
 -10 13 -2 -0.33 0.86 
 11 -13 2 2.51 1 
 -11 -13 -2 1.07 0.74 
 -11 -13 -2 1.36 1.15 
 -11 13 -2 1.07 1.09 
 -11 -14 2 0.01 0.6 
 -11 -14 2 1.66 0.95 
 11 -14 -2 1.37 0.96 
 -11 -14 2 2.66 1.19 
 -11 14 2 -0.46 0.92 
 10 -14 -2 3.09 1.05 
 -10 -14 2 3.83 0.98 
 -10 -14 2 0.13 1.05 
 -10 -14 2 3.9 0.68 
 10 -14 -2 3.53 1.04 
 -10 14 2 4.12 1.12 
 10 14 -2 4.55 1.16 
 -9 -14 2 1.8 0.53 
 -9 -14 2 1.92 0.99 
 -9 -14 2 3.02 0.86 
 9 -14 -2 1.66 0.97 
 9 -14 -2 1.2 0.84 
 -9 14 2 2.35 0.93 
 9 14 -2 2.1 0.99 
 -8 -14 2 0.2 0.39 
 -8 -14 2 0.33 0.93 
 -8 -14 2 0.63 0.63 
 8 -14 -2 0.49 0.72 
 8 -14 -2 -1.41 0.73 
 8 14 -2 0.3 0.72 
 -8 14 2 0.97 0.76 
 7 -14 -2 0.31 0.73 
 -7 -14 2 0.95 0.91 
 -7 -14 2 1.02 0.34 
 7 -14 -2 1.02 0.72 
 -7 -14 2 1.29 0.65 
 -7 -14 2 0.32 0.56 
 7 14 -2 1.22 0.78 
 -7 14 2 0.67 0.7 
 6 -14 -2 2.48 0.83 
 -6 -14 2 2.16 0.67 
 -6 -14 2 1.32 0.83 
 6 -14 -2 2.53 0.75 
 -6 -14 2 3.03 0.31 
 -6 -14 2 2.27 0.71 
 6 14 -2 2.85 0.85 
 -6 14 2 3.35 0.79 
 -5 -14 2 0.75 0.59 
 -5 -14 2 -0.35 0.48 
 5 -14 -2 1 0.64 
 5 -14 -2 0.83 0.76 
 -5 -14 2 0.49 0.73 
 5 14 -2 -1.34 0.57 
 -4 -14 2 4.82 0.86 
 4 -14 -2 4.2 0.81 
 -4 -14 2 3.96 0.74 
 -4 -14 2 3.03 0.67 
 4 -14 -2 2.45 0.8 
 4 14 -2 3.24 0.82 
 -4 14 2 2.44 0.81 
 3 -14 -2 8.23 0.96 
 -3 -14 2 7.13 0.84 
 -3 -14 2 6.27 0.9 
 -3 -14 2 7.38 0.93 
 3 14 -2 5.8 0.98 
 -3 14 2 7.53 1.06 
 -2 -14 2 6.65 0.83 
 -2 -14 2 6.03 0.9 
 -2 -14 2 8.44 0.85 
 2 -14 -2 6.5 0.9 
 2 14 -2 7 1.01 
 -2 14 2 9.18 1.12 
 -1 -14 2 4.42 0.7 
 1 -14 -2 5.75 0.86 
 -1 -14 2 4.76 0.9 
 1 14 -2 4.58 0.9 
 -1 14 2 5.2 0.89 
 0 -14 -2 11.29 1.12 
 0 -14 2 9.61 1.21 
 0 -14 2 10.14 0.92 
 0 14 -2 8.77 1.1 
 0 14 2 10.12 1.14 
 -1 -14 -2 2.24 0.53 
 -1 -14 -2 2.11 0.43 
 -1 -14 -2 2.11 0.71 
 1 -14 2 1.8 0.51 
 1 -14 2 3.27 0.79 
 -1 14 -2 2.48 0.8 
 1 14 2 1.84 0.71 
 -2 -14 -2 5.37 0.91 
 -2 -14 -2 4.96 0.6 
 2 -14 2 7.23 0.75 
 -2 -14 -2 5.5 0.57 
 2 -14 2 4.14 0.84 
 -2 14 -2 5.9 1.06 
 2 14 2 6.35 0.89 
 -3 -14 -2 7.93 0.69 
 -3 -14 -2 5.83 0.96 
 3 -14 2 6.7 0.72 
 3 -14 2 5.72 0.75 
 -3 -14 -2 6.27 0.63 
 3 -14 2 6.18 1.07 
 -3 14 -2 5.64 1.01 
 3 14 2 5.22 0.84 
 -4 -14 -2 5.59 0.62 
 -4 -14 -2 4.19 0.88 
 4 -14 2 5.94 1.01 
 -4 -14 -2 4.99 0.61 
 4 -14 2 5 0.68 
 -4 14 -2 3.56 0.87 
 4 14 2 4.48 0.81 
 5 -14 2 0.13 0.48 
 -5 -14 -2 -0.52 0.37 
 5 -14 2 -0.29 0.75 
 -5 -14 -2 0.3 0.42 
 -5 -14 -2 -0.35 0.66 
 5 14 2 0.41 0.58 
 -5 14 -2 0.7 0.81 
 -6 -14 -2 -0.42 0.44 
 -6 -14 -2 0.67 0.46 
 6 -14 2 0.59 0.54 
 6 -14 2 0.41 0.86 
 -6 -14 -2 0.65 0.89 
 6 14 2 -0.28 0.54 
 -6 14 -2 1.15 0.97 
 -7 -14 -2 -0.07 0.82 
 -7 -14 -2 0.29 0.47 
 -7 -14 -2 -0.08 0.48 
 7 -14 2 0 0.84 
 7 -14 2 -0.02 0.52 
 7 14 2 -0.87 0.55 
 -7 14 -2 0.41 0.92 
 -8 -14 -2 4.22 0.71 
 8 -14 2 3.66 1.14 
 -8 -14 -2 4.7 1.1 
 -8 14 -2 3.52 0.95 
 8 14 2 4.24 0.95 
 -9 -14 -2 1.09 0.64 
 -9 -14 -2 0.63 1.01 
 9 -14 2 -1.09 0.82 
 -9 14 -2 -0.28 0.87 
 10 -14 2 2.51 1.02 
 -10 -14 -2 2.99 1.13 
 -10 -14 -2 1.54 0.74 
 -10 14 -2 2.65 1.12 
 -11 -14 -2 6.66 1.45 
 -11 -14 -2 3.34 0.9 
 11 -14 2 4.2 1.21 
 -11 14 -2 4.38 1.34 
 10 -15 -2 5.21 1.22 
 -10 -15 2 6.37 1.41 
 -10 -15 2 4.32 0.68 
 -10 -15 2 5.05 1.03 
 10 -15 -2 6.25 1.13 
 10 15 -2 2.46 1.07 
 -10 15 2 6.37 1.21 
 9 -15 -2 0.62 0.84 
 -9 -15 2 1.09 0.75 
 -9 -15 2 0.77 0.47 
 9 -15 -2 1.24 0.93 
 -9 -15 2 -0.66 1 
 9 15 -2 0.72 0.92 
 -9 15 2 0.89 0.85 
 -8 -15 2 0.7 0.98 
 8 -15 -2 1 0.91 
 -8 -15 2 0.93 0.69 
 -8 -15 2 1.11 0.38 
 8 -15 -2 1.94 0.86 
 -8 15 2 1.63 0.83 
 8 15 -2 -0.53 0.73 
 7 -15 -2 -0.36 0.7 
 -7 -15 2 1.09 0.28 
 -7 -15 2 -0.37 0.57 
 7 -15 -2 1.18 0.91 
 -7 -15 2 0.77 0.9 
 7 15 -2 1.7 0.84 
 -7 15 2 0.66 0.74 
 -6 -15 2 -1.03 0.75 
 6 -15 -2 1.09 0.72 
 -6 -15 2 -0.09 0.53 
 6 -15 -2 -0.49 0.72 
 -6 -15 2 0.25 0.59 
 -6 15 2 0.46 0.64 
 6 15 -2 0.79 0.76 
 -5 -15 2 0.31 0.74 
 5 -15 -2 -0.5 0.63 
 5 -15 -2 1.43 0.88 
 -5 -15 2 0.69 0.62 
 -5 -15 2 0.38 0.53 
 5 15 -2 0.63 0.74 
 -4 -15 2 9.82 1.05 
 4 -15 -2 7.92 1.15 
 -4 -15 2 11.04 1.17 
 -4 -15 2 9.94 1.03 
 4 -15 -2 10.31 1.11 
 -4 15 2 9.46 1.27 
 4 15 -2 8.98 1.2 
 -3 -15 2 3.64 0.78 
 -3 -15 2 1.16 0.58 
 -3 -15 2 2.24 0.67 
 3 -15 -2 2.78 0.77 
 3 15 -2 2.85 0.83 
 -3 15 2 1.79 0.74 
 -2 -15 2 24.63 1.36 
 2 -15 -2 24.06 1.51 
 -2 -15 2 22.37 1.61 
 -2 -15 2 24.18 1.45 
 2 15 -2 20.13 1.53 
 -2 15 2 22.16 1.58 
 1 -15 -2 28.96 1.59 
 -1 -15 2 25.67 1.43 
 -1 -15 2 25.68 1.64 
 -1 15 2 23.9 1.58 
 1 15 -2 24.62 1.68 
 0 -15 2 4.77 1.02 
 0 -15 2 3.72 0.67 
 0 -15 -2 4.33 0.85 
 0 15 -2 3.37 0.9 
 0 15 2 4.76 0.89 
 -1 -15 -2 5.93 0.6 
 -1 -15 -2 5.46 0.93 
 -1 -15 -2 4.29 0.63 
 1 -15 2 6.44 0.77 
 1 -15 2 4.49 0.92 
 -1 15 -2 5.44 1.03 
 1 15 2 5.97 0.96 
 2 -15 2 0.48 0.46 
 -2 -15 -2 -0.1 0.64 
 -2 -15 -2 -0.14 0.41 
 -2 -15 -2 0.54 0.38 
 2 -15 2 -0.32 0.7 
 -2 15 -2 0.18 0.79 
 2 15 2 -0.27 0.58 
 -3 -15 -2 1.42 0.46 
 -3 -15 -2 2.27 0.51 
 -3 -15 -2 2.21 0.8 
 3 -15 2 2.06 0.9 
 3 -15 2 3.15 0.61 
 3 15 2 1.92 0.71 
 -3 15 -2 3.8 0.95 
 -4 -15 -2 2.41 0.51 
 4 -15 2 1.29 0.79 
 4 -15 2 2.83 0.62 
 -4 -15 -2 2.6 0.82 
 -4 15 -2 0.79 0.83 
 4 15 2 1.19 0.7 
 -5 -15 -2 6.27 0.69 
 -5 -15 -2 6.59 1.12 
 5 -15 2 5.7 1.07 
 5 -15 2 6.87 0.8 
 5 15 2 5.93 0.92 
 -5 15 -2 4.23 1.09 
 6 -15 2 4.93 1.07 
 -6 -15 -2 6.32 1.16 
 6 -15 2 5.51 0.79 
 -6 -15 -2 7.28 0.75 
 -6 15 -2 4.47 1.15 
 6 15 2 6.21 0.97 
 7 -15 2 1.35 0.98 
 -7 -15 -2 0.69 0.54 
 -7 -15 -2 0.72 0.88 
 -7 15 -2 0.38 0.95 
 7 15 2 1.36 0.7 
 -8 -15 -2 28.23 2.18 
 -8 -15 -2 24.42 1.44 
 8 -15 2 19.54 1.95 
 8 15 2 25.8 1.67 
 -8 15 -2 25.42 2.27 
 -9 -15 -2 -0.03 0.59 
 9 -15 2 0.69 0.99 
 -9 -15 -2 1.27 1.15 
 -9 15 -2 0.39 0.98 
 -10 -15 -2 2.81 0.79 
 10 -15 2 2.89 1.1 
 -10 -15 -2 2.29 1.22 
 -10 15 -2 2.18 1.11 
 -10 -16 2 0.92 0.48 
 -10 -16 2 0.41 1.1 
 10 -16 -2 -0.14 0.91 
 -10 16 2 -0.55 0.82 
 10 16 -2 0.23 1.04 
 -9 -16 2 1.13 1.07 
 -9 -16 2 0.02 0.72 
 9 -16 -2 -0.6 0.79 
 9 -16 -2 -0.83 0.92 
 -9 -16 2 0.35 0.39 
 9 16 -2 -0.96 0.87 
 -9 16 2 1.03 0.88 
 -8 -16 2 0.75 0.69 
 8 -16 -2 1.06 1.02 
 -8 -16 2 1.38 0.33 
 -8 -16 2 1.58 1.03 
 8 -16 -2 2.48 0.9 
 -8 -16 2 3.1 0.87 
 -8 16 2 1.35 0.86 
 8 16 -2 1.79 0.9 
 -7 -16 2 0.26 0.94 
 7 -16 -2 -0.59 0.73 
 7 -16 -2 0.27 0.78 
 -7 -16 2 1.56 0.72 
 -7 -16 2 -0.64 0.58 
 -7 16 2 0.79 0.7 
 7 16 -2 -0.73 0.75 
 -6 -16 2 20.02 1.43 
 -6 -16 2 20.51 1.74 
 6 -16 -2 19.09 1.8 
 -6 -16 2 23.68 1.5 
 -6 -16 2 22.19 1.55 
 6 -16 -2 21 1.53 
 6 16 -2 17.04 1.66 
 5 -16 -2 0.82 0.82 
 -5 -16 2 1.04 0.79 
 -5 -16 2 1.4 0.7 
 -5 -16 2 1.06 0.69 
 5 -16 -2 0.98 0.73 
 -5 -16 2 0.38 0.59 
 -5 16 2 1.13 0.89 
 5 16 -2 0.55 0.78 
 4 -16 -2 4.61 1.1 
 4 -16 -2 4.07 0.88 
 -4 -16 2 3.45 0.74 
 -4 -16 2 3.3 0.79 
 -4 -16 2 6.29 0.96 
 -4 -16 2 3.14 0.84 
 4 16 -2 2.25 0.85 
 -4 16 2 4.77 1.09 
 -3 -16 2 5.39 0.95 
 -3 -16 2 4.9 0.89 
 3 -16 -2 6.59 0.96 
 -3 -16 2 6.69 0.9 
 -3 16 2 5.94 1.08 
 3 16 -2 4.43 0.98 
 -2 -16 2 3.79 0.95 
 -2 -16 2 3.63 0.78 
 -2 -16 2 3.48 0.71 
 2 -16 -2 2.93 0.83 
 2 16 -2 2.32 0.88 
 -2 16 2 4.09 0.95 
 1 -16 -2 0.67 0.7 
 -1 -16 2 -1.26 0.69 
 -1 -16 2 -0.06 0.5 
 1 16 -2 0.6 0.73 
 -1 16 2 0.48 0.7 
 0 -16 2 4.2 0.94 
 0 -16 -2 7.11 1.03 
 0 -16 2 6.61 0.83 
 0 16 -2 7.44 1.14 
 0 16 2 5.81 1.01 
 1 -16 2 3.6 0.9 
 1 -16 2 4.41 0.72 
 -1 -16 -2 4.05 0.9 
 1 16 2 3.61 0.88 
 -1 16 -2 4.66 1.08 
 -2 -16 -2 -0.06 0.42 
 2 -16 2 0.04 0.5 
 -2 -16 -2 0.06 0.74 
 2 -16 2 0.28 0.78 
 2 16 2 0.28 0.64 
 -2 16 -2 -0.25 0.84 
 -3 -16 -2 1.43 0.85 
 3 -16 2 1.4 0.53 
 -3 -16 -2 1.31 0.48 
 3 -16 2 2.32 0.87 
 -3 16 -2 -0.55 0.8 
 3 16 2 0.76 0.65 
 -4 -16 -2 2.35 0.89 
 4 -16 2 2.64 0.97 
 4 -16 2 3.77 0.7 
 -4 -16 -2 2.92 0.56 
 4 16 2 2.97 0.81 
 -4 16 -2 2.96 1.07 
 5 -16 2 -0.34 0.81 
 -5 -16 -2 -0.17 0.85 
 -5 -16 -2 0.46 0.44 
 5 -16 2 0.49 0.55 
 5 16 2 0.42 0.64 
 -5 16 -2 -0.22 0.9 
 -6 -16 -2 0.65 0.49 
 -6 -16 -2 1.24 0.86 
 6 -16 2 -1.78 0.8 
 -6 16 -2 0.69 0.89 
 6 16 2 0.29 0.67 
 -7 -16 -2 0.16 0.95 
 7 -16 2 -0.66 0.89 
 -7 -16 -2 1.22 0.53 
 -7 16 -2 1.13 1.1 
 7 16 2 1.48 0.76 
 8 -16 2 0.75 1.01 
 -8 -16 -2 -0.44 0.54 
 -8 -16 -2 0.34 1 
 -8 16 -2 0.67 1.07 
 -9 -16 -2 2.9 1.24 
 9 -16 2 1.59 1.08 
 -9 -16 -2 1.96 0.68 
 -9 16 -2 0.5 1.16 
 9 -17 -2 0.81 1.07 
 -9 -17 2 0.8 1.14 
 -9 -17 2 0.59 0.32 
 9 17 -2 -0.84 0.79 
 -8 -17 2 5.43 1.31 
 8 -17 -2 4.01 1.09 
 8 -17 -2 3.65 1.19 
 8 17 -2 2.04 1 
 7 -17 -2 -0.6 0.76 
 -7 -17 2 1.14 0.73 
 7 -17 -2 0.09 0.93 
 -7 -17 2 -0.24 0.91 
 7 17 -2 0.85 0.85 
 -6 -17 2 -0.11 0.66 
 6 -17 -2 1.11 0.85 
 -6 -17 2 0.74 0.63 
 6 -17 -2 -0.08 0.8 
 -6 -17 2 -0.07 0.88 
 -6 17 2 1.38 1 
 6 17 -2 0.38 0.82 
 5 -17 -2 7.71 1.09 
 5 -17 -2 6.75 1.3 
 -5 -17 2 7.52 1.18 
 -5 -17 2 6.75 0.98 
 -5 -17 2 5.84 1.08 
 -5 -17 2 7.7 1.06 
 -5 17 2 8.02 1.38 
 5 17 -2 6.24 1.16 
 4 -17 -2 22.26 1.99 
 -4 -17 2 19.28 1.41 
 -4 -17 2 22.92 1.52 
 -4 -17 2 20.71 1.62 
 -4 -17 2 25.4 1.69 
 4 -17 -2 17.68 1.52 
 4 17 -2 22.38 1.71 
 -4 17 2 22.78 1.8 
 -3 -17 2 3.87 0.94 
 -3 -17 2 4.55 0.87 
 -3 -17 2 5.5 0.84 
 3 -17 -2 4.73 0.94 
 3 -17 -2 3.11 0.96 
 -3 17 2 4.78 1.07 
 3 17 -2 6.21 1.11 
 -2 -17 2 2.32 0.92 
 -2 -17 2 4.58 0.85 
 -2 -17 2 3.63 0.76 
 2 -17 -2 2.92 0.9 
 -2 17 2 3.79 0.99 
 2 17 -2 2.8 0.92 
 1 -17 -2 1.72 0.77 
 -1 -17 2 1.89 0.92 
 -1 -17 2 0.71 0.6 
 1 17 -2 2.33 0.91 
 -1 17 2 0.8 0.77 
 0 -17 -2 1.1 0.76 
 0 -17 2 1.66 0.93 
 0 -17 2 1.96 0.63 
 0 17 -2 2.93 0.94 
 0 17 2 1.56 0.83 
 -1 -17 -2 0.3 0.75 
 1 -17 2 -0.24 0.8 
 1 -17 2 0.03 0.5 
 -1 17 -2 0.47 0.76 
 1 17 2 0.45 0.78 
 -2 -17 -2 0.35 0.49 
 -2 -17 -2 0.69 0.78 
 2 -17 2 -0.06 0.82 
 2 -17 2 1.2 0.59 
 2 17 2 0.28 0.72 
 -2 17 -2 1.34 0.92 
 -3 -17 -2 2.82 0.6 
 3 -17 2 3.79 1.01 
 3 -17 2 5.02 0.79 
 -3 -17 -2 6.08 1.14 
 -3 17 -2 6.43 1.22 
 3 17 2 3.13 0.86 
 -4 -17 -2 0.81 0.87 
 -4 -17 -2 0.89 0.48 
 4 -17 2 1.7 0.97 
 4 -17 2 3.28 0.76 
 4 17 2 1.32 0.81 
 -4 17 -2 1.2 1.02 
 5 -17 2 1.12 0.89 
 -5 -17 -2 -0.69 0.88 
 -5 -17 -2 -0.01 0.45 
 -5 17 -2 -1.01 0.91 
 5 17 2 -0.96 0.64 
 6 -17 2 14.18 1.74 
 -6 -17 -2 14.76 1.09 
 -6 -17 -2 12.99 1.56 
 6 17 2 14.44 1.38 
 -6 17 -2 13.22 1.64 
 -7 -17 -2 5.73 1.29 
 7 -17 2 5.58 1.35 
 -7 -17 -2 5.04 0.72 
 -7 17 -2 4.52 1.36 
 7 17 2 3.11 0.89 
 8 -17 2 5.76 1.37 
 -8 -17 -2 5.2 1.24 
 -8 -17 -2 6.39 0.81 
 -8 17 -2 3.19 1.24 
 -9 -17 -2 2.79 1.24 
 9 -17 2 5.36 1.38 
 -9 17 -2 2.87 1.36 
 -8 -18 2 2.66 1.12 
 8 -18 -2 1.64 1.1 
 8 18 -2 0.18 0.91 
 -8 18 2 0.27 1.09 
 7 -18 -2 2.5 0.95 
 7 -18 -2 1.14 1.03 
 -7 -18 2 2.43 1.13 
 -7 -18 2 1.94 0.84 
 -7 18 2 1.54 1.23 
 7 18 -2 2.02 0.99 
 -6 -18 2 15.63 1.57 
 -6 -18 2 16.39 1.7 
 6 -18 -2 14.55 1.81 
 6 -18 -2 12.97 1.38 
 6 18 -2 14.1 1.61 
 -6 18 2 12.84 1.68 
 -5 -18 2 0.48 0.76 
 5 -18 -2 3.55 1.16 
 -5 -18 2 1.37 0.79 
 5 -18 -2 -0.76 0.78 
 -5 -18 2 2.53 0.89 
 -5 18 2 0.94 0.99 
 5 18 -2 1.68 0.97 
 4 -18 -2 2.61 0.86 
 -4 -18 2 0.14 0.64 
 -4 -18 2 1.3 0.72 
 4 -18 -2 0.53 1.01 
 -4 -18 2 2.11 0.84 
 4 18 -2 1.29 0.9 
 -4 18 2 0.84 1 
 -3 -18 2 1.77 0.74 
 -3 -18 2 0.71 0.8 
 -3 -18 2 0.09 0.61 
 3 -18 -2 0.45 0.77 
 3 -18 -2 0.56 0.94 
 3 18 -2 1.06 0.88 
 -3 18 2 0.3 0.87 
 -2 -18 2 17.9 1.34 
 -2 -18 2 16.7 1.73 
 -2 -18 2 16.36 1.4 
 2 -18 -2 15.59 1.48 
 -2 18 2 14.85 1.62 
 2 18 -2 12.94 1.53 
 -1 -18 2 0.34 0.79 
 -1 -18 2 1.24 0.7 
 1 -18 -2 2.7 0.89 
 1 18 -2 1.02 0.91 
 -1 18 2 1.21 0.84 
 0 -18 -2 1.51 0.84 
 0 -18 2 1.06 0.65 
 0 -18 2 1.61 0.88 
 0 18 2 1.21 0.91 
 0 18 -2 0.14 0.88 
 1 -18 2 5.71 0.85 
 -1 -18 -2 4.43 1.02 
 1 -18 2 5.45 1.2 
 -1 18 -2 6.1 1.24 
 1 18 2 3.8 1.04 
 -2 -18 -2 0.87 0.84 
 2 -18 2 1.71 1.01 
 2 -18 2 0.87 0.6 
 -2 18 -2 0.36 0.91 
 2 18 2 -1.4 0.67 
 -3 -18 -2 7.56 0.79 
 3 -18 2 8.96 1.01 
 3 -18 2 6.64 1.27 
 -3 -18 -2 10.33 1.35 
 3 18 2 6.57 1.11 
 -3 18 -2 8.7 1.49 
 4 -18 2 1.47 1.04 
 -4 -18 -2 1.07 0.52 
 -4 -18 -2 1.9 1 
 4 18 2 -0.09 0.73 
 -4 18 -2 0.5 0.95 
 -5 -18 -2 4.02 0.63 
 -5 -18 -2 4.41 1.2 
 5 -18 2 3.79 1.22 
 -5 18 -2 3.8 1.21 
 5 18 2 4.32 1.01 
 -6 -18 -2 15.02 1.73 
 6 -18 2 10.14 1.55 
 -6 -18 -2 15.07 1.05 
 -6 18 -2 10.12 1.65 
 6 18 2 11.82 1.34 
 7 -18 2 0.4 1.07 
 -7 -18 -2 -0.23 0.98 
 -7 -18 -2 0.07 0.51 
 -7 18 -2 -0.29 1 
 -8 -18 -2 1.87 1.11 
 8 -18 2 0.41 1.12 
 -8 -18 -2 1.67 0.6 
 -8 18 -2 1.27 1.1 
 -7 -19 2 -0.27 1.03 
 -7 -19 2 0.25 0.68 
 7 -19 -2 0.71 1.1 
 -7 19 2 -0.78 1.1 
 7 19 -2 -1.07 0.87 
 -6 -19 2 0.34 0.78 
 6 -19 -2 -1.04 0.84 
 -6 -19 2 0.35 0.96 
 6 -19 -2 -0.77 0.8 
 6 19 -2 1.74 0.99 
 -6 19 2 0.89 1.1 
 -5 -19 2 8.37 1.25 
 5 -19 -2 8.37 1.47 
 5 -19 -2 4.61 1.08 
 -5 -19 2 6.66 1.15 
 -5 -19 2 9.43 1.6 
 -5 19 2 6.09 1.31 
 5 19 -2 7.29 1.31 
 4 -19 -2 2.28 0.91 
 -4 -19 2 1.41 0.75 
 -4 -19 2 0.72 0.8 
 -4 -19 2 2.81 0.91 
 4 -19 -2 3.17 1.19 
 -4 19 2 -0.87 0.86 
 4 19 -2 1.43 0.96 
 3 -19 -2 7.56 1.16 
 3 -19 -2 6.7 1.38 
 -3 -19 2 5.98 1.24 
 -3 -19 2 8.79 1.16 
 -3 19 2 5.52 1.26 
 3 19 -2 5.85 1.27 
 2 -19 -2 2.76 0.95 
 2 -19 -2 3.21 1.08 
 -2 -19 2 1.74 1.02 
 -2 -19 2 1.24 0.74 
 -2 19 2 1.89 1.01 
 2 19 -2 1.19 1.02 
 -1 -19 2 0.36 0.83 
 -1 -19 2 -0.01 0.63 
 1 -19 -2 1.42 0.85 
 -1 19 2 0.36 0.84 
 1 19 -2 0.12 0.92 
 0 -19 -2 1.17 0.85 
 0 -19 2 0.54 0.91 
 0 -19 2 -0.22 0.58 
 0 19 2 -0.84 0.84 
 0 19 -2 -0.37 0.94 
 1 -19 2 -0.24 0.86 
 -1 -19 -2 0.4 0.83 
 1 -19 2 1.39 0.7 
 -1 19 -2 -0.85 0.93 
 1 19 2 -0.11 0.82 
 2 -19 2 2.06 1.03 
 2 -19 2 1.72 0.73 
 -2 -19 -2 2.46 1 
 2 19 2 1.16 0.87 
 -2 19 -2 2.18 1.14 
 -3 -19 -2 -0.24 0.87 
 3 -19 2 0.34 0.89 
 -3 19 -2 -1.18 0.98 
 3 19 2 -1.48 0.71 
 4 -19 2 2.01 1.1 
 -4 -19 -2 1.87 1.05 
 -4 -19 -2 1.61 0.56 
 -4 19 -2 3.03 1.26 
 4 19 2 2.21 0.87 
 -5 -19 -2 0.08 0.48 
 5 -19 2 -0.94 0.98 
 -5 -19 -2 -0.18 0.99 
 5 19 2 -0.25 0.77 
 -5 19 -2 -1.17 1.01 
 6 -19 2 -0.31 1.09 
 -6 -19 -2 1.3 1.09 
 -6 -19 -2 0.29 0.48 
 6 19 2 0.49 0.81 
 -6 19 -2 -0.12 1.03 
 -7 -19 -2 6.11 0.76 
 7 -19 2 6.24 1.46 
 -5 -20 2 4.05 1.09 
 -5 -20 2 1.13 0.92 
 5 -20 -2 2.55 1.04 
 5 -20 -2 2.83 1.15 
 5 20 -2 3.62 1.12 
 -5 20 2 4.76 1.39 
 -4 -20 2 -0.48 0.76 
 4 -20 -2 0.46 0.86 
 -4 -20 2 -0.04 0.73 
 -4 -20 2 0.37 0.77 
 4 -20 -2 0.52 0.99 
 4 20 -2 1.13 0.93 
 -4 20 2 2.42 1.13 
 -3 -20 2 1.6 0.83 
 -3 -20 2 0.23 0.87 
 3 -20 -2 0.67 0.98 
 3 -20 -2 0.9 0.91 
 -3 20 2 0.9 1.01 
 3 20 -2 1.69 1 
 2 -20 -2 4.88 1.28 
 -2 -20 2 4.22 0.97 
 2 -20 -2 4.18 1.05 
 -2 -20 2 5.06 1.3 
 2 20 -2 2.71 1.11 
 -2 20 2 4.3 1.21 
 -1 -20 2 2.97 1.1 
 1 -20 -2 2.06 0.97 
 -1 -20 2 3.76 0.86 
 1 20 -2 2.44 1.13 
 -1 20 2 3.48 1.12 
 0 -20 -2 0.96 0.83 
 0 -20 2 0.51 1.04 
 0 -20 2 1.17 0.72 
 0 20 -2 -1 0.97 
 0 20 2 0.56 0.99 
 1 -20 2 13.51 1.73 
 -1 -20 -2 13 1.52 
 1 -20 2 17.9 1.67 
 1 20 2 13.92 1.6 
 -1 20 -2 11.09 1.62 
 -2 -20 -2 1.92 0.97 
 2 -20 2 1.42 1.15 
 -2 20 -2 1.84 1.16 
 2 20 2 0.69 0.87 
 -3 -20 -2 1.96 1.09 
 3 -20 2 1.27 1.15 
 3 20 2 2.66 0.94 
 -3 20 -2 0.61 1.04 
 -4 -20 -2 1.8 1.14 
 4 -20 2 0.25 1.01 
 -4 20 -2 0.55 1.07 
 4 20 2 1.78 0.9 
 5 -20 2 4.32 1.3 
 -5 -20 -2 4.7 1.28 
 -5 -20 -2 3.66 0.63 
 -5 20 -2 7.04 1.59 
 5 20 2 5.14 1.08 
 3 -21 -2 1.91 0.99 
 -3 -21 2 3.34 1.18 
 -3 -21 2 -0.02 0.81 
 3 -21 -2 1.38 1.22 
 -3 -21 2 2.11 0.91 
 3 21 -2 1.46 1.14 
 -3 21 2 0.84 1.12 
 2 -21 -2 1.29 1.14 
 -2 -21 2 1.11 0.79 
 2 -21 -2 -0.53 0.89 
 -2 -21 2 1.55 1.05 
 -2 21 2 0.95 1.04 
 2 21 -2 0.28 1 
 1 -21 -2 2.51 1.02 
 -1 -21 2 0.96 0.8 
 -1 -21 2 0.31 0.92 
 1 -21 -2 1.27 1.21 
 -1 21 2 -0.15 0.98 
 1 21 -2 0.43 1.02 
 0 -21 -2 0.31 0.92 
 0 -21 2 2.38 1.24 
 0 21 2 -0.1 1.03 
 0 21 -2 0.03 1.01 
 -1 -21 -2 4.24 1.16 
 1 -21 2 3.38 1.36 
 1 21 2 5.34 1.24 
 -1 21 -2 4.45 1.34 
 2 -21 2 -0.72 0.95 
 -2 -21 -2 0.29 0.94 
 2 21 2 1.48 0.95 
 -2 21 -2 0.39 1.08 
 -3 -21 -2 0.12 0.98 
 3 -21 2 0.75 1.12 
 3 21 2 1.49 0.95 
 -3 21 -2 -0.27 1.12 
 -14 0 3 -0.09 1.07 
 -14 0 3 -2.18 0.86 
 -13 0 3 6.41 1.36 
 -13 0 3 4.92 1.19 
 -12 0 3 0.46 0.82 
 -12 0 3 -0.15 0.58 
 -12 0 3 0.87 0.85 
 -11 0 3 1.53 0.84 
 -11 0 3 1.95 0.87 
 -11 0 3 0.79 0.6 
 -10 0 3 0.02 0.73 
 -10 0 3 0.24 0.52 
 -10 0 3 1.39 0.73 
 -9 0 3 6.31 0.79 
 -9 0 3 5.31 0.88 
 -9 0 3 6.93 0.96 
 -8 0 3 0.11 0.51 
 -8 0 3 0.07 0.43 
 -8 0 3 -0.16 0.52 
 -7 0 3 4.11 0.71 
 -7 0 3 4.92 0.73 
 -6 0 3 -0.05 0.42 
 -6 0 3 0.1 0.47 
 -5 0 3 5.39 0.68 
 5 0 -3 5.4 0.64 
 -5 0 3 3.99 0.57 
 4 0 -3 -0.3 0.36 
 4 0 -3 0.48 0.45 
 -4 0 3 0.17 0.4 
 4 0 -3 -0.05 0.37 
 -4 0 3 -0.03 0.37 
 -3 0 3 8.9 0.67 
 3 0 -3 9.6 0.71 
 -3 0 3 9.79 0.73 
 3 0 -3 9.52 0.69 
 3 0 -3 9.14 0.69 
 3 0 -3 8.97 0.42 
 -3 0 3 9.29 0.7 
 -2 0 3 -0.07 0.34 
 2 0 -3 -0.04 0.3 
 2 0 -3 0.11 0.22 
 2 0 -3 0.91 0.39 
 -2 0 3 -0.18 0.28 
 2 0 -3 -0.48 0.29 
 -2 0 3 0.03 0.3 
 -2 0 3 -0.25 0.34 
 2 0 -3 -0.05 0.05 
 -1 0 3 78.91 2.38 
 -1 0 3 79.87 2.36 
 1 0 -3 77.49 2.36 
 -1 0 3 82.89 2.38 
 -1 0 3 75.47 2.39 
 1 0 -3 82.95 2.36 
 1 0 -3 79.31 2.41 
 -1 0 3 79.23 2.34 
 0 0 -3 0.17 0.29 
 0 0 3 -0.03 0.24 
 0 0 -3 -0.16 0.22 
 0 0 -3 0.18 0.26 
 0 0 3 0.05 0.23 
 0 0 -3 -0.11 0.21 
 0 0 3 -0.44 0.21 
 0 0 3 -0.46 0.19 
 -1 0 -3 429.93 11.93 
 1 0 3 413.55 11.84 
 1 0 3 434.22 11.9 
 -1 0 -3 438.62 11.8 
 1 0 3 420.45 11.93 
 1 0 3 435.26 11.8 
 1 0 3 442.5 11.88 
 -1 0 -3 418.42 11.9 
 -1 0 -3 442.23 11.85 
 -2 0 -3 0.27 0.38 
 2 0 3 -0.32 0.32 
 2 0 3 -0.03 0.38 
 -2 0 -3 0.01 0.34 
 2 0 3 0.11 0.32 
 -2 0 -3 0.28 0.3 
 -2 0 -3 -0.15 0.26 
 2 0 3 0.03 0.27 
 -3 0 -3 49.61 1.69 
 3 0 3 49.97 1.76 
 -3 0 -3 50.74 1.76 
 -3 0 -3 48.4 1.7 
 3 0 3 48.33 1.75 
 3 0 3 47.72 1.69 
 -4 0 -3 0.13 0.4 
 4 0 3 0.61 0.5 
 -4 0 -3 -0.07 0.39 
 4 0 3 1.08 0.46 
 4 0 3 0 0.39 
 -4 0 -3 -0.39 0.35 
 -5 0 -3 264.37 7.67 
 5 0 3 261.58 7.6 
 5 0 3 266.78 7.68 
 -5 0 -3 255.31 7.57 
 5 0 3 265.36 7.38 
 -5 0 -3 265.89 7.65 
 -6 0 -3 -0.32 0.44 
 -6 0 -3 -0.11 0.5 
 6 0 3 -0.12 0.38 
 6 0 3 -0.15 0.25 
 -7 0 -3 3.27 0.63 
 -7 0 -3 2.33 0.7 
 7 0 3 2.68 0.56 
 7 0 3 3.02 0.4 
 -8 0 -3 0.29 0.56 
 -8 0 -3 0.94 0.59 
 8 0 3 0.36 0.45 
 -9 0 -3 0.19 0.59 
 -9 0 -3 0.09 0.7 
 9 0 3 0.07 0.47 
 10 0 3 0.29 0.51 
 -10 0 -3 -1.03 0.63 
 -10 0 -3 -0.84 0.64 
 -11 0 -3 13.36 1.51 
 -11 0 -3 13.68 1.42 
 11 0 3 12.03 1.08 
 -12 0 -3 -0.57 0.86 
 -12 0 -3 -0.11 0.81 
 -13 0 -3 1.95 1.14 
 -13 0 -3 3.31 1.1 
 -14 0 -3 -2.15 0.88 
 -14 0 -3 -0.96 0.9 
 -14 -1 3 3.14 1.31 
 -14 -1 3 3.49 1.22 
 -14 1 3 4.71 1.36 
 -14 1 3 4.89 1.25 
 -13 -1 3 4.07 1.27 
 -13 -1 3 5.83 1.21 
 -13 1 3 6.08 1.34 
 -13 1 3 6.81 1.24 
 -12 -1 3 -0.82 0.52 
 -12 -1 3 1.6 0.89 
 -12 -1 3 0.61 0.97 
 -12 1 3 -0.27 0.85 
 -12 1 3 -0.28 0.88 
 -12 1 3 -0.69 0.56 
 -11 -1 3 16 1.53 
 -11 -1 3 18.8 1.58 
 -11 -1 3 14.36 1.14 
 -11 1 3 15.95 1.26 
 -11 1 3 13.94 1.45 
 -11 1 3 17.1 1.62 
 -10 -1 3 7.22 1.03 
 -10 -1 3 7.43 0.85 
 -10 -1 3 7.09 1.06 
 -10 1 3 9.37 1.14 
 -10 1 3 6.88 1.05 
 -10 1 3 9.01 0.95 
 -9 -1 3 34.71 1.55 
 -9 -1 3 33.34 1.78 
 -9 -1 3 34.53 1.78 
 -9 1 3 32.67 1.58 
 -9 1 3 30.67 1.73 
 -9 1 3 38.45 1.86 
 8 -1 -3 0.7 0.19 
 -8 -1 3 0.35 0.53 
 -8 -1 3 2.26 0.72 
 -8 1 3 0.64 0.57 
 -8 1 3 1.6 0.54 
 -8 1 3 1.39 0.67 
 -7 -1 3 105.36 3.46 
 -7 -1 3 101.4 3.53 
 7 -1 -3 104.18 2.98 
 -7 1 3 105.63 3.52 
 -7 1 3 103.95 3.55 
 -7 1 3 105.09 3.39 
 -6 -1 3 27.24 1.31 
 6 -1 -3 26.68 0.9 
 -6 -1 3 27.61 1.37 
 -6 1 3 27.43 1.37 
 -6 1 3 26.86 1.34 
 -5 -1 3 3.57 0.54 
 -5 -1 3 5.75 0.72 
 5 -1 -3 3.99 0.64 
 5 -1 -3 3.64 0.29 
 5 1 -3 3.91 0.54 
 -5 1 3 3.15 0.58 
 -5 1 3 4.8 0.65 
 -4 -1 3 4.16 0.52 
 4 -1 -3 3.92 0.58 
 -4 -1 3 3.03 0.54 
 4 -1 -3 3.16 0.53 
 4 -1 -3 3.74 0.3 
 -4 1 3 3.59 0.53 
 -4 1 3 4.19 0.55 
 4 1 -3 3.01 0.49 
 3 -1 -3 39.13 1.23 
 -3 -1 3 37.85 1.44 
 3 -1 -3 38.95 1.46 
 -3 -1 3 37.14 1.38 
 -3 -1 3 39.15 1.39 
 -3 -1 3 38.1 1.13 
 -3 -1 3 37.48 1.41 
 3 -1 -3 40.01 1.45 
 -3 1 3 40.59 1.47 
 -3 1 3 37.87 1.44 
 -3 1 3 39.05 1.47 
 -3 1 3 38.14 1.46 
 3 1 -3 37.91 1.14 
 3 1 -3 38.74 1.41 
 -2 -1 3 8.24 0.56 
 -2 -1 3 8.02 0.62 
 2 -1 -3 10.07 0.66 
 -2 -1 3 8.91 0.43 
 -2 -1 3 9.25 0.62 
 2 -1 -3 9.83 0.66 
 -2 -1 3 9.09 0.56 
 2 -1 -3 9.75 0.64 
 2 -1 -3 8.94 0.57 
 2 -1 -3 9.15 0.51 
 2 1 -3 8.57 0.61 
 2 1 -3 8.92 0.63 
 -2 1 3 9.27 0.52 
 2 1 -3 8.86 0.57 
 -2 1 3 8.89 0.65 
 2 1 -3 9.15 0.64 
 -2 1 3 8.55 0.63 
 2 1 -3 8.81 0.47 
 -2 1 3 9.55 0.62 
 -1 -1 3 69.14 2.05 
 1 -1 -3 68.39 2.09 
 -1 -1 3 68.75 2.06 
 1 -1 -3 69.12 2.05 
 -1 -1 3 68.83 2.12 
 1 -1 -3 70.75 2.09 
 1 -1 -3 64.89 2.1 
 -1 -1 3 68.7 2.05 
 1 -1 -3 68.53 2.14 
 1 1 -3 69.32 2.07 
 -1 1 3 69.66 2.09 
 1 1 -3 69.87 2.13 
 -1 1 3 68.29 2.08 
 1 1 -3 64.64 2.04 
 1 1 -3 68.54 2.06 
 -1 1 3 69.7 2.05 
 -1 1 3 69.7 2.11 
 0 -1 -3 12.07 0.64 
 0 -1 -3 12.17 0.62 
 0 -1 -3 12.43 0.66 
 0 -1 3 13.08 0.64 
 0 -1 -3 12.72 0.6 
 0 -1 3 12.02 0.64 
 0 -1 3 12.47 0.5 
 0 -1 3 12.29 0.59 
 0 1 3 12.81 0.63 
 0 1 -3 13.23 0.67 
 0 1 3 13.07 0.67 
 0 1 -3 12.97 0.51 
 0 1 -3 12.51 0.65 
 0 1 3 13.47 0.59 
 0 1 3 12.1 0.62 
 1 -1 3 2.19 0.35 
 1 -1 3 2.59 0.37 
 -1 -1 -3 2.8 0.31 
 1 -1 3 2.61 0.37 
 -1 -1 -3 3.2 0.46 
 -1 -1 -3 2.47 0.38 
 1 -1 3 2.29 0.41 
 -1 -1 -3 2.54 0.33 
 1 -1 3 2.54 0.22 
 -1 1 -3 2.41 0.38 
 1 1 3 2.06 0.36 
 1 1 3 2.38 0.32 
 1 1 3 2.83 0.34 
 -1 1 -3 2.33 0.34 
 -1 1 -3 2.28 0.35 
 -1 1 -3 2.74 0.22 
 1 1 3 2.54 0.38 
 1 1 3 2.23 0.31 
 -2 -1 -3 13.21 0.78 
 -2 -1 -3 12.64 0.65 
 -2 -1 -3 13.05 0.73 
 2 -1 3 13.76 0.81 
 -2 -1 -3 13.41 0.55 
 2 -1 3 13.84 0.78 
 -2 -1 -3 12.46 0.66 
 2 -1 3 13.94 0.77 
 2 1 3 13.73 0.78 
 -2 1 -3 11.92 0.54 
 2 1 3 13.17 0.67 
 -2 1 -3 12.7 0.77 
 2 1 3 13 0.67 
 2 1 3 13.79 0.81 
 -2 1 -3 11.72 0.7 
 2 1 3 12.29 0.55 
 -2 1 -3 11.77 0.77 
 3 -1 3 57.03 1.91 
 -3 -1 -3 60.63 1.92 
 3 -1 3 56.19 1.9 
 -3 -1 -3 55.47 1.92 
 -3 -1 -3 53.13 1.84 
 3 -1 3 53.06 1.92 
 -3 -1 -3 52.66 1.8 
 3 1 3 55.43 1.92 
 -3 1 -3 58.54 1.93 
 -3 1 -3 55.96 1.93 
 3 1 3 56.12 1.86 
 3 1 3 53.75 1.65 
 -3 1 -3 54.45 1.92 
 3 1 3 56.82 1.92 
 -4 -1 -3 77.61 2.52 
 4 -1 3 74.17 2.52 
 -4 -1 -3 80.63 2.48 
 -4 -1 -3 76.94 2.48 
 4 -1 3 76.95 2.5 
 4 1 3 75.49 2.47 
 -4 1 -3 72.64 2.52 
 4 1 3 76.8 2.51 
 -4 1 -3 73.75 2.47 
 4 1 3 76.67 2.5 
 4 1 3 70.71 2.19 
 -4 1 -3 71.73 2.51 
 5 -1 3 197.71 5.87 
 -5 -1 -3 198.06 5.85 
 -5 -1 -3 201.03 5.92 
 5 -1 3 209.01 5.95 
 -5 -1 -3 197.84 5.89 
 5 1 3 192.27 5.55 
 -5 1 -3 199.62 5.94 
 5 1 3 192.36 5.85 
 -5 1 -3 201.81 5.95 
 6 -1 3 30.92 1.21 
 -6 -1 -3 29.95 1.48 
 6 -1 3 29.92 1.4 
 -6 -1 -3 30.89 1.43 
 -6 1 -3 31.72 1.53 
 6 1 3 32.93 1.08 
 6 1 3 32.01 1.38 
 -6 1 -3 29.85 1.48 
 7 -1 3 0.38 0.3 
 -7 -1 -3 -0.53 0.44 
 -7 -1 -3 0.13 0.53 
 7 -1 3 0.44 0.45 
 7 1 3 0.26 0.43 
 -7 1 -3 0.14 0.57 
 -7 1 -3 0.34 0.52 
 -8 -1 -3 1.95 0.65 
 -8 -1 -3 1.3 0.68 
 8 -1 3 1.85 0.54 
 -8 1 -3 2.12 0.68 
 -8 1 -3 1.67 0.63 
 8 1 3 1.65 0.52 
 9 -1 3 14.85 1.06 
 -9 -1 -3 13.87 1.24 
 -9 -1 -3 13.69 1.29 
 -9 1 -3 12.93 1.19 
 9 1 3 12.61 1.02 
 -9 1 -3 14.38 1.3 
 10 -1 3 3.42 0.69 
 -10 -1 -3 2.03 0.88 
 -10 -1 -3 2.07 0.81 
 10 1 3 2.62 0.65 
 -10 1 -3 2.91 0.83 
 -10 1 -3 2.83 0.94 
 -11 -1 -3 11.38 1.36 
 -11 -1 -3 10.24 1.26 
 11 -1 3 13.09 1.13 
 -11 1 -3 10.91 1.27 
 -11 1 -3 11.46 1.37 
 11 1 3 10.78 1.06 
 -12 -1 -3 2.16 1.04 
 -12 -1 -3 1.12 0.93 
 -12 1 -3 2.04 0.95 
 -12 1 -3 2.17 1.08 
 -13 -1 -3 4.43 1.18 
 -13 -1 -3 5.58 1.23 
 -13 1 -3 4.48 1.32 
 -13 1 -3 6.39 1.27 
 -14 -1 -3 -1.06 0.88 
 -14 -1 -3 2.02 1.2 
 -14 1 -3 -0.58 1.08 
 -14 -2 3 5.94 1.45 
 -14 -2 3 5.17 1.24 
 -14 2 3 5.38 1.32 
 -14 2 3 5.49 1.3 
 -13 -2 3 0.77 1.07 
 -13 -2 3 -0.86 0.84 
 -13 2 3 -0.13 0.95 
 -13 2 3 0.19 0.9 
 -12 -2 3 1.02 0.9 
 -12 -2 3 -0.79 0.79 
 -12 2 3 2.15 0.94 
 -12 2 3 0.03 0.84 
 -12 2 3 0.98 0.67 
 -11 -2 3 1.67 0.81 
 -11 -2 3 1.21 0.59 
 -11 -2 3 1.4 0.81 
 -11 2 3 -0.85 0.77 
 -11 2 3 -0.26 0.62 
 -11 2 3 0.69 0.79 
 -10 -2 3 17.7 1.44 
 -10 -2 3 17.5 1.12 
 -10 -2 3 19.4 1.43 
 -10 2 3 18.28 1.25 
 -10 2 3 18.32 1.53 
 -10 2 3 14.95 1.41 
 9 -2 -3 16.92 0.75 
 -9 -2 3 16.94 1.31 
 -9 -2 3 17.95 1.46 
 -9 2 3 17.97 1.49 
 -9 2 3 17.17 1.18 
 -9 2 3 17.22 1.38 
 -8 -2 3 0.56 0.52 
 8 -2 -3 1.7 0.31 
 -8 -2 3 0.89 0.61 
 -8 2 3 0.17 0.56 
 -8 2 3 2.39 0.59 
 -8 2 3 0.78 0.57 
 -7 -2 3 6.78 0.83 
 7 -2 -3 6.57 0.49 
 -7 -2 3 8 0.83 
 -7 2 3 7.56 0.86 
 -7 2 3 7.51 0.91 
 -7 2 3 5.92 0.74 
 6 -2 -3 12.87 1.01 
 6 -2 -3 12.16 0.62 
 -6 -2 3 12.46 0.9 
 -6 -2 3 12.9 1.05 
 -6 2 3 12.86 0.93 
 -6 2 3 13.53 0.96 
 6 2 -3 13.75 0.93 
 -6 2 3 12.81 1 
 5 -2 -3 2.31 0.33 
 -5 -2 3 2.93 0.57 
 -5 -2 3 2.49 0.47 
 5 -2 -3 2.27 0.58 
 -5 2 3 1.8 0.44 
 5 2 -3 3.19 0.48 
 -5 2 3 2.16 0.56 
 -5 2 3 2.62 0.53 
 4 -2 -3 6.28 0.61 
 -4 -2 3 6.79 0.58 
 -4 -2 3 5.85 0.56 
 4 -2 -3 6.33 0.67 
 -4 -2 3 4.82 0.61 
 4 2 -3 7.08 0.79 
 -4 2 3 6.12 0.65 
 -4 2 3 5.59 0.63 
 4 2 -3 6.25 0.6 
 -4 2 3 5.69 0.61 
 -3 -2 3 1.56 0.23 
 -3 -2 3 1.55 0.36 
 3 -2 -3 1.81 0.44 
 -3 -2 3 2.03 0.45 
 -3 -2 3 1.94 0.44 
 3 -2 -3 1.72 0.47 
 -3 -2 3 1.05 0.35 
 3 2 -3 1.62 0.22 
 3 2 -3 1.71 0.4 
 -3 2 3 1.83 0.45 
 3 2 -3 1.56 0.44 
 -3 2 3 1.75 0.46 
 -3 2 3 2.29 0.49 
 -3 2 3 2.41 0.49 
 -2 -2 3 8.39 0.6 
 -2 -2 3 8.07 0.48 
 -2 -2 3 8.5 0.6 
 -2 -2 3 8.74 0.64 
 2 -2 -3 9.34 0.71 
 -2 -2 3 9.08 0.52 
 2 -2 -3 9.72 0.6 
 2 -2 -3 9.7 0.6 
 2 -2 -3 8.69 0.64 
 2 2 -3 9 0.64 
 -2 2 3 9.04 0.6 
 -2 2 3 10.37 0.73 
 2 2 -3 8.08 0.64 
 -2 2 3 9.67 0.69 
 2 2 -3 9.38 0.5 
 -1 -2 3 44.71 1.5 
 -1 -2 3 44.06 1.42 
 -1 -2 3 45.29 1.45 
 1 -2 -3 45.19 1.51 
 1 -2 -3 45.39 1.4 
 -1 -2 3 43.85 1.39 
 1 -2 -3 45.09 1.52 
 1 -2 -3 45.73 1.51 
 1 2 -3 44.4 1.39 
 1 2 -3 46.48 1.47 
 -1 2 3 45.16 1.4 
 -1 2 3 44.41 1.51 
 -1 2 3 43.37 1.5 
 1 2 -3 46.96 1.54 
 0 -2 3 0.98 0.18 
 0 -2 -3 0.98 0.33 
 0 -2 3 0.67 0.3 
 0 -2 -3 1.14 0.35 
 0 -2 3 1.13 0.37 
 0 -2 3 1.2 0.25 
 0 -2 -3 0.85 0.33 
 0 2 3 1.36 0.37 
 0 2 -3 0.5 0.24 
 0 2 -3 1.26 0.33 
 0 2 -3 1.31 0.37 
 0 2 3 0.62 0.3 
 0 2 3 1.16 0.34 
 1 -2 3 19.05 0.82 
 1 -2 3 19.26 0.88 
 -1 -2 -3 16.92 0.83 
 -1 -2 -3 19.79 0.69 
 1 -2 3 19.29 0.92 
 1 -2 3 18.64 0.85 
 -1 -2 -3 19.69 0.74 
 -1 -2 -3 18.79 0.83 
 -1 -2 -3 17.89 0.88 
 1 2 3 19.68 0.86 
 1 2 3 19.78 0.7 
 1 2 3 17.12 0.87 
 1 2 3 18.85 0.83 
 -1 2 -3 20.49 0.93 
 -2 -2 -3 1.99 0.41 
 2 -2 3 1.47 0.41 
 -2 -2 -3 1.28 0.38 
 -2 -2 -3 1.15 0.29 
 -2 -2 -3 1.57 0.39 
 -2 -2 -3 1.33 0.23 
 2 -2 3 0.96 0.45 
 2 -2 3 1.69 0.49 
 -2 2 -3 1.77 0.47 
 -2 2 -3 0.99 0.41 
 2 2 3 1.12 0.31 
 2 2 3 1.3 0.38 
 2 2 3 1.55 0.26 
 2 2 3 1.58 0.45 
 -2 2 -3 1.98 0.42 
 2 2 3 1.52 0.39 
 3 -2 3 54.58 1.82 
 -3 -2 -3 48.33 1.75 
 -3 -2 -3 49.68 1.76 
 3 -2 3 50.25 1.81 
 -3 -2 -3 50.61 1.73 
 3 -2 3 47.84 1.77 
 -3 -2 -3 50.12 1.69 
 -3 2 -3 50.6 1.78 
 3 2 3 50.29 1.75 
 3 2 3 49.61 1.46 
 3 2 3 49.16 1.79 
 -3 2 -3 49.59 1.78 
 3 2 3 50.2 1.68 
 -3 2 -3 51.16 1.79 
 4 -2 3 2.18 0.55 
 -4 -2 -3 1.84 0.51 
 -4 -2 -3 1.93 0.46 
 -4 -2 -3 1.6 0.45 
 4 -2 3 2.13 0.51 
 4 2 3 1.67 0.49 
 -4 2 -3 2.44 0.51 
 4 2 3 2.18 0.19 
 4 2 3 2.71 0.49 
 4 2 3 2.81 0.52 
 -4 2 -3 1.9 0.49 
 -4 2 -3 1.59 0.47 
 -5 -2 -3 44.16 1.7 
 5 -2 3 48.24 1.84 
 -5 -2 -3 44.03 1.77 
 -5 -2 -3 43.15 1.69 
 5 -2 3 45.33 1.77 
 -5 2 -3 44.87 1.8 
 -5 2 -3 46.31 1.82 
 5 2 3 44.72 1.33 
 5 2 3 47.31 1.75 
 -6 -2 -3 37.13 1.56 
 6 -2 3 35.85 1.58 
 6 -2 3 33.47 1.5 
 -6 -2 -3 33.94 1.56 
 6 -2 3 35.48 1.37 
 6 2 3 33.72 1.47 
 -6 2 -3 35.29 1.64 
 -6 2 -3 31.14 1.56 
 -7 -2 -3 6.33 0.79 
 -7 -2 -3 5.37 0.78 
 7 -2 3 5.27 0.7 
 -7 2 -3 4.62 0.77 
 7 2 3 6.34 0.74 
 -7 2 -3 4.78 0.8 
 8 -2 3 10.08 0.94 
 -8 -2 -3 8.92 0.95 
 -8 -2 -3 10.01 1.05 
 -8 2 -3 10.24 1.14 
 8 2 3 9.65 0.87 
 -8 2 -3 10.08 1.04 
 -9 -2 -3 3.97 0.83 
 -9 -2 -3 4.44 0.83 
 9 -2 3 5.51 0.78 
 -9 2 -3 5.3 0.94 
 9 2 3 5.91 0.74 
 -9 2 -3 4.33 0.88 
 -10 -2 -3 8.57 1.1 
 10 -2 3 9.76 1 
 -10 -2 -3 8.13 1.1 
 -10 2 -3 7.83 1.18 
 -10 2 -3 6.16 1.01 
 10 2 3 9.66 0.93 
 11 -2 3 1.46 0.65 
 -11 -2 -3 1.35 0.79 
 -11 -2 -3 2.5 0.85 
 -11 2 -3 1.23 0.8 
 -11 2 -3 2.46 1.02 
 -12 -2 -3 3.62 1.16 
 -12 -2 -3 3.5 1.06 
 -12 2 -3 4.8 1.07 
 -12 2 -3 5.57 1.2 
 -13 -2 -3 0.52 0.92 
 -13 -2 -3 1.58 1.11 
 -13 2 -3 2.34 1.2 
 -14 -2 -3 -0.22 0.96 
 -14 -2 -3 1.99 1.16 
 -14 2 -3 1.68 1.21 
 -14 -3 3 4.42 1.23 
 -14 -3 3 3.22 1.14 
 -14 3 3 4.5 1.25 
 -14 3 3 2.98 1.24 
 -13 -3 3 11.3 1.47 
 -13 -3 3 10.24 1.59 
 -13 3 3 9.6 1.45 
 -13 3 3 7.93 1.4 
 -12 -3 3 4.89 1.22 
 -12 -3 3 4.97 1.06 
 -12 3 3 4.87 1.16 
 -12 3 3 4.36 0.9 
 -12 3 3 3.08 1.06 
 -11 -3 3 6.11 0.79 
 -11 -3 3 6.88 1.21 
 -11 -3 3 6.86 1.04 
 -11 3 3 6.1 1.1 
 -11 3 3 6.37 1.14 
 -11 3 3 6.12 0.95 
 -10 -3 3 -0.22 0.59 
 -10 -3 3 0.34 0.49 
 -10 -3 3 0.57 0.71 
 -10 3 3 0.06 0.7 
 -10 3 3 1.06 0.63 
 -10 3 3 0.78 0.73 
 -9 -3 3 9.41 1.11 
 -9 -3 3 8.53 0.97 
 9 -3 -3 8.13 0.63 
 -9 3 3 11.5 1.05 
 -9 3 3 8.75 1.07 
 -9 3 3 8.75 1.05 
 -8 -3 3 12.94 1.2 
 8 -3 -3 10.98 0.68 
 -8 -3 3 12.42 1.03 
 -8 3 3 10.04 1.03 
 -8 3 3 11.61 1.02 
 -8 3 3 9.55 1 
 7 -3 -3 44.85 1.88 
 -7 -3 3 43.49 1.94 
 7 -3 -3 42.09 1.49 
 -7 -3 3 40.41 1.72 
 -7 3 3 41.05 1.85 
 -7 3 3 43.18 1.8 
 -7 3 3 42.4 1.85 
 6 -3 -3 44.08 1.79 
 -6 -3 3 43.3 1.64 
 6 -3 -3 41.01 1.46 
 -6 -3 3 42.22 1.83 
 -6 3 3 42.33 1.74 
 6 3 -3 42.17 1.58 
 -6 3 3 40.93 1.78 
 -6 3 3 38.17 1.73 
 -5 -3 3 16.66 0.85 
 -5 -3 3 17.34 0.55 
 -5 -3 3 15.39 0.56 
 -5 -3 3 13.76 0.86 
 -5 -3 3 15.98 1.01 
 5 -3 -3 15.08 1.03 
 -5 3 3 16.32 1.06 
 -5 3 3 14.66 0.95 
 5 3 -3 16.89 1.03 
 5 3 -3 18.18 0.89 
 -5 3 3 16.72 1.03 
 -4 -3 3 33.83 1.31 
 -4 -3 3 33.52 1.48 
 4 -3 -3 34.29 1.37 
 -4 -3 3 35.43 1.11 
 4 -3 -3 36.24 1.47 
 -4 -3 3 33.62 1.29 
 4 3 -3 33.54 1.46 
 -4 3 3 34.74 1.47 
 -4 3 3 33.68 1.4 
 -4 3 3 34.55 1.46 
 -4 3 3 36.94 1.47 
 4 3 -3 35.48 1.32 
 3 -3 -3 12.9 0.74 
 -3 -3 3 13.54 0.66 
 -3 -3 3 12.1 0.86 
 3 -3 -3 12.93 0.85 
 -3 -3 3 12.07 0.71 
 -3 -3 3 12.15 0.58 
 -3 3 3 12.52 0.75 
 -3 3 3 12.67 0.89 
 -3 3 3 12.12 0.84 
 3 3 -3 13.13 0.86 
 -3 3 3 13.46 0.84 
 -3 3 3 11.36 0.8 
 3 3 -3 10.97 0.75 
 -2 -3 3 6.27 0.58 
 -2 -3 3 6.74 0.52 
 2 -3 -3 5.56 0.56 
 2 -3 -3 8.98 0.68 
 -2 -3 3 7.34 0.45 
 -2 -3 3 7.07 0.57 
 2 -3 -3 7.28 0.52 
 -2 3 3 6.54 0.57 
 -2 3 3 7.82 0.53 
 -2 3 3 7.57 0.62 
 2 3 -3 7.75 0.6 
 2 3 -3 6.37 0.5 
 -1 -3 3 3.06 0.29 
 -1 -3 3 3.07 0.38 
 1 -3 -3 4.02 0.49 
 1 -3 -3 3.23 0.3 
 1 -3 -3 3.06 0.44 
 -1 -3 3 2.74 0.41 
 1 -3 -3 3.57 0.46 
 -1 3 3 2.85 0.41 
 1 3 -3 2.94 0.46 
 1 3 -3 3.26 0.28 
 1 3 -3 3.09 0.4 
 -1 3 3 3.88 0.33 
 -1 3 3 3.08 0.45 
 0 -3 3 72.59 2.16 
 0 -3 -3 74.7 2.32 
 0 -3 3 69.84 2.27 
 0 -3 3 70.54 2.27 
 0 -3 -3 67.6 2.25 
 0 -3 -3 73.51 2.28 
 0 3 -3 74.85 2.3 
 0 3 3 73.8 2.04 
 0 3 3 75.41 2.29 
 0 3 3 75.25 2.27 
 0 3 3 71.49 2.31 
 0 3 -3 72.78 2.15 
 -1 -3 -3 86.41 2.49 
 1 -3 3 89.56 2.65 
 1 -3 3 86.82 2.76 
 -1 -3 -3 85.75 2.68 
 -1 -3 -3 87.02 2.68 
 -1 -3 -3 88.86 2.76 
 1 3 3 91.47 2.69 
 1 3 3 87.24 2.78 
 -1 3 -3 91.54 2.76 
 1 3 3 86.34 2.49 
 1 3 3 88.47 2.7 
 -1 3 -3 89.26 2.64 
 -2 -3 -3 49.76 1.79 
 2 -3 3 51.36 1.74 
 -2 -3 -3 51.21 1.53 
 2 -3 3 51.12 1.78 
 -2 -3 -3 51.67 1.58 
 -2 -3 -3 48.83 1.71 
 2 -3 3 49.95 1.81 
 -2 -3 -3 49.48 1.73 
 2 3 3 49.85 1.58 
 -2 3 -3 51.31 1.77 
 2 3 3 52.13 1.72 
 2 3 3 47.61 1.77 
 2 3 3 51.53 1.74 
 -2 3 -3 51.01 1.44 
 -2 3 -3 52.81 1.83 
 3 -3 3 22.85 1.15 
 3 -3 3 23.29 1.2 
 -3 -3 -3 24.93 1.1 
 -3 -3 -3 25.18 0.99 
 3 -3 3 25.68 1.15 
 -3 -3 -3 24 1.1 
 -3 -3 -3 24.61 0.75 
 -3 -3 -3 23.66 1.1 
 -3 3 -3 23.18 1.1 
 3 3 3 22.29 1.06 
 -3 3 -3 23.18 1.17 
 -3 3 -3 25.13 1.17 
 3 3 3 23.4 0.98 
 -3 3 -3 24.46 0.84 
 3 3 3 24.3 1.14 
 -4 -3 -3 123.81 3.85 
 -4 -3 -3 125.95 3.78 
 -4 -3 -3 124.45 3.85 
 4 -3 3 123.66 3.89 
 -4 -3 -3 124.46 3.85 
 4 -3 3 133.88 3.93 
 4 3 3 127.87 3.79 
 -4 3 -3 123.61 3.65 
 4 3 3 126.96 3.88 
 -4 3 -3 124.24 3.89 
 -4 3 -3 123.68 3.92 
 -5 -3 -3 7.74 0.72 
 5 -3 3 9.84 0.84 
 -5 -3 -3 9.43 0.81 
 5 -3 3 8.83 0.84 
 -5 3 -3 6.88 0.78 
 -5 3 -3 8.31 0.61 
 -5 3 -3 7.74 0.78 
 5 3 3 7 0.72 
 -6 -3 -3 9.29 0.85 
 6 -3 3 7.89 0.81 
 -6 -3 -3 6.73 0.75 
 6 -3 3 8.98 0.86 
 -6 3 -3 8.74 0.89 
 6 3 3 8.23 0.77 
 -6 3 -3 7.19 0.87 
 -6 3 -3 9.37 0.78 
 7 -3 3 2.78 0.61 
 -7 -3 -3 3.71 0.67 
 -7 -3 -3 2.42 0.61 
 -7 3 -3 2.45 0.64 
 7 3 3 2.95 0.56 
 -7 3 -3 2.45 0.6 
 -8 -3 -3 0.09 0.6 
 -8 -3 -3 -0.44 0.49 
 8 -3 3 0.22 0.48 
 -8 3 -3 -0.46 0.6 
 8 3 3 0.1 0.45 
 -8 3 -3 -0.54 0.53 
 -9 -3 -3 7.39 1.01 
 -9 -3 -3 6.33 0.91 
 9 -3 3 4.6 0.75 
 -9 3 -3 8.38 1.06 
 9 3 3 5.77 0.78 
 -9 3 -3 6.77 1.06 
 10 -3 3 43.08 1.91 
 -10 -3 -3 37.1 2.05 
 -10 -3 -3 40.04 2.1 
 -10 3 -3 40.45 2.23 
 -10 3 -3 37.91 2.05 
 10 3 3 39.82 1.81 
 -11 -3 -3 8.4 1.2 
 11 -3 3 9.09 1.03 
 -11 -3 -3 9.53 1.23 
 -11 3 -3 7.24 1.13 
 -11 3 -3 7.46 1.21 
 -12 -3 -3 3 0.95 
 -12 -3 -3 2.65 0.94 
 -12 3 -3 3.18 0.99 
 -12 3 -3 2.06 1.09 
 -13 -3 -3 0.46 0.89 
 -13 -3 -3 0.01 0.91 
 -13 3 -3 -0.25 1.04 
 -14 -3 -3 1.05 0.97 
 -14 -3 -3 -0.43 0.92 
 -14 3 -3 -0.31 1.13 
 -14 -4 3 4.74 1.4 
 -14 -4 3 5.94 1.26 
 -14 4 3 5.83 1.43 
 -13 -4 3 0.8 0.91 
 -13 -4 3 -0.72 1.02 
 -13 4 3 0.29 0.93 
 -13 4 3 0.23 0.98 
 -12 -4 3 9.24 1.23 
 -12 -4 3 8.89 1.41 
 -12 4 3 8.01 1.3 
 -12 4 3 7.46 1.39 
 -11 -4 3 14.77 1.55 
 -11 -4 3 11.61 1.27 
 -11 -4 3 13.53 1.02 
 -11 4 3 10.91 1.35 
 -11 4 3 14.59 1.34 
 -11 4 3 12.67 1.39 
 -10 -4 3 11.93 1.17 
 -10 -4 3 14.54 1.47 
 -10 4 3 14.27 1.28 
 -10 4 3 13.33 1.44 
 -10 4 3 12.49 1.32 
 -9 -4 3 8.86 0.95 
 -9 -4 3 12.02 1.26 
 9 -4 -3 10.21 0.74 
 -9 4 3 12.3 1.29 
 -9 4 3 9.14 1.08 
 -9 4 3 9.7 1.02 
 8 -4 -3 8.31 0.68 
 -8 -4 3 7.22 0.8 
 -8 -4 3 6.8 0.91 
 -8 4 3 7.38 0.94 
 -8 4 3 8.8 1.05 
 -8 4 3 7.19 0.85 
 -7 -4 3 4.75 0.63 
 7 -4 -3 5.38 0.77 
 -7 -4 3 6.03 0.83 
 7 -4 -3 5.73 0.57 
 -7 4 3 5.53 0.81 
 -7 4 3 7.41 0.86 
 -7 4 3 6.48 0.86 
 6 -4 -3 8.45 0.66 
 -6 -4 3 9.02 0.66 
 6 -4 -3 8.58 0.97 
 6 -4 -3 8.66 0.86 
 -6 -4 3 8.34 0.71 
 -6 -4 3 8.22 0.43 
 -6 -4 3 8.24 0.87 
 -6 -4 3 8.15 0.4 
 6 4 -3 8.65 0.69 
 6 4 -3 9.08 0.91 
 -6 4 3 10.59 0.92 
 -6 4 3 6.87 0.8 
 -6 4 3 7.8 0.85 
 -5 -4 3 0.5 0.34 
 -5 -4 3 0.2 0.22 
 -5 -4 3 0.65 0.46 
 -5 -4 3 0.07 0.32 
 5 -4 -3 0.93 0.49 
 -5 4 3 0.8 0.49 
 5 4 -3 0.28 0.36 
 -5 4 3 -0.1 0.46 
 5 4 -3 0.81 0.46 
 -5 4 3 0.06 0.5 
 -5 4 3 0.34 0.45 
 -4 -4 3 3.82 0.58 
 -4 -4 3 4.8 0.4 
 4 -4 -3 5.52 0.6 
 -4 -4 3 5.48 0.55 
 -4 -4 3 5.01 0.47 
 4 -4 -3 4.84 0.61 
 -4 4 3 4.31 0.62 
 -4 4 3 5.56 0.66 
 4 4 -3 5.8 0.58 
 -4 4 3 6.79 0.66 
 4 4 -3 5.14 0.68 
 -4 4 3 5.15 0.68 
 -3 -4 3 15.7 0.92 
 -3 -4 3 15.72 0.74 
 -3 -4 3 16.65 0.69 
 3 -4 -3 16.49 0.81 
 3 -4 -3 17.21 0.95 
 -3 -4 3 14.9 0.69 
 -3 -4 3 14.17 0.79 
 -3 4 3 16.61 1.04 
 3 4 -3 14.75 0.82 
 -3 4 3 16.8 0.96 
 -3 4 3 16.13 0.97 
 -3 4 3 14 0.82 
 -3 4 3 15.29 0.97 
 2 -4 -3 860.31 25.22 
 -2 -4 3 932.4 25.21 
 2 -4 -3 903.75 25.09 
 -2 -4 3 942.57 25 
 -2 -4 3 917.78 25.24 
 2 -4 -3 919.34 25.23 
 -2 -4 3 914.84 25.14 
 -2 4 3 1000 25.27 
 -2 4 3 892.63 25.25 
 -2 4 3 895.14 25.23 
 -2 4 3 903.81 25.09 
 2 4 -3 933.07 25.21 
 -1 -4 3 355.9 9.71 
 1 -4 -3 343.24 9.9 
 1 -4 -3 355.39 9.93 
 1 -4 -3 352.4 9.71 
 -1 -4 3 354.84 9.89 
 -1 -4 3 354.58 9.92 
 1 4 -3 354.39 9.68 
 -1 4 3 349.59 9.71 
 -1 4 3 349.29 9.9 
 -1 4 3 349.53 9.93 
 -1 4 3 365.4 9.93 
 1 4 -3 361.86 9.92 
 0 -4 -3 2.14 0.44 
 0 -4 -3 2.66 0.42 
 0 -4 -3 3.5 0.53 
 0 -4 3 2.4 0.31 
 0 -4 3 3.19 0.46 
 0 4 3 3.06 0.48 
 0 4 -3 3.13 0.49 
 0 4 3 3.13 0.43 
 0 4 3 2.65 0.41 
 0 4 -3 2.57 0.29 
 1 -4 3 4.07 0.43 
 1 -4 3 3.05 0.25 
 -1 -4 -3 4.6 0.54 
 -1 -4 -3 5.24 0.52 
 -1 -4 -3 5.33 0.57 
 -1 -4 -3 3.96 0.25 
 1 -4 3 4.38 0.54 
 1 4 3 3.56 0.4 
 1 4 3 5.64 0.59 
 1 4 3 4.14 0.46 
 -1 4 -3 5.2 0.45 
 -1 4 -3 4.19 0.54 
 1 4 3 4.16 0.25 
 -2 -4 -3 6 0.65 
 2 -4 3 5.55 0.64 
 -2 -4 -3 5.86 0.55 
 2 -4 3 6.22 0.67 
 -2 -4 -3 4.6 0.57 
 -2 -4 -3 6.02 0.39 
 2 -4 3 5.34 0.28 
 2 -4 3 6.44 0.57 
 2 4 3 5.12 0.5 
 -2 4 -3 4.72 0.48 
 2 4 3 4.27 0.54 
 -2 4 -3 4.18 0.55 
 2 4 3 5.29 0.38 
 -2 4 -3 5.01 0.29 
 2 4 3 4.63 0.56 
 2 4 3 5.43 0.43 
 3 -4 3 0.5 0.42 
 -3 -4 -3 0.08 0.37 
 -3 -4 -3 0.83 0.29 
 3 -4 3 0.41 0.47 
 -3 -4 -3 0.2 0.18 
 -3 -4 -3 1.11 0.48 
 -3 -4 -3 -0.33 0.38 
 3 4 3 0.35 0.3 
 -3 4 -3 0.69 0.34 
 -3 4 -3 0.37 0.21 
 -3 4 -3 0.19 0.49 
 3 4 3 -0.36 0.39 
 4 -4 3 1.62 0.49 
 -4 -4 -3 2.29 0.48 
 -4 -4 -3 2.56 0.43 
 -4 -4 -3 1.65 0.53 
 4 -4 3 1.96 0.54 
 4 4 3 1.52 0.4 
 -4 4 -3 1.84 0.32 
 4 4 3 1.33 0.47 
 -4 4 -3 2.34 0.5 
 -4 4 -3 0.65 0.48 
 5 -4 3 11.89 0.95 
 -5 -4 -3 11.98 0.81 
 5 -4 3 11.21 0.95 
 -5 -4 -3 11.32 0.9 
 -5 -4 -3 11.55 0.92 
 -5 4 -3 11 0.67 
 -5 4 -3 12.52 0.98 
 -5 4 -3 12.63 0.96 
 5 4 3 9.85 0.85 
 6 -4 3 25.52 1.39 
 -6 -4 -3 26.36 1.35 
 -6 -4 -3 28.14 1.31 
 6 -4 3 27.84 1.38 
 6 4 3 25.86 1.31 
 -6 4 -3 26.09 1.13 
 -6 4 -3 26.81 1.39 
 -6 4 -3 24.75 1.38 
 7 -4 3 -0.01 0.6 
 -7 -4 -3 0.7 0.51 
 -7 -4 -3 -0.35 0.46 
 7 -4 3 0.07 0.47 
 7 4 3 -0.04 0.43 
 -7 4 -3 1.04 0.63 
 -7 4 -3 0.11 0.46 
 8 -4 3 23.77 1.38 
 -8 -4 -3 24.1 1.44 
 -8 -4 -3 24.38 1.45 
 -8 4 -3 24.26 1.5 
 -8 4 -3 25.23 1.51 
 8 4 3 25.35 1.33 
 -9 -4 -3 5.08 0.84 
 9 -4 3 4.41 0.78 
 -9 -4 -3 5.3 0.87 
 -9 4 -3 3.44 0.83 
 -9 4 -3 4.98 0.84 
 9 4 3 3.59 0.68 
 10 -4 3 18.03 1.3 
 -10 -4 -3 16.68 1.46 
 -10 -4 -3 17.32 1.52 
 -10 4 -3 15.55 1.51 
 -10 4 -3 19.3 1.71 
 10 4 3 17.23 1.23 
 -11 -4 -3 9.23 1.32 
 11 -4 3 9.66 1.06 
 -11 -4 -3 10.63 1.27 
 -11 4 -3 10.93 1.4 
 -11 4 -3 6.07 1.17 
 -12 -4 -3 1.71 0.9 
 -12 -4 -3 2.34 1.05 
 -12 4 -3 1.74 1.02 
 -13 -4 -3 0.58 1.02 
 -13 -4 -3 -0.04 0.82 
 -13 4 -3 1.75 1.06 
 -14 -4 -3 0.03 0.94 
 -14 -4 -3 0.95 0.95 
 -14 4 -3 1.01 1.14 
 -14 -5 3 7.69 1.45 
 -14 -5 3 11.13 1.53 
 -14 5 3 8.09 1.59 
 -13 -5 3 -0.78 0.78 
 -13 -5 3 1 1.1 
 -13 5 3 -0.51 0.96 
 -12 -5 3 0.62 0.91 
 -12 -5 3 1.8 0.87 
 -12 5 3 3.31 1.06 
 -12 5 3 2.51 0.98 
 -11 -5 3 1.39 0.94 
 -11 -5 3 2.04 0.78 
 -11 5 3 3.05 0.99 
 -11 5 3 2.28 0.91 
 -10 -5 3 13.9 1.44 
 -10 -5 3 12.81 1.19 
 -10 5 3 14.84 1.33 
 -10 5 3 13.76 1.43 
 -10 5 3 11.3 1.27 
 -9 -5 3 -0.27 0.51 
 9 -5 -3 -0.34 0.37 
 -9 -5 3 -0.14 0.7 
 -9 5 3 0.28 0.62 
 -9 5 3 0 0.63 
 -9 5 3 0.08 0.67 
 -8 -5 3 13.54 1.01 
 8 -5 -3 11.9 1.15 
 -8 -5 3 12.22 1.15 
 8 -5 -3 9.84 0.82 
 -8 5 3 11.65 1.08 
 -8 5 3 14.18 1.26 
 -8 5 3 12.69 1.24 
 7 -5 -3 0.01 0.36 
 -7 -5 3 0.51 0.41 
 -7 -5 3 0.99 0.61 
 7 -5 -3 0.32 0.52 
 -7 -5 3 -0.16 0.18 
 -7 -5 3 0.53 0.23 
 -7 5 3 0.56 0.49 
 7 5 -3 1.71 0.57 
 -7 5 3 -0.32 0.46 
 -7 5 3 -0.02 0.55 
 -6 -5 3 49.51 2.03 
 -6 -5 3 49.37 1.6 
 -6 -5 3 47.84 1.79 
 6 -5 -3 49.77 1.84 
 -6 -5 3 49.77 1.79 
 6 -5 -3 50.05 2.01 
 -6 -5 3 52.01 1.61 
 -6 5 3 50.37 2.06 
 -6 5 3 52.48 2.09 
 6 5 -3 51.58 2.07 
 -6 5 3 51.78 2.03 
 5 -5 -3 5.7 0.74 
 -5 -5 3 5.53 0.46 
 -5 -5 3 4.85 0.54 
 -5 -5 3 6.19 0.75 
 -5 -5 3 4.69 0.48 
 -5 5 3 4.47 0.63 
 -5 5 3 5.3 0.69 
 5 5 -3 5.99 0.6 
 -5 5 3 4.57 0.73 
 -5 5 3 4.18 0.62 
 5 5 -3 7.67 0.84 
 4 -5 -3 1.99 0.52 
 4 -5 -3 2.01 0.49 
 -4 -5 3 2.26 0.43 
 -4 -5 3 2.16 0.34 
 -4 -5 3 1.66 0.35 
 -4 -5 3 2.62 0.56 
 -4 5 3 1.89 0.48 
 -4 5 3 2.21 0.55 
 4 5 -3 2.97 0.59 
 -4 5 3 2.45 0.56 
 -4 5 3 1.92 0.57 
 4 5 -3 2.42 0.46 
 -3 -5 3 36.57 1.15 
 -3 -5 3 36.66 1.15 
 -3 -5 3 37.09 1.37 
 3 -5 -3 33.82 1.4 
 -3 -5 3 35.18 1.3 
 -3 -5 3 34.27 1.4 
 3 -5 -3 34.92 1.31 
 3 5 -3 36.8 1.51 
 -3 5 3 33.79 1.45 
 -3 5 3 34.93 1.51 
 -3 5 3 34.43 1.32 
 -3 5 3 34.25 1.48 
 3 5 -3 35.64 1.37 
 -2 -5 3 70.64 2.26 
 2 -5 -3 68.2 2.34 
 -2 -5 3 72.14 2.02 
 -2 -5 3 72.33 2.31 
 2 -5 -3 69.66 2.15 
 2 -5 -3 67.87 2.31 
 -2 -5 3 70.88 2.33 
 -2 5 3 69.6 2.16 
 -2 5 3 72.73 2.35 
 -2 5 3 68.31 2.38 
 -2 5 3 73.22 2.34 
 1 -5 -3 13.82 0.81 
 1 -5 -3 14.78 0.58 
 -1 -5 3 13.93 0.53 
 1 -5 -3 14.75 0.9 
 -1 -5 3 15.36 0.83 
 -1 5 3 14.34 0.87 
 1 5 -3 14.74 0.47 
 -1 5 3 14.99 0.81 
 -1 5 3 13.89 0.88 
 -1 5 3 14.23 0.58 
 1 5 -3 14.33 0.84 
 0 -5 -3 1.7 0.49 
 0 -5 3 1.43 0.28 
 0 -5 -3 2.25 0.5 
 0 -5 3 1.55 0.43 
 0 -5 -3 2.02 0.42 
 0 -5 3 1.75 0.29 
 0 5 -3 1.42 0.25 
 0 5 -3 1.42 0.4 
 0 5 3 1.57 0.38 
 0 5 3 1.78 0.42 
 0 5 3 1.1 0.44 
 -1 -5 -3 18.16 1.01 
 1 -5 3 16.8 0.62 
 -1 -5 -3 17.86 0.97 
 1 -5 3 17.54 0.8 
 -1 -5 -3 16.34 0.86 
 1 -5 3 17.55 0.96 
 1 5 3 16.33 0.84 
 1 5 3 16.76 0.81 
 -1 5 -3 16.32 0.92 
 -1 5 -3 16.81 0.79 
 1 5 3 17.69 0.92 
 -2 -5 -3 5.6 0.75 
 -2 -5 -3 6.79 0.37 
 -2 -5 -3 5.51 0.61 
 -2 -5 -3 5.01 0.52 
 2 -5 3 5.73 0.56 
 2 -5 3 6.41 0.32 
 2 -5 3 6.31 0.67 
 2 5 3 5.43 0.41 
 -2 5 -3 6.29 0.55 
 2 5 3 5.73 0.44 
 -2 5 -3 5.85 0.36 
 -3 -5 -3 12.67 0.63 
 3 -5 3 12.72 0.56 
 3 -5 3 13.84 0.85 
 3 -5 3 12.4 0.89 
 -3 -5 -3 12.66 0.81 
 -3 -5 -3 11.95 0.91 
 -3 5 -3 12.52 0.89 
 3 5 3 12.09 0.86 
 -3 5 -3 12.43 0.55 
 3 5 3 13.11 0.67 
 -4 -5 -3 45.34 1.72 
 -4 -5 -3 44.61 1.8 
 -4 -5 -3 46.12 1.61 
 4 -5 3 47.28 1.79 
 4 -5 3 45.51 1.84 
 -4 5 -3 42.63 1.79 
 4 5 3 48.2 1.64 
 -4 5 -3 46.37 1.77 
 -4 5 -3 46.04 1.48 
 4 5 3 45.03 1.79 
 -5 -5 -3 2.31 0.47 
 5 -5 3 2.95 0.63 
 5 -5 3 2.43 0.57 
 -5 -5 -3 2.12 0.5 
 -5 -5 -3 1.48 0.55 
 -5 5 -3 2.56 0.55 
 -5 5 -3 1.42 0.58 
 5 5 3 2.25 0.56 
 -5 5 -3 1.78 0.36 
 -6 -5 -3 43.79 1.86 
 -6 -5 -3 41.1 1.76 
 6 -5 3 43.92 1.9 
 -6 -5 -3 46.78 1.78 
 6 -5 3 43.66 1.86 
 6 5 3 41.6 1.78 
 -6 5 -3 43.53 1.87 
 -6 5 -3 42.96 1.57 
 -6 5 -3 42.15 1.88 
 -7 -5 -3 5.14 0.72 
 7 -5 3 5.38 0.81 
 7 -5 3 4.85 0.77 
 -7 -5 -3 4.61 0.7 
 -7 5 -3 3.3 0.71 
 7 5 3 4.45 0.68 
 -7 5 -3 5.84 0.83 
 -8 -5 -3 8 0.93 
 8 -5 3 6.8 0.9 
 -8 -5 -3 7.37 0.9 
 -8 5 -3 7.97 1 
 -8 5 -3 8.72 1.01 
 8 5 3 9.25 0.92 
 -9 -5 -3 6.63 0.96 
 9 -5 3 5.64 0.87 
 -9 -5 -3 4.97 0.87 
 -9 5 -3 6.39 1.06 
 -9 5 -3 4.68 0.94 
 9 5 3 6.98 0.85 
 -10 -5 -3 13.53 1.28 
 -10 -5 -3 16.23 1.43 
 10 -5 3 12.59 1.2 
 10 5 3 14.21 1.15 
 -10 5 -3 11.38 1.32 
 -10 5 -3 12.87 1.33 
 11 -5 3 -0.51 0.57 
 -11 -5 -3 -0.16 0.69 
 -11 -5 -3 -0.1 0.69 
 -11 5 -3 0.2 0.8 
 -12 -5 -3 4.65 1.16 
 -12 -5 -3 5.53 1.1 
 -12 5 -3 5.79 1.28 
 -13 -5 -3 -0.13 1 
 -13 -5 -3 1.41 0.9 
 -13 5 -3 -0.16 1.03 
 -14 -5 -3 -0.21 0.97 
 -14 -6 3 9.77 1.56 
 -14 -6 3 10.73 1.49 
 -14 6 3 11.35 1.79 
 -13 -6 3 4.46 1.2 
 -13 -6 3 3.24 1.03 
 -13 6 3 3.13 1.22 
 -12 -6 3 0.58 0.78 
 -12 -6 3 0.82 1.02 
 -12 6 3 0.06 0.83 
 -11 -6 3 1.43 0.93 
 -11 -6 3 -0.16 0.65 
 -11 6 3 0.91 0.78 
 -11 6 3 0.66 0.84 
 -10 -6 3 0 0.61 
 -10 -6 3 0.26 0.82 
 10 -6 -3 -0.33 0.42 
 -10 6 3 0.58 0.73 
 -10 6 3 -0.1 0.75 
 -10 6 3 0.24 0.75 
 -9 -6 3 2.75 0.86 
 9 -6 -3 3.42 0.83 
 -9 -6 3 2.98 0.65 
 9 -6 -3 2.13 0.54 
 -9 6 3 2.04 0.78 
 -9 6 3 2.44 0.83 
 -9 6 3 2.06 0.8 
 8 -6 -3 12.47 0.93 
 8 -6 -3 14.85 1.23 
 -8 -6 3 12.47 0.99 
 -8 -6 3 13.62 0.66 
 -8 -6 3 11.49 0.61 
 -8 -6 3 14.71 1.34 
 -8 6 3 15.42 1.31 
 -8 6 3 15.4 1.33 
 -8 6 3 14.57 1.25 
 -7 -6 3 20.81 1.04 
 -7 -6 3 19.52 1.07 
 -7 -6 3 21.83 1.39 
 -7 -6 3 20.05 0.84 
 -7 -6 3 21.2 0.88 
 7 -6 -3 22.58 1.33 
 7 -6 -3 20.26 1.12 
 -7 6 3 21.13 1.31 
 7 6 -3 19.81 1.31 
 -7 6 3 20.6 1.38 
 -7 6 3 20.25 1.35 
 -6 -6 3 18.91 0.87 
 -6 -6 3 19.54 0.86 
 -6 -6 3 21.28 1 
 6 -6 -3 19.43 1.2 
 -6 -6 3 18.26 0.96 
 -6 -6 3 20.35 1.19 
 6 -6 -3 20.41 1.08 
 -6 6 3 18.11 1.16 
 6 6 -3 20.31 1.26 
 -6 6 3 19.23 1.26 
 -6 6 3 17.7 1.23 
 -5 -6 3 7.02 0.56 
 -5 -6 3 6.28 0.62 
 -5 -6 3 6.98 0.57 
 5 -6 -3 5.67 0.72 
 -5 -6 3 5.54 0.7 
 -5 6 3 5.44 0.66 
 -5 6 3 5.71 0.73 
 -5 6 3 7.1 0.8 
 5 6 -3 5.16 0.72 
 4 -6 -3 1.81 0.52 
 -4 -6 3 1.74 0.39 
 -4 -6 3 0.83 0.45 
 -4 -6 3 1.22 0.29 
 -4 -6 3 1.4 0.4 
 4 6 -3 1.34 0.53 
 -4 6 3 0.84 0.45 
 -4 6 3 1.4 0.48 
 -4 6 3 1.51 0.46 
 -3 -6 3 160.95 4.46 
 3 -6 -3 160.47 4.81 
 -3 -6 3 159.08 4.81 
 -3 -6 3 163.99 4.75 
 -3 -6 3 159.67 4.46 
 3 -6 -3 161.5 4.67 
 -3 -6 3 167.28 4.73 
 -3 6 3 154.93 4.67 
 -3 6 3 150.88 4.82 
 -3 6 3 160.07 4.89 
 3 6 -3 158.97 4.87 
 -2 -6 3 261.29 7.35 
 2 -6 -3 257.41 7.38 
 2 -6 -3 253.27 7.37 
 -2 -6 3 254.96 7.32 
 -2 -6 3 257.44 7 
 2 -6 -3 252.71 7.17 
 -2 6 3 255.94 7.18 
 2 6 -3 253.14 7.42 
 -2 6 3 255.1 7.42 
 1 -6 -3 175.93 5.17 
 1 -6 -3 167.99 5.11 
 -1 -6 3 172.39 4.84 
 1 -6 -3 174.96 5.17 
 1 -6 -3 174.48 4.88 
 -1 -6 3 178.15 5.18 
 -1 6 3 176.43 5.18 
 1 6 -3 180.06 5.22 
 -1 6 3 175 4.88 
 -1 6 3 173.65 5.24 
 0 -6 3 31.61 1.34 
 0 -6 3 32.95 1.13 
 0 -6 -3 31.15 1.26 
 0 -6 -3 33.92 1.27 
 0 -6 -3 32.83 1.34 
 0 -6 3 32.67 1.1 
 0 6 -3 32.09 1.39 
 0 6 3 31.6 1.32 
 0 6 -3 32.89 1.07 
 -1 -6 -3 1.42 0.5 
 1 -6 3 1.57 0.36 
 1 -6 3 1.67 0.53 
 -1 -6 -3 1.25 0.32 
 1 -6 3 0.94 0.24 
 -1 -6 -3 2 0.41 
 -1 6 -3 1.82 0.5 
 -1 6 -3 1.93 0.35 
 1 6 3 2.44 0.41 
 -2 -6 -3 7.29 0.73 
 2 -6 3 5.89 0.68 
 -2 -6 -3 7.55 0.6 
 2 -6 3 5.62 0.53 
 2 -6 3 6.21 0.38 
 -2 -6 -3 6.48 0.36 
 -2 6 -3 6.13 0.55 
 -2 6 -3 8.47 0.81 
 -2 6 -3 6.47 0.43 
 2 6 3 6.42 0.41 
 3 -6 3 0.68 0.46 
 -3 -6 -3 -0.25 0.47 
 -3 -6 -3 0.16 0.23 
 -3 -6 -3 0.59 0.36 
 3 -6 3 0.35 0.41 
 3 -6 3 0.58 0.25 
 -3 6 -3 0.48 0.24 
 -3 6 -3 0.28 0.37 
 -3 6 -3 -0.07 0.43 
 3 6 3 0.35 0.3 
 4 -6 3 7.06 0.53 
 4 -6 3 7.55 0.79 
 -4 -6 -3 7.37 0.65 
 -4 -6 -3 8.34 0.58 
 4 -6 3 6.84 0.76 
 -4 -6 -3 6.64 0.74 
 4 6 3 8.39 0.64 
 -4 6 -3 7.85 0.51 
 -4 6 -3 8.03 0.87 
 -5 -6 -3 23.58 1.08 
 -5 -6 -3 21.65 1.15 
 5 -6 3 22.92 1.25 
 -5 -6 -3 23.51 1.32 
 5 -6 3 23.87 1.24 
 -5 6 -3 22.65 0.96 
 -5 6 -3 20.64 1.2 
 -5 6 -3 24.64 1.36 
 6 -6 3 5.66 0.8 
 6 -6 3 4.48 0.72 
 -6 -6 -3 4.16 0.69 
 -6 -6 -3 4.88 0.64 
 -6 -6 -3 5.73 0.66 
 -6 6 -3 6.16 0.78 
 -6 6 -3 5.13 0.78 
 -6 6 -3 5.72 0.56 
 7 -6 3 1.1 0.58 
 -7 -6 -3 1.57 0.55 
 -7 -6 -3 1.24 0.52 
 -7 -6 -3 0.34 0.61 
 7 -6 3 0.21 0.56 
 -7 6 -3 1.14 0.58 
 -7 6 -3 1.07 0.65 
 -8 -6 -3 6.53 0.85 
 8 -6 3 6.67 0.91 
 -8 -6 -3 7.26 0.99 
 -8 -6 -3 7.31 0.91 
 -8 6 -3 6.56 0.97 
 -8 6 -3 6.28 0.89 
 -9 -6 -3 4.35 0.86 
 -9 -6 -3 4.78 0.85 
 9 -6 3 6.52 0.93 
 -9 6 -3 4.23 1.01 
 -9 6 -3 2.9 0.79 
 10 -6 3 12.96 1.26 
 -10 -6 -3 11.47 1.23 
 -10 -6 -3 13.45 1.34 
 -10 6 -3 13.03 1.45 
 11 -6 3 4.62 0.91 
 -11 -6 -3 3.65 1.01 
 -11 -6 -3 3.64 0.94 
 -11 6 -3 2.12 0.93 
 -12 -6 -3 3.09 1.04 
 -12 -6 -3 1.02 0.85 
 -12 6 -3 1.66 1.05 
 -13 -6 -3 -0.5 0.86 
 -13 -6 -3 0.51 0.94 
 -13 6 -3 0.69 0.98 
 -13 -7 3 3.25 1.17 
 -13 -7 3 2.83 1.01 
 -13 7 3 3.74 1.15 
 -12 -7 3 -0.29 0.99 
 -12 -7 3 0.88 0.78 
 -12 7 3 0.31 0.95 
 -11 -7 3 0.61 0.67 
 -11 -7 3 0.96 0.96 
 -11 7 3 -0.07 0.85 
 10 -7 -3 3.01 0.63 
 -10 -7 3 3.94 0.77 
 -10 -7 3 3.52 0.91 
 -10 7 3 1.4 0.85 
 -10 7 3 1.2 0.87 
 9 -7 -3 1.85 0.74 
 -9 -7 3 2.65 0.85 
 9 -7 -3 2.6 0.59 
 -9 -7 3 2.95 0.65 
 -9 7 3 2.06 0.78 
 -9 7 3 2.72 0.77 
 -8 -7 3 0.74 0.33 
 8 -7 -3 -0.1 0.45 
 -8 -7 3 0.23 0.44 
 8 -7 -3 -0.92 0.56 
 -8 -7 3 -0.42 0.26 
 -8 -7 3 0.05 0.66 
 -8 7 3 0.76 0.64 
 -8 7 3 0.1 0.57 
 8 7 -3 1.04 0.63 
 -8 7 3 -0.02 0.57 
 -7 -7 3 39.52 1.55 
 -7 -7 3 40.36 1.55 
 7 -7 -3 35.66 1.66 
 -7 -7 3 40.12 1.44 
 -7 -7 3 39.98 1.85 
 7 -7 -3 41.43 1.82 
 -7 -7 3 40.25 1.44 
 7 7 -3 35.83 1.83 
 -7 7 3 39.95 1.84 
 -7 7 3 37.44 1.84 
 -7 7 3 36.23 1.87 
 -6 -7 3 6.58 0.58 
 6 -7 -3 5.43 0.71 
 -6 -7 3 6.01 0.57 
 -6 -7 3 5.23 0.61 
 6 -7 -3 5.61 0.76 
 -6 -7 3 6.67 0.81 
 6 7 -3 6.16 0.87 
 -6 7 3 5.47 0.8 
 -6 7 3 5.42 0.73 
 -6 7 3 5.72 0.85 
 -5 -7 3 13.97 0.86 
 -5 -7 3 13.73 0.71 
 5 -7 -3 15.16 1.05 
 -5 -7 3 14.98 0.86 
 -5 -7 3 15.46 1.03 
 5 7 -3 15.63 1.07 
 -5 7 3 15.14 1.09 
 -5 7 3 14.71 1.01 
 -5 7 3 15.24 1.07 
 -4 -7 3 0.03 0.35 
 -4 -7 3 0.22 0.38 
 -4 -7 3 0.59 0.37 
 -4 -7 3 0.2 0.21 
 4 -7 -3 0.24 0.47 
 -4 7 3 0.43 0.42 
 -4 7 3 -0.4 0.45 
 -4 7 3 1.35 0.51 
 4 7 -3 -0.07 0.46 
 3 -7 -3 45.2 1.75 
 -3 -7 3 43.82 1.66 
 -3 -7 3 47.11 1.73 
 -3 -7 3 43.39 1.3 
 -3 -7 3 44.36 1.64 
 -3 -7 3 43.24 1.3 
 3 -7 -3 45.04 1.57 
 -3 7 3 43.7 1.72 
 3 7 -3 45.29 1.8 
 -3 7 3 42.37 1.79 
 -3 7 3 44.41 1.59 
 2 -7 -3 5.17 0.59 
 2 -7 -3 4.53 0.43 
 -2 -7 3 5.14 0.6 
 2 -7 -3 4.41 0.57 
 -2 -7 3 4.41 0.56 
 -2 7 3 4.33 0.42 
 2 7 -3 5.36 0.7 
 -2 7 3 4.05 0.61 
 -1 -7 3 10.21 0.78 
 -1 -7 3 10.01 0.43 
 1 -7 -3 9.23 0.47 
 1 -7 -3 9.09 0.73 
 1 -7 -3 12.52 0.9 
 -1 -7 3 9.51 0.64 
 1 7 -3 10.19 0.87 
 -1 7 3 8.95 0.49 
 -1 7 3 11.92 0.86 
 0 -7 3 5.43 0.62 
 0 -7 -3 6.87 0.7 
 0 -7 -3 4.72 0.26 
 0 -7 -3 6.39 0.58 
 0 -7 3 6.57 0.46 
 0 -7 -3 6.22 0.58 
 0 -7 3 6.01 0.47 
 0 7 -3 6.86 0.72 
 0 7 -3 5.97 0.39 
 0 7 3 5.95 0.64 
 1 -7 3 1.38 0.28 
 1 -7 3 1.42 0.36 
 -1 -7 -3 0.99 0.31 
 -1 -7 -3 1.4 0.39 
 -1 -7 -3 2.15 0.56 
 1 -7 3 1.36 0.49 
 -1 7 -3 1.86 0.6 
 -1 7 -3 1.48 0.34 
 -2 -7 -3 11.87 0.51 
 -2 -7 -3 13.38 0.68 
 2 -7 3 12.24 0.8 
 2 -7 3 12.92 0.57 
 -2 -7 -3 13.51 0.8 
 2 -7 3 11.67 0.92 
 -2 -7 -3 11.93 0.93 
 -2 7 -3 14.16 0.63 
 -2 7 -3 12.57 0.9 
 -2 7 -3 11.93 0.76 
 3 -7 3 0.33 0.51 
 3 -7 3 0.34 0.41 
 -3 -7 -3 -0.23 0.44 
 -3 -7 -3 -0.03 0.2 
 -3 -7 -3 0.35 0.35 
 3 -7 3 0.44 0.24 
 -3 7 -3 0.53 0.26 
 -3 7 -3 0.35 0.37 
 3 7 3 0.01 0.26 
 -3 7 -3 0.22 0.52 
 4 -7 3 0.79 0.48 
 4 -7 3 1.01 0.56 
 4 -7 3 0.61 0.3 
 -4 -7 -3 0.23 0.52 
 -4 -7 -3 1.11 0.31 
 -4 -7 -3 1.1 0.41 
 -4 7 -3 1.38 0.31 
 -4 7 -3 -0.09 0.16 
 4 7 3 0.5 0.34 
 -4 7 -3 1.28 0.52 
 -5 -7 -3 18.98 1.22 
 5 -7 3 20.15 0.89 
 5 -7 3 18.43 1.24 
 -5 -7 -3 19.23 0.96 
 5 -7 3 16.79 1.15 
 -5 -7 -3 18.88 1.04 
 -5 7 -3 18.49 1.23 
 -5 7 -3 17.57 1.11 
 -5 7 -3 19.03 0.86 
 -6 -7 -3 30.45 1.43 
 -6 -7 -3 31.52 1.63 
 -6 -7 -3 29.2 1.36 
 6 -7 3 29.83 1.59 
 6 -7 3 32.53 1.6 
 -6 7 -3 30.27 1.65 
 -6 7 -3 32.06 1.24 
 6 7 3 30.78 1.34 
 -6 7 -3 28.68 1.52 
 7 -7 3 5.35 0.86 
 -7 -7 -3 6.61 0.93 
 -7 -7 -3 8.02 0.81 
 7 -7 3 6.89 0.93 
 -7 -7 -3 5.41 0.75 
 -7 7 -3 7.43 1.01 
 -7 7 -3 4.85 0.78 
 -8 -7 -3 0.72 0.68 
 8 -7 3 1.14 0.64 
 -8 -7 -3 0.25 0.53 
 -8 -7 -3 1.08 0.57 
 -8 7 -3 1.14 0.75 
 -8 7 -3 1.16 0.59 
 -9 -7 -3 1.2 0.64 
 -9 -7 -3 1.18 0.74 
 9 -7 3 0.78 0.69 
 -9 -7 -3 1.56 0.71 
 -9 7 -3 1.49 0.78 
 -10 -7 -3 4 0.9 
 -10 -7 -3 3.27 0.83 
 -10 -7 -3 4.41 0.96 
 10 -7 3 2.84 0.82 
 -10 7 -3 2.77 1.07 
 11 -7 3 7.4 1.14 
 -11 -7 -3 10.36 1.37 
 -11 -7 -3 8.46 1.25 
 -11 -7 -3 7.29 1.08 
 -11 7 -3 8.65 1.29 
 -12 -7 -3 0.25 0.9 
 -12 -7 -3 -0.5 0.87 
 -12 -7 -3 0.25 0.79 
 -12 7 -3 0.23 0.91 
 -13 -7 -3 1.48 1.05 
 -13 -7 -3 1.26 0.92 
 -13 -7 -3 0.48 0.99 
 -13 7 -3 1.94 1.18 
 -13 -8 3 1.12 1.07 
 -13 -8 3 0.54 0.85 
 -13 8 3 3.08 1.11 
 -12 -8 3 1.45 1.05 
 -12 -8 3 -0.13 0.7 
 -12 8 3 1.08 1.04 
 -11 -8 3 5.87 0.94 
 -11 -8 3 8.1 1.28 
 -11 8 3 5.98 1.14 
 10 -8 -3 5.28 0.99 
 -10 -8 3 5.2 0.82 
 10 -8 -3 3.5 0.7 
 -10 -8 3 5.7 1.12 
 -10 8 3 4.11 1.05 
 -9 -8 3 5.36 0.74 
 -9 -8 3 5.31 0.98 
 9 -8 -3 5.13 0.91 
 9 -8 -3 5.43 0.8 
 -9 8 3 5.92 1.02 
 -9 8 3 7.18 1.1 
 8 -8 -3 0.3 0.52 
 -8 -8 3 0.39 0.69 
 8 -8 -3 1.24 0.68 
 -8 -8 3 0.53 0.4 
 -8 -8 3 1.36 0.49 
 -8 -8 3 0.43 0.37 
 -8 8 3 0.51 0.65 
 8 8 -3 0.89 0.69 
 -8 8 3 0.85 0.64 
 -7 -8 3 4.77 0.55 
 -7 -8 3 5.76 0.64 
 -7 -8 3 6.23 0.61 
 7 -8 -3 5.43 0.81 
 -7 -8 3 5.79 0.6 
 7 -8 -3 5.34 0.76 
 -7 -8 3 4.77 0.84 
 -7 8 3 7.36 0.94 
 7 8 -3 4.06 0.83 
 -7 8 3 4.41 0.79 
 -7 8 3 6.33 0.99 
 6 -8 -3 20.33 1.22 
 6 -8 -3 20.08 1.26 
 -6 -8 3 20.08 1.04 
 -6 -8 3 19.97 1.03 
 -6 -8 3 19.19 0.92 
 -6 -8 3 20.36 1.25 
 -6 8 3 20.49 1.3 
 -6 8 3 18.14 1.21 
 -6 8 3 19.78 1.39 
 6 8 -3 21.52 1.32 
 -5 -8 3 2.61 0.5 
 -5 -8 3 2.58 0.51 
 -5 -8 3 1.94 0.57 
 -5 -8 3 2.57 0.34 
 5 -8 -3 2.21 0.61 
 -5 8 3 1.53 0.55 
 -5 8 3 2.85 0.7 
 5 8 -3 2.6 0.64 
 -5 8 3 1.68 0.53 
 -4 -8 3 0.65 0.4 
 4 -8 -3 0.56 0.48 
 -4 -8 3 0.35 0.38 
 -4 -8 3 0.53 0.2 
 -4 -8 3 0.12 0.39 
 -4 8 3 -0.09 0.39 
 -4 8 3 0.03 0.4 
 4 8 -3 0.58 0.47 
 -4 8 3 0.02 0.46 
 3 -8 -3 15.87 0.83 
 -3 -8 3 15.81 0.97 
 -3 -8 3 15.82 0.92 
 -3 -8 3 16.43 0.93 
 3 -8 -3 18.32 1.06 
 -3 8 3 17.79 0.87 
 -3 8 3 15.29 1.13 
 3 8 -3 16.17 1.06 
 2 -8 -3 30.55 1.12 
 -2 -8 3 29.4 1.3 
 -2 -8 3 31.2 1.27 
 2 -8 -3 33.96 1.43 
 2 -8 -3 29.42 1.36 
 -2 -8 3 30.37 1.35 
 -2 8 3 30.34 1.14 
 2 8 -3 29.86 1.43 
 -2 8 3 29.69 1.33 
 -2 8 3 30.73 1.47 
 -1 -8 3 26.31 1.09 
 -1 -8 3 26.21 0.85 
 1 -8 -3 27.1 1.29 
 1 -8 -3 26.36 1.21 
 -1 -8 3 26.27 1.25 
 1 -8 -3 24.86 0.9 
 0 -8 3 37.1 1.59 
 0 -8 3 33.65 1.27 
 0 -8 -3 34.64 1.39 
 0 -8 -3 38.96 1.56 
 0 -8 -3 34.22 1.07 
 0 -8 3 34.84 1.2 
 0 8 -3 34.94 1.57 
 0 8 -3 36.04 1.13 
 -1 -8 -3 2.04 0.2 
 -1 -8 -3 1.79 0.55 
 1 -8 3 2.73 0.61 
 1 -8 3 2.39 0.34 
 1 -8 3 1.14 0.36 
 -1 -8 -3 1.89 0.2 
 -1 -8 -3 2.38 0.44 
 -1 -8 -3 1.32 0.37 
 -1 8 -3 0.9 0.51 
 -1 8 -3 1.63 0.36 
 -1 8 -3 2.27 0.36 
 2 -8 3 18.12 1.17 
 -2 -8 -3 15.47 1.01 
 -2 -8 -3 14.84 0.61 
 -2 -8 -3 16.61 0.8 
 -2 -8 -3 17.1 0.89 
 2 -8 3 15.07 0.91 
 2 -8 3 16.72 0.72 
 -2 8 -3 17.42 1.12 
 -2 8 -3 15.58 0.85 
 -2 8 -3 16.63 0.75 
 3 -8 3 1.28 0.57 
 3 -8 3 1.77 0.49 
 -3 -8 -3 1.06 0.39 
 -3 -8 -3 1.35 0.3 
 -3 -8 -3 0.99 0.57 
 -3 -8 -3 1.34 0.27 
 3 -8 3 2.52 0.32 
 -3 8 -3 1.97 0.35 
 -3 8 -3 2.18 0.45 
 -3 8 -3 2.17 0.62 
 3 8 3 1.29 0.31 
 -4 -8 -3 1.84 0.55 
 4 -8 3 1.65 0.59 
 -4 -8 -3 1.38 0.42 
 4 -8 3 1.99 0.51 
 -4 -8 -3 2.43 0.36 
 4 -8 3 2.48 0.38 
 -4 8 -3 1.59 0.34 
 4 8 3 1.84 0.39 
 -4 8 -3 1 0.53 
 -4 8 -3 1.33 0.46 
 -5 -8 -3 1.46 0.62 
 -5 -8 -3 1.37 0.37 
 5 -8 3 0.9 0.58 
 5 -8 3 2.12 0.4 
 -5 -8 -3 1.27 0.45 
 5 -8 3 1.16 0.52 
 -5 -8 -3 0.78 0.23 
 -5 8 -3 1.16 0.35 
 -5 8 -3 1.8 0.67 
 5 8 3 1.01 0.45 
 -6 -8 -3 1.1 0.47 
 -6 -8 -3 1.79 0.47 
 -6 -8 -3 2.08 0.68 
 6 -8 3 2.4 0.7 
 6 -8 3 1.7 0.65 
 -6 8 -3 1.62 0.68 
 -6 8 -3 1.68 0.39 
 6 8 3 1.97 0.52 
 -6 8 -3 0.85 0.49 
 7 -8 3 15.12 1.31 
 7 -8 3 12.61 1.18 
 -7 -8 -3 12.63 0.96 
 -7 -8 -3 12.96 1.06 
 -7 -8 -3 13.12 1.25 
 -7 8 -3 10.9 1.15 
 -7 8 -3 13.23 1.19 
 8 -8 3 -0.24 0.6 
 -8 -8 -3 -0.48 0.5 
 -8 -8 -3 1.08 0.59 
 -8 -8 -3 -0.02 0.67 
 -8 8 -3 -0.22 0.71 
 -9 -8 -3 5.61 1.01 
 -9 -8 -3 5.7 0.91 
 9 -8 3 5.02 0.94 
 -9 -8 -3 5.22 0.83 
 -9 8 -3 6.38 1.09 
 -10 -8 -3 1.73 0.88 
 10 -8 3 0.75 0.73 
 -10 -8 -3 0.26 0.64 
 -10 -8 -3 1.14 0.78 
 -10 8 -3 0.45 0.83 
 -11 -8 -3 9.42 1.25 
 11 -8 3 8.76 1.16 
 -11 -8 -3 6.8 1.09 
 -11 -8 -3 9.92 1.37 
 -11 8 -3 9.55 1.51 
 -12 -8 -3 0.76 0.82 
 -12 -8 -3 0.32 0.91 
 -12 -8 -3 -0.57 0.94 
 -12 8 -3 -2.14 0.79 
 -13 -8 -3 1.08 0.91 
 -13 -8 -3 0.39 0.92 
 -13 -8 -3 0.77 0.96 
 -13 8 -3 -0.29 1.13 
 -13 -9 3 6.09 1.36 
 -13 -9 3 6.24 1.11 
 -13 9 3 4.22 1.36 
 -12 -9 3 1.51 1.08 
 -12 -9 3 1.41 0.78 
 -12 9 3 3.2 1.05 
 -11 -9 3 0.29 0.64 
 -11 -9 3 1.2 0.96 
 -11 9 3 1.21 0.93 
 -10 -9 3 0.45 0.83 
 10 -9 -3 0.56 0.76 
 -10 -9 3 0.86 0.56 
 10 -9 -3 -0.14 0.58 
 -10 9 3 0.55 0.83 
 9 -9 -3 22.14 1.58 
 -9 -9 3 22.5 1.31 
 9 -9 -3 23.72 1.47 
 -9 -9 3 22.54 1.57 
 9 9 -3 25.27 1.65 
 -9 9 3 23.15 1.66 
 -8 -9 3 11.6 0.88 
 -8 -9 3 11.82 0.91 
 8 -9 -3 10.91 1.11 
 -8 -9 3 11.47 0.86 
 8 -9 -3 13.41 1.24 
 -8 -9 3 14.27 1.32 
 8 9 -3 10.64 1.22 
 -8 9 3 12.64 1.29 
 -8 9 3 13.26 1.27 
 -7 -9 3 23.95 1.1 
 -7 -9 3 23.37 1.17 
 7 -9 -3 23.75 1.43 
 -7 -9 3 21.93 1.15 
 -7 -9 3 25.83 1.48 
 7 -9 -3 24.54 1.48 
 -7 9 3 19.76 1.37 
 -7 9 3 22.2 1.44 
 7 9 -3 20.92 1.45 
 6 -9 -3 0.8 0.57 
 -6 -9 3 -0.26 0.45 
 -6 -9 3 0.38 0.41 
 6 -9 -3 0.35 0.54 
 -6 -9 3 -0.01 0.39 
 -6 -9 3 0.19 0.29 
 -6 9 3 -0.42 0.46 
 6 9 -3 -0.67 0.48 
 -6 9 3 -0.66 0.45 
 -5 -9 3 14.6 1.03 
 5 -9 -3 17.81 1.14 
 -5 -9 3 14.66 0.95 
 -5 -9 3 16.5 0.99 
 -5 -9 3 14.11 0.67 
 -5 9 3 16.84 1.02 
 5 9 -3 16.19 1.17 
 -5 9 3 13.75 1.08 
 4 -9 -3 0.49 0.52 
 -4 -9 3 1 0.41 
 -4 -9 3 0.58 0.42 
 -4 -9 3 1.42 0.18 
 -4 -9 3 0.87 0.42 
 4 9 -3 1.18 0.59 
 -4 9 3 1.05 0.45 
 -4 9 3 1.92 0.48 
 -3 -9 3 23.18 1.18 
 3 -9 -3 23.9 1.04 
 3 -9 -3 22.64 1.25 
 -3 -9 3 23.49 1.17 
 -3 -9 3 24.25 1.17 
 -3 -9 3 24.87 1.2 
 3 9 -3 20.98 1.23 
 -3 9 3 22.7 1.04 
 -2 -9 3 13.33 0.9 
 -2 -9 3 15.9 0.97 
 2 -9 -3 15.3 0.97 
 2 -9 -3 13.67 0.71 
 2 -9 -3 14.13 0.95 
 -2 -9 3 13.4 0.85 
 -2 9 3 13.22 0.89 
 -2 9 3 14.49 0.74 
 2 9 -3 12.24 0.94 
 1 -9 -3 0.9 0.49 
 -1 -9 3 1.29 0.2 
 1 -9 -3 1.51 0.46 
 -1 -9 3 1.1 0.37 
 -1 -9 3 1.16 0.47 
 1 -9 -3 0.38 0.23 
 -1 9 3 0.71 0.4 
 1 9 -3 1.11 0.54 
 0 -9 3 0.24 0.25 
 0 -9 -3 0.17 0.36 
 0 -9 3 0.45 0.31 
 0 -9 3 -0.06 0.41 
 0 -9 -3 0 0.15 
 0 -9 -3 0.87 0.51 
 0 9 3 0.42 0.43 
 0 9 -3 0.29 0.46 
 -1 -9 -3 5.82 0.75 
 -1 -9 -3 6.87 0.35 
 1 -9 3 5.99 0.51 
 1 -9 3 5.31 0.74 
 -1 -9 -3 6.99 0.62 
 1 -9 3 7.24 0.58 
 -1 -9 -3 5.88 0.37 
 -1 9 -3 6.7 0.53 
 1 9 3 6.96 0.72 
 -1 9 -3 5.78 0.76 
 -1 9 -3 6.58 0.56 
 -2 -9 -3 16.5 0.89 
 2 -9 3 16.54 0.91 
 2 -9 3 14.27 0.73 
 -2 -9 -3 16.07 0.64 
 2 -9 3 17.6 1.19 
 -2 -9 -3 15.94 1.11 
 -2 -9 -3 16 0.94 
 -2 9 -3 14.64 0.85 
 -2 9 -3 16.13 0.79 
 -2 9 -3 15.43 1.13 
 3 -9 3 9.72 0.58 
 -3 -9 -3 9.13 0.74 
 3 -9 3 7.4 0.87 
 -3 -9 -3 9.63 0.61 
 3 -9 3 10.53 0.85 
 -3 -9 -3 8.56 0.52 
 -3 -9 -3 11.72 1.02 
 -3 9 -3 9.64 0.78 
 -3 9 -3 10.08 0.63 
 -3 9 -3 9.38 1 
 4 -9 3 15.13 1.16 
 -4 -9 -3 15.9 0.77 
 -4 -9 -3 17.06 0.79 
 -4 -9 -3 16.13 1.2 
 -4 -9 -3 16.81 0.96 
 4 -9 3 15.34 1.05 
 4 -9 3 17.48 0.83 
 4 9 3 18.56 0.98 
 -4 9 -3 17.05 1.03 
 4 9 3 17.49 0.84 
 -4 9 -3 16.77 1.22 
 -4 9 -3 17.65 0.82 
 -5 -9 -3 24.56 1.11 
 -5 -9 -3 24.59 1.23 
 -5 -9 -3 26.28 1.51 
 5 -9 3 23.95 1.51 
 5 -9 3 25.44 1.09 
 5 -9 3 26.31 1.41 
 -5 9 -3 26.7 1.08 
 5 9 3 26.23 1.23 
 -5 9 -3 24.71 1.47 
 -5 9 -3 21.97 1.22 
 -6 -9 -3 7.38 0.7 
 -6 -9 -3 7.23 0.99 
 6 -9 3 5.91 0.87 
 6 -9 3 7.64 0.95 
 -6 -9 -3 5.99 0.7 
 6 -9 3 6.54 0.63 
 -6 9 -3 4.7 0.73 
 -6 9 -3 6.59 0.91 
 6 9 3 7.9 0.79 
 -7 -9 -3 13.65 1.01 
 -7 -9 -3 16.72 1.42 
 7 -9 3 12.98 1.26 
 -7 -9 -3 13.29 1.05 
 -7 9 -3 15.62 1.41 
 7 9 3 11.82 0.98 
 -8 -9 -3 0.09 0.55 
 8 -9 3 -0.75 0.62 
 -8 -9 -3 1.92 0.61 
 -8 -9 -3 0.58 0.68 
 -8 9 -3 0.91 0.76 
 -9 -9 -3 7 0.96 
 -9 -9 -3 5.96 0.92 
 -9 -9 -3 5.16 1.08 
 9 -9 3 7.95 1.1 
 -9 9 -3 5.63 1.18 
 10 -9 3 1.4 0.82 
 -10 -9 -3 0.64 0.86 
 -10 -9 -3 2.98 0.85 
 -10 -9 -3 1.43 0.72 
 -10 9 -3 1.47 0.87 
 11 -9 3 11.21 1.35 
 -11 -9 -3 11.74 1.49 
 -11 -9 -3 12.68 1.35 
 -11 -9 -3 12.3 1.4 
 -11 9 -3 14.95 1.71 
 -12 -9 -3 -0.72 0.89 
 -12 -9 -3 0.47 0.8 
 -12 -9 -3 -0.09 0.87 
 -12 9 -3 0.17 1.03 
 -13 -9 -3 1.59 0.99 
 -13 -9 -3 0.21 1.08 
 -13 -9 -3 1.8 0.93 
 -13 9 -3 2.3 1.29 
 -13 -10 3 3.64 1.34 
 -13 -10 3 5.53 1.04 
 -13 10 3 5.51 1.34 
 -12 -10 3 5.05 1.29 
 -12 -10 3 7.38 1.05 
 -12 10 3 5.92 1.3 
 -11 -10 3 1.61 0.66 
 -11 -10 3 2.05 0.99 
 -11 10 3 0.59 0.9 
 10 -10 -3 6.11 0.96 
 10 -10 -3 6.53 1.11 
 -10 -10 3 7.65 1.16 
 -10 -10 3 6.85 0.86 
 -10 10 3 5.81 1.15 
 -9 -10 3 1.05 0.54 
 9 -10 -3 1.41 0.78 
 -9 -10 3 0.44 0.71 
 -9 -10 3 1.02 0.78 
 9 -10 -3 1.51 0.69 
 9 10 -3 0.08 0.74 
 -9 10 3 -0.76 0.58 
 -8 -10 3 3.01 0.55 
 -8 -10 3 3.26 0.83 
 -8 -10 3 2.17 0.56 
 8 -10 -3 2.54 0.81 
 8 -10 -3 2.78 0.78 
 -8 -10 3 2.35 0.57 
 -8 10 3 1.87 0.7 
 8 10 -3 2.87 0.83 
 -7 -10 3 7.5 0.96 
 7 -10 -3 8.32 0.99 
 7 -10 -3 6.38 0.91 
 -7 -10 3 7.25 0.79 
 -7 -10 3 7.73 0.8 
 -7 -10 3 7.57 0.64 
 7 10 -3 6.96 0.99 
 -7 10 3 6.32 0.9 
 6 -10 -3 6.59 0.9 
 -6 -10 3 8.23 0.93 
 -6 -10 3 6.25 0.75 
 -6 -10 3 5.47 0.49 
 -6 -10 3 6.48 0.75 
 6 -10 -3 5.14 0.83 
 6 10 -3 7.17 0.97 
 -6 10 3 6.14 0.84 
 -6 10 3 6.18 0.83 
 5 -10 -3 1.91 0.62 
 -5 -10 3 1.52 0.51 
 -5 -10 3 1.55 0.27 
 -5 -10 3 1.61 0.5 
 -5 -10 3 1.9 0.53 
 -5 10 3 2.66 0.56 
 5 10 -3 3.33 0.73 
 -5 10 3 2.35 0.58 
 -4 -10 3 0.18 0.49 
 -4 -10 3 0.35 0.41 
 4 -10 -3 0.32 0.52 
 -4 -10 3 0.01 0.41 
 -4 -10 3 0.11 0.41 
 -4 10 3 0.17 0.41 
 -4 10 3 -0.07 0.11 
 4 10 -3 -0.07 0.52 
 -3 -10 3 0.83 0.45 
 -3 -10 3 1.12 0.49 
 -3 -10 3 0.76 0.41 
 3 -10 -3 1.18 0.38 
 3 -10 -3 1.14 0.54 
 -3 -10 3 1.1 0.45 
 -3 10 3 0.7 0.39 
 -3 10 3 1.59 0.49 
 3 10 -3 0.4 0.5 
 -2 -10 3 5.99 0.66 
 2 -10 -3 5.3 0.77 
 -2 -10 3 4.72 0.65 
 2 -10 -3 5.41 0.5 
 -2 10 3 5.55 0.65 
 2 10 -3 4.92 0.73 
 1 -10 -3 40.68 1.62 
 -1 -10 3 38.83 1.25 
 -1 -10 3 40 1.75 
 1 -10 -3 38.31 1.32 
 -1 -10 3 40.35 1.54 
 1 -10 -3 40.44 1.73 
 -1 10 3 41.15 1.73 
 -1 10 3 37.31 1.55 
 0 -10 3 41.71 1.6 
 0 -10 3 43.57 1.48 
 0 -10 -3 42.93 1.37 
 0 -10 3 46.56 1.94 
 0 -10 -3 47.77 1.89 
 0 -10 -3 42.1 1.67 
 0 10 3 46.74 1.78 
 0 10 -3 42.14 1.89 
 -1 -10 -3 6.8 0.81 
 1 -10 3 5.63 0.79 
 1 -10 3 7.39 0.58 
 1 -10 3 6.62 0.57 
 -1 -10 -3 7.38 0.39 
 -1 -10 -3 6.25 0.42 
 -1 -10 -3 6.17 0.63 
 1 10 3 8.53 0.81 
 -1 10 -3 5.31 0.83 
 -1 10 -3 7.55 0.64 
 -1 10 -3 6.57 0.54 
 2 -10 3 6.75 0.85 
 2 -10 3 6.56 0.65 
 -2 -10 -3 6.1 0.44 
 -2 -10 -3 6.88 0.84 
 -2 -10 -3 6.91 0.64 
 2 -10 3 7.42 0.57 
 -2 10 -3 7.4 0.6 
 -2 10 -3 6.24 0.59 
 2 10 3 7.68 0.76 
 -2 10 -3 7.73 0.94 
 3 -10 3 0.75 0.45 
 -3 -10 -3 0.98 0.56 
 -3 -10 -3 0.35 0.37 
 3 -10 3 0.16 0.56 
 3 -10 3 0.6 0.29 
 -3 -10 -3 0.01 0.24 
 -3 10 -3 0.52 0.33 
 -3 10 -3 1.41 0.63 
 3 10 3 0.97 0.47 
 -3 10 -3 0.27 0.37 
 -4 -10 -3 0.66 0.28 
 4 -10 3 0.66 0.56 
 4 -10 3 1.47 0.38 
 -4 -10 -3 1.15 0.42 
 -4 -10 -3 1.21 0.62 
 4 -10 3 0.59 0.45 
 -4 -10 -3 0.64 0.29 
 -4 10 -3 0.33 0.4 
 4 10 3 1.92 0.52 
 -4 10 -3 2.2 0.4 
 -4 10 -3 0.91 0.64 
 -5 -10 -3 8.12 0.57 
 -5 -10 -3 10.06 0.69 
 5 -10 3 12.17 1.08 
 5 -10 3 9.65 0.73 
 -5 -10 -3 9.5 1.08 
 -5 -10 -3 10.09 0.83 
 5 -10 3 8.48 1 
 5 10 3 12.12 0.95 
 -5 10 -3 8.29 0.96 
 -5 10 -3 11.54 0.92 
 -5 10 -3 11.43 0.72 
 -6 -10 -3 9.78 0.87 
 -6 -10 -3 10.46 0.82 
 6 -10 3 10.04 1.18 
 6 -10 3 9.68 0.77 
 6 -10 3 9.97 1.16 
 -6 -10 -3 8.94 1.03 
 -6 -10 -3 9.61 0.54 
 6 10 3 9.77 0.91 
 -6 10 -3 9.81 1.16 
 -7 -10 -3 2.37 0.57 
 7 -10 3 1.14 0.73 
 -7 -10 -3 1.52 0.57 
 -7 -10 -3 1.74 0.75 
 7 10 3 0.23 0.53 
 -7 10 -3 1.12 0.68 
 -8 -10 -3 -0.9 0.48 
 -8 -10 -3 0.35 0.76 
 -8 -10 -3 0.32 0.54 
 8 -10 3 0.65 0.76 
 -8 10 -3 0.08 0.77 
 -9 -10 -3 1.04 0.64 
 9 -10 3 -0.36 0.7 
 -9 -10 -3 1.35 0.86 
 -9 -10 -3 1.13 0.69 
 -9 10 -3 1.13 0.89 
 -10 -10 -3 0.88 0.75 
 -10 -10 -3 0.68 0.86 
 10 -10 3 0.09 0.77 
 -10 -10 -3 0.68 0.67 
 -10 10 -3 -1.45 0.79 
 -11 -10 -3 3.07 1.04 
 -11 -10 -3 3.54 0.97 
 -11 -10 -3 2.4 0.84 
 11 -10 3 4.06 1.01 
 -11 10 -3 1.18 0.98 
 -12 -10 -3 0.64 0.9 
 -12 -10 -3 -0.28 0.75 
 -12 -10 -3 1.2 1.1 
 -12 10 -3 -1.32 1.03 
 -12 -11 3 6.94 0.99 
 -12 -11 3 6.76 1.32 
 -12 11 3 6.35 1.4 
 11 -11 -3 2.5 0.95 
 -11 -11 3 1.92 0.73 
 -11 -11 3 2.03 1.05 
 -11 11 3 1.53 0.97 
 -10 -11 3 1.09 0.87 
 10 -11 -3 -0.07 0.69 
 10 -11 -3 0.81 0.81 
 -10 -11 3 1.33 0.59 
 10 11 -3 1.59 0.87 
 -10 11 3 0.88 0.82 
 -9 -11 3 20.08 1.22 
 -9 -11 3 21.85 1.62 
 9 -11 -3 20.9 1.65 
 9 -11 -3 21.14 1.56 
 9 11 -3 22.14 1.7 
 -9 11 3 20.53 1.61 
 8 -11 -3 19.59 1.54 
 -8 -11 3 16.59 1.44 
 -8 -11 3 16.83 1.02 
 -8 -11 3 17.68 1.16 
 -8 -11 3 16.87 1.08 
 8 -11 -3 14.78 1.37 
 8 11 -3 18.51 1.58 
 -8 11 3 17.59 1.41 
 7 -11 -3 3.33 0.82 
 -7 -11 3 3.48 0.65 
 7 -11 -3 4.01 0.86 
 -7 -11 3 4.26 0.72 
 -7 -11 3 4.32 0.82 
 -7 -11 3 3.52 0.49 
 7 11 -3 4.71 0.9 
 -7 11 3 4.19 0.81 
 -6 -11 3 13.05 1.15 
 -6 -11 3 16.63 1.12 
 6 -11 -3 13.59 1.19 
 -6 -11 3 13.73 0.7 
 6 -11 -3 15.45 1.27 
 -6 -11 3 14.58 1.02 
 -6 11 3 13.75 1.15 
 6 11 -3 15.61 1.28 
 -5 -11 3 0.15 0.56 
 -5 -11 3 0.06 0.17 
 -5 -11 3 -0.19 0.41 
 -5 -11 3 0.21 0.46 
 -5 -11 3 0.35 0.47 
 5 -11 -3 -0.44 0.53 
 -5 11 3 0.48 0.32 
 5 11 -3 0.32 0.59 
 -5 11 3 -0.35 0.46 
 4 -11 -3 4.11 0.74 
 -4 -11 3 6.06 0.79 
 -4 -11 3 5.68 0.74 
 -4 -11 3 5.45 0.7 
 -4 -11 3 5.98 0.75 
 4 11 -3 4.98 0.83 
 -4 11 3 5.2 0.69 
 -4 11 3 5.84 0.69 
 -3 -11 3 -0.47 0.34 
 -3 -11 3 0.57 0.44 
 -3 -11 3 0.25 0.44 
 3 -11 -3 -0.82 0.47 
 -3 -11 3 0.45 0.44 
 3 11 -3 0.17 0.51 
 -3 11 3 0.09 0.35 
 -3 11 3 0.22 0.39 
 2 -11 -3 1.25 0.6 
 -2 -11 3 1.16 0.5 
 -2 -11 3 1.2 0.45 
 2 -11 -3 0.91 0.32 
 2 11 -3 0.88 0.53 
 -2 11 3 1.3 0.41 
 1 -11 -3 7.77 0.51 
 1 -11 -3 7.67 0.75 
 -1 -11 3 8.59 0.92 
 1 -11 -3 8.88 0.92 
 -1 -11 3 8.72 0.74 
 -1 11 3 9.84 0.95 
 1 11 -3 7.22 0.87 
 -1 11 3 9.73 0.81 
 0 -11 -3 -0.16 0.51 
 0 -11 -3 0.51 0.21 
 0 -11 3 -0.06 0.52 
 0 -11 3 -0.18 0.33 
 0 -11 -3 0.3 0.37 
 0 -11 3 0.09 0.27 
 0 11 3 0.34 0.46 
 0 11 -3 -0.13 0.55 
 0 11 3 0.12 0.34 
 1 -11 3 12.77 1.16 
 -1 -11 -3 12.99 0.6 
 1 -11 3 11.99 0.77 
 -1 -11 -3 11.87 1.03 
 -1 -11 -3 13.86 0.88 
 1 -11 3 11.98 0.77 
 -1 -11 -3 13.76 0.57 
 -1 11 -3 13.41 1.21 
 1 11 3 12.47 0.97 
 2 -11 3 53.81 1.94 
 -2 -11 -3 61.13 2.36 
 -2 -11 -3 58.68 2.05 
 2 -11 3 59.31 2.47 
 -2 -11 -3 59.37 1.81 
 2 -11 3 57.21 2.06 
 -2 11 -3 56.32 2.48 
 -2 11 -3 57.26 1.99 
 2 11 3 59.81 2.18 
 -2 11 -3 56.38 2.38 
 -3 -11 -3 36.61 1.3 
 -3 -11 -3 36.61 1.76 
 3 -11 3 35.57 1.87 
 3 -11 3 36.71 1.6 
 3 -11 3 37.83 1.39 
 -3 -11 -3 40.35 1.54 
 -3 11 -3 37.06 1.44 
 -3 11 -3 36.81 1.54 
 -3 11 -3 36.68 1.81 
 3 11 3 38.14 1.6 
 4 -11 3 41.09 2.03 
 4 -11 3 39.98 1.48 
 -4 -11 -3 38.16 1.85 
 -4 -11 -3 39.23 1.43 
 4 -11 3 42.71 1.77 
 -4 -11 -3 37.79 1.59 
 -4 11 -3 40.72 1.69 
 -4 11 -3 38.42 1.95 
 -4 11 -3 40.67 1.65 
 4 11 3 37.32 1.64 
 5 -11 3 27.11 1.14 
 -5 -11 -3 23.5 1.58 
 5 -11 3 24.97 1.41 
 -5 -11 -3 21.96 1 
 -5 -11 -3 22.41 1.2 
 5 -11 3 21.57 1.56 
 -5 -11 -3 25.89 1.11 
 -5 11 -3 22.69 1.56 
 5 11 3 23.14 1.24 
 6 -11 3 25.67 1.21 
 -6 -11 -3 23.33 1.29 
 -6 -11 -3 25.02 1.22 
 6 -11 3 24.83 1.69 
 -6 -11 -3 24.94 1 
 -6 -11 -3 28.54 1.73 
 -6 11 -3 25.78 1.56 
 6 11 3 24.69 1.36 
 7 -11 3 5.8 0.7 
 -7 -11 -3 6.21 1.06 
 -7 -11 -3 6.64 0.8 
 7 -11 3 5.5 1.06 
 -7 -11 -3 8.24 0.84 
 -7 11 -3 6.22 1.09 
 7 11 3 6.84 0.87 
 -8 -11 -3 8.05 1.13 
 8 -11 3 7.3 1.11 
 -8 -11 -3 9.23 0.95 
 -8 -11 -3 8.45 0.93 
 8 11 3 9.19 1.02 
 -8 11 -3 6.25 1.13 
 -9 -11 -3 5.86 0.91 
 -9 -11 -3 5.43 1.15 
 9 -11 3 6.37 1.15 
 -9 -11 -3 4.5 0.82 
 -9 11 -3 6.06 1.23 
 -10 -11 -3 0.27 0.72 
 -10 -11 -3 0.14 0.93 
 10 -11 3 -0.34 0.77 
 -10 -11 -3 0.54 0.66 
 -10 11 -3 -0.63 0.79 
 -11 -11 -3 2.64 0.85 
 -11 -11 -3 2.28 0.9 
 -11 -11 -3 2.73 1.05 
 11 -11 3 2.61 1.02 
 -11 11 -3 5.75 1.34 
 -12 -11 -3 4.33 1.32 
 -12 -11 -3 2.32 1.06 
 -12 -11 -3 2.1 0.93 
 -12 11 -3 0.99 1.18 
 -12 -12 3 6.1 1.31 
 -12 -12 3 4.16 0.87 
 -12 12 3 2.87 1.05 
 -11 -12 3 0.04 0.88 
 11 -12 -3 -0.07 0.82 
 -11 -12 3 -0.82 0.58 
 -11 12 3 1.99 0.93 
 -10 -12 3 13.56 1.49 
 10 -12 -3 11.74 1.36 
 -10 -12 3 10.86 0.99 
 10 -12 -3 9.6 1.23 
 -10 12 3 9.93 1.37 
 10 12 -3 10.79 1.43 
 -9 -12 3 4.05 0.97 
 9 -12 -3 4.08 0.91 
 -9 -12 3 4.41 0.66 
 9 -12 -3 1.83 0.9 
 9 12 -3 2.79 0.97 
 -9 12 3 3.75 0.94 
 -8 -12 3 5.45 0.95 
 8 -12 -3 5.51 0.98 
 -8 -12 3 4.75 0.74 
 -8 -12 3 4.88 0.59 
 -8 -12 3 3.93 0.74 
 8 -12 -3 3.82 0.94 
 8 12 -3 4.58 0.98 
 -8 12 3 2.6 0.83 
 -7 -12 3 -0.15 0.52 
 7 -12 -3 0.48 0.69 
 -7 -12 3 1.69 0.82 
 -7 -12 3 1.12 0.59 
 -7 -12 3 1.19 0.59 
 7 -12 -3 1.08 0.74 
 -7 -12 3 0.54 0.34 
 -7 12 3 0.39 0.61 
 7 12 -3 1.07 0.74 
 -6 -12 3 0.23 0.51 
 -6 -12 3 0.77 0.25 
 -6 -12 3 0.19 0.48 
 6 -12 -3 0.36 0.61 
 -6 -12 3 0.91 0.68 
 -6 -12 3 0.18 0.52 
 6 -12 -3 0.7 0.64 
 -6 12 3 0.71 0.58 
 6 12 -3 -0.26 0.63 
 -5 -12 3 2.08 0.58 
 -5 -12 3 0.77 0.63 
 5 -12 -3 1.23 0.64 
 -5 -12 3 1.01 0.52 
 -5 -12 3 2.69 0.63 
 5 12 -3 2.51 0.78 
 -5 12 3 1.08 0.54 
 -4 -12 3 7.57 0.86 
 4 -12 -3 6.96 0.9 
 -4 -12 3 7.44 0.91 
 -4 -12 3 10.52 0.95 
 -4 -12 3 10.07 0.98 
 -4 12 3 9.56 0.84 
 4 12 -3 9.2 1.08 
 -3 -12 3 0.19 0.47 
 -3 -12 3 0.29 0.46 
 3 -12 -3 -0.31 0.55 
 -3 -12 3 0.79 0.46 
 -3 -12 3 0.04 0.46 
 -3 12 3 0.19 0.37 
 3 12 -3 0.2 0.6 
 2 -12 -3 29.5 1.2 
 2 -12 -3 30.27 1.57 
 -2 -12 3 29.68 1.56 
 -2 -12 3 31.53 1.42 
 2 12 -3 27.59 1.6 
 -2 12 3 30.39 1.59 
 -2 12 3 32.74 1.44 
 1 -12 -3 0.67 0.45 
 1 -12 -3 0.56 0.28 
 1 -12 -3 0.84 0.58 
 -1 -12 3 0.7 0.41 
 -1 -12 3 1.01 0.57 
 -1 12 3 0.36 0.51 
 1 12 -3 0.99 0.61 
 -1 12 3 0.41 0.36 
 0 -12 3 59.28 1.93 
 0 -12 -3 57.87 1.83 
 0 -12 -3 58.33 2.15 
 0 -12 3 58.93 2.1 
 0 -12 3 59.86 2.42 
 0 -12 -3 58.43 2.34 
 0 12 -3 57.99 2.43 
 0 12 3 55.89 2.26 
 0 12 3 60.18 2.08 
 -1 -12 -3 0.53 0.26 
 -1 -12 -3 0.08 0.55 
 1 -12 3 -0.19 0.35 
 1 -12 3 0.29 0.34 
 -1 -12 -3 1.11 0.25 
 -1 -12 -3 -0.37 0.33 
 1 -12 3 -0.12 0.5 
 -1 12 -3 0.93 0.61 
 1 12 3 1.19 0.56 
 2 -12 3 11.77 0.76 
 -2 -12 -3 10.88 0.83 
 -2 -12 -3 12.84 1.16 
 2 -12 3 9.82 1.09 
 2 -12 3 10.05 0.82 
 -2 -12 -3 11.65 0.62 
 2 12 3 11.69 0.99 
 -2 12 -3 10.69 1.13 
 3 -12 3 1.16 0.64 
 -3 -12 -3 1.92 0.46 
 3 -12 3 2.19 0.42 
 -3 -12 -3 1.53 0.34 
 3 -12 3 2.22 0.53 
 -3 -12 -3 1.11 0.66 
 -3 12 -3 2.19 0.77 
 -3 12 -3 0.75 0.42 
 3 12 3 1.77 0.57 
 4 -12 3 6.67 0.97 
 4 -12 3 6.68 0.64 
 4 -12 3 6.55 0.8 
 -4 -12 -3 6.48 0.68 
 -4 -12 -3 6.32 0.55 
 -4 -12 -3 4.95 0.83 
 -4 12 -3 5.35 0.93 
 4 12 3 6.99 0.82 
 -5 -12 -3 0.3 0.43 
 5 -12 3 1.14 0.76 
 -5 -12 -3 0.63 0.35 
 -5 -12 -3 0.02 0.69 
 5 -12 3 1.18 0.45 
 5 12 3 1.03 0.52 
 -5 12 -3 1.39 0.77 
 -6 -12 -3 21.28 1.24 
 -6 -12 -3 24.09 1.7 
 -6 -12 -3 21.65 1.05 
 -6 -12 -3 22.57 1.15 
 6 -12 3 22.52 1.16 
 6 -12 3 23.73 1.62 
 6 12 3 22.89 1.35 
 -6 12 -3 22.72 1.66 
 7 -12 3 11.41 0.94 
 -7 -12 -3 10.89 0.97 
 7 -12 3 10.4 1.31 
 -7 -12 -3 9.71 1.21 
 -7 -12 -3 12.16 0.95 
 -7 12 -3 12.34 1.38 
 7 12 3 11.24 1.1 
 -8 -12 -3 0.33 0.87 
 -8 -12 -3 0.57 0.56 
 8 -12 3 0.96 0.79 
 -8 -12 -3 0.45 0.54 
 -8 12 -3 1.28 0.79 
 8 12 3 -1.18 0.59 
 -9 -12 -3 1.21 0.66 
 -9 -12 -3 1.14 0.67 
 9 -12 3 3.02 1 
 -9 -12 -3 0.64 0.94 
 -9 12 -3 2.27 1.03 
 -10 -12 -3 0.2 0.66 
 -10 -12 -3 2.71 0.81 
 10 -12 3 -0.1 0.83 
 -10 -12 -3 1.18 0.97 
 -10 12 -3 1.18 0.9 
 -11 -12 -3 0.24 0.73 
 -11 -12 -3 -1.33 0.82 
 11 -12 3 -0.52 0.88 
 -11 12 -3 -0.56 0.86 
 -11 -13 3 3.61 1.23 
 -11 -13 3 1.59 0.97 
 11 -13 -3 2.89 1.02 
 -11 -13 3 1.37 0.68 
 -11 13 3 2.17 0.97 
 -10 -13 3 0 1.01 
 10 -13 -3 -0.26 0.82 
 -10 -13 3 0.66 0.82 
 -10 -13 3 0.75 0.56 
 10 -13 -3 -0.92 0.7 
 -10 13 3 -1.2 0.79 
 10 13 -3 -1.75 0.78 
 9 -13 -3 8.54 1.22 
 -9 -13 3 9.18 1.41 
 9 -13 -3 5.12 1.07 
 -9 -13 3 9.3 1.24 
 -9 -13 3 6.47 0.71 
 9 13 -3 6.98 1.24 
 -9 13 3 7.43 1.2 
 -8 -13 3 13.59 1.51 
 -8 -13 3 13.94 1.36 
 8 -13 -3 14.11 1.45 
 -8 -13 3 14.54 1.23 
 -8 -13 3 13.13 0.87 
 8 -13 -3 12.13 1.31 
 -8 13 3 13.99 1.39 
 8 13 -3 14.34 1.49 
 7 -13 -3 0.33 0.69 
 -7 -13 3 0.32 0.56 
 -7 -13 3 0.36 0.6 
 7 -13 -3 -0.23 0.73 
 -7 -13 3 0.22 0.58 
 -7 -13 3 1.15 0.83 
 -7 -13 3 0.56 0.31 
 -7 13 3 0.89 0.7 
 7 13 -3 0.2 0.7 
 6 -13 -3 4.11 0.94 
 6 -13 -3 5.22 0.89 
 -6 -13 3 6.53 1.07 
 -6 -13 3 5.64 0.87 
 -6 -13 3 6.06 0.81 
 -6 -13 3 5.03 0.82 
 -6 -13 3 5.24 0.34 
 -6 13 3 4.18 0.79 
 6 13 -3 6.19 0.98 
 5 -13 -3 17.25 1.31 
 -5 -13 3 19.06 1.26 
 -5 -13 3 18.57 1.21 
 -5 -13 3 15.31 1.17 
 -5 -13 3 14.59 1.3 
 5 13 -3 15.29 1.42 
 -5 13 3 16.82 1.15 
 4 -13 -3 2.38 0.71 
 -4 -13 3 1.48 0.55 
 -4 -13 3 1.5 0.61 
 -4 -13 3 1.87 0.6 
 -4 -13 3 1.66 0.59 
 4 13 -3 1.1 0.66 
 -4 13 3 1.28 0.52 
 -3 -13 3 4.82 0.75 
 3 -13 -3 4.66 0.77 
 -3 -13 3 4.58 0.73 
 -3 -13 3 5.63 0.75 
 -3 -13 3 4.3 0.74 
 3 13 -3 4.83 0.92 
 -3 13 3 4.97 0.85 
 -2 -13 3 1.22 0.6 
 -2 -13 3 2.61 0.59 
 2 -13 -3 1.97 0.66 
 2 -13 -3 1.65 0.4 
 -2 13 3 2.46 0.72 
 2 13 -3 2.09 0.67 
 1 -13 -3 -0.09 0.43 
 -1 -13 3 -0.69 0.51 
 -1 -13 3 -0.16 0.38 
 1 -13 -3 -0.57 0.24 
 1 -13 -3 0.3 0.57 
 1 13 -3 -0.03 0.59 
 -1 13 3 -0.32 0.5 
 -1 13 3 0.05 0.37 
 0 -13 -3 0.78 0.27 
 0 -13 -3 1.56 0.49 
 0 -13 3 0.88 0.43 
 0 -13 3 1.01 0.6 
 0 -13 -3 1.59 0.65 
 0 13 -3 2.26 0.73 
 0 13 3 1 0.56 
 0 13 3 0.71 0.39 
 -1 -13 -3 11 1.12 
 -1 -13 -3 11.68 0.63 
 1 -13 3 10.58 1.22 
 -1 -13 -3 12.18 0.59 
 1 -13 3 10.2 0.79 
 1 -13 3 10.34 0.81 
 -1 -13 -3 12.37 0.88 
 -1 13 -3 9.39 1.11 
 1 13 3 11.92 1.06 
 -2 -13 -3 4.49 0.43 
 2 -13 3 5.98 0.68 
 -2 -13 -3 4.15 0.59 
 -2 -13 -3 3.47 0.8 
 2 -13 3 4.37 0.92 
 2 -13 3 4.77 0.58 
 -2 -13 -3 5.04 0.46 
 2 13 3 4.79 0.78 
 -2 13 -3 4.26 0.81 
 -3 -13 -3 1.69 0.7 
 3 -13 3 1.85 0.44 
 -3 -13 -3 1.18 0.34 
 -3 -13 -3 1.3 0.45 
 3 -13 3 0.87 0.52 
 3 -13 3 -0.14 0.59 
 3 13 3 0.54 0.55 
 -3 13 -3 1.26 0.66 
 4 -13 3 43.01 2.23 
 4 -13 3 44.03 1.97 
 -4 -13 -3 43.38 1.72 
 -4 -13 -3 40.42 1.52 
 4 -13 3 43.76 1.66 
 -4 -13 -3 48.49 2.2 
 4 13 3 39.87 1.83 
 -4 13 -3 39.6 2.09 
 -5 -13 -3 1.31 0.74 
 -5 -13 -3 0.86 0.36 
 5 -13 3 0.43 0.75 
 5 -13 3 0.89 0.44 
 -5 -13 -3 0.93 0.48 
 -5 13 -3 -0.02 0.65 
 5 13 3 0.58 0.55 
 -6 -13 -3 1.37 0.76 
 -6 -13 -3 1.85 0.56 
 6 -13 3 -0.2 0.64 
 6 -13 3 1.18 0.52 
 -6 -13 -3 1.35 0.46 
 -6 13 -3 2.12 0.91 
 6 13 3 2.3 0.65 
 7 -13 3 5.56 1.1 
 -7 -13 -3 5.27 0.72 
 -7 -13 -3 5.44 1.17 
 -7 -13 -3 5.06 0.76 
 7 13 3 4.29 0.78 
 -7 13 -3 5.67 1.12 
 8 -13 3 1.81 0.97 
 -8 -13 -3 2.02 0.66 
 -8 -13 -3 2.13 0.73 
 -8 -13 -3 3.83 1.07 
 -8 13 -3 -0.56 0.84 
 -9 -13 -3 1.17 0.99 
 -9 -13 -3 0.11 0.6 
 9 -13 3 1.07 0.89 
 -9 13 -3 0.12 0.92 
 -10 -13 -3 3.03 1.19 
 10 -13 3 3 1.07 
 -10 -13 -3 3.62 0.86 
 -10 13 -3 3.27 1.2 
 -11 -13 -3 -0.78 0.7 
 11 -13 3 1.94 1.06 
 -11 -13 -3 0.91 1.01 
 -11 13 -3 -0.48 1.03 
 -11 -14 3 2.19 0.93 
 -11 -14 3 1.5 0.62 
 11 -14 -3 1.34 1.02 
 -11 -14 3 2.26 1.14 
 -11 14 3 1.06 0.96 
 11 14 -3 2.67 1.2 
 -10 -14 3 3.23 1.01 
 10 -14 -3 3.72 1.05 
 10 -14 -3 2.75 1.02 
 -10 -14 3 4.12 0.67 
 -10 -14 3 2.35 1.18 
 -10 14 3 3.29 1.03 
 10 14 -3 4.7 1.22 
 -9 -14 3 4.33 0.6 
 9 -14 -3 5.27 1.11 
 9 -14 -3 5.22 1.08 
 -9 -14 3 4.1 1.19 
 -9 -14 3 5.6 1.04 
 9 14 -3 6.9 1.27 
 -9 14 3 4.51 1.05 
 8 -14 -3 0.36 0.81 
 -8 -14 3 0.25 0.34 
 -8 -14 3 -0.38 0.62 
 -8 -14 3 0.18 0.85 
 -8 -14 3 0.66 0.65 
 8 -14 -3 1.11 0.81 
 8 14 -3 0.29 0.8 
 -8 14 3 0.22 0.74 
 7 -14 -3 0.67 0.77 
 -7 -14 3 2.03 0.94 
 -7 -14 3 0 0.59 
 7 -14 -3 1.29 0.84 
 -7 -14 3 0.13 0.22 
 -7 -14 3 -0.65 0.53 
 -7 -14 3 -0.69 0.55 
 7 14 -3 0.24 0.72 
 -7 14 3 0.04 0.62 
 6 -14 -3 -0.24 0.65 
 -6 -14 3 -0.16 0.74 
 6 -14 -3 0.04 0.7 
 -6 -14 3 -0.32 0.55 
 -6 -14 3 0.4 0.59 
 -6 -14 3 -0.59 0.46 
 6 14 -3 -0.44 0.7 
 -6 14 3 -0.16 0.57 
 5 -14 -3 -0.36 0.62 
 5 -14 -3 -0.05 0.66 
 -5 -14 3 -1.04 0.58 
 -5 -14 3 0.16 0.52 
 -5 -14 3 0.46 0.58 
 -5 -14 3 -0.59 0.51 
 -5 14 3 0.61 0.55 
 5 14 -3 -1.27 0.63 
 4 -14 -3 2.16 0.72 
 -4 -14 3 1.86 0.67 
 -4 -14 3 1.17 0.55 
 -4 -14 3 0.73 0.55 
 -4 -14 3 -0.09 0.48 
 4 14 -3 -0.31 0.64 
 3 -14 -3 33.91 1.77 
 -3 -14 3 36.75 1.76 
 -3 -14 3 31.93 1.6 
 -3 -14 3 34.98 1.72 
 -3 -14 3 33.14 1.77 
 3 14 -3 33.59 1.87 
 -3 14 3 31.87 1.84 
 -2 -14 3 8.53 0.9 
 -2 -14 3 9.2 1.1 
 -2 -14 3 9.18 0.91 
 2 -14 -3 9.91 1.08 
 2 14 -3 7.78 1.07 
 -2 14 3 7.88 0.99 
 -1 -14 3 6.73 0.78 
 -1 -14 3 4.68 0.9 
 1 -14 -3 6.47 0.9 
 -1 14 3 7.05 0.96 
 1 14 -3 9.09 1.14 
 0 -14 -3 21.16 1.26 
 0 -14 -3 25.81 1.54 
 0 -14 3 24.61 1.26 
 0 -14 3 24.26 1.62 
 0 14 -3 22.76 1.58 
 0 14 3 23.6 1.5 
 -1 -14 -3 1.44 0.68 
 1 -14 3 1.39 0.49 
 1 -14 3 -0.08 0.66 
 1 -14 3 0.68 0.42 
 -1 -14 -3 1.11 0.48 
 -1 -14 -3 1.36 0.33 
 1 14 3 1.19 0.65 
 -1 14 -3 0.57 0.74 
 -2 -14 -3 0.41 0.42 
 -2 -14 -3 0.91 0.34 
 2 -14 3 1.21 0.45 
 2 -14 3 0.36 0.72 
 -2 -14 -3 0.73 0.67 
 2 -14 3 0.66 0.47 
 -2 14 -3 0.88 0.76 
 2 14 3 0.71 0.62 
 -3 -14 -3 0.96 0.73 
 3 -14 3 -0.23 0.44 
 3 -14 3 -0.23 0.7 
 -3 -14 -3 0.06 0.41 
 -3 -14 -3 -0.08 0.3 
 3 -14 3 0.36 0.4 
 3 14 3 0.73 0.58 
 -3 14 -3 0.77 0.74 
 -4 -14 -3 15.75 1.42 
 -4 -14 -3 14.73 0.91 
 4 -14 3 16.21 0.99 
 4 -14 3 12.06 1.34 
 -4 -14 -3 16.42 1.05 
 4 14 3 15.63 1.2 
 -4 14 -3 14.95 1.54 
 -5 -14 -3 0.35 0.71 
 -5 -14 -3 0.54 0.48 
 5 -14 3 0.83 0.46 
 5 -14 3 -0.27 0.74 
 -5 14 -3 0.84 0.76 
 5 14 3 1.46 0.61 
 -6 -14 -3 11.1 1.34 
 -6 -14 -3 8.57 0.85 
 6 -14 3 7.25 1.2 
 6 14 3 8.24 0.97 
 -6 14 -3 7.73 1.33 
 -7 -14 -3 25.92 2.06 
 -7 -14 -3 25.03 1.42 
 7 -14 3 23.77 1.92 
 -7 14 -3 24.7 1.99 
 7 14 3 25.67 1.56 
 -8 -14 -3 0.96 0.98 
 -8 -14 -3 0.01 0.56 
 8 -14 3 -0.07 0.89 
 -8 14 -3 0.93 1.02 
 -9 -14 -3 7.82 1.38 
 9 -14 3 5.91 1.25 
 -9 -14 -3 8.92 1.01 
 -9 14 -3 6.8 1.35 
 -10 -14 -3 -0.02 1.01 
 -10 -14 -3 1.56 0.71 
 10 -14 3 1.07 0.93 
 -10 14 -3 -1.92 0.9 
 -10 -15 3 1.45 0.89 
 -10 -15 3 -0.49 0.99 
 -10 -15 3 0.32 0.46 
 10 -15 -3 0.14 0.87 
 10 -15 -3 -0.46 0.87 
 10 15 -3 0.03 0.97 
 -10 15 3 0.69 0.85 
 -9 -15 3 -0.15 1.03 
 9 -15 -3 2.19 0.95 
 -9 -15 3 0.98 0.41 
 9 -15 -3 1 0.93 
 -9 -15 3 0.08 0.74 
 -9 15 3 2.33 0.89 
 9 15 -3 1.99 1.05 
 -8 -15 3 5.38 0.45 
 -8 -15 3 4.69 1.16 
 -8 -15 3 4.23 1.25 
 8 -15 -3 3.76 1.09 
 8 -15 -3 6.56 1.08 
 -8 -15 3 3.28 0.89 
 8 15 -3 3.26 1.02 
 -8 15 3 3.62 0.9 
 -7 -15 3 4.96 1.13 
 7 -15 -3 5.74 1.06 
 7 -15 -3 4.04 1.03 
 -7 -15 3 7.7 1.04 
 -7 -15 3 5.95 0.92 
 -7 -15 3 4.42 0.88 
 7 15 -3 5.99 1.15 
 -7 15 3 3.32 0.87 
 6 -15 -3 5.41 1.11 
 -6 -15 3 6.83 1.13 
 -6 -15 3 5.39 0.88 
 -6 -15 3 6.93 0.98 
 -6 -15 3 5.77 0.93 
 6 -15 -3 6.15 1.03 
 6 15 -3 5.25 1.07 
 -6 15 3 6 0.9 
 5 -15 -3 6.61 1.01 
 -5 -15 3 7.51 1.07 
 -5 -15 3 7.26 0.95 
 5 -15 -3 6.48 1.13 
 -5 -15 3 6.61 0.96 
 -5 -15 3 7.14 0.99 
 5 15 -3 5.55 1.06 
 4 -15 -3 1.81 0.79 
 -4 -15 3 1.29 0.58 
 -4 -15 3 2.49 0.73 
 -4 -15 3 0.9 0.64 
 -4 -15 3 1.67 0.71 
 -4 15 3 1.85 0.84 
 4 15 -3 2.53 0.86 
 -3 -15 3 12.5 1.14 
 -3 -15 3 9.9 1.1 
 3 -15 -3 9.67 1.15 
 -3 -15 3 11.56 1.22 
 -3 -15 3 12.52 1.09 
 3 15 -3 12.7 1.37 
 -3 15 3 11.86 1.34 
 -2 -15 3 4.75 0.74 
 -2 -15 3 3.94 0.9 
 2 -15 -3 3.15 0.84 
 -2 -15 3 3.42 0.68 
 2 15 -3 4.16 0.95 
 -2 15 3 4.42 0.9 
 1 -15 -3 2.59 0.78 
 -1 -15 3 2.42 0.63 
 -1 -15 3 2.9 0.89 
 -1 15 3 3.94 0.86 
 1 15 -3 2.56 0.86 
 0 -15 3 11.25 1.26 
 0 -15 -3 10.22 0.96 
 0 -15 -3 12.87 1.23 
 0 -15 -3 13.05 0.95 
 0 -15 3 11.73 1 
 0 15 -3 14.88 1.48 
 0 15 3 12.93 1.26 
 1 -15 3 2.01 0.53 
 -1 -15 -3 1.4 0.52 
 1 -15 3 2.4 0.8 
 -1 -15 -3 2.41 0.78 
 1 15 3 3.43 0.79 
 -1 15 -3 2.52 0.93 
 -2 -15 -3 0.68 0.44 
 2 -15 3 -0.16 0.75 
 -2 -15 -3 0.72 0.72 
 2 -15 3 0.86 0.44 
 2 -15 3 -0.1 0.46 
 2 15 3 0.5 0.63 
 -2 15 -3 -0.1 0.82 
 3 -15 3 1.1 0.84 
 3 -15 3 3.56 0.59 
 -3 -15 -3 1.64 0.53 
 -3 -15 -3 1.57 0.8 
 -3 15 -3 2.13 0.97 
 3 15 3 3.86 0.8 
 -4 -15 -3 11.81 0.96 
 -4 -15 -3 12.38 1.38 
 4 -15 3 10.78 0.89 
 4 -15 3 10.65 1.43 
 4 15 3 10.36 1.1 
 -4 15 -3 9.77 1.31 
 -5 -15 -3 1.29 0.51 
 5 -15 3 0.87 0.8 
 -5 -15 -3 1.28 0.84 
 5 -15 3 2.64 0.92 
 -5 15 -3 2.38 0.98 
 5 15 3 1.4 0.65 
 -6 -15 -3 -0.84 0.77 
 6 -15 3 -0.09 0.82 
 -6 -15 -3 0.74 0.52 
 6 15 3 -0.56 0.54 
 -6 15 -3 -0.16 0.82 
 -7 -15 -3 2.81 0.67 
 7 -15 3 2.46 1.04 
 -7 -15 -3 2.2 1.07 
 -7 15 -3 2.13 1.07 
 -8 -15 -3 0.52 0.97 
 -8 -15 -3 0.38 0.59 
 8 -15 3 1.04 0.99 
 -8 15 -3 1.36 1.12 
 -9 -15 -3 3.72 1.16 
 9 -15 3 3.13 1.09 
 -9 -15 -3 4.49 0.84 
 -9 15 -3 2.11 1.2 
 -10 -15 -3 2.2 0.77 
 -10 -15 -3 1.6 1.15 
 10 -15 3 0.98 1.08 
 -10 15 -3 2.48 1.17 
 -10 15 -3 3.18 1.26 
 -9 -16 3 1.69 0.76 
 -9 -16 3 1.73 0.36 
 9 -16 -3 2.88 1.02 
 9 -16 -3 0.57 0.96 
 -9 -16 3 1.9 0.36 
 -9 -16 3 1.02 1.04 
 9 16 -3 1.26 1 
 8 -16 -3 0.28 0.85 
 -8 -16 3 -0.14 0.99 
 8 -16 -3 0.11 0.88 
 -8 -16 3 -0.29 0.62 
 8 16 -3 0.29 0.89 
 -7 -16 3 1.89 0.8 
 7 -16 -3 0.64 0.9 
 -7 -16 3 1.04 0.68 
 -7 -16 3 1.56 1.02 
 7 -16 -3 0.54 0.83 
 7 16 -3 0.29 0.81 
 -6 -16 3 7.62 1.21 
 6 -16 -3 6.69 1.25 
 6 -16 -3 4.56 1.02 
 -6 -16 3 4.76 0.9 
 -6 -16 3 4.42 0.87 
 -6 -16 3 5 0.93 
 6 16 -3 4.98 1.09 
 5 -16 -3 1.76 0.81 
 5 -16 -3 1.64 0.94 
 -5 -16 3 2.5 0.83 
 -5 -16 3 2.8 0.7 
 -5 -16 3 1.75 0.69 
 -5 -16 3 2.38 0.75 
 -5 16 3 2.6 0.99 
 5 16 -3 0.82 0.84 
 4 -16 -3 0.07 0.74 
 -4 -16 3 1.07 0.7 
 -4 -16 3 -0.54 0.49 
 -4 -16 3 0.74 0.65 
 -4 -16 3 -0.77 0.53 
 4 16 -3 1.44 0.84 
 -4 16 3 -0.45 0.71 
 -3 -16 3 5.19 0.85 
 -3 -16 3 4.74 0.95 
 -3 -16 3 5.77 0.84 
 3 -16 -3 7.2 1.04 
 -3 -16 3 5.18 0.93 
 -3 16 3 5.87 1.04 
 3 16 -3 4.57 1.03 
 -2 -16 3 -0.09 0.49 
 -2 -16 3 -0.1 0.53 
 -2 -16 3 0.84 0.66 
 2 -16 -3 0.18 0.72 
 2 16 -3 0.19 0.73 
 -2 16 3 0.43 0.72 
 -1 -16 3 9.02 1.23 
 -1 -16 3 9.99 1.01 
 1 -16 -3 9.34 1.16 
 1 16 -3 10.08 1.26 
 -1 16 3 10.59 1.28 
 0 -16 3 -0.46 0.45 
 0 -16 3 0.06 0.68 
 0 -16 -3 -0.32 0.67 
 0 16 3 1.09 0.7 
 0 16 -3 -0.75 0.69 
 -1 -16 -3 0.58 0.78 
 1 -16 3 0.04 0.42 
 1 -16 3 -0.53 0.73 
 -1 -16 -3 0.03 0.44 
 1 16 3 -0.4 0.67 
 -1 16 -3 -0.02 0.72 
 2 -16 3 -0.95 0.65 
 -2 -16 -3 -0.21 0.44 
 2 -16 3 1.09 0.53 
 -2 -16 -3 0.41 0.75 
 2 16 3 0.79 0.7 
 -2 16 -3 0.15 0.86 
 3 -16 3 1.2 0.51 
 -3 -16 -3 0.83 0.46 
 -3 -16 -3 0.9 0.81 
 3 -16 3 -0.71 0.8 
 -3 16 -3 -0.23 0.81 
 3 16 3 0.14 0.62 
 -4 -16 -3 0.62 0.81 
 4 -16 3 2.12 0.72 
 4 -16 3 1.49 0.93 
 -4 -16 -3 1.73 0.53 
 -4 16 -3 0.63 0.94 
 4 16 3 1.94 0.74 
 -5 -16 -3 2.03 0.98 
 -5 -16 -3 2.65 0.62 
 5 -16 3 2.22 1.02 
 -5 16 -3 3.67 1.15 
 5 16 3 2.77 0.77 
 -6 -16 -3 1.25 0.95 
 6 -16 3 -0.5 0.9 
 -6 -16 -3 -0.18 0.5 
 6 16 3 0.97 0.65 
 -6 16 -3 0.32 0.95 
 7 -16 3 3.25 1.08 
 -7 -16 -3 4.49 0.76 
 -7 -16 -3 3.72 1.16 
 -7 16 -3 3.38 1.21 
 8 -16 3 10.49 1.58 
 -8 -16 -3 9.94 1.52 
 -8 -16 -3 11.3 1.07 
 -8 16 -3 9.85 1.64 
 -9 -16 -3 19.57 1.43 
 -9 -16 -3 18.67 1.94 
 9 -16 3 17.77 1.98 
 -9 16 -3 19.39 2.15 
 9 -17 -3 -1.34 0.84 
 9 -17 -3 0.7 0.97 
 -9 -17 3 2.25 1.12 
 9 17 -3 -0.06 0.85 
 -8 -17 3 1.38 1.01 
 -8 -17 3 -0.37 0.69 
 8 -17 -3 -1.06 0.8 
 8 -17 -3 0.71 1.01 
 8 17 -3 -0.48 0.82 
 -7 -17 3 3.01 1.12 
 -7 -17 3 2.99 0.89 
 7 -17 -3 2.59 0.98 
 -7 -17 3 2.82 0.83 
 7 -17 -3 2.87 1.1 
 7 17 -3 3.24 1.04 
 -6 -17 3 -0.16 0.72 
 -6 -17 3 0.16 0.63 
 6 -17 -3 -0.17 0.91 
 -6 -17 3 -0.08 0.86 
 6 -17 -3 0.96 0.83 
 -6 -17 3 -0.51 0.64 
 -6 17 3 -1.15 0.86 
 6 17 -3 0.17 0.81 
 5 -17 -3 14.15 1.68 
 -5 -17 3 17.57 1.45 
 -5 -17 3 14.02 1.45 
 5 -17 -3 16.79 1.51 
 -5 -17 3 14.94 1.38 
 -5 -17 3 15.71 1.49 
 5 17 -3 14.02 1.55 
 -5 17 3 15.07 1.67 
 -4 -17 3 6.11 0.97 
 -4 -17 3 6.51 0.95 
 -4 -17 3 5.61 1.05 
 4 -17 -3 5.53 1.06 
 -4 -17 3 6.72 1.03 
 4 17 -3 8 1.31 
 -4 17 3 7.68 1.23 
 -3 -17 3 1.51 0.8 
 -3 -17 3 2.28 0.76 
 3 -17 -3 3.08 0.92 
 -3 -17 3 1.45 0.75 
 -3 -17 3 2.48 0.72 
 3 17 -3 1.03 0.88 
 -3 17 3 0.75 0.8 
 -2 -17 3 2.33 0.93 
 -2 -17 3 3.34 0.76 
 -2 -17 3 2.6 0.73 
 2 -17 -3 4.33 0.96 
 2 17 -3 1.47 0.87 
 -2 17 3 3.07 0.92 
 1 -17 -3 1.65 0.83 
 -1 -17 3 1.31 0.79 
 -1 -17 3 1.44 0.61 
 -1 17 3 2.56 0.9 
 1 17 -3 1.25 0.88 
 0 -17 3 8.89 0.97 
 0 -17 3 7.93 1.19 
 0 -17 -3 8.16 1.18 
 0 17 3 9.4 1.22 
 0 17 -3 8.86 1.28 
 -1 -17 -3 0.69 0.53 
 1 -17 3 0.6 0.86 
 1 -17 3 -0.11 0.48 
 -1 -17 -3 1.61 0.8 
 1 17 3 0.55 0.71 
 -1 17 -3 0.33 0.87 
 -2 -17 -3 0.1 0.5 
 2 -17 3 0.13 0.5 
 -2 -17 -3 -0.35 0.75 
 2 -17 3 0.39 0.93 
 2 17 3 -0.54 0.65 
 -2 17 -3 0.43 0.86 
 3 -17 3 1.43 0.61 
 -3 -17 -3 0.71 0.84 
 -3 -17 -3 1.58 0.57 
 3 -17 3 0.84 0.85 
 3 17 3 1.95 0.77 
 -3 17 -3 0.33 0.89 
 -4 -17 -3 0.75 0.89 
 -4 -17 -3 0.53 0.51 
 4 -17 3 -0.03 0.91 
 -4 17 -3 -0.34 0.86 
 4 17 3 -0.79 0.6 
 5 -17 3 5.07 1.27 
 -5 -17 -3 6.18 1.25 
 -5 -17 -3 6.25 0.77 
 -5 17 -3 5.44 1.29 
 5 17 3 3.17 0.85 
 6 -17 3 3.11 1.08 
 -6 -17 -3 2.23 0.64 
 -6 -17 -3 4.7 1.16 
 -6 17 -3 2.72 1.17 
 7 -17 3 3.16 1.26 
 -7 -17 -3 3.09 0.69 
 -7 -17 -3 2.21 1.09 
 -7 17 -3 2.83 1.22 
 -8 -17 -3 2.11 0.7 
 8 -17 3 0.58 1.08 
 -8 -17 -3 3.02 1.21 
 -8 17 -3 6.1 1.43 
 8 -18 -3 1.95 1.15 
 -8 -18 3 0.97 1.03 
 8 -18 -3 -0.39 0.91 
 8 18 -3 1.91 1.05 
 -7 -18 3 7.29 1.15 
 7 -18 -3 7.28 1.45 
 7 -18 -3 8.96 1.29 
 -7 -18 3 6.69 1.28 
 7 18 -3 5.8 1.25 
 -7 18 3 5.01 1.31 
 -6 -18 3 -0.48 0.67 
 -6 -18 3 0.67 0.85 
 6 -18 -3 2.3 1.11 
 6 -18 -3 0.23 0.82 
 6 18 -3 1.14 0.93 
 -6 18 3 1.26 1.05 
 -5 -18 3 1.8 0.82 
 -5 -18 3 1.55 0.77 
 5 -18 -3 1.26 1.02 
 -5 -18 3 1.83 0.82 
 -5 -18 3 0.95 0.7 
 5 -18 -3 3.08 0.99 
 5 18 -3 1.01 0.89 
 -5 18 3 1.23 1.01 
 4 -18 -3 4.28 1.09 
 -4 -18 3 2.7 0.85 
 -4 -18 3 2.34 0.83 
 -4 -18 3 2.67 0.88 
 -4 -18 3 2.74 0.79 
 4 -18 -3 2.69 0.98 
 4 18 -3 3.17 1.06 
 -4 18 3 3.13 1.03 
 -3 -18 3 13.61 1.49 
 -3 -18 3 13.14 1.39 
 -3 -18 3 12.63 1.26 
 3 -18 -3 13.18 1.39 
 -3 -18 3 14.73 1.36 
 -3 18 3 10.98 1.43 
 3 18 -3 10.48 1.46 
 -2 -18 3 2.21 0.73 
 -2 -18 3 2.23 0.72 
 2 -18 -3 1.95 0.91 
 -2 -18 3 0.63 0.74 
 -2 18 3 0.51 0.85 
 2 18 -3 0.84 0.91 
 1 -18 -3 1.13 0.82 
 -1 -18 3 0.06 0.57 
 -1 -18 3 0.31 0.89 
 -1 18 3 0.08 0.79 
 1 18 -3 0.03 0.85 
 0 -18 -3 1.73 0.92 
 0 -18 3 0.97 0.97 
 0 -18 3 0.8 0.62 
 0 18 3 0.55 0.72 
 0 18 -3 1.37 0.91 
 1 -18 3 2.14 0.65 
 -1 -18 -3 2.12 0.93 
 1 -18 3 1.87 1.05 
 -1 18 -3 3.45 1.17 
 1 18 3 4.48 0.99 
 2 -18 3 1.72 0.77 
 -2 -18 -3 1.01 0.58 
 -2 -18 -3 2.11 0.95 
 2 -18 3 1.64 1.07 
 2 18 3 1.57 0.82 
 -2 18 -3 2.26 1 
 -3 -18 -3 4.05 0.72 
 -3 -18 -3 6.39 1.2 
 3 -18 3 5.8 1.28 
 -3 18 -3 5.51 1.26 
 3 18 3 4.79 0.98 
 4 -18 3 -0.56 0.76 
 -4 -18 -3 0.89 0.96 
 -4 -18 -3 -0.19 0.5 
 -4 18 -3 -0.29 0.98 
 4 18 3 1.03 0.74 
 5 -18 3 0.63 1.03 
 -5 -18 -3 1.97 0.6 
 -5 -18 -3 1.21 1.03 
 5 18 3 1.39 0.75 
 -5 18 -3 1.8 1.14 
 6 -18 3 2.33 1.11 
 -6 -18 -3 2.15 1.08 
 -6 -18 -3 4.25 0.71 
 -6 18 -3 1.94 1.21 
 7 -18 3 1.51 1.2 
 -7 -18 -3 1.46 0.63 
 -7 -18 -3 3.33 1.19 
 -7 18 -3 3.02 1.36 
 -7 -19 3 0.69 1.03 
 -7 -19 3 2.92 0.91 
 7 -19 -3 0.53 1 
 7 -19 -3 0.29 0.88 
 -7 19 3 -1.21 1.07 
 7 19 -3 0.7 1 
 -6 -19 3 4.91 1.16 
 -6 -19 3 5.5 1.14 
 6 -19 -3 4.49 1.1 
 6 -19 -3 4.47 1.34 
 -6 19 3 7.5 1.47 
 6 19 -3 6.15 1.33 
 -5 -19 3 -0.27 0.7 
 -5 -19 3 -0.18 0.72 
 5 -19 -3 0.67 1.08 
 5 -19 -3 0.05 0.84 
 -5 -19 3 -0.29 0.72 
 -5 19 3 1.34 0.98 
 5 19 -3 0.86 0.94 
 -4 -19 3 2.78 0.95 
 -4 -19 3 3.68 0.93 
 -4 -19 3 2.12 0.87 
 4 -19 -3 1.86 0.99 
 4 -19 -3 2.25 1.13 
 -4 19 3 3.16 1.19 
 4 19 -3 1.44 1 
 -3 -19 3 0.57 0.71 
 -3 -19 3 -0.68 0.6 
 3 -19 -3 -0.14 0.85 
 -3 -19 3 1.18 0.79 
 3 19 -3 0.25 0.94 
 -3 19 3 0.72 0.95 
 -2 -19 3 0.53 0.71 
 2 -19 -3 -0.06 0.83 
 -2 -19 3 0.78 0.68 
 -2 -19 3 0.77 0.92 
 -2 19 3 0.39 0.85 
 2 19 -3 0.42 0.92 
 -1 -19 3 1.83 0.71 
 1 -19 -3 1.4 0.91 
 -1 -19 3 2.73 1.01 
 -1 19 3 2.19 1 
 1 19 -3 1.59 1.08 
 0 -19 3 4.46 1.25 
 0 -19 -3 3.81 1.01 
 0 -19 3 3.91 0.79 
 0 19 -3 3.73 1.13 
 0 19 3 5.5 1.1 
 1 -19 3 1 1.03 
 1 -19 3 -0.43 0.93 
 -1 -19 -3 0.08 0.85 
 1 19 3 -0.26 0.8 
 -1 19 -3 -0.36 0.98 
 -2 -19 -3 14.66 1.59 
 2 -19 3 16.25 1.87 
 2 19 3 15.07 1.55 
 -2 19 -3 12.96 1.75 
 -3 -19 -3 1.98 1.03 
 -3 -19 -3 0.23 0.55 
 3 -19 3 0.52 1 
 -3 19 -3 -0.3 0.91 
 3 19 3 1.04 0.86 
 -4 -19 -3 3.17 0.69 
 -4 -19 -3 3.27 1.08 
 4 -19 3 4.59 1.29 
 4 19 3 3.23 0.94 
 -4 19 -3 4.78 1.36 
 5 -19 3 0.61 1.04 
 -5 -19 -3 0.9 1.06 
 -5 -19 -3 0.84 0.55 
 -5 19 -3 1.72 1.19 
 5 19 3 -0.38 0.77 
 -6 -19 -3 3.53 0.7 
 -6 -19 -3 5.39 1.35 
 6 -19 3 3.75 1.26 
 -6 19 -3 3.83 1.35 
 -5 -20 3 2.65 0.95 
 5 -20 -3 0.93 1.1 
 -5 -20 3 2.77 0.91 
 5 -20 -3 2.58 1.06 
 5 20 -3 0.56 1.01 
 -5 20 3 1.1 1.07 
 4 -20 -3 1.38 1.14 
 -4 -20 3 2.91 0.9 
 -4 -20 3 2.22 0.92 
 -4 -20 3 1.65 0.94 
 4 -20 -3 0.98 1 
 4 20 -3 0.49 0.99 
 -4 20 3 1.68 1.13 
 3 -20 -3 1.45 0.98 
 -3 -20 3 -0.54 0.72 
 -3 -20 3 0.14 0.72 
 -3 -20 3 -0.14 0.85 
 3 -20 -3 0.86 1.06 
 -3 20 3 0.51 0.96 
 3 20 -3 1.19 1.03 
 -2 -20 3 1 1.01 
 2 -20 -3 2.96 1.02 
 -2 -20 3 3.12 0.87 
 2 20 -3 2.45 1.16 
 -2 20 3 1.52 1.08 
 -1 -20 3 1.16 0.72 
 -1 -20 3 1.34 1.09 
 1 -20 -3 1.03 0.93 
 1 20 -3 3.56 1.22 
 -1 20 3 0.84 0.93 
 0 -20 3 7.54 1.44 
 0 -20 -3 8.09 1.32 
 0 20 3 9.11 1.36 
 0 20 -3 7.84 1.48 
 -1 -20 -3 2.01 1.01 
 1 -20 3 1.02 1.1 
 -1 20 -3 0.31 1.04 
 1 20 3 1.21 0.89 
 2 -20 3 1.57 1.12 
 -2 -20 -3 0.51 0.92 
 -2 20 -3 0.24 1.1 
 2 20 3 -0.48 0.78 
 3 -20 3 3.78 1.28 
 -3 -20 -3 4.92 1.22 
 3 20 3 3.41 1.01 
 -3 20 -3 3.52 1.26 
 -4 -20 -3 0.12 0.99 
 -4 -20 -3 -0.29 0.53 
 4 -20 3 0.41 1.12 
 4 20 3 0.65 0.8 
 -4 20 -3 -1.28 1 
 -5 -20 -3 0.15 0.53 
 5 -20 3 -0.42 1.03 
 -5 -20 -3 0.29 1.05 
 -5 20 -3 -2.01 0.98 
 3 -21 -3 1.34 1.03 
 3 -21 -3 1.6 1.26 
 -3 -21 3 0.73 0.8 
 -3 -21 3 2.04 0.9 
 -3 -21 3 2.79 1.12 
 3 21 -3 0.28 1.12 
 -3 21 3 2.61 1.19 
 2 -21 -3 -0.53 0.88 
 -2 -21 3 -0.38 1 
 -2 -21 3 1.09 0.79 
 2 -21 -3 0.16 1.09 
 2 21 -3 1.67 1.23 
 -2 21 3 -0.4 0.95 
 -1 -21 3 1.33 1.14 
 1 -21 -3 0.78 1.01 
 1 21 -3 0.25 1.06 
 -1 21 3 1.01 0.95 
 0 -21 3 1.24 1.17 
 0 -21 -3 1.23 1.02 
 0 21 3 -0.24 0.96 
 0 21 -3 1.07 1.19 
 1 -21 3 7.74 1.61 
 -1 -21 -3 9.67 1.47 
 -1 21 -3 7.35 1.5 
 1 21 3 7.93 1.35 
 -2 -21 -3 3.56 1.21 
 2 -21 3 2.12 1.2 
 2 21 3 3.16 1.08 
 -2 21 -3 2.09 1.25 
 3 -21 3 -0.06 1.06 
 -3 -21 -3 4.91 1.28 
 3 21 3 3.09 1.01 
 -3 21 -3 2.54 1.2 
 -14 0 4 10.18 1.54 
 -14 0 4 10.19 1.56 
 -13 0 4 -1.17 0.84 
 -13 0 4 0.27 0.93 
 -12 0 4 12.29 1.56 
 -12 0 4 14.45 1.28 
 -12 0 4 13.67 1.53 
 -11 0 4 0.05 0.59 
 -11 0 4 -0.12 0.74 
 -11 0 4 -0.35 0.74 
 -10 0 4 4.71 0.8 
 -10 0 4 4.87 0.91 
 -10 0 4 4.71 0.99 
 -9 0 4 0.34 0.59 
 -9 0 4 -0.57 0.47 
 -9 0 4 0.34 0.59 
 -8 0 4 56.86 2.43 
 -8 0 4 60.67 2.4 
 -7 0 4 0.3 0.57 
 -7 0 4 -0.68 0.42 
 -6 0 4 2.64 0.57 
 -6 0 4 4.26 0.67 
 -5 0 4 0.68 0.47 
 -5 0 4 -0.01 0.42 
 -5 0 4 -0.54 0.39 
 -4 0 4 58.33 2.07 
 4 0 -4 57.12 2.06 
 -4 0 4 59.98 2.05 
 -4 0 4 57.95 2.05 
 4 0 -4 60.46 2.07 
 4 0 -4 58.59 1.73 
 -3 0 4 -0.27 0.36 
 -3 0 4 -0.32 0.4 
 -3 0 4 0.19 0.37 
 -3 0 4 -0.03 0.22 
 3 0 -4 0.21 0.43 
 3 0 -4 0.36 0.43 
 3 0 -4 -0.08 0.23 
 3 0 -4 0.27 0.42 
 -2 0 4 135.25 3.94 
 2 0 -4 132.5 3.97 
 -2 0 4 129.3 3.96 
 2 0 -4 134.65 3.94 
 -2 0 4 129.68 3.94 
 2 0 -4 131.61 3.84 
 2 0 -4 130.79 3.93 
 -2 0 4 140.96 3.94 
 -2 0 4 135.79 3.84 
 -1 0 4 -0.28 0.36 
 1 0 -4 0.3 0.32 
 1 0 -4 0.11 0.32 
 -1 0 4 0.25 0.31 
 -1 0 4 0 0.29 
 -1 0 4 0.46 0.3 
 1 0 -4 0.51 0.39 
 1 0 -4 -0.06 0.24 
 0 0 4 7.57 0.55 
 0 0 4 7.14 0.58 
 0 0 4 7.36 0.57 
 0 0 -4 8.21 0.6 
 0 0 4 7.44 0.5 
 0 0 -4 7.16 0.49 
 0 0 -4 6.28 0.54 
 0 0 -4 7.21 0.54 
 -1 0 -4 0.21 0.39 
 1 0 4 0.38 0.32 
 -1 0 -4 0.03 0.35 
 1 0 4 0.26 0.37 
 1 0 4 0.1 0.33 
 1 0 4 -0.13 0.33 
 1 0 4 -0.05 0.25 
 -1 0 -4 0.13 0.31 
 -1 0 -4 0.12 0.26 
 -2 0 -4 37.02 1.28 
 2 0 4 38.81 1.41 
 -2 0 -4 39.95 1.47 
 -2 0 -4 39.39 1.41 
 2 0 4 37.81 1.32 
 2 0 4 37.79 1.51 
 -2 0 -4 38.26 1.31 
 2 0 4 41 1.48 
 2 0 4 38.14 1.28 
 -2 0 -4 39.31 1.47 
 -3 0 -4 -0.01 0.3 
 3 0 4 -0.07 0.45 
 -3 0 -4 -0.04 0.36 
 -3 0 -4 0.26 0.42 
 3 0 4 0.4 0.44 
 3 0 4 -0.2 0.4 
 -3 0 -4 0.12 0.41 
 3 0 4 0.07 0.3 
 -4 0 -4 135.56 4.15 
 4 0 4 139.3 4.22 
 4 0 4 131.41 3.94 
 -4 0 -4 141.52 4.03 
 -4 0 -4 131.45 4.2 
 4 0 4 139.49 4.21 
 5 0 4 0.63 0.51 
 5 0 4 -0.16 0.45 
 -5 0 -4 0.17 0.48 
 -5 0 -4 0.3 0.45 
 -6 0 -4 56.12 2.16 
 -6 0 -4 57.18 2.22 
 6 0 4 58.12 1.85 
 6 0 4 55.14 2.12 
 -7 0 -4 -0.27 0.48 
 -7 0 -4 0.7 0.52 
 7 0 4 0.16 0.28 
 7 0 4 0.22 0.47 
 -8 0 -4 6.34 0.89 
 8 0 4 6.45 0.56 
 -8 0 -4 7.36 0.94 
 8 0 4 5.95 0.78 
 -9 0 -4 -0.01 0.69 
 9 0 4 0.44 0.53 
 -9 0 -4 -0.3 0.59 
 -10 0 -4 10.71 1.24 
 10 0 4 10.3 1.04 
 -10 0 -4 11.46 1.24 
 -11 0 -4 -0.8 0.72 
 -11 0 -4 -1.24 0.65 
 11 0 4 0.12 0.6 
 -12 0 -4 2.13 1.04 
 -12 0 -4 3.33 1.05 
 -13 0 -4 -1.13 0.84 
 -13 0 -4 -0.98 0.83 
 -14 0 -4 2.51 1.14 
 -14 -1 4 1.94 1.16 
 -14 -1 4 1.69 1.03 
 -14 1 4 1.86 1.14 
 -14 1 4 1.19 1.05 
 -13 -1 4 0 0.94 
 -13 -1 4 0.13 1.07 
 -13 1 4 -0.05 0.97 
 -13 1 4 1.42 0.82 
 -13 1 4 1.89 1.13 
 -12 -1 4 4.26 1.05 
 -12 -1 4 2.14 0.73 
 -12 -1 4 2.11 0.96 
 -12 1 4 3.16 1.05 
 -12 1 4 2.08 0.75 
 -12 1 4 1.92 1.07 
 -11 -1 4 4.73 1.01 
 -11 -1 4 5.55 0.85 
 -11 -1 4 4.41 1.04 
 -11 1 4 3.89 0.81 
 -11 1 4 4.23 1 
 -11 1 4 4.5 1.11 
 -10 -1 4 13.96 1.29 
 -10 -1 4 10.15 1.21 
 -10 -1 4 12.29 1.07 
 -10 1 4 14.23 1.21 
 -10 1 4 13.3 1.29 
 -10 1 4 13.25 1.32 
 -9 -1 4 2.25 0.73 
 -9 -1 4 0.87 0.66 
 -9 1 4 2.18 0.62 
 -9 1 4 1.54 0.71 
 -9 1 4 2.4 0.8 
 -8 -1 4 21.85 1.41 
 -8 -1 4 24.69 1.38 
 -8 1 4 19.52 1.36 
 -8 1 4 25.9 1.49 
 -8 1 4 25.19 1.32 
 -7 -1 4 2.52 0.58 
 -7 -1 4 2.29 0.69 
 -7 1 4 1.8 0.59 
 -7 1 4 2.89 0.67 
 6 -1 -4 1.41 0.21 
 -6 -1 4 2.23 0.57 
 -6 -1 4 1.56 0.49 
 6 -1 -4 1.13 0.2 
 -6 1 4 0.68 0.55 
 -6 1 4 2.2 0.58 
 5 -1 -4 14.69 0.6 
 -5 -1 4 14.89 0.93 
 -5 -1 4 15.72 1 
 -5 1 4 15.43 1.01 
 -5 1 4 14.51 0.97 
 -5 1 4 15.2 1.01 
 4 -1 -4 0.62 0.41 
 -4 -1 4 -0.23 0.39 
 4 -1 -4 0.58 0.24 
 -4 -1 4 -0.13 0.36 
 -4 -1 4 0.55 0.4 
 -4 -1 4 1.06 0.17 
 4 1 -4 0.13 0.17 
 -4 1 4 0.36 0.42 
 -4 1 4 0.26 0.42 
 -4 1 4 0.42 0.41 
 4 1 -4 0.53 0.41 
 3 -1 -4 10.14 0.76 
 -3 -1 4 9.96 0.75 
 -3 -1 4 10.68 0.71 
 3 -1 -4 11.06 0.75 
 -3 -1 4 10.88 0.75 
 3 -1 -4 9.43 0.58 
 -3 -1 4 9.97 0.72 
 3 -1 -4 10.54 0.75 
 3 -1 -4 10.14 0.75 
 -3 -1 4 9.96 0.48 
 -3 1 4 10.21 0.78 
 -3 1 4 9.51 0.75 
 3 1 -4 10.12 0.72 
 3 1 -4 10.52 0.7 
 3 1 -4 10.48 0.74 
 3 1 -4 10.51 0.52 
 -3 1 4 10.22 0.79 
 2 -1 -4 71.64 2.36 
 -2 -1 4 74.56 2.23 
 -2 -1 4 73.6 2.3 
 2 -1 -4 77.1 2.33 
 2 -1 -4 75.86 2.42 
 2 -1 -4 74.6 2.28 
 2 -1 -4 72.15 2.36 
 -2 -1 4 70.34 2.32 
 -2 -1 4 76.46 2.39 
 -2 -1 4 74.52 2.37 
 -2 1 4 75.11 2.37 
 2 1 -4 74.91 2.3 
 -2 1 4 74.31 2.33 
 2 1 -4 73.44 2.37 
 2 1 -4 75.95 2.25 
 -2 1 4 74.83 2.28 
 -2 1 4 75.53 2.37 
 2 1 -4 72.19 2.33 
 1 -1 -4 165.71 4.76 
 -1 -1 4 166.33 4.69 
 -1 -1 4 162 4.71 
 -1 -1 4 163.74 4.79 
 1 -1 -4 162.42 4.73 
 -1 -1 4 168.23 4.73 
 1 -1 -4 167.14 4.79 
 1 -1 -4 162.25 4.77 
 -1 1 4 165.08 4.7 
 -1 1 4 170.47 4.77 
 1 1 -4 165.75 4.73 
 -1 1 4 166.09 4.79 
 1 1 -4 157.86 4.7 
 1 1 -4 165.8 4.79 
 -1 1 4 166.24 4.75 
 -1 1 4 159.76 4.72 
 1 1 -4 166.33 4.69 
 0 -1 -4 0.29 0.35 
 0 -1 4 0.25 0.34 
 0 -1 4 0.27 0.3 
 0 -1 4 0.43 0.23 
 0 -1 -4 0.79 0.41 
 0 -1 -4 -0.08 0.29 
 0 -1 4 -0.05 0.35 
 0 -1 -4 0.16 0.33 
 0 1 -4 0 0.05 
 0 1 -4 0.51 0.38 
 0 1 4 0.34 0.32 
 0 1 4 0.17 0.34 
 0 1 -4 0.15 0.33 
 0 1 4 0.44 0.35 
 0 1 4 0.35 0.3 
 0 1 -4 0.09 0.25 
 -1 -1 -4 1.94 0.48 
 -1 -1 -4 0.83 0.33 
 -1 -1 -4 1.59 0.41 
 1 -1 4 1.25 0.24 
 1 -1 4 1.92 0.46 
 1 -1 4 0.81 0.38 
 -1 -1 -4 1.37 0.33 
 1 -1 4 0.99 0.36 
 1 1 4 1.37 0.41 
 -1 1 -4 1.1 0.24 
 1 1 4 1.24 0.35 
 1 1 4 2.07 0.49 
 1 1 4 1.07 0.31 
 1 1 4 0.99 0.32 
 -1 1 -4 1.42 0.34 
 -1 1 -4 1.53 0.44 
 -1 1 -4 1.13 0.36 
 2 -1 4 31.4 1.19 
 2 -1 4 32.11 1.32 
 -2 -1 -4 30.95 1.3 
 2 -1 4 31.04 1.29 
 2 -1 4 33.39 1.28 
 -2 -1 -4 32.89 1.13 
 -2 -1 -4 32.04 1.18 
 -2 -1 -4 32.41 1.22 
 -2 1 -4 32.61 1.29 
 2 1 4 31.62 1.19 
 2 1 4 33.14 1.28 
 2 1 4 33.02 1.12 
 -2 1 -4 31.6 1.29 
 2 1 4 31.44 1.36 
 -2 1 -4 32.07 1.06 
 -2 1 -4 32.95 1.34 
 2 1 4 34.3 1.19 
 -3 -1 -4 0.53 0.4 
 -3 -1 -4 0.64 0.45 
 3 -1 4 0.33 0.34 
 3 -1 4 0.82 0.42 
 -3 -1 -4 0.15 0.39 
 3 -1 4 0.57 0.42 
 -3 -1 -4 0.56 0.35 
 3 -1 4 0.89 0.46 
 3 1 4 0.55 0.26 
 -3 1 -4 0.9 0.43 
 -3 1 -4 0.3 0.43 
 3 1 4 1.15 0.45 
 -3 1 -4 0.45 0.44 
 -3 1 -4 0.84 0.3 
 3 1 4 1.32 0.42 
 3 1 4 1.28 0.49 
 4 -1 4 6.02 0.69 
 -4 -1 -4 5.53 0.68 
 -4 -1 -4 5.05 0.55 
 -4 -1 -4 4.45 0.57 
 4 -1 4 6.62 0.72 
 4 1 4 5.43 0.66 
 -4 1 -4 4.72 0.63 
 -4 1 -4 6.45 0.71 
 4 1 4 5.84 0.44 
 4 1 4 6.4 0.71 
 5 -1 4 50.56 1.96 
 -5 -1 -4 54.69 2.02 
 -5 -1 -4 51.23 1.94 
 5 -1 4 51.66 1.97 
 -5 1 -4 49.97 1.96 
 5 1 4 52.31 1.6 
 -5 1 -4 49.88 1.97 
 5 1 4 47.41 1.93 
 6 -1 4 3.02 0.59 
 -6 -1 -4 3.16 0.63 
 -6 -1 -4 3.07 0.6 
 -6 1 -4 3.07 0.66 
 6 1 4 3.1 0.6 
 6 1 4 3.2 0.36 
 -6 1 -4 3.85 0.65 
 6 1 4 2.9 0.34 
 7 -1 4 0.14 0.32 
 -7 -1 -4 -0.29 0.56 
 7 -1 4 0.76 0.49 
 -7 -1 -4 0.28 0.53 
 7 1 4 0.27 0.25 
 -7 1 -4 -0.16 0.53 
 7 1 4 0.07 0.47 
 -7 1 -4 0.85 0.53 
 8 -1 4 29.34 1.47 
 -8 -1 -4 27.28 1.57 
 -8 -1 -4 27.76 1.59 
 -8 1 -4 26.81 1.6 
 8 1 4 30.65 1.48 
 -8 1 -4 26.11 1.54 
 -9 -1 -4 1.38 0.73 
 9 -1 4 2.12 0.64 
 -9 -1 -4 2.01 0.71 
 9 1 4 2.78 0.67 
 -9 1 -4 2.37 0.73 
 -9 1 -4 2.46 0.83 
 -10 -1 -4 2.52 0.93 
 10 -1 4 2.65 0.73 
 -10 -1 -4 1.34 0.73 
 -10 1 -4 0.81 0.83 
 10 1 4 1.78 0.67 
 -10 1 -4 0.72 0.8 
 11 -1 4 1.59 0.68 
 -11 -1 -4 2.16 0.91 
 -11 -1 -4 1.46 0.93 
 -11 1 -4 1.27 0.89 
 -11 1 -4 3.31 1 
 11 1 4 3.15 0.76 
 -12 -1 -4 5.47 1.23 
 -12 -1 -4 4.63 1.1 
 -12 1 -4 6.91 1.24 
 -12 1 -4 5.65 1.15 
 -13 -1 -4 0.58 0.96 
 -13 -1 -4 -0.6 0.99 
 -13 1 -4 -1.9 0.88 
 -13 1 -4 1.98 1.03 
 -14 -1 -4 1.55 1.09 
 -14 -1 -4 0.65 1.18 
 -14 1 -4 2.87 1.28 
 -14 -2 4 0.26 1.1 
 -14 -2 4 1.11 1 
 -14 2 4 0.87 1.01 
 -14 2 4 -0.14 1.12 
 -13 -2 4 5.64 1.35 
 -13 -2 4 3.22 1.09 
 -13 2 4 3.84 0.92 
 -13 2 4 2.36 1.07 
 -13 2 4 3.74 1.16 
 -12 -2 4 18.25 1.36 
 -12 -2 4 19.17 1.68 
 -12 -2 4 20.45 1.88 
 -12 2 4 21.36 1.92 
 -12 2 4 14.27 1.38 
 -12 2 4 19.57 1.75 
 -11 -2 4 2.25 0.85 
 -11 -2 4 1.47 0.6 
 -11 -2 4 1.1 0.92 
 -11 2 4 0.66 0.83 
 -11 2 4 2 0.85 
 -11 2 4 0.8 0.66 
 -10 -2 4 0.42 0.51 
 -10 -2 4 0.77 0.68 
 -10 -2 4 -1.05 0.61 
 -10 2 4 0.97 0.64 
 -10 2 4 0.63 0.7 
 -10 2 4 -0.33 0.67 
 -9 -2 4 3.86 0.86 
 9 -2 -4 4.13 0.34 
 -9 -2 4 4.43 0.79 
 -9 2 4 4.2 0.84 
 -9 2 4 2.87 0.69 
 -9 2 4 3.24 0.82 
 -8 -2 4 20.52 1.27 
 8 -2 -4 21.57 0.81 
 -8 -2 4 19.12 1.34 
 -8 2 4 21.54 1.43 
 -8 2 4 21.89 1.43 
 -8 2 4 22.85 1.34 
 7 -2 -4 8.03 0.49 
 -7 -2 4 10.56 0.92 
 -7 -2 4 6.91 0.87 
 -7 2 4 7.4 0.83 
 -7 2 4 7.94 0.85 
 -7 2 4 8.36 0.89 
 -6 -2 4 17.25 1.04 
 6 -2 -4 18.17 0.74 
 6 -2 -4 16.94 0.73 
 6 -2 -4 19.11 1.18 
 -6 -2 4 15.76 1.17 
 -6 2 4 17.57 1.12 
 -6 2 4 17.16 1.15 
 -6 2 4 18.67 1.17 
 -5 -2 4 1.41 0.51 
 5 -2 -4 1.34 0.53 
 5 -2 -4 1.83 0.31 
 -5 -2 4 1.85 0.44 
 -5 2 4 1.52 0.52 
 -5 2 4 1.72 0.52 
 -5 2 4 1.81 0.56 
 4 -2 -4 0.09 0.27 
 -4 -2 4 0.38 0.36 
 4 -2 -4 0.35 0.42 
 -4 -2 4 0.33 0.42 
 -4 -2 4 0.75 0.38 
 -4 -2 4 0.15 0.16 
 -4 -2 4 0.17 0.35 
 4 2 -4 0.54 0.46 
 -4 2 4 0.23 0.46 
 4 2 -4 0.56 0.18 
 4 2 -4 0.5 0.4 
 -4 2 4 0.59 0.46 
 -4 2 4 0.97 0.51 
 -3 -2 4 0.87 0.39 
 -3 -2 4 1.14 0.24 
 -3 -2 4 0.86 0.34 
 -3 -2 4 1.19 0.48 
 3 -2 -4 1.2 0.34 
 3 -2 -4 1.18 0.46 
 3 -2 -4 1.09 0.47 
 3 -2 -4 0.66 0.41 
 -3 -2 4 1.12 0.41 
 -3 2 4 1.23 0.41 
 -3 2 4 1.32 0.44 
 3 2 -4 1.45 0.44 
 3 2 -4 1.35 0.28 
 3 2 -4 1.28 0.48 
 -3 2 4 1.64 0.46 
 -2 -2 4 81.81 2.42 
 -2 -2 4 81.54 2.54 
 2 -2 -4 78.78 2.44 
 -2 -2 4 80.8 2.47 
 -2 -2 4 78.88 2.39 
 2 -2 -4 78.86 2.51 
 2 -2 -4 75.64 2.52 
 2 -2 -4 83.45 2.48 
 -2 -2 4 75.84 2.52 
 -2 2 4 79.63 2.46 
 2 2 -4 82.54 2.42 
 -2 2 4 78.19 2.44 
 2 2 -4 80.49 2.54 
 2 2 -4 77.89 2.41 
 -2 2 4 79.6 2.51 
 -2 2 4 79.94 2.54 
 1 -2 -4 133.91 3.97 
 1 -2 -4 136.52 4 
 1 -2 -4 140.02 4.02 
 -1 -2 4 128.19 3.98 
 1 -2 -4 123.71 3.97 
 -1 -2 4 137.94 3.9 
 -1 -2 4 135.56 3.94 
 -1 -2 4 135.03 3.88 
 1 2 -4 134.39 3.88 
 -1 2 4 136.91 3.87 
 -1 2 4 138.94 3.99 
 -1 2 4 137.71 4 
 1 2 -4 136.83 4.01 
 1 2 -4 132.01 3.88 
 -1 2 4 136.06 3.99 
 1 2 -4 138.46 3.97 
 0 -2 4 10.04 0.63 
 0 -2 -4 9.03 0.66 
 0 -2 -4 9.09 0.69 
 0 -2 -4 10.28 0.67 
 0 -2 4 9.76 0.47 
 0 -2 -4 9.32 0.65 
 0 -2 4 9.01 0.68 
 0 -2 4 11.09 0.69 
 0 2 -4 10.16 0.7 
 0 2 4 9.75 0.71 
 0 2 -4 9.63 0.62 
 0 2 -4 10.49 0.5 
 0 2 4 10.19 0.72 
 0 2 -4 11.5 0.74 
 0 2 4 9.43 0.65 
 -1 -2 -4 4.69 0.52 
 -1 -2 -4 6.28 0.53 
 -1 -2 -4 6.59 0.53 
 -1 -2 -4 7.61 0.68 
 1 -2 4 6.8 0.59 
 1 -2 4 6.46 0.56 
 1 -2 4 6.75 0.63 
 1 -2 4 6.05 0.32 
 1 2 4 6.64 0.46 
 -1 2 -4 6.11 0.32 
 1 2 4 7.25 0.52 
 1 2 4 7.51 0.57 
 1 2 4 5.33 0.53 
 1 2 4 6.14 0.64 
 -1 2 -4 7.17 0.62 
 -2 -2 -4 7.25 0.62 
 2 -2 4 8.08 0.66 
 -2 -2 -4 7.37 0.56 
 2 -2 4 8.27 0.65 
 -2 -2 -4 8.5 0.7 
 2 -2 4 7.4 0.64 
 2 -2 4 8.29 0.73 
 -2 -2 -4 7.93 0.63 
 -2 -2 -4 7.53 0.49 
 2 2 4 6.91 0.5 
 -2 2 -4 7.93 0.39 
 2 2 4 7.95 0.63 
 -2 2 -4 7.99 0.62 
 2 2 4 7.89 0.68 
 2 2 4 7.14 0.55 
 -2 2 -4 8.74 0.71 
 2 2 4 8.77 0.63 
 -3 -2 -4 72.71 2.39 
 -3 -2 -4 69.5 2.06 
 3 -2 4 69.21 2.38 
 -3 -2 -4 69.3 2.27 
 -3 -2 -4 70.99 2.24 
 -3 -2 -4 69.95 2.35 
 3 -2 4 69.17 2.35 
 3 2 4 70.3 2.24 
 3 2 4 69.61 2.37 
 -3 2 -4 70.5 2.35 
 3 2 4 68.98 2.07 
 -3 2 -4 71.57 2.54 
 -3 2 -4 66.5 2.34 
 3 2 4 70.65 2.34 
 -3 2 -4 69.48 2.07 
 -4 -2 -4 82.74 2.68 
 -4 -2 -4 83.2 2.76 
 -4 -2 -4 82.88 2.67 
 4 -2 4 82.98 2.81 
 4 -2 4 84.83 2.79 
 4 2 4 87.49 2.68 
 -4 2 -4 77.17 2.73 
 4 2 4 85.89 2.93 
 4 2 4 79.57 2.39 
 -4 2 -4 85 2.79 
 4 2 4 81.46 2.78 
 5 -2 4 67.54 2.36 
 -5 -2 -4 67.69 2.27 
 -5 -2 -4 61.62 2.3 
 -5 -2 -4 63.92 2.22 
 5 -2 4 64 2.33 
 5 2 4 63.05 1.86 
 5 2 4 61.1 2.29 
 -5 2 -4 64.83 2.33 
 -5 2 -4 60.5 2.29 
 6 -2 4 32.8 1.58 
 -6 -2 -4 30.57 1.45 
 -6 -2 -4 32.45 1.55 
 6 -2 4 28.15 1.48 
 6 2 4 34.9 1.05 
 6 2 4 30.32 1.51 
 6 2 4 33.16 1.04 
 -6 2 -4 36.19 1.62 
 -6 2 -4 34.62 1.62 
 -7 -2 -4 5.15 0.78 
 -7 -2 -4 4.19 0.72 
 7 -2 4 5.47 0.75 
 -7 2 -4 6.09 0.86 
 7 2 4 4.7 0.35 
 7 2 4 4.26 0.68 
 -7 2 -4 4.04 0.78 
 -8 -2 -4 10.23 1.08 
 -8 -2 -4 10.61 1.04 
 8 -2 4 11.18 1.03 
 8 2 4 10.81 0.5 
 8 2 4 10.45 0.99 
 -8 2 -4 12.28 1.22 
 -8 2 -4 13.15 1.21 
 -9 -2 -4 0.24 0.64 
 -9 -2 -4 1.47 0.75 
 9 -2 4 1.73 0.63 
 -9 2 -4 0.75 0.69 
 -9 2 -4 0.64 0.75 
 9 2 4 0.81 0.56 
 -10 -2 -4 19.74 1.64 
 10 -2 4 18.5 1.36 
 -10 -2 -4 21.17 1.57 
 -10 2 -4 20.49 1.64 
 -10 2 -4 17.08 1.54 
 10 2 4 19.27 1.33 
 -11 -2 -4 -0.59 0.7 
 11 -2 4 0.31 0.65 
 -11 -2 -4 -0.08 0.71 
 11 2 4 0.23 0.57 
 -11 2 -4 0.15 0.81 
 -11 2 -4 0.18 0.89 
 -12 -2 -4 2 1 
 -12 -2 -4 0.13 0.84 
 -12 2 -4 0.75 0.88 
 -12 2 -4 0.86 1.02 
 -13 -2 -4 2.01 1.02 
 -13 -2 -4 4.07 1.11 
 -13 2 -4 4.11 1.29 
 -14 -2 -4 1.54 1.16 
 -14 -2 -4 0.03 0.94 
 -14 2 -4 0.37 1.18 
 -14 -3 4 0.62 0.97 
 -14 -3 4 0.01 1.03 
 -14 3 4 1.34 1.08 
 -14 3 4 1.04 1.2 
 -13 -3 4 6.2 1.41 
 -13 -3 4 4.72 1.16 
 -13 3 4 6.23 1.08 
 -13 3 4 4 1.17 
 -13 3 4 7.95 1.35 
 -12 -3 4 8.28 1.22 
 -12 -3 4 12.43 1.57 
 -12 3 4 8.95 1.27 
 -12 3 4 7.95 1.29 
 -12 3 4 8.95 1.15 
 -11 -3 4 2.73 0.85 
 -11 -3 4 1.82 0.62 
 -11 -3 4 1.16 0.84 
 -11 3 4 2.29 0.78 
 -11 3 4 2.83 0.96 
 -11 3 4 0.14 0.83 
 -10 -3 4 0.56 0.71 
 -10 -3 4 0.26 0.65 
 -10 3 4 0.13 0.68 
 -10 3 4 -0.68 0.59 
 -10 3 4 1.21 0.73 
 -9 -3 4 12.44 1.32 
 9 -3 -4 9.63 0.62 
 -9 -3 4 10.13 1.04 
 -9 3 4 10.24 1.16 
 -9 3 4 10.37 1.21 
 -9 3 4 9.36 1.06 
 8 -3 -4 0.45 0.29 
 -8 -3 4 0.55 0.62 
 -8 -3 4 1.01 0.54 
 -8 3 4 0.45 0.61 
 -8 3 4 0.41 0.54 
 -8 3 4 0.36 0.61 
 7 -3 -4 8.93 0.6 
 -7 -3 4 8.99 0.84 
 -7 -3 4 7.43 0.9 
 7 -3 -4 11.11 1.06 
 -7 3 4 8.09 0.87 
 -7 3 4 9.79 0.99 
 -7 3 4 10.46 1.02 
 -6 -3 4 7.36 0.83 
 6 -3 -4 7.95 0.81 
 -6 -3 4 7.34 0.7 
 6 -3 -4 6.91 0.56 
 -6 3 4 8.16 0.87 
 -6 3 4 7.2 0.79 
 -6 3 4 8.43 0.82 
 -6 3 4 6.83 0.81 
 -5 -3 4 22.63 1.05 
 -5 -3 4 21.16 0.71 
 5 -3 -4 22.51 1.23 
 -5 -3 4 22.52 1.2 
 -5 -3 4 21.03 1.06 
 5 3 -4 21.66 1.22 
 -5 3 4 21.23 1.17 
 -5 3 4 19.24 1.15 
 -5 3 4 21.6 1.22 
 -5 3 4 24.36 1.23 
 4 -3 -4 2.66 0.56 
 4 -3 -4 2.6 0.53 
 -4 -3 4 3.32 0.46 
 -4 -3 4 2.5 0.43 
 -4 -3 4 3.17 0.32 
 -4 -3 4 3.53 0.51 
 -4 -3 4 2.75 0.56 
 4 3 -4 2.67 0.58 
 -4 3 4 2.95 0.58 
 -4 3 4 3.92 0.61 
 -4 3 4 3.13 0.54 
 4 3 -4 3.78 0.56 
 3 -3 -4 12.93 0.76 
 3 -3 -4 12.62 0.89 
 3 -3 -4 13.29 0.74 
 -3 -3 4 11.79 0.63 
 -3 -3 4 12.9 0.85 
 -3 -3 4 13.66 0.79 
 3 -3 -4 11.97 0.88 
 -3 -3 4 12.73 0.79 
 -3 -3 4 13.1 0.68 
 -3 3 4 10.7 0.75 
 -3 3 4 13.26 0.91 
 3 3 -4 11.41 0.74 
 3 3 -4 13.26 0.63 
 -2 -3 4 245.49 6.94 
 2 -3 -4 250.58 6.93 
 -2 -3 4 244.14 7.07 
 -2 -3 4 248.46 6.96 
 -2 -3 4 246.08 7.04 
 2 -3 -4 250.97 7.02 
 2 -3 -4 236.83 7.03 
 2 -3 -4 238.5 7.06 
 -2 -3 4 247.66 6.88 
 2 3 -4 250.15 7.05 
 -2 3 4 242.81 6.93 
 2 3 -4 247.66 6.87 
 2 3 -4 246.73 6.94 
 -2 3 4 248.72 7.05 
 -2 3 4 246.37 7.06 
 -1 -3 4 392.37 10.47 
 1 -3 -4 368.39 10.59 
 1 -3 -4 378.7 10.43 
 -1 -3 4 382.64 10.62 
 -1 -3 4 377.13 10.56 
 -1 -3 4 380.83 10.47 
 1 -3 -4 384.42 10.62 
 1 -3 -4 361.59 10.58 
 -1 3 4 386.85 10.6 
 1 3 -4 384.76 10.58 
 1 3 -4 378.68 10.45 
 -1 3 4 370.87 10.43 
 -1 3 4 383.12 10.62 
 -1 3 4 368.94 10.57 
 0 -3 4 74.72 2.41 
 0 -3 -4 74.54 2.39 
 0 -3 4 74.61 2.17 
 0 -3 4 72.43 2.28 
 0 -3 -4 74.56 2.4 
 0 -3 4 76.57 2.42 
 0 -3 -4 76.43 2.46 
 0 3 4 74.35 2.44 
 0 3 4 74.18 2.39 
 0 3 -4 74.93 2.42 
 0 3 -4 76.45 2.28 
 0 3 4 74.62 2.38 
 0 3 -4 77.91 2.44 
 -1 -3 -4 38.76 1.43 
 -1 -3 -4 39.84 1.35 
 -1 -3 -4 36.44 1.45 
 1 -3 4 37.51 1.47 
 1 -3 4 38.71 1.39 
 1 -3 4 40.75 1.51 
 -1 -3 -4 39.69 1.51 
 1 3 4 37.98 1.44 
 -1 3 -4 38.53 1.39 
 1 3 4 39.3 1.23 
 1 3 4 37.58 1.53 
 -1 3 -4 40.3 1.53 
 1 3 4 42.03 1.45 
 2 -3 4 0.86 0.47 
 -2 -3 -4 1.7 0.5 
 -2 -3 -4 1.28 0.29 
 2 -3 4 0.99 0.4 
 -2 -3 -4 1.21 0.3 
 -2 -3 -4 0.95 0.4 
 -2 -3 -4 1.04 0.44 
 2 -3 4 0.42 0.47 
 -2 3 -4 0.82 0.43 
 2 3 4 0.7 0.29 
 2 3 4 0.87 0.41 
 2 3 4 0.52 0.46 
 -2 3 -4 -0.06 0.16 
 2 3 4 0.5 0.42 
 3 -3 4 63.89 2.31 
 3 -3 4 71 2.28 
 -3 -3 -4 66.37 2.1 
 -3 -3 -4 65.85 1.93 
 -3 -3 -4 64.42 2.2 
 -3 -3 -4 65.43 2.23 
 3 3 4 66.14 2.1 
 -3 3 -4 65.13 1.92 
 -3 3 -4 63.97 2.23 
 -3 3 -4 62.93 2.27 
 3 3 4 64.82 2.3 
 3 3 4 68.31 2.23 
 4 -3 4 9.46 0.81 
 4 -3 4 6.49 0.75 
 -4 -3 -4 8.75 0.73 
 -4 -3 -4 9.51 0.81 
 -4 -3 -4 7 0.63 
 -4 3 -4 7.63 0.77 
 4 3 4 8.56 0.82 
 -4 3 -4 7.82 0.75 
 4 3 4 8.89 0.7 
 -4 3 -4 7.33 0.5 
 -5 -3 -4 5.39 0.71 
 5 -3 4 4.91 0.74 
 5 -3 4 5.41 0.75 
 -5 -3 -4 4.18 0.59 
 -5 -3 -4 5.59 0.7 
 5 3 4 5.79 0.7 
 -5 3 -4 5.8 0.5 
 -5 3 -4 4.85 0.7 
 -5 3 -4 3.75 0.71 
 -6 -3 -4 13.79 1.05 
 -6 -3 -4 14.45 1 
 6 -3 4 14.72 1.08 
 6 -3 4 14.29 1.07 
 -6 -3 -4 14.26 0.99 
 6 3 4 13.45 1 
 -6 3 -4 14.5 1.14 
 -6 3 -4 16.82 1.14 
 -6 3 -4 13.17 0.8 
 -7 -3 -4 1.82 0.6 
 7 -3 4 3.18 0.66 
 -7 -3 -4 1 0.57 
 -7 3 -4 2.63 0.72 
 -7 3 -4 1.55 0.62 
 7 3 4 3.1 0.61 
 -8 -3 -4 3.87 0.75 
 8 -3 4 4.47 0.78 
 -8 -3 -4 5.54 0.86 
 -8 3 -4 5 0.85 
 -8 3 -4 5.7 0.9 
 8 3 4 5.7 0.78 
 -9 -3 -4 22.7 1.53 
 -9 -3 -4 24.95 1.48 
 9 -3 4 22.11 1.42 
 9 3 4 23.1 1.38 
 -9 3 -4 20.26 1.54 
 -9 3 -4 21.41 1.6 
 -10 -3 -4 1.38 0.76 
 10 -3 4 -0.36 0.59 
 -10 -3 -4 0.22 0.77 
 -10 3 -4 0.6 0.76 
 -10 3 -4 0.85 0.77 
 10 3 4 0.97 0.62 
 -11 -3 -4 19.05 1.71 
 11 -3 4 20.21 1.47 
 -11 -3 -4 22.11 1.74 
 11 3 4 18.42 1.36 
 -11 3 -4 22.72 1.87 
 -11 3 -4 19.1 1.73 
 -12 -3 -4 1.11 1 
 -12 -3 -4 1.87 0.93 
 -12 3 -4 0.68 0.98 
 -13 -3 -4 -1.05 0.82 
 -13 -3 -4 -1.69 0.9 
 -13 3 -4 -2.41 0.89 
 -14 -3 -4 0.86 1.15 
 -14 -3 -4 0.63 0.97 
 -14 3 -4 -0.02 1.02 
 -14 -4 4 0.81 1 
 -14 -4 4 -1.77 1.09 
 -14 4 4 0.59 1.06 
 -13 -4 4 5.19 1.35 
 -13 -4 4 7.99 1.27 
 -13 4 4 8.81 1.55 
 -13 4 4 6.47 1.36 
 -12 -4 4 2.79 1.11 
 -12 -4 4 3.83 0.99 
 -12 4 4 3.75 1.1 
 -12 4 4 1.93 0.87 
 -12 4 4 3.6 1.15 
 -11 -4 4 4.06 1.08 
 -11 -4 4 2.32 0.83 
 -11 4 4 1.31 0.84 
 -11 4 4 2.27 0.82 
 -11 4 4 2.11 1.01 
 -10 -4 4 1.42 0.86 
 -10 -4 4 0.33 0.64 
 -10 4 4 0.77 0.79 
 -10 4 4 0.03 0.64 
 -10 4 4 0.19 0.75 
 -9 -4 4 0.25 0.73 
 9 -4 -4 0.5 0.34 
 -9 -4 4 0.63 0.57 
 -9 4 4 0.85 0.64 
 -9 4 4 0.21 0.7 
 -9 4 4 0.04 0.64 
 8 -4 -4 9.24 0.68 
 8 -4 -4 8.74 0.99 
 -8 -4 4 5.76 0.91 
 -8 -4 4 7.88 0.84 
 -8 4 4 7.46 1 
 -8 4 4 9.14 0.99 
 -8 4 4 10.12 1.07 
 7 -4 -4 5.27 0.53 
 -7 -4 4 3.44 0.72 
 -7 -4 4 5.19 0.67 
 7 -4 -4 5.64 0.8 
 -7 4 4 4.58 0.79 
 -7 4 4 3.22 0.71 
 -7 4 4 3.33 0.72 
 -7 4 4 5.79 0.82 
 -6 -4 4 0.75 0.41 
 -6 -4 4 1.14 0.18 
 -6 -4 4 0.4 0.38 
 -6 -4 4 0.46 0.18 
 6 -4 -4 0.38 0.51 
 -6 -4 4 0.96 0.53 
 -6 4 4 0.87 0.5 
 -6 4 4 1.18 0.58 
 -6 4 4 -0.24 0.49 
 -6 4 4 0.58 0.47 
 6 4 -4 0.43 0.52 
 5 -4 -4 50.63 1.95 
 -5 -4 4 47.94 1.97 
 -5 -4 4 46.55 1.72 
 -5 -4 4 47.72 1.51 
 -5 -4 4 49.71 1.79 
 -5 4 4 53.96 2.01 
 5 4 -4 45.53 1.94 
 -5 4 4 47.8 1.86 
 -5 4 4 48.68 1.95 
 -4 -4 4 0.47 0.3 
 4 -4 -4 0.09 0.4 
 -4 -4 4 -0.06 0.32 
 4 -4 -4 0.53 0.51 
 -4 -4 4 -0.05 0.29 
 -4 -4 4 0.21 0.27 
 -4 -4 4 0.04 0.43 
 -4 4 4 0.41 0.41 
 4 4 -4 -0.35 0.4 
 -4 4 4 0.56 0.47 
 -4 4 4 0.47 0.48 
 -4 4 4 0.22 0.42 
 -3 -4 4 138.7 4.12 
 3 -4 -4 134.62 4.04 
 3 -4 -4 136.88 4.17 
 -3 -4 4 139.29 4.21 
 -3 -4 4 137.43 3.99 
 -3 -4 4 139.47 3.94 
 3 -4 -4 132.54 4.18 
 3 4 -4 135.31 4.13 
 3 4 -4 139.82 4.22 
 -3 4 4 143.87 4.2 
 -3 4 4 132.4 4.04 
 -3 4 4 129.95 4.17 
 -2 -4 4 30.99 1.03 
 2 -4 -4 26.7 1.23 
 -2 -4 4 29.69 1.24 
 2 -4 -4 29.76 1.09 
 2 -4 -4 27.91 1.23 
 -2 -4 4 30.42 1.15 
 2 -4 -4 27.79 1.23 
 -2 -4 4 28.8 1.25 
 2 4 -4 30.88 1.17 
 2 4 -4 31.04 1.01 
 2 4 -4 32.57 1.28 
 -2 4 4 27.88 1.09 
 -2 4 4 28.81 1.23 
 -2 4 4 30.36 1.41 
 1 -4 -4 2.17 0.49 
 -1 -4 4 3.17 0.46 
 -1 -4 4 3.21 0.52 
 1 -4 -4 2.98 0.3 
 -1 -4 4 3.02 0.33 
 1 -4 -4 2.54 0.46 
 1 -4 -4 2.65 0.52 
 1 4 -4 2.56 0.51 
 1 4 -4 2.57 0.45 
 -1 4 4 2.71 0.48 
 -1 4 4 2.59 0.3 
 1 4 -4 3.1 0.31 
 -1 4 4 3.33 0.53 
 0 -4 4 74.23 2.39 
 0 -4 -4 70.58 2.36 
 0 -4 -4 72.01 2.35 
 0 -4 4 74.37 2.41 
 0 -4 -4 75.03 2.45 
 0 -4 4 71.16 2.22 
 0 4 -4 73.67 2.4 
 0 4 4 72.56 2.06 
 0 4 -4 69.85 2.2 
 0 4 4 73.26 2.36 
 0 4 4 75.31 2.46 
 -1 -4 -4 8.88 0.69 
 -1 -4 -4 9.8 0.76 
 1 -4 4 9.5 0.83 
 -1 -4 -4 9.84 0.73 
 1 -4 4 8.64 0.66 
 1 4 4 9.42 0.42 
 1 4 4 7.79 0.71 
 1 4 4 9.77 0.74 
 1 4 4 10.25 0.71 
 -1 4 -4 8.44 0.63 
 -1 4 -4 9.81 0.79 
 -2 -4 -4 1.26 0.47 
 -2 -4 -4 1.13 0.32 
 -2 -4 -4 1.86 0.45 
 2 -4 4 0.98 0.47 
 2 -4 4 1.22 0.42 
 -2 -4 -4 1.13 0.28 
 2 4 4 1.15 0.4 
 2 4 4 1.06 0.48 
 2 4 4 1.5 0.5 
 2 4 4 1.31 0.29 
 -2 4 -4 1.45 0.37 
 -3 -4 -4 25.4 0.87 
 -3 -4 -4 24.92 1.17 
 3 -4 4 24.73 1.24 
 -3 -4 -4 24.53 1.19 
 3 -4 4 26.81 1.21 
 -3 -4 -4 26.32 1 
 3 4 4 25.63 1.01 
 -3 4 -4 23.01 1.21 
 -3 4 -4 25.94 0.81 
 -3 4 -4 26.48 1.16 
 3 4 4 24 1.26 
 3 4 4 24.39 0.87 
 4 -4 4 61.62 2.34 
 -4 -4 -4 65.75 2.18 
 4 -4 4 68.83 2.36 
 -4 -4 -4 66.98 2.3 
 -4 -4 -4 66.16 2.31 
 -4 4 -4 64.27 2.32 
 4 4 4 65.65 2.36 
 -4 4 -4 66.1 1.99 
 4 4 4 66.15 2.16 
 -4 4 -4 66.65 2.39 
 -5 -4 -4 75.03 2.65 
 5 -4 4 74.39 2.73 
 -5 -4 -4 75.78 2.54 
 -5 -4 -4 76.27 2.65 
 5 -4 4 80.07 2.74 
 5 4 4 79.27 2.7 
 -5 4 -4 75.1 2.7 
 -5 4 -4 78.44 2.75 
 -5 4 -4 77.38 2.38 
 -6 -4 -4 0.12 0.47 
 -6 -4 -4 -0.19 0.47 
 6 -4 4 0.01 0.49 
 6 -4 4 0.31 0.49 
 -6 -4 -4 0.28 0.45 
 6 4 4 -0.2 0.45 
 -6 4 -4 -0.35 0.48 
 -6 4 -4 0.21 0.31 
 -6 4 -4 -0.68 0.53 
 7 -4 4 7.59 1.1 
 -7 -4 -4 5.78 0.78 
 -7 -4 -4 6.17 0.75 
 7 -4 4 4.87 0.79 
 -7 -4 -4 6.32 0.82 
 -7 4 -4 5.54 0.79 
 -7 4 -4 5.16 0.82 
 7 4 4 5.57 0.76 
 -8 -4 -4 18.18 1.29 
 8 -4 4 16.67 1.27 
 -8 -4 -4 16.62 1.23 
 -8 4 -4 15.31 1.34 
 8 4 4 14.64 1.14 
 -8 4 -4 18.22 1.32 
 9 -4 4 -0.34 0.55 
 -9 -4 -4 0.51 0.65 
 -9 -4 -4 -0.22 0.6 
 -9 4 -4 0.46 0.6 
 9 4 4 1.48 0.6 
 -9 4 -4 -0.27 0.71 
 10 -4 4 1.99 0.73 
 -10 -4 -4 1.71 0.84 
 -10 -4 -4 1.73 0.81 
 -10 4 -4 2.63 0.97 
 10 4 4 1.68 0.68 
 -10 4 -4 2.54 0.9 
 11 -4 4 4.27 0.89 
 -11 -4 -4 3.99 0.97 
 -11 -4 -4 4.06 1.06 
 11 4 4 5.34 1.29 
 -11 4 -4 4.17 1.15 
 -12 -4 -4 0.55 0.81 
 -12 -4 -4 -1.08 0.81 
 -12 4 -4 0.11 0.86 
 -13 -4 -4 3.92 1.17 
 -13 -4 -4 1.55 1.1 
 -13 4 -4 7.08 1.35 
 -14 -5 4 0.69 0.94 
 -14 -5 4 0.48 1.23 
 -14 5 4 2.59 1.19 
 -13 -5 4 3.58 1.07 
 -13 -5 4 3.45 1.16 
 -13 5 4 2.14 1.2 
 -12 -5 4 1.02 1.02 
 -12 -5 4 0.56 0.77 
 -12 5 4 0.41 0.84 
 -12 5 4 0.17 0.87 
 -12 5 4 1.25 0.85 
 -11 -5 4 0.24 0.69 
 -11 -5 4 1.01 0.93 
 -11 5 4 0.56 0.88 
 -11 5 4 -0.31 0.69 
 -11 5 4 0.56 0.84 
 -10 -5 4 2.79 0.92 
 -10 -5 4 1.56 0.67 
 -10 5 4 1.35 0.77 
 -10 5 4 1.17 0.82 
 -10 5 4 1.2 0.74 
 -9 -5 4 22.41 1.56 
 9 -5 -4 27.16 1.2 
 -9 -5 4 24.77 1.44 
 9 -5 -4 25.15 1.61 
 -9 5 4 26.3 1.59 
 -9 5 4 23.02 1.55 
 -9 5 4 26.55 1.7 
 8 -5 -4 5.79 0.62 
 8 -5 -4 3.73 0.74 
 -8 -5 4 4.17 0.82 
 -8 -5 4 5.84 0.72 
 -8 5 4 6.26 0.87 
 -8 5 4 6.45 0.96 
 -8 5 4 6.72 0.97 
 -7 -5 4 28.96 0.95 
 -7 -5 4 29.79 1.32 
 -7 -5 4 28.84 1.57 
 -7 -5 4 29.86 0.96 
 -7 -5 4 28.45 1.33 
 7 -5 -4 29.03 1.27 
 7 -5 -4 29.61 1.58 
 -7 5 4 29.49 1.58 
 -7 5 4 29.15 1.53 
 7 5 -4 26.73 1.48 
 -7 5 4 29.81 1.61 
 -6 -5 4 19.92 1.23 
 6 -5 -4 20.63 1.25 
 -6 -5 4 19.69 0.8 
 -6 -5 4 21.5 1.05 
 -6 -5 4 20.22 1.04 
 6 5 -4 19.05 1.2 
 -6 5 4 19.32 1.19 
 -6 5 4 19.5 1.27 
 -6 5 4 20.35 1.48 
 -6 5 4 22.84 1.27 
 -5 -5 4 31.55 1.27 
 -5 -5 4 35.23 1.6 
 -5 -5 4 32.78 1.18 
 5 -5 -4 35.63 1.57 
 -5 -5 4 34.56 1.4 
 -5 5 4 30.08 1.43 
 -5 5 4 37.5 1.63 
 -5 5 4 34.13 1.59 
 -5 5 4 31.23 1.55 
 5 5 -4 31.68 1.55 
 -4 -5 4 1.05 0.42 
 -4 -5 4 0.83 0.53 
 -4 -5 4 1.5 0.33 
 -4 -5 4 1.57 0.32 
 4 -5 -4 0.66 0.45 
 -4 -5 4 1.13 0.34 
 4 -5 -4 1.29 0.47 
 -4 5 4 1.93 0.55 
 4 5 -4 1.3 0.53 
 -4 5 4 1.77 0.52 
 -4 5 4 1.67 0.45 
 -4 5 4 0.64 0.46 
 3 -5 -4 195.51 5.71 
 -3 -5 4 200.09 5.58 
 -3 -5 4 195.63 5.7 
 -3 -5 4 199.58 5.88 
 3 -5 -4 201.07 5.91 
 3 -5 -4 193.61 5.84 
 -3 -5 4 201.99 5.82 
 -3 5 4 198.58 5.92 
 3 5 -4 196.71 5.9 
 -3 5 4 205.08 5.91 
 -3 5 4 193.68 5.7 
 2 -5 -4 47.11 1.81 
 2 -5 -4 46.62 1.81 
 -2 -5 4 51.09 1.74 
 -2 -5 4 46.86 1.74 
 -2 -5 4 48.47 1.51 
 2 -5 -4 47.76 1.58 
 -2 5 4 50.05 1.8 
 2 5 -4 51.58 1.85 
 2 5 -4 50.53 1.74 
 -2 5 4 51.31 1.86 
 -2 5 4 48.55 1.59 
 -1 -5 4 45.05 1.66 
 1 -5 -4 43.11 1.78 
 -1 -5 4 43.19 1.39 
 1 -5 -4 44.51 1.65 
 1 -5 -4 43.2 1.65 
 -1 -5 4 43.71 1.61 
 1 -5 -4 44.4 1.35 
 -1 5 4 43.34 1.35 
 1 5 -4 44.37 1.64 
 -1 5 4 46.61 1.68 
 -1 5 4 46.28 1.63 
 1 5 -4 42.46 1.35 
 0 -5 4 105.48 3.3 
 0 -5 4 106.12 3.1 
 0 -5 -4 102.81 3.27 
 0 -5 4 103.49 3.3 
 0 -5 -4 102.99 3.25 
 0 5 4 106.16 3.25 
 0 5 4 106.8 3.24 
 0 5 -4 106.14 3.08 
 0 5 -4 108.57 3.34 
 -1 -5 -4 28.97 1.24 
 1 -5 4 30.75 0.92 
 1 -5 4 31.58 1.19 
 1 -5 4 30.58 1.37 
 -1 -5 -4 27.35 1.24 
 -1 5 -4 30.74 1.16 
 1 5 4 29.73 1.18 
 1 5 4 30.89 1.26 
 2 -5 4 16.34 1.01 
 -2 -5 -4 18.92 1.03 
 2 -5 4 17.56 0.93 
 -2 -5 -4 16.56 0.94 
 -2 -5 -4 17.15 0.67 
 2 5 4 18.39 0.79 
 2 5 4 17.57 0.68 
 2 5 4 19.28 1.13 
 -2 5 -4 16.82 0.92 
 3 -5 4 5.16 0.61 
 3 -5 4 5.42 0.75 
 -3 -5 -4 6.41 0.44 
 -3 -5 -4 5.35 0.58 
 -3 -5 -4 4.51 0.61 
 -3 -5 -4 5.5 0.45 
 3 5 4 5.6 0.41 
 -3 5 -4 5.29 0.67 
 -3 5 -4 5.94 0.32 
 -3 5 -4 6.44 0.76 
 3 5 4 6.44 0.49 
 3 5 4 5.47 0.71 
 -4 -5 -4 9.79 0.88 
 -4 -5 -4 8.77 0.39 
 -4 -5 -4 8.97 0.77 
 -4 -5 -4 11.4 0.7 
 4 -5 4 7.37 0.8 
 4 -5 4 8.32 0.78 
 -4 5 -4 8.91 0.48 
 -4 5 -4 8.03 0.85 
 4 5 4 9.95 0.67 
 4 5 4 9.52 0.9 
 -4 5 -4 10.12 0.86 
 -5 -5 -4 3.52 0.62 
 -5 -5 -4 3.68 0.53 
 -5 -5 -4 4.07 0.61 
 5 -5 4 3.9 0.6 
 5 -5 4 3.39 0.65 
 -5 5 -4 3.67 0.73 
 -5 5 -4 3.85 0.41 
 -5 5 -4 2.26 0.56 
 5 5 4 2.81 0.61 
 6 -5 4 0.47 0.5 
 6 -5 4 -0.02 0.5 
 -6 -5 -4 0.52 0.44 
 -6 -5 -4 -0.16 0.45 
 -6 -5 -4 -0.05 0.5 
 6 5 4 0.35 0.48 
 -6 5 -4 -0.04 0.51 
 -6 5 -4 0.23 0.47 
 -6 5 -4 0.27 0.3 
 -7 -5 -4 1.04 0.59 
 7 -5 4 2.09 0.62 
 -7 -5 -4 0.62 0.56 
 7 -5 4 2.38 0.67 
 -7 -5 -4 0.62 0.51 
 7 5 4 0.79 0.55 
 -7 5 -4 0.61 0.56 
 -7 5 -4 0.82 0.6 
 8 -5 4 0.56 0.6 
 -8 -5 -4 0.73 0.6 
 -8 -5 -4 1.09 0.62 
 -8 -5 -4 0.65 0.63 
 -8 5 -4 1.05 0.58 
 -8 5 -4 -0.13 0.61 
 8 5 4 0.84 0.59 
 -9 -5 -4 31.46 1.78 
 9 -5 4 28.85 1.7 
 -9 -5 -4 32.86 1.74 
 -9 -5 -4 28.39 1.71 
 9 5 4 30.7 1.66 
 -9 5 -4 34.34 1.86 
 -9 5 -4 33.24 1.87 
 -10 -5 -4 19.25 1.5 
 10 -5 4 17.46 1.39 
 -10 -5 -4 20.14 1.53 
 -10 -5 -4 18.18 1.54 
 -10 5 -4 17.93 1.86 
 -10 5 -4 21.18 1.8 
 10 5 4 17.08 1.32 
 -11 -5 -4 31.45 1.93 
 11 -5 4 30.22 1.8 
 -11 -5 -4 27.9 1.88 
 -11 -5 -4 29.49 1.93 
 -11 5 -4 28.05 1.96 
 -12 -5 -4 0.94 0.87 
 -12 -5 -4 0.83 0.81 
 -12 -5 -4 1.34 0.89 
 -12 5 -4 -0.17 1 
 -13 -5 -4 1.81 0.93 
 -13 -5 -4 -0.66 0.95 
 -13 -5 -4 -1.38 0.74 
 -13 5 -4 1.29 1.02 
 -14 -6 4 10.18 1.47 
 -14 -6 4 11.17 1.63 
 -14 6 4 11.83 1.81 
 -13 -6 4 1.62 1.08 
 -13 -6 4 1.58 0.94 
 -13 6 4 2.59 1.05 
 -12 -6 4 1.83 0.83 
 -12 -6 4 2.78 1.05 
 -12 6 4 2.17 0.99 
 -11 -6 4 1.98 0.87 
 -11 -6 4 0.3 0.69 
 -11 6 4 0.87 0.9 
 -11 6 4 0.12 0.77 
 -11 6 4 0.83 0.8 
 -10 -6 4 0.56 0.85 
 -10 -6 4 1.25 0.64 
 -10 6 4 -0.66 0.66 
 -10 6 4 0.85 0.72 
 -10 6 4 0.61 0.8 
 -9 -6 4 2.02 0.78 
 9 -6 -4 0.94 0.48 
 -9 -6 4 0.66 0.54 
 9 -6 -4 1.23 0.74 
 -9 6 4 0.79 0.7 
 -9 6 4 2.28 0.81 
 -9 6 4 1.35 0.75 
 -8 -6 4 7.23 1.05 
 -8 -6 4 7.68 0.81 
 8 -6 -4 7.57 0.77 
 -8 -6 4 7.54 0.45 
 8 -6 -4 8.41 1.02 
 -8 -6 4 5.95 0.39 
 -8 6 4 7.33 0.98 
 -8 6 4 8.23 1.02 
 -8 6 4 7.28 0.98 
 -7 -6 4 1.63 0.33 
 7 -6 -4 1.98 0.5 
 -7 -6 4 1.6 0.46 
 -7 -6 4 2.36 0.3 
 -7 -6 4 2.48 0.49 
 7 -6 -4 1.21 0.61 
 -7 -6 4 1.57 0.69 
 7 6 -4 1.27 0.61 
 -7 6 4 2.83 0.73 
 -7 6 4 1.45 0.64 
 -7 6 4 1.77 0.65 
 -6 -6 4 2.76 0.45 
 6 -6 -4 2.71 0.66 
 -6 -6 4 1.67 0.63 
 -6 -6 4 2.8 0.39 
 -6 -6 4 2.86 0.5 
 -6 6 4 3.71 0.72 
 -6 6 4 2.65 0.65 
 6 6 -4 2.23 0.66 
 -6 6 4 3.98 0.67 
 -5 -6 4 2.13 0.5 
 -5 -6 4 2.57 0.41 
 5 -6 -4 1.88 0.59 
 -5 -6 4 2.68 0.65 
 -5 -6 4 1.67 0.37 
 -5 6 4 2.35 0.56 
 -5 6 4 1.99 0.57 
 5 6 -4 2.07 0.56 
 -5 6 4 3.34 0.64 
 -4 -6 4 57.78 2.14 
 -4 -6 4 56.97 1.78 
 4 -6 -4 51.8 2.04 
 -4 -6 4 56.49 2 
 -4 -6 4 55.45 1.89 
 -4 -6 4 57.65 1.78 
 4 6 -4 54.82 2.15 
 -4 6 4 55.76 2.14 
 -4 6 4 57.54 2.19 
 -4 6 4 54.79 1.97 
 -3 -6 4 5.94 0.59 
 -3 -6 4 7.94 0.76 
 -3 -6 4 5.37 0.4 
 3 -6 -4 7.14 0.57 
 3 -6 -4 5.9 0.67 
 -3 -6 4 5.63 0.62 
 3 -6 -4 5.9 0.71 
 -3 6 4 7.06 0.78 
 -3 6 4 7.41 0.59 
 3 6 -4 7.19 0.8 
 -3 6 4 6.46 0.73 
 2 -6 -4 52.97 1.69 
 -2 -6 4 53.89 1.92 
 2 -6 -4 52.63 1.94 
 -2 -6 4 52.46 1.58 
 -2 -6 4 52.86 1.86 
 2 -6 -4 54.42 1.96 
 2 6 -4 53.25 1.99 
 -2 6 4 51.63 1.95 
 -2 6 4 51.24 1.68 
 1 -6 -4 43.63 1.67 
 1 -6 -4 41.21 1.61 
 -1 -6 4 43.68 1.61 
 -1 -6 4 40.64 1.63 
 1 -6 -4 40.87 1.28 
 -1 -6 4 41.02 1.32 
 -1 6 4 43.44 1.66 
 -1 6 4 41.41 1.28 
 1 6 -4 42.24 1.26 
 1 6 -4 41.84 1.66 
 0 -6 4 0.47 0.36 
 0 -6 4 1.08 0.3 
 0 -6 -4 1.02 0.42 
 0 -6 -4 -0.07 0.39 
 0 -6 4 0.84 0.28 
 0 6 -4 1.06 0.26 
 0 6 -4 0.77 0.47 
 0 6 4 0.48 0.39 
 -1 -6 -4 -0.15 0.42 
 1 -6 4 -0.13 0.19 
 -1 -6 -4 -0.04 0.36 
 1 -6 4 0.44 0.33 
 1 -6 4 0.81 0.51 
 1 6 4 0.3 0.34 
 -1 6 -4 0 0.31 
 -1 6 -4 -0.2 0.48 
 -2 -6 -4 11.33 0.85 
 2 -6 4 12.06 0.99 
 2 -6 4 11.92 0.81 
 -2 -6 -4 12.06 0.81 
 -2 -6 -4 11.81 0.49 
 -2 6 -4 11.02 0.77 
 -2 6 -4 11.71 0.91 
 2 6 4 11.62 0.51 
 2 6 4 12.43 0.7 
 3 -6 4 36.28 1.48 
 -3 -6 -4 36.95 1.24 
 -3 -6 -4 34.81 1.46 
 3 -6 4 34.78 1.59 
 -3 -6 -4 34 1.56 
 -3 6 -4 37.56 1.11 
 -3 6 -4 35.34 1.47 
 -3 6 -4 36.11 1.56 
 3 6 4 37.23 1.26 
 -4 -6 -4 3.29 0.64 
 4 -6 4 4.1 0.62 
 4 -6 4 4.16 0.72 
 -4 -6 -4 4.84 0.58 
 -4 -6 -4 4.27 0.46 
 -4 -6 -4 4.52 0.33 
 4 6 4 4.45 0.5 
 4 6 4 4.07 0.65 
 -4 6 -4 4.61 0.73 
 -4 6 -4 3.6 0.34 
 5 -6 4 6.82 0.82 
 -5 -6 -4 4.73 0.73 
 -5 -6 -4 5.53 0.69 
 -5 -6 -4 6.29 0.62 
 5 -6 4 6.17 0.82 
 -5 6 -4 5.94 0.47 
 -5 6 -4 6.98 0.79 
 -5 6 -4 5.31 0.77 
 5 6 4 4.74 0.72 
 -6 -6 -4 4.39 0.69 
 -6 -6 -4 4.92 0.64 
 6 -6 4 4.89 0.75 
 6 -6 4 4.17 0.76 
 -6 -6 -4 3.63 0.68 
 -6 6 -4 4.22 0.69 
 6 6 4 5.4 0.76 
 -6 6 -4 4.86 0.5 
 -6 6 -4 3.76 0.72 
 7 -6 4 2.43 0.67 
 -7 -6 -4 3.84 0.67 
 -7 -6 -4 4.4 0.68 
 7 -6 4 2.58 0.76 
 -7 -6 -4 3.96 0.77 
 -7 6 -4 2.16 0.6 
 7 6 4 3.33 0.7 
 -7 6 -4 3.61 0.79 
 8 -6 4 1.11 0.67 
 -8 -6 -4 0.8 0.62 
 -8 -6 -4 1.59 0.71 
 -8 -6 -4 0.65 0.58 
 -8 6 -4 2.41 0.67 
 -8 6 -4 2.05 0.8 
 8 6 4 0.68 0.58 
 -9 -6 -4 1.7 0.72 
 9 -6 4 2.2 0.75 
 -9 -6 -4 2.11 0.79 
 -9 -6 -4 1.71 0.72 
 -9 6 -4 2.12 0.72 
 9 6 4 2.85 0.72 
 -9 6 -4 1.89 0.81 
 -10 -6 -4 0.18 0.7 
 -10 -6 -4 -0.67 0.67 
 10 -6 4 -0.26 0.68 
 -10 -6 -4 0.07 0.63 
 10 6 4 -0.62 0.56 
 -10 6 -4 -0.27 0.84 
 -11 -6 -4 -0.31 0.74 
 -11 -6 -4 1.13 0.78 
 -11 -6 -4 0.14 0.79 
 11 -6 4 1.32 0.75 
 -11 6 -4 0.08 0.8 
 -12 -6 -4 3.97 1.09 
 -12 -6 -4 6.21 1.16 
 -12 -6 -4 4.6 1.05 
 -12 6 -4 4.56 1.21 
 -13 -6 -4 2.33 1.05 
 -13 -6 -4 0.91 1.02 
 -13 -6 -4 1.11 0.97 
 -13 6 -4 -1.46 1.05 
 -13 -7 4 3.82 1.23 
 -13 -7 4 1.24 0.89 
 -13 7 4 1.88 1.13 
 -12 -7 4 0.2 0.74 
 -12 -7 4 0.04 0.87 
 -12 7 4 -0.09 0.84 
 -11 -7 4 1.25 0.72 
 -11 -7 4 0.24 0.94 
 -11 7 4 0.9 0.96 
 -10 -7 4 0.7 0.79 
 -10 -7 4 0.89 0.59 
 10 -7 -4 -0.62 0.72 
 -10 7 4 1.12 0.83 
 -10 7 4 0.23 0.78 
 -10 7 4 0.56 0.7 
 -9 -7 4 3.02 0.91 
 -9 -7 4 2.46 0.61 
 9 -7 -4 2.8 0.61 
 9 -7 -4 3.91 0.86 
 -9 7 4 2.58 0.8 
 -9 7 4 2.55 0.75 
 -9 7 4 2.07 0.83 
 -8 -7 4 8.76 0.61 
 -8 -7 4 9.51 0.84 
 -8 -7 4 6.99 0.76 
 8 -7 -4 9.87 0.91 
 8 -7 -4 7.9 0.99 
 -8 -7 4 11.21 1.19 
 8 7 -4 7.76 1.01 
 -8 7 4 7.16 0.99 
 -8 7 4 8.62 1.1 
 -8 7 4 8.87 1.03 
 -7 -7 4 27.67 1.15 
 -7 -7 4 29.47 1.34 
 -7 -7 4 29.88 1.15 
 -7 -7 4 29.48 1.59 
 7 -7 -4 29.97 1.42 
 7 -7 -4 29.16 1.58 
 -7 -7 4 27.24 1.28 
 -7 7 4 28.99 1.54 
 -7 7 4 31.66 1.71 
 7 7 -4 27.39 1.61 
 -7 7 4 27.63 1.62 
 -6 -7 4 16.86 1.14 
 -6 -7 4 14.85 0.85 
 -6 -7 4 16.66 0.87 
 -6 -7 4 15.94 0.94 
 6 -7 -4 16.37 1.18 
 -6 7 4 16.65 1.1 
 -6 7 4 17 1.19 
 6 7 -4 14.9 1.11 
 -6 7 4 16.24 1.25 
 5 -7 -4 1.41 0.58 
 -5 -7 4 2.12 0.44 
 -5 -7 4 2.71 0.59 
 -5 -7 4 1.75 0.36 
 -5 -7 4 2.34 0.49 
 5 7 -4 2.71 0.62 
 -5 7 4 1.43 0.62 
 -5 7 4 3.96 0.73 
 -5 7 4 1.93 0.53 
 4 -7 -4 10.23 0.87 
 -4 -7 4 11.21 0.9 
 -4 -7 4 11.67 0.58 
 -4 -7 4 11.19 0.84 
 -4 -7 4 11.74 0.79 
 -4 -7 4 12.3 0.58 
 -4 7 4 10.44 0.8 
 -4 7 4 11.88 0.96 
 4 7 -4 9.1 0.91 
 -4 7 4 11.04 1.01 
 3 -7 -4 19.84 0.91 
 -3 -7 4 20.31 1.01 
 -3 -7 4 20.99 1.07 
 -3 -7 4 22.28 1.1 
 3 -7 -4 19.1 1.17 
 3 -7 -4 21.09 1.17 
 -3 -7 4 20.52 0.71 
 -3 7 4 19.73 0.93 
 -3 7 4 20.84 1.14 
 3 7 -4 18.76 1.17 
 -3 7 4 18.62 1.14 
 -2 -7 4 111.24 3.42 
 2 -7 -4 107.27 3.45 
 2 -7 -4 106.92 3.16 
 -2 -7 4 111.2 3.44 
 2 -7 -4 101.05 3.42 
 -2 -7 4 108.96 3.04 
 -2 7 4 107.24 3.17 
 2 7 -4 108.88 3.52 
 -2 7 4 104.32 3.47 
 1 -7 -4 32.81 1.04 
 -1 -7 4 34.35 1.45 
 -1 -7 4 32.51 1.07 
 1 -7 -4 35.18 1.48 
 -1 -7 4 35.38 1.44 
 1 -7 -4 31.75 1.38 
 -1 7 4 31.53 1.44 
 -1 7 4 31.66 1.04 
 1 7 -4 32.48 1.43 
 0 -7 -4 26.58 1.32 
 0 -7 -4 28.03 1.24 
 0 -7 4 27.17 1.02 
 0 -7 4 27.01 1.31 
 0 -7 4 27.26 1.03 
 0 7 -4 27.4 1.29 
 0 7 4 27.98 1.26 
 0 7 -4 27.54 0.97 
 1 -7 4 -0.44 0.21 
 -1 -7 -4 -0.19 0.36 
 1 -7 4 0.42 0.34 
 1 -7 4 -0.09 0.42 
 -1 -7 -4 0.17 0.41 
 -1 7 -4 0.12 0.51 
 -1 7 -4 0.2 0.3 
 1 7 4 0.52 0.38 
 2 -7 4 4.22 0.55 
 -2 -7 -4 5.32 0.59 
 -2 -7 -4 5.6 0.31 
 -2 -7 -4 5.16 0.69 
 2 -7 4 3.9 0.63 
 2 -7 4 4.17 0.32 
 -2 7 -4 5.38 0.55 
 2 7 4 5.03 0.32 
 2 7 4 4.84 0.51 
 -2 7 -4 5.33 0.73 
 -3 -7 -4 48.03 1.88 
 -3 -7 -4 45.03 1.75 
 3 -7 4 46.99 1.44 
 -3 -7 -4 48 1.51 
 3 -7 4 46.01 1.78 
 3 -7 4 48.39 2 
 -3 7 -4 47.06 1.78 
 -3 7 -4 49.32 1.45 
 -3 7 -4 46.08 1.89 
 3 7 4 48.17 1.54 
 4 -7 4 3.93 0.68 
 -4 -7 -4 4.3 0.45 
 -4 -7 -4 3.86 0.56 
 4 -7 4 3.14 0.6 
 -4 -7 -4 1.92 0.56 
 4 7 4 2.52 0.43 
 -4 7 -4 4.06 0.36 
 -4 7 -4 4.51 0.71 
 -4 7 -4 3.48 0.72 
 5 -7 4 21.19 1.34 
 5 -7 4 24.25 1.34 
 -5 -7 -4 26.63 1.44 
 -5 -7 -4 24.83 1.27 
 -5 -7 -4 26.76 1.13 
 -5 7 -4 23.52 1.45 
 -5 7 -4 25.31 0.96 
 -5 7 -4 25.39 1.31 
 6 -7 4 5.02 0.8 
 6 -7 4 3.43 0.73 
 -6 -7 -4 5.16 0.69 
 -6 -7 -4 6.86 0.89 
 -6 -7 -4 5.96 0.68 
 -6 7 -4 4.48 0.7 
 -6 7 -4 4.91 0.49 
 -6 7 -4 4.64 0.79 
 7 -7 4 29.03 1.7 
 7 -7 4 33.86 1.76 
 -7 -7 -4 33.34 1.78 
 -7 -7 -4 28.16 1.57 
 -7 -7 -4 34.79 1.53 
 -7 7 -4 32.66 1.69 
 -7 7 -4 35.5 1.79 
 -8 -7 -4 0.11 0.55 
 8 -7 4 0.73 0.68 
 -8 -7 -4 -0.01 0.65 
 -8 -7 -4 0.46 0.56 
 -8 7 -4 -1.04 0.46 
 -8 7 -4 -0.39 0.61 
 -9 -7 -4 41.96 2.08 
 9 -7 4 45.07 2.2 
 -9 -7 -4 45.46 2.13 
 -9 -7 -4 49.69 2.3 
 -9 7 -4 43.76 2.33 
 -10 -7 -4 38.48 2.17 
 -10 -7 -4 42.19 2.13 
 10 -7 4 36.48 2.12 
 -10 -7 -4 42.43 2.08 
 -10 7 -4 35.71 2.17 
 -11 -7 -4 8.88 1.2 
 11 -7 4 12.45 1.35 
 -11 -7 -4 13.03 1.39 
 -11 -7 -4 11.74 1.44 
 -11 7 -4 10.7 1.43 
 -12 -7 -4 3.66 1.11 
 -12 -7 -4 4.57 1.17 
 -12 -7 -4 3.34 1.06 
 -12 7 -4 7.02 1.41 
 -13 -7 -4 1.4 0.94 
 -13 -7 -4 3.6 1.12 
 -13 -7 -4 2.82 1.12 
 -13 7 -4 -0.21 0.95 
 -13 -8 4 -0.38 0.91 
 -13 -8 4 0.09 0.79 
 -13 8 4 0.06 1.07 
 -12 -8 4 4.27 0.95 
 -12 -8 4 2.52 1.02 
 -12 8 4 3.58 1.14 
 -11 -8 4 1.77 0.71 
 -11 -8 4 0.47 0.96 
 -11 8 4 1.31 0.84 
 -10 -8 4 2.53 0.7 
 -10 -8 4 3.02 0.99 
 10 -8 -4 3.05 0.94 
 -10 8 4 2.91 0.89 
 -9 -8 4 1.27 0.84 
 9 -8 -4 2.37 0.8 
 9 -8 -4 1.34 0.58 
 -9 -8 4 2.24 0.61 
 9 8 -4 2.31 0.87 
 -9 8 4 2.1 0.9 
 -9 8 4 0.92 0.77 
 -9 8 4 1.75 0.73 
 -8 -8 4 14.08 1.29 
 8 -8 -4 13.2 1.07 
 -8 -8 4 12.09 0.93 
 -8 -8 4 13.67 0.96 
 8 -8 -4 13.75 1.23 
 -8 -8 4 13.28 0.81 
 -8 8 4 11.29 1.19 
 -8 8 4 10.56 1.15 
 -8 8 4 12.67 1.3 
 8 8 -4 13.33 1.34 
 -7 -8 4 11.12 1.14 
 -7 -8 4 8.33 0.69 
 -7 -8 4 6.99 0.74 
 7 -8 -4 8.38 0.99 
 7 -8 -4 7.2 0.83 
 -7 -8 4 8.05 0.68 
 -7 8 4 6.74 0.9 
 -7 8 4 8.3 0.98 
 -7 8 4 9.03 1.1 
 7 8 -4 4.5 0.86 
 6 -8 -4 9.2 0.99 
 -6 -8 4 7.77 0.93 
 -6 -8 4 7.11 0.67 
 -6 -8 4 8.55 0.8 
 -6 -8 4 6.53 0.57 
 -6 8 4 6.94 0.92 
 6 8 -4 7.06 0.9 
 -6 8 4 7.38 0.92 
 -6 8 4 6.64 0.8 
 -5 -8 4 4.76 0.42 
 -5 -8 4 5.81 0.46 
 -5 -8 4 4.73 0.61 
 -5 -8 4 4.6 0.63 
 5 -8 -4 4.79 0.75 
 -5 -8 4 5.74 0.79 
 5 8 -4 6.58 0.88 
 -5 8 4 4.07 0.7 
 -5 8 4 5.02 0.83 
 -5 8 4 5.67 0.68 
 -4 -8 4 38.4 1.55 
 4 -8 -4 37.15 1.65 
 -4 -8 4 38.58 1.21 
 -4 -8 4 37.87 1.22 
 -4 -8 4 40.38 1.69 
 -4 -8 4 41.62 1.61 
 -4 8 4 38.49 1.52 
 4 8 -4 36.05 1.74 
 -4 8 4 35.77 1.67 
 -4 8 4 37.89 1.79 
 -3 -8 4 16.31 0.97 
 3 -8 -4 16.95 1.09 
 3 -8 -4 15.42 0.82 
 -3 -8 4 17.31 1.01 
 -3 -8 4 16.98 0.56 
 -3 -8 4 15.9 0.96 
 -3 8 4 16.67 1.03 
 -3 8 4 14.89 1.08 
 -3 8 4 15.94 0.83 
 3 8 -4 16.58 1.11 
 2 -8 -4 19.87 0.8 
 2 -8 -4 17.67 1.07 
 -2 -8 4 17.77 0.61 
 -2 -8 4 17.84 1.03 
 -2 -8 4 18.36 1.04 
 2 -8 -4 18.47 1.11 
 -2 8 4 18.12 1.11 
 -2 8 4 18.26 0.78 
 2 8 -4 17.76 1.13 
 -1 -8 4 0.92 0.22 
 -1 -8 4 0.58 0.33 
 -1 -8 4 0.43 0.46 
 1 -8 -4 0.77 0.21 
 -1 -8 4 1.4 0.47 
 1 -8 -4 0.6 0.49 
 1 -8 -4 0.5 0.41 
 -1 8 4 1.48 0.53 
 1 8 -4 0.57 0.52 
 0 -8 -4 0.59 0.39 
 0 -8 4 0.24 0.45 
 0 -8 -4 0.68 0.53 
 0 -8 4 0.52 0.27 
 0 -8 4 0.2 0.29 
 0 8 4 0.68 0.47 
 0 8 -4 0.49 0.46 
 0 8 -4 0.81 0.24 
 -1 -8 -4 -0.21 0.36 
 1 -8 4 0.22 0.44 
 -1 -8 -4 -0.09 0.42 
 1 -8 4 -0.22 0.23 
 1 -8 4 0.32 0.32 
 -1 8 -4 0.14 0.53 
 -1 8 -4 0.16 0.3 
 2 -8 4 54.23 1.92 
 -2 -8 -4 55.06 1.96 
 2 -8 4 52.72 2.14 
 -2 -8 -4 52.42 2.09 
 2 -8 4 53.14 1.66 
 -2 -8 -4 56.33 1.57 
 -2 8 -4 54.57 1.89 
 -2 8 -4 53.06 2.12 
 -3 -8 -4 6.47 0.42 
 -3 -8 -4 5.85 0.78 
 3 -8 4 4.09 0.71 
 3 -8 4 7.25 0.42 
 3 -8 4 4.99 0.63 
 -3 -8 -4 4.72 0.6 
 -3 8 -4 7.63 0.89 
 3 8 4 5.88 0.44 
 -3 8 -4 5.68 0.43 
 -3 8 -4 6.01 0.65 
 -4 -8 -4 2.54 0.36 
 4 -8 4 1.44 0.51 
 4 -8 4 1.67 0.65 
 -4 -8 -4 1.07 0.53 
 4 -8 4 1.89 0.31 
 -4 -8 -4 1.25 0.44 
 -4 8 -4 1.73 0.3 
 4 8 4 1.89 0.38 
 -4 8 -4 2.11 0.68 
 -4 8 -4 1.27 0.5 
 5 -8 4 0.93 0.51 
 -5 -8 -4 1.39 0.49 
 5 -8 4 0.64 0.6 
 -5 -8 -4 2.64 0.68 
 -5 -8 -4 1.3 0.39 
 -5 8 -4 1.73 0.33 
 -5 8 -4 1.73 0.66 
 6 -8 4 5.49 0.89 
 6 -8 4 7.49 0.94 
 -6 -8 -4 5.66 0.83 
 -6 -8 -4 6.94 0.79 
 -6 -8 -4 6.81 0.69 
 -6 8 -4 6.83 0.56 
 -6 8 -4 7.27 0.86 
 6 8 4 7.96 0.73 
 -6 8 -4 6.37 0.96 
 -7 -8 -4 0.76 0.54 
 7 -8 4 2.36 0.75 
 -7 -8 -4 0.52 0.6 
 -7 -8 -4 1.67 0.55 
 -7 8 -4 0.56 0.55 
 -7 8 -4 1.73 0.71 
 -8 -8 -4 5.4 0.98 
 8 -8 4 3.59 0.9 
 -8 -8 -4 4.17 0.79 
 -8 -8 -4 5.52 0.8 
 -8 8 -4 4.45 0.92 
 -9 -8 -4 -0.3 0.6 
 -9 -8 -4 0.43 0.66 
 9 -8 4 -0.71 0.65 
 -9 -8 -4 0.18 0.78 
 -9 8 -4 -0.89 0.67 
 -10 -8 -4 4.09 0.88 
 -10 -8 -4 6.77 1.18 
 10 -8 4 3.85 0.95 
 -10 -8 -4 4.92 0.94 
 -10 8 -4 3.74 1.05 
 -11 -8 -4 -0.45 0.68 
 -11 -8 -4 -0.11 0.83 
 11 -8 4 0.8 0.86 
 -11 -8 -4 0.24 0.83 
 -11 8 -4 -0.07 0.84 
 -12 -8 -4 2.61 0.96 
 -12 -8 -4 4.63 1.08 
 -12 -8 -4 3.26 1.09 
 -12 8 -4 2.02 1.14 
 -13 -8 -4 0.85 1 
 -13 -8 -4 1.2 0.95 
 -13 -8 -4 -0.43 0.92 
 -13 8 -4 -0.01 1.12 
 -13 -9 4 2.26 1.2 
 -13 -9 4 0.03 0.79 
 -13 9 4 -0.15 1.08 
 -12 -9 4 0.86 0.74 
 -12 -9 4 0.71 1.02 
 -12 9 4 1.47 1.01 
 -11 -9 4 4.87 1.16 
 -11 -9 4 3.37 0.8 
 -11 9 4 2.62 1.05 
 10 -9 -4 1.36 0.68 
 -10 -9 4 -0.58 0.82 
 10 -9 -4 1.53 0.83 
 -10 -9 4 1.07 0.6 
 -10 9 4 1.31 0.91 
 -9 -9 4 8.5 1.22 
 -9 -9 4 8.49 0.85 
 9 -9 -4 7.72 0.96 
 -9 -9 4 8.49 0.84 
 9 -9 -4 9.36 1.19 
 9 9 -4 8.69 1.2 
 -9 9 4 7.8 1.15 
 -8 -9 4 0.58 0.45 
 -8 -9 4 0.29 0.62 
 8 -9 -4 -0.01 0.65 
 -8 -9 4 1.05 0.47 
 -8 -9 4 -0.06 0.39 
 8 -9 -4 0.49 0.57 
 -8 9 4 0.17 0.66 
 -8 9 4 0.67 0.8 
 -8 9 4 0.27 0.62 
 8 9 -4 -1.07 0.61 
 -7 -9 4 3.32 0.78 
 7 -9 -4 6.12 0.85 
 -7 -9 4 4.09 0.53 
 -7 -9 4 4.12 0.65 
 -7 -9 4 5.03 0.61 
 7 -9 -4 3.5 0.81 
 -7 9 4 4.77 0.87 
 -7 9 4 3.95 0.77 
 7 9 -4 4.5 0.85 
 -7 9 4 5.45 0.9 
 -6 -9 4 8.47 0.91 
 -6 -9 4 10.09 0.81 
 6 -9 -4 7.14 0.91 
 -6 -9 4 8.71 0.83 
 -6 -9 4 8.89 0.63 
 6 9 -4 8.97 1.03 
 -6 9 4 8.78 0.91 
 -6 9 4 7.48 0.98 
 -6 9 4 8.22 0.93 
 5 -9 -4 1.01 0.56 
 -5 -9 4 0.58 0.24 
 -5 -9 4 0.24 0.42 
 -5 -9 4 0.76 0.27 
 -5 -9 4 0.47 0.5 
 -5 -9 4 1.55 0.48 
 -5 9 4 0.86 0.55 
 -5 9 4 0.39 0.54 
 -5 9 4 0.64 0.49 
 5 9 -4 0.72 0.59 
 -4 -9 4 3.93 0.58 
 -4 -9 4 3.51 0.6 
 4 -9 -4 3.73 0.67 
 -4 -9 4 3.91 0.27 
 -4 -9 4 3.84 0.28 
 -4 -9 4 3.8 0.59 
 -4 9 4 4.7 0.58 
 4 9 -4 3.5 0.68 
 -4 9 4 4.18 0.79 
 -4 9 4 3.92 0.66 
 3 -9 -4 15.02 0.79 
 -3 -9 4 16.95 1 
 3 -9 -4 13.62 1.06 
 -3 -9 4 15.46 0.96 
 -3 -9 4 14.84 1 
 -3 9 4 12.93 0.79 
 3 9 -4 14.22 1.07 
 -3 9 4 14.83 1.16 
 -2 -9 4 118.97 3.57 
 -2 -9 4 116.61 3.72 
 2 -9 -4 106.07 3.67 
 2 -9 -4 114.55 3.36 
 2 -9 -4 118.71 3.76 
 -2 -9 4 117.75 3.74 
 -2 9 4 118.26 3.7 
 2 9 -4 111.32 3.79 
 -2 9 4 112.86 3.36 
 -2 9 4 108.78 3.75 
 -1 -9 4 1.47 0.23 
 -1 -9 4 1.93 0.54 
 1 -9 -4 0.84 0.44 
 1 -9 -4 1.52 0.57 
 1 -9 -4 1.77 0.24 
 -1 -9 4 1.32 0.38 
 1 9 -4 1.62 0.59 
 -1 9 4 1.51 0.51 
 0 -9 4 73.56 2.71 
 0 -9 4 76.42 2.34 
 0 -9 -4 76.02 2.7 
 0 -9 4 74.89 2.39 
 0 -9 -4 78.34 2.59 
 0 9 4 75.71 2.55 
 0 9 -4 76.32 2.74 
 -1 -9 -4 2.8 0.62 
 1 -9 4 2.92 0.43 
 1 -9 4 2.67 0.37 
 1 -9 4 2.36 0.59 
 -1 -9 -4 2.79 0.51 
 -1 9 -4 3.44 0.43 
 -1 9 -4 4.45 0.77 
 -2 -9 -4 1.92 0.6 
 2 -9 4 2.2 0.31 
 -2 -9 -4 1.65 0.47 
 2 -9 4 2.04 0.47 
 2 -9 4 2 0.63 
 -2 9 -4 2.52 0.68 
 -2 9 -4 2.83 0.46 
 -3 -9 -4 9.07 0.95 
 3 -9 4 10.41 0.54 
 3 -9 4 8.81 0.79 
 3 -9 4 8.54 0.97 
 -3 -9 -4 8.72 0.76 
 -3 -9 -4 9.06 0.48 
 -3 9 -4 10.92 1.06 
 -3 9 -4 8.68 0.55 
 -3 9 -4 8.92 0.75 
 4 -9 4 1.63 0.6 
 4 -9 4 2.22 0.54 
 -4 -9 -4 2.76 0.67 
 -4 -9 -4 2.03 0.33 
 -4 -9 -4 2.44 0.51 
 4 -9 4 2.2 0.34 
 -4 9 -4 2.55 0.36 
 -4 9 -4 2.74 0.72 
 -4 9 -4 1.41 0.5 
 4 9 4 2.33 0.38 
 -5 -9 -4 1.89 0.68 
 5 -9 4 3.84 0.44 
 -5 -9 -4 3.25 0.61 
 5 -9 4 3.4 0.66 
 -5 -9 -4 4.23 0.48 
 5 -9 4 2.15 0.74 
 5 9 4 3.25 0.59 
 -5 9 -4 2.65 0.74 
 5 9 4 3.62 0.55 
 -5 9 -4 4.14 0.43 
 -5 9 -4 4.07 0.63 
 -5 9 -4 2.52 0.73 
 6 -9 4 0.31 0.58 
 6 -9 4 0.99 0.67 
 -6 -9 -4 1.98 0.73 
 -6 -9 -4 1.26 0.52 
 -6 -9 -4 1.33 0.45 
 -6 9 -4 -0.28 0.35 
 6 9 4 -0.29 0.41 
 -6 9 -4 0.61 0.68 
 -7 -9 -4 19.1 1.54 
 -7 -9 -4 17.25 1.21 
 -7 -9 -4 18.04 1.12 
 7 -9 4 18.22 1.45 
 -7 9 -4 14.91 1.37 
 -8 -9 -4 0.3 0.55 
 -8 -9 -4 0.97 0.59 
 8 -9 4 0.92 0.75 
 -8 -9 -4 -1.12 0.67 
 -8 9 -4 -0.37 0.75 
 -9 -9 -4 11.77 1.36 
 -9 -9 -4 11.03 1.14 
 -9 -9 -4 10.46 1.16 
 9 -9 4 11.07 1.3 
 -9 9 -4 11.66 1.47 
 10 -9 4 14.69 1.49 
 -10 -9 -4 14.02 1.36 
 -10 -9 -4 13.86 1.33 
 -10 -9 -4 13.66 1.53 
 -10 9 -4 14.35 1.64 
 -11 -9 -4 0.13 0.77 
 -11 -9 -4 0.72 0.95 
 11 -9 4 0.7 0.82 
 -11 -9 -4 -0.01 0.75 
 -11 9 -4 0.18 0.89 
 -12 -9 -4 1.81 0.89 
 12 -9 4 1.62 1.33 
 -12 -9 -4 2.45 1.14 
 -12 -9 -4 2.31 1.01 
 -12 9 -4 1.57 1.2 
 -13 -10 4 1.29 0.84 
 -12 -10 4 3.81 0.9 
 -12 -10 4 4.87 1.2 
 -12 10 4 4.33 1.13 
 -11 -10 4 5.09 0.87 
 -11 -10 4 5.85 1.24 
 11 -10 -4 5.39 1.15 
 -11 10 4 5.28 1.21 
 -10 -10 4 6.15 0.81 
 10 -10 -4 4.15 0.88 
 -10 -10 4 5.59 1.06 
 10 -10 -4 5.17 1.08 
 -10 10 4 2.84 1 
 9 -10 -4 1.24 0.68 
 -9 -10 4 2.22 0.82 
 9 -10 -4 2.17 0.87 
 -9 -10 4 3.36 0.63 
 -9 -10 4 2.29 0.6 
 -9 10 4 1.94 0.86 
 9 10 -4 3.01 0.98 
 -8 -10 4 1.38 0.48 
 8 -10 -4 1.57 0.66 
 8 -10 -4 1.75 0.75 
 -8 -10 4 2.85 0.81 
 -8 -10 4 1.02 0.51 
 -8 -10 4 0.64 0.51 
 -8 10 4 1.1 0.7 
 8 10 -4 4.15 0.96 
 -7 -10 4 12.33 1.2 
 -7 -10 4 11.99 0.96 
 7 -10 -4 11.01 1.15 
 -7 -10 4 13.13 0.95 
 -7 -10 4 10.53 0.77 
 7 -10 -4 10.49 1.08 
 -7 10 4 14.28 1.22 
 7 10 -4 13.75 1.37 
 -6 -10 4 1.03 0.33 
 -6 -10 4 1.08 0.48 
 -6 -10 4 1.43 0.51 
 -6 -10 4 1.19 0.6 
 6 -10 -4 1.54 0.65 
 6 10 -4 0.87 0.61 
 -6 10 4 1.53 0.61 
 -6 10 4 -0.27 0.5 
 -5 -10 4 2.93 0.29 
 -5 -10 4 2.46 0.27 
 -5 -10 4 2.88 0.58 
 -5 -10 4 2.59 0.59 
 5 -10 -4 2.6 0.71 
 -5 -10 4 3.32 0.68 
 -5 10 4 2.23 0.69 
 -5 10 4 2.35 0.56 
 5 10 -4 2.46 0.74 
 -5 10 4 1.92 0.59 
 -4 -10 4 15.56 1.07 
 4 -10 -4 15.76 1.16 
 -4 -10 4 15.35 1.04 
 -4 -10 4 15.65 1.03 
 -4 10 4 15.1 0.9 
 4 10 -4 14.18 1.17 
 -4 10 4 14.1 1.23 
 -4 10 4 15.12 1.03 
 3 -10 -4 2.85 0.64 
 -3 -10 4 1.67 0.48 
 -3 -10 4 2.43 0.56 
 3 -10 -4 1.86 0.4 
 -3 -10 4 2.25 0.55 
 -3 -10 4 1.76 0.51 
 -3 10 4 1.41 0.41 
 3 10 -4 2.03 0.64 
 -3 10 4 1.27 0.41 
 -2 -10 4 50.66 2.01 
 -2 -10 4 49.04 1.86 
 -2 -10 4 51.36 2.03 
 2 -10 -4 52.4 2.08 
 2 -10 -4 50.62 2 
 2 -10 -4 50.74 1.65 
 -2 10 4 50.6 1.95 
 2 10 -4 47.58 2.08 
 -2 10 4 49.02 1.66 
 1 -10 -4 10.19 0.49 
 1 -10 -4 8.8 0.87 
 -1 -10 4 10.28 0.74 
 1 -10 -4 11.77 0.96 
 -1 -10 4 8.72 0.87 
 -1 -10 4 10.35 0.51 
 -1 10 4 11.11 0.93 
 1 10 -4 9.13 0.97 
 0 -10 4 20.57 0.97 
 0 -10 -4 21.93 1.22 
 0 -10 -4 18.82 1.11 
 0 -10 4 21.78 0.9 
 0 -10 4 23.29 1.35 
 0 10 -4 21.03 1.25 
 0 10 4 21.08 1.15 
 1 -10 4 2.55 0.69 
 -1 -10 -4 2.56 0.52 
 1 -10 4 3.64 0.48 
 -1 -10 -4 2.35 0.63 
 1 -10 4 2.26 0.39 
 -1 10 -4 3.07 0.71 
 -1 10 -4 3.02 0.43 
 1 10 4 4.17 0.6 
 2 -10 4 8.41 1.01 
 -2 -10 -4 10.13 1 
 2 -10 4 7.76 0.55 
 2 -10 4 9.47 0.75 
 -2 -10 -4 10.11 0.81 
 -2 10 -4 11.21 1.1 
 -2 10 -4 9.14 0.7 
 2 10 4 8.7 0.78 
 3 -10 4 24.75 0.95 
 -3 -10 -4 25.14 1.44 
 -3 -10 -4 23.27 1.21 
 3 -10 4 23.82 1.24 
 3 -10 4 24.47 1.51 
 -3 -10 -4 24.73 0.87 
 3 10 4 23.92 1.15 
 -3 10 -4 23.76 1.18 
 -3 10 -4 23.07 1.39 
 -3 10 -4 25.36 0.99 
 4 -10 4 40.06 1.43 
 -4 -10 -4 41.08 1.69 
 -4 -10 -4 38.99 1.92 
 4 -10 4 41.13 1.8 
 4 -10 4 40.22 2.01 
 -4 -10 -4 41.69 1.42 
 -4 10 -4 42.75 1.98 
 -4 10 -4 43.27 1.45 
 -4 10 -4 42.61 1.75 
 4 10 4 42.95 1.66 
 5 -10 4 35.39 1.89 
 5 -10 4 32.93 1.68 
 -5 -10 -4 34.52 1.35 
 -5 -10 -4 35.4 1.84 
 -5 -10 -4 34.58 1.56 
 5 -10 4 34.64 1.32 
 5 10 4 36.98 1.51 
 5 10 4 37.93 1.47 
 -5 10 -4 34.46 1.85 
 -5 10 -4 35.82 1.3 
 -5 10 -4 33.6 1.66 
 -6 -10 -4 5.1 0.63 
 6 -10 4 5.23 0.97 
 -6 -10 -4 5.13 0.74 
 -6 -10 -4 4.66 0.94 
 6 10 4 6.64 0.74 
 -6 10 -4 5.62 0.97 
 -7 -10 -4 7.44 0.79 
 -7 -10 -4 7.11 1.12 
 7 -10 4 5.9 1.03 
 -7 -10 -4 5.9 0.84 
 7 10 4 9.09 0.92 
 -7 10 -4 6.42 1.03 
 8 -10 4 0.83 0.79 
 -8 -10 -4 -0.02 0.55 
 -8 -10 -4 0.78 0.79 
 -8 -10 -4 0.38 0.6 
 -8 10 -4 -0.07 0.8 
 -9 -10 -4 -0.03 0.63 
 -9 -10 -4 -0.2 0.78 
 9 -10 4 0.25 0.78 
 -9 -10 -4 0.42 0.66 
 -9 10 -4 -0.2 0.75 
 -10 -10 -4 8.96 1.16 
 -10 -10 -4 8.49 1.31 
 -10 -10 -4 9.91 1.16 
 10 -10 4 9.54 1.34 
 -10 10 -4 6.51 1.31 
 -11 -10 -4 -0.85 0.89 
 11 -10 4 1.79 0.97 
 -11 -10 -4 0.95 0.81 
 -11 -10 -4 -0.13 0.74 
 -11 10 -4 0.48 1.02 
 -12 -10 -4 0.58 0.85 
 12 -10 4 4.35 1.36 
 -12 -10 -4 4.23 1.11 
 -12 -10 -4 2.19 1.06 
 -12 10 -4 3.86 1.32 
 -12 -11 4 0.87 0.71 
 -12 -11 4 3.79 1.22 
 -12 11 4 -1.37 0.94 
 -11 -11 4 6.45 0.91 
 -11 -11 4 7.11 1.24 
 11 -11 -4 6.56 1.21 
 -11 11 4 7.69 1.35 
 -10 -11 4 0.24 0.56 
 10 -11 -4 1.78 0.93 
 -10 -11 4 1.14 0.91 
 10 -11 -4 1.45 0.77 
 10 11 -4 0.65 0.86 
 -10 11 4 1.08 0.87 
 -9 -11 4 14.72 1.46 
 9 -11 -4 12.1 1.27 
 9 -11 -4 11.53 1.36 
 -9 -11 4 12.63 1.02 
 -9 11 4 12.84 1.37 
 9 11 -4 12.05 1.45 
 -8 -11 4 0.78 0.51 
 8 -11 -4 0.09 0.65 
 -8 -11 4 1.07 0.44 
 -8 -11 4 1.57 0.56 
 8 -11 -4 0.19 0.73 
 -8 -11 4 0.6 0.73 
 8 11 -4 1.14 0.83 
 -8 11 4 0.64 0.69 
 -7 -11 4 19.78 0.94 
 -7 -11 4 18.53 1.19 
 7 -11 -4 18.16 1.4 
 -7 -11 4 21.68 1.46 
 7 -11 -4 20.42 1.49 
 -7 -11 4 19.2 1.19 
 7 11 -4 20.39 1.51 
 -7 11 4 19.04 1.33 
 6 -11 -4 11.12 1.1 
 -6 -11 4 11.91 1 
 -6 -11 4 11.46 0.6 
 -6 -11 4 9.76 0.96 
 -6 -11 4 10.53 1.07 
 -6 -11 4 11.08 0.59 
 -6 11 4 10.46 0.98 
 6 11 -4 8.27 1.12 
 -5 -11 4 0.45 0.48 
 -5 -11 4 -0.07 0.44 
 5 -11 -4 -0.22 0.58 
 -5 -11 4 1.19 0.54 
 5 11 -4 0.41 0.64 
 -5 11 4 0.75 0.52 
 -5 11 4 0.92 0.49 
 -4 -11 4 5.42 0.75 
 4 -11 -4 3.78 0.75 
 -4 -11 4 5.21 0.73 
 -4 -11 4 5.86 0.75 
 -4 -11 4 4.46 0.7 
 4 11 -4 4.74 0.86 
 -4 11 4 5.85 0.66 
 -3 -11 4 5.99 0.77 
 -3 -11 4 6.94 0.76 
 -3 -11 4 6.56 0.77 
 3 -11 -4 9.42 1.01 
 3 -11 -4 6.68 0.6 
 -3 -11 4 6.74 0.77 
 -3 11 4 6.05 0.61 
 3 11 -4 8.11 1.01 
 -3 11 4 6.48 0.75 
 -2 -11 4 2.74 0.61 
 -2 -11 4 3.71 0.58 
 2 -11 -4 1.87 0.66 
 2 -11 -4 2.27 0.37 
 -2 -11 4 2.41 0.58 
 2 -11 -4 1.88 0.56 
 2 11 -4 3.62 0.77 
 -2 11 4 2.72 0.55 
 1 -11 -4 5.01 0.74 
 1 -11 -4 4.94 0.7 
 -1 -11 4 6.1 0.83 
 -1 -11 4 6.09 0.42 
 1 -11 -4 5.35 0.39 
 -1 -11 4 5.84 0.63 
 1 11 -4 6.33 0.86 
 -1 11 4 6.29 0.8 
 -1 11 4 5.55 0.69 
 0 -11 -4 4.07 0.59 
 0 -11 -4 3.38 0.67 
 0 -11 4 5.71 0.5 
 0 -11 4 4.69 0.54 
 0 -11 4 3.53 0.74 
 0 11 4 6.41 0.77 
 0 11 -4 4.76 0.84 
 -1 -11 -4 42.91 1.89 
 1 -11 4 42.33 2.01 
 1 -11 4 43.56 1.6 
 1 -11 4 43.71 1.55 
 -1 -11 -4 41.99 1.72 
 -1 11 -4 42.79 1.99 
 1 11 4 42.34 1.76 
 2 -11 4 6.58 0.68 
 -2 -11 -4 5.51 0.64 
 2 -11 4 5.57 0.91 
 -2 -11 -4 7.45 0.91 
 2 -11 4 6.62 0.55 
 -2 11 -4 7.3 0.63 
 2 11 4 7.78 0.76 
 -2 11 -4 5.84 0.89 
 -3 -11 -4 7.74 0.9 
 -3 -11 -4 6.99 0.71 
 3 -11 4 6.45 0.93 
 3 -11 4 7.7 0.81 
 3 -11 4 8.01 0.57 
 -3 -11 -4 7.37 0.44 
 -3 11 -4 7.55 0.7 
 -3 11 -4 7.57 0.6 
 -3 11 -4 7.14 0.96 
 3 11 4 9.19 0.84 
 4 -11 4 1.31 0.72 
 -4 -11 -4 0.4 0.45 
 4 -11 4 -0.24 0.49 
 -4 -11 -4 1 0.59 
 4 -11 4 1.14 0.33 
 -4 -11 -4 0.63 0.26 
 -4 11 -4 1.56 0.35 
 -4 11 -4 1.47 0.69 
 -4 11 -4 0.46 0.53 
 4 11 4 0.52 0.46 
 5 -11 4 3.73 0.88 
 5 -11 4 4.52 0.77 
 5 -11 4 4.08 0.5 
 -5 -11 -4 3.36 0.62 
 -5 -11 -4 4.37 0.5 
 -5 -11 -4 3.43 0.85 
 5 11 4 5.39 0.7 
 -5 11 -4 5.67 0.98 
 -6 -11 -4 3.54 0.66 
 -6 -11 -4 3.53 0.56 
 6 -11 4 3.53 0.52 
 -6 -11 -4 4.09 0.94 
 6 -11 4 3.44 0.85 
 6 11 4 3 0.62 
 -6 11 -4 3.76 0.9 
 -7 -11 -4 13.48 1.01 
 -7 -11 -4 11.74 1.38 
 -7 -11 -4 13.08 1.11 
 7 -11 4 12.74 1.39 
 -7 11 -4 14.86 1.47 
 -8 -11 -4 1.94 0.94 
 -8 -11 -4 2.93 0.68 
 -8 -11 -4 2.43 0.71 
 8 -11 4 2.63 0.92 
 -8 11 -4 1.61 0.8 
 -9 -11 -4 3.62 0.81 
 -9 -11 -4 4.79 1.12 
 9 -11 4 4.06 1.02 
 -9 -11 -4 4.3 0.88 
 -9 11 -4 4.65 1.13 
 -10 -11 -4 1.99 0.78 
 -10 -11 -4 3.12 1.08 
 -10 -11 -4 1.46 0.81 
 10 -11 4 2.98 1.05 
 -10 11 -4 2.44 1.11 
 -11 -11 -4 2.49 1.49 
 -11 -11 -4 1.77 1.11 
 -11 -11 -4 1.23 0.84 
 11 -11 4 1.27 0.96 
 -11 11 -4 1.87 1.14 
 -12 -11 -4 2.13 0.93 
 -12 -11 -4 0.58 1.11 
 12 -11 4 2.19 1.07 
 -12 11 -4 0.36 1.12 
 -12 -12 4 -0.28 0.64 
 -12 -12 4 -0.89 0.91 
 -12 12 4 -0.45 0.91 
 -11 -12 4 5.67 1.17 
 -11 -12 4 5.22 0.85 
 11 -12 -4 5.23 1.16 
 -11 12 4 5.41 1.19 
 10 -12 -4 0.58 0.71 
 -10 -12 4 -0.01 0.83 
 10 -12 -4 -0.91 0.82 
 -10 -12 4 0.55 0.54 
 10 12 -4 -0.77 0.89 
 -10 12 4 0.92 0.82 
 -9 -12 4 2.2 0.89 
 9 -12 -4 0.46 0.73 
 9 -12 -4 1.15 0.85 
 -9 -12 4 0.34 0.49 
 -9 12 4 -0.24 0.74 
 9 12 -4 1.96 0.94 
 -8 -12 4 4.19 0.94 
 -8 -12 4 3.59 0.71 
 8 -12 -4 3.11 0.85 
 8 -12 -4 0.82 0.81 
 -8 -12 4 2.37 0.65 
 -8 -12 4 3.58 0.52 
 -8 12 4 3.66 0.86 
 8 12 -4 3.39 0.94 
 7 -12 -4 18.42 1.5 
 7 -12 -4 19.95 1.49 
 -7 -12 4 19.17 0.86 
 -7 -12 4 18.6 0.86 
 -7 -12 4 21.28 1.44 
 -7 -12 4 16.75 1.19 
 -7 -12 4 19.14 1.29 
 7 12 -4 18.62 1.66 
 -7 12 4 18.25 1.35 
 -6 -12 4 7.88 1.04 
 -6 -12 4 8.47 0.92 
 6 -12 -4 6.17 0.96 
 -6 -12 4 6.87 0.41 
 -6 -12 4 6.75 0.88 
 -6 -12 4 6.35 0.4 
 -6 -12 4 7.08 0.89 
 -6 12 4 6.47 0.87 
 6 12 -4 7.4 1.08 
 -5 -12 4 4.79 0.76 
 5 -12 -4 2.79 0.76 
 -5 -12 4 3.48 0.75 
 -5 -12 4 2.41 0.62 
 -5 -12 4 4.37 0.73 
 5 12 -4 4.57 0.94 
 -5 12 4 4.01 0.66 
 4 -12 -4 5.99 0.88 
 -4 -12 4 5.61 0.79 
 -4 -12 4 6.02 0.81 
 -4 -12 4 6.88 0.86 
 -4 -12 4 6.32 0.82 
 -4 12 4 5.76 0.67 
 4 12 -4 5.73 0.94 
 -3 -12 4 7.17 0.82 
 -3 -12 4 8.41 0.89 
 3 -12 -4 7.33 0.63 
 3 -12 -4 4.53 0.8 
 -3 -12 4 5.92 0.83 
 -3 -12 4 6.72 0.77 
 3 12 -4 5.1 0.85 
 -3 12 4 8.17 0.97 
 -2 -12 4 7.35 0.75 
 -2 -12 4 9.04 1 
 2 -12 -4 8.92 0.97 
 2 -12 -4 7.09 0.81 
 2 -12 -4 8.18 0.58 
 -2 -12 4 6.9 0.84 
 -2 12 4 9.25 0.99 
 2 12 -4 9.11 1.07 
 -2 12 4 8.02 0.81 
 1 -12 -4 10.15 1.07 
 1 -12 -4 11.03 0.56 
 1 -12 -4 10.08 0.91 
 -1 -12 4 12.89 1.18 
 -1 -12 4 12.46 0.6 
 -1 -12 4 11.63 0.83 
 -1 12 4 11.22 0.87 
 -1 12 4 13 1.09 
 1 12 -4 10.88 1.11 
 0 -12 4 4.75 0.48 
 0 -12 -4 3.95 0.31 
 0 -12 -4 4.38 0.77 
 0 -12 4 5.08 0.89 
 0 -12 -4 2.09 0.53 
 0 -12 -4 3.79 0.27 
 0 -12 4 2.92 0.5 
 0 12 4 4.6 0.7 
 0 12 -4 4.95 0.85 
 -1 -12 -4 0.87 0.47 
 1 -12 4 1.41 0.42 
 -1 -12 -4 0.72 0.59 
 1 -12 4 1.96 0.66 
 1 -12 4 0.94 0.37 
 1 12 4 1.84 0.56 
 -1 12 -4 1.22 0.63 
 2 -12 4 4.44 0.62 
 2 -12 4 3.47 0.84 
 2 -12 4 3.89 0.48 
 -2 -12 -4 3.96 0.6 
 -2 -12 -4 4.7 0.84 
 2 12 4 4.03 0.66 
 -2 12 -4 4.27 0.89 
 3 -12 4 48.94 1.7 
 3 -12 4 52 2 
 -3 -12 -4 48.19 1.53 
 -3 -12 -4 50.91 1.93 
 3 -12 4 43.1 2.2 
 -3 -12 -4 49.59 2.18 
 -3 12 -4 47.31 2.25 
 -3 12 -4 50.55 1.98 
 3 12 4 51.4 1.95 
 4 -12 4 12.17 1.34 
 -4 -12 -4 10.52 1.2 
 -4 -12 -4 11.29 0.63 
 -4 -12 -4 12.49 0.97 
 4 -12 4 12.76 0.76 
 4 -12 4 12.51 1.05 
 4 12 4 12.68 1 
 -4 12 -4 10.68 1.23 
 -5 -12 -4 62.79 2.14 
 -5 -12 -4 62.8 2.73 
 -5 -12 -4 63.34 2.4 
 5 -12 4 67.69 2.89 
 5 -12 4 64.44 2.16 
 5 12 4 65.09 2.39 
 -5 12 -4 67.81 2.81 
 -6 -12 -4 0.23 0.51 
 -6 -12 -4 0.69 0.4 
 6 -12 4 0.28 0.77 
 6 -12 4 0.08 0.39 
 -6 -12 -4 -0.96 0.68 
 -6 12 -4 0.5 0.81 
 6 12 4 0.43 0.49 
 -7 -12 -4 0.1 0.52 
 -7 -12 -4 -1.45 0.71 
 7 -12 4 0.15 0.75 
 -7 -12 -4 0.43 0.47 
 -7 12 -4 -0.45 0.77 
 -8 -12 -4 2.07 0.65 
 -8 -12 -4 1 0.66 
 8 -12 4 1.71 0.93 
 -8 -12 -4 1.71 0.91 
 -8 12 -4 1.93 0.84 
 -9 -12 -4 1.78 0.73 
 9 -12 4 1.65 0.95 
 -9 -12 -4 1.76 1 
 -9 12 -4 1.35 1.02 
 -10 -12 -4 1.53 0.78 
 -10 -12 -4 1.42 1.06 
 10 -12 4 1.26 0.96 
 -10 12 -4 -0.59 0.92 
 -11 -12 -4 3.55 0.94 
 11 -12 4 1.14 1 
 -11 -12 -4 2.95 1.11 
 -11 12 -4 1.45 1.21 
 -11 -13 4 2.45 1.04 
 -11 -13 4 1.32 0.64 
 11 -13 -4 2.27 1.05 
 11 13 -4 1.79 1.11 
 -11 13 4 1.35 0.96 
 10 -13 -4 2.16 0.92 
 10 -13 -4 2.57 1.06 
 -10 -13 4 2.7 0.63 
 -10 -13 4 2.8 1 
 -10 13 4 2.12 0.97 
 10 13 -4 1.66 1.05 
 -9 -13 4 15.9 1.01 
 -9 -13 4 14.76 1.53 
 9 -13 -4 13.51 1.5 
 9 -13 -4 14.36 1.47 
 9 13 -4 14.04 1.66 
 -9 13 4 16.54 1.53 
 -8 -13 4 0.45 0.58 
 8 -13 -4 0.37 0.79 
 -8 -13 4 0.56 0.59 
 8 -13 -4 1.18 0.86 
 -8 -13 4 -0.36 0.84 
 -8 -13 4 0.54 0.37 
 -8 -13 4 2.3 0.76 
 -8 -13 4 0.71 0.35 
 -8 13 4 -0.08 0.69 
 8 13 -4 0.39 0.81 
 -7 -13 4 13.24 1.29 
 -7 -13 4 11.67 1.11 
 -7 -13 4 12.7 0.62 
 -7 -13 4 10.98 1.09 
 -7 -13 4 12.49 0.61 
 7 -13 -4 12.41 1.3 
 -7 -13 4 12.97 1.41 
 7 -13 -4 13.2 1.41 
 -7 13 4 12.48 1.23 
 7 13 -4 12.82 1.42 
 -6 -13 4 1.41 0.78 
 6 -13 -4 2.07 0.81 
 -6 -13 4 2.21 0.7 
 -6 -13 4 2.66 0.71 
 -6 -13 4 2.17 0.69 
 6 13 -4 2.34 0.85 
 -6 13 4 1.12 0.61 
 -5 -13 4 1.85 0.63 
 5 -13 -4 1.41 0.77 
 -5 -13 4 2.26 0.7 
 -5 -13 4 1.41 0.61 
 -5 -13 4 1.58 0.61 
 -5 13 4 1.72 0.56 
 5 13 -4 -0.13 0.66 
 -4 -13 4 2.54 0.66 
 4 -13 -4 4.23 0.84 
 -4 -13 4 3.79 0.73 
 -4 -13 4 2.93 0.67 
 -4 -13 4 4.13 0.75 
 -4 13 4 3.72 0.58 
 4 13 -4 2.57 0.82 
 -3 -13 4 0.84 0.52 
 -3 -13 4 2.04 0.64 
 -3 -13 4 1.07 0.52 
 3 -13 -4 0.49 0.62 
 -3 -13 4 1.43 0.56 
 3 13 -4 -0.34 0.58 
 -2 -13 4 2.5 0.55 
 2 -13 -4 1.41 0.66 
 2 -13 -4 1.42 0.51 
 -2 -13 4 1.22 0.57 
 -2 -13 4 1.35 0.59 
 2 13 -4 1.66 0.66 
 -2 13 4 1.18 0.67 
 1 -13 -4 5.32 0.43 
 -1 -13 4 6.03 0.92 
 1 -13 -4 5.76 0.86 
 -1 -13 4 5.76 0.68 
 1 -13 -4 4.44 0.7 
 1 13 -4 4.51 0.91 
 -1 13 4 5.73 0.86 
 0 -13 4 1.31 0.36 
 0 -13 -4 1.6 0.25 
 0 -13 -4 0.7 0.2 
 0 -13 -4 0.22 0.61 
 0 -13 4 1.07 0.63 
 0 -13 4 1.58 0.43 
 0 -13 -4 0.98 0.51 
 0 13 4 0.96 0.53 
 0 13 -4 1.6 0.71 
 1 -13 4 7.31 1.02 
 1 -13 4 10.75 0.82 
 -1 -13 -4 12.03 0.94 
 -1 -13 -4 9.49 1.02 
 1 -13 4 11.12 0.83 
 -1 13 -4 10.48 1.2 
 1 13 4 11.42 1.05 
 2 -13 4 9.53 0.74 
 -2 -13 -4 9.39 0.84 
 -2 -13 -4 11.37 1.2 
 2 -13 4 10.47 0.85 
 2 -13 4 10.26 1.21 
 -2 13 -4 8.27 1.11 
 2 13 4 10.24 0.98 
 -3 -13 -4 12.17 1.23 
 -3 -13 -4 11.51 0.55 
 -3 -13 -4 12.59 0.97 
 3 -13 4 12.54 1.35 
 3 -13 4 12.11 0.75 
 3 -13 4 11.53 0.98 
 -3 13 -4 10.22 1.24 
 3 13 4 12.57 1.01 
 -4 -13 -4 0.06 0.7 
 -4 -13 -4 0.39 0.26 
 4 -13 4 0.83 0.75 
 -4 -13 -4 0.78 0.47 
 4 -13 4 0.4 0.37 
 4 13 4 1.36 0.57 
 -4 13 -4 -0.36 0.72 
 5 -13 4 0.1 0.38 
 -5 -13 -4 0.2 0.37 
 -5 -13 -4 0.42 0.47 
 5 -13 4 -1.06 0.64 
 -5 -13 -4 0.87 0.76 
 -5 13 -4 -1.12 0.68 
 5 13 4 0.15 0.49 
 -6 -13 -4 5.16 0.75 
 6 -13 4 3.75 1.06 
 -6 -13 -4 4.81 1.07 
 -6 13 -4 6.96 1.22 
 7 -13 4 7.77 1.3 
 -7 -13 -4 8.44 0.96 
 -7 -13 -4 6.37 1.19 
 -7 13 -4 7.6 1.34 
 -8 -13 -4 7.93 1.3 
 -8 -13 -4 8.96 0.98 
 8 -13 4 6.45 1.16 
 -8 13 -4 9.33 1.41 
 9 -13 4 5.87 1.26 
 -9 -13 -4 7.75 1.04 
 -9 -13 -4 7.94 1.34 
 -9 13 -4 7.51 1.27 
 -10 -13 -4 -0.05 0.71 
 10 -13 4 1.28 0.96 
 -10 -13 -4 -0.64 0.98 
 -10 13 -4 -0.09 0.93 
 -11 -13 -4 2.85 0.92 
 11 -13 4 4.9 1.16 
 -11 -13 -4 5.46 1.37 
 -11 13 -4 6.22 1.36 
 -11 -14 4 5.8 1.23 
 11 -14 -4 4.26 1.15 
 -11 -14 4 3.34 1.3 
 -11 -14 4 4.09 0.71 
 11 14 -4 4.67 1.26 
 -11 14 4 4.98 1.23 
 10 -14 -4 -0.3 0.78 
 10 -14 -4 -0.04 0.88 
 -10 -14 4 0.75 0.85 
 -10 -14 4 0.54 0.49 
 -10 -14 4 -0.11 1.02 
 -10 14 4 -1.68 0.74 
 10 14 -4 0.01 0.95 
 -9 -14 4 5.01 1.01 
 -9 -14 4 3.25 1.13 
 9 -14 -4 3.51 1.03 
 9 -14 -4 2.99 0.99 
 -9 -14 4 2.54 0.49 
 -9 -14 4 2.8 0.5 
 -9 14 4 5.01 1.03 
 9 14 -4 4.73 1.18 
 -8 -14 4 0.58 0.3 
 -8 -14 4 -0.22 0.68 
 -8 -14 4 0.18 0.91 
 8 -14 -4 0.38 0.81 
 8 -14 -4 -0.43 0.78 
 -8 -14 4 0.09 0.29 
 8 14 -4 0.21 0.8 
 -8 14 4 0.64 0.71 
 7 -14 -4 9.66 1.22 
 7 -14 -4 9 1.29 
 -7 -14 4 10.26 1.14 
 -7 -14 4 9.74 1.28 
 -7 -14 4 10.58 1.1 
 -7 -14 4 8.89 1.07 
 -7 14 4 9.02 1.04 
 7 14 -4 8.9 1.28 
 -6 -14 4 1.49 0.67 
 6 -14 -4 1.27 0.79 
 6 -14 -4 1.45 0.85 
 -6 -14 4 1.16 0.63 
 -6 -14 4 1.8 0.7 
 -6 -14 4 1.39 0.75 
 -6 14 4 0.15 0.56 
 6 14 -4 1.27 0.82 
 -5 -14 4 2.76 0.71 
 -5 -14 4 2.54 0.77 
 -5 -14 4 2.66 0.71 
 -5 -14 4 2.37 0.7 
 5 -14 -4 4.92 0.91 
 5 14 -4 2.91 0.9 
 -5 14 4 3.1 0.65 
 4 -14 -4 22.8 1.56 
 -4 -14 4 22.53 1.4 
 -4 -14 4 22.16 1.43 
 -4 -14 4 25.66 1.5 
 -4 -14 4 21.89 1.39 
 4 14 -4 22.95 1.64 
 -3 -14 4 5.02 0.78 
 -3 -14 4 4.61 0.8 
 -3 -14 4 4.98 0.78 
 -3 -14 4 4.35 0.8 
 3 -14 -4 3.39 0.81 
 3 14 -4 4.08 0.95 
 -3 14 4 6.32 0.98 
 -2 -14 4 1.81 0.72 
 2 -14 -4 0.89 0.68 
 -2 -14 4 1.83 0.67 
 -2 -14 4 1.92 0.55 
 2 14 -4 2.21 0.72 
 -2 14 4 1.14 0.7 
 1 -14 -4 5.56 0.77 
 -1 -14 4 5.86 0.71 
 1 -14 -4 5.4 0.9 
 -1 -14 4 5.62 0.96 
 1 14 -4 5 0.94 
 -1 14 4 5.52 0.89 
 0 -14 -4 1.41 0.7 
 0 -14 4 2.72 0.87 
 0 -14 -4 2.02 0.58 
 0 -14 4 2.45 0.43 
 0 -14 4 1.91 0.5 
 0 14 -4 0.93 0.72 
 0 14 4 2.33 0.67 
 1 -14 4 8.34 0.75 
 1 -14 4 8.44 0.76 
 -1 -14 -4 6.34 0.76 
 1 -14 4 7.09 1.11 
 -1 -14 -4 8.24 1.04 
 1 14 4 8.58 0.98 
 -1 14 -4 7.05 1.17 
 -2 -14 -4 1.31 0.73 
 2 -14 4 0.54 0.4 
 2 -14 4 1.13 0.7 
 -2 -14 -4 0.98 0.5 
 2 -14 4 0.56 0.48 
 2 14 4 2.77 0.69 
 -2 14 -4 0.82 0.84 
 -3 -14 -4 19.8 1.55 
 3 -14 4 19.52 1 
 -3 -14 -4 21.17 1.2 
 3 -14 4 20.41 1.76 
 3 -14 4 19.04 1.26 
 3 14 4 17.77 1.21 
 -3 14 -4 18.15 1.49 
 4 -14 4 1.08 0.84 
 4 -14 4 0.44 0.41 
 -4 -14 -4 1.13 0.5 
 -4 -14 -4 -0.85 0.71 
 -4 14 -4 0.27 0.79 
 4 14 4 0.41 0.52 
 -5 -14 -4 24.56 1.39 
 -5 -14 -4 27.48 1.84 
 5 -14 4 25.58 1.8 
 -5 14 -4 23.43 1.74 
 5 14 4 26.66 1.47 
 6 -14 4 3.25 1.04 
 -6 -14 -4 3.74 0.7 
 -6 -14 -4 3.03 0.98 
 -6 14 -4 3.72 1.09 
 -7 -14 -4 0.7 0.94 
 7 -14 4 0.87 0.89 
 -7 -14 -4 0.9 0.58 
 -7 14 -4 -2.3 0.82 
 8 -14 4 0.35 0.82 
 -8 -14 -4 0.92 0.63 
 -8 -14 -4 0.59 0.93 
 -8 14 -4 0.25 0.98 
 9 -14 4 -0.61 0.92 
 -9 -14 -4 2.88 1.1 
 -9 -14 -4 0.77 0.64 
 -9 14 -4 -0.1 1.01 
 -10 -14 -4 2.78 0.87 
 10 -14 4 3.57 1.18 
 -10 -14 -4 2.52 1.21 
 -10 14 -4 3.25 1.29 
 -10 14 -4 1.25 1.11 
 -10 -15 4 2.81 1.22 
 10 -15 -4 1.47 0.99 
 10 -15 -4 1.5 0.98 
 -10 -15 4 3.39 1.04 
 -10 -15 4 2.09 0.5 
 -10 15 4 0.6 0.9 
 10 15 -4 1.41 1.1 
 -9 -15 4 1.48 0.84 
 -9 -15 4 2.1 1.1 
 -9 -15 4 1.89 0.39 
 -9 -15 4 1.99 0.39 
 9 -15 -4 3.01 1.09 
 9 -15 -4 2.54 1.02 
 -9 15 4 1.4 0.86 
 9 15 -4 1.35 1.02 
 8 -15 -4 1.06 0.87 
 -8 -15 4 0.03 0.72 
 -8 -15 4 1.65 0.99 
 8 -15 -4 2 0.94 
 8 15 -4 0.31 0.85 
 -8 15 4 1.41 0.8 
 7 -15 -4 7.52 1.25 
 -7 -15 4 6.71 1.18 
 -7 -15 4 7.13 1.06 
 7 -15 -4 6.94 1.13 
 -7 -15 4 6.9 0.98 
 -7 -15 4 8.03 1.07 
 -7 15 4 7.66 1.03 
 7 15 -4 7.88 1.32 
 6 -15 -4 0.64 0.74 
 -6 -15 4 -0.75 0.55 
 6 -15 -4 -0.72 0.75 
 -6 -15 4 -0.56 0.51 
 -6 -15 4 -0.06 0.62 
 -6 -15 4 0.17 0.73 
 6 15 -4 -0.35 0.75 
 -6 15 4 0.46 0.61 
 -5 -15 4 1.07 0.67 
 5 -15 -4 -0.43 0.72 
 -5 -15 4 1.39 0.66 
 -5 -15 4 1.25 0.65 
 -5 -15 4 1.72 0.64 
 5 15 -4 1.2 0.84 
 -4 -15 4 0.27 0.56 
 -4 -15 4 0.56 0.56 
 -4 -15 4 0.31 0.57 
 4 -15 -4 -0.22 0.7 
 -4 -15 4 0.12 0.57 
 4 15 -4 -0.6 0.69 
 3 -15 -4 6.94 0.99 
 -3 -15 4 5.94 0.91 
 -3 -15 4 6.6 0.96 
 -3 -15 4 8.64 0.98 
 -3 -15 4 7.46 0.92 
 -3 15 4 4.3 0.97 
 3 15 -4 5.44 1.04 
 -2 -15 4 9.1 1.14 
 -2 -15 4 9.48 1.08 
 -2 -15 4 10.28 0.99 
 2 -15 -4 12.43 1.26 
 2 15 -4 11.66 1.32 
 -2 15 4 9.81 1.16 
 -1 -15 4 1.55 0.82 
 -1 -15 4 0.82 0.51 
 1 -15 -4 1.19 0.72 
 1 15 -4 1.31 0.75 
 -1 15 4 1.69 0.71 
 0 -15 -4 7.11 0.86 
 0 -15 -4 8.16 1.08 
 0 -15 4 9.7 0.9 
 0 -15 4 9.67 1.24 
 0 15 -4 6.43 1.05 
 0 15 4 7.76 1.05 
 -1 -15 -4 -0.5 0.69 
 1 -15 4 0.53 0.42 
 1 -15 4 0.08 0.76 
 -1 -15 -4 0.65 0.52 
 1 -15 4 0.06 0.41 
 1 15 4 1.28 0.65 
 -1 15 -4 -0.41 0.74 
 2 -15 4 0.38 0.48 
 2 -15 4 0.24 0.39 
 -2 -15 -4 0.56 0.47 
 2 -15 4 1.13 0.87 
 -2 -15 -4 0.39 0.73 
 -2 15 -4 0.72 0.79 
 2 15 4 0.88 0.63 
 3 -15 4 0.57 0.71 
 3 -15 4 0.63 0.42 
 -3 -15 -4 0.81 0.5 
 -3 -15 -4 -0.16 0.77 
 3 15 4 0.42 0.56 
 -3 15 -4 -0.29 0.73 
 4 -15 4 2.79 0.9 
 -4 -15 -4 1.66 0.8 
 -4 -15 -4 2.34 0.62 
 4 15 4 0.72 0.57 
 -4 15 -4 1.05 0.89 
 -5 -15 -4 0.69 0.49 
 5 -15 4 -0.39 0.72 
 -5 -15 -4 1.47 0.92 
 -5 15 -4 -0.22 0.88 
 5 15 4 -0.26 0.58 
 -6 -15 -4 3.9 0.71 
 -6 -15 -4 2.72 0.96 
 6 -15 4 4.3 1.18 
 -6 15 -4 3.34 1.07 
 7 -15 4 5.39 1.26 
 -7 -15 -4 3.57 1.11 
 -7 -15 -4 5.74 0.84 
 -7 15 -4 5.53 1.27 
 -8 -15 -4 3.59 1.16 
 -8 -15 -4 3.76 0.77 
 8 -15 4 2.08 1.15 
 -8 15 -4 3.24 1.3 
 -9 -15 -4 0.21 0.66 
 9 -15 4 1.31 1.06 
 -9 -15 -4 0.71 1.06 
 -9 15 -4 1.46 1.17 
 10 -15 4 7.2 1.44 
 -10 -15 -4 3.69 1.23 
 -10 -15 -4 4.69 0.96 
 -10 15 -4 4.87 1.45 
 -9 -16 4 0.96 0.81 
 -9 -16 4 0.06 1.01 
 9 -16 -4 -0.63 0.94 
 9 -16 -4 1.81 0.98 
 9 16 -4 0.33 0.94 
 -8 -16 4 -0.13 0.94 
 8 -16 -4 0.43 0.89 
 8 -16 -4 0.4 0.92 
 -8 -16 4 0.47 0.72 
 8 16 -4 0.56 0.94 
 -7 -16 4 0.84 0.69 
 -7 -16 4 -0.47 0.84 
 -7 -16 4 0.37 0.67 
 -7 -16 4 0.56 1.11 
 7 -16 -4 0.97 0.83 
 7 -16 -4 0.3 0.9 
 7 16 -4 -0.72 0.83 
 -6 -16 4 2.99 0.86 
 -6 -16 4 3.89 0.94 
 -6 -16 4 1.97 0.72 
 6 -16 -4 3.55 0.97 
 6 -16 -4 3.4 1.1 
 -6 -16 4 2.53 0.76 
 6 16 -4 1.09 0.87 
 -5 -16 4 3.47 0.83 
 5 -16 -4 4.02 0.99 
 -5 -16 4 2.11 0.76 
 -5 -16 4 3.63 0.84 
 -5 -16 4 2.52 0.77 
 5 16 -4 2.98 1.03 
 -4 -16 4 3.72 0.79 
 -4 -16 4 3.15 0.81 
 -4 -16 4 2.78 0.79 
 4 -16 -4 2.89 0.88 
 -4 -16 4 4.54 0.87 
 4 16 -4 4.25 1.03 
 -4 16 4 3.05 0.98 
 3 -16 -4 1.94 0.82 
 -3 -16 4 1.62 0.65 
 -3 -16 4 1.44 0.64 
 -3 -16 4 2.25 0.76 
 -3 -16 4 0.65 0.66 
 3 16 -4 0.31 0.81 
 -3 16 4 1.91 0.84 
 -2 -16 4 2.78 0.66 
 -2 -16 4 2.33 0.75 
 -2 -16 4 1.46 0.61 
 -2 -16 4 1.79 0.79 
 2 -16 -4 0.8 0.79 
 2 16 -4 2.65 0.94 
 -2 16 4 1.73 0.79 
 -1 -16 4 0.79 0.54 
 -1 -16 4 0.8 0.79 
 1 -16 -4 0.56 0.75 
 1 16 -4 -0.43 0.7 
 -1 16 4 1.27 0.71 
 0 -16 -4 5.09 0.8 
 0 -16 4 4.71 0.7 
 0 -16 4 3.78 0.96 
 0 -16 -4 3.83 0.97 
 0 16 -4 5.92 1.15 
 0 16 4 4.61 0.94 
 1 -16 4 7.02 0.79 
 1 -16 4 6.45 1.19 
 -1 -16 -4 5.01 1.04 
 -1 -16 -4 6.23 0.85 
 -1 16 -4 7.87 1.28 
 1 16 4 6.35 1 
 2 -16 4 -0.23 0.82 
 -2 -16 -4 0.26 0.77 
 -2 -16 -4 -0.67 0.44 
 2 -16 4 -0.18 0.42 
 -2 16 -4 0.17 0.85 
 2 16 4 0.26 0.66 
 3 -16 4 1.12 0.87 
 -3 -16 -4 1.47 0.57 
 -3 -16 -4 1.73 0.91 
 3 16 4 2.4 0.71 
 -3 16 -4 0.17 0.88 
 4 -16 4 5.36 1.19 
 -4 -16 -4 4.2 0.71 
 -4 -16 -4 2.6 1.03 
 -4 16 -4 5.13 1.13 
 4 16 4 5.53 0.9 
 -5 -16 -4 0.37 0.52 
 -5 -16 -4 1.1 0.83 
 5 -16 4 1.31 1 
 -5 16 -4 -0.02 0.8 
 -6 -16 -4 6.54 0.85 
 -6 -16 -4 8.32 1.37 
 6 -16 4 7.32 1.4 
 -6 16 -4 9.07 1.56 
 -7 -16 -4 3.4 0.75 
 7 -16 4 4.5 1.24 
 -7 -16 -4 3.15 1.02 
 -7 16 -4 4.93 1.3 
 8 -16 4 -0.35 0.98 
 -8 -16 -4 -0.48 0.57 
 -8 -16 -4 -1.42 0.88 
 -8 16 -4 0.98 1.08 
 9 -16 4 4.67 1.32 
 -9 -16 -4 4.09 0.86 
 -9 -16 -4 2.66 1.2 
 -9 16 -4 5.34 1.41 
 9 -17 -4 0.56 1.04 
 -9 -17 4 -0.68 1.02 
 9 17 -4 2.14 1.06 
 -8 -17 4 1.08 1 
 8 -17 -4 0.37 0.85 
 8 -17 -4 1.15 0.95 
 -8 -17 4 2.04 0.8 
 8 17 -4 1.28 0.94 
 7 -17 -4 0.18 0.98 
 -7 -17 4 -0.13 0.66 
 -7 -17 4 0.27 0.89 
 7 -17 -4 -1.11 0.79 
 -7 -17 4 0.77 0.78 
 7 17 -4 0.75 0.98 
 6 -17 -4 3.25 1.02 
 -6 -17 4 3.3 0.9 
 6 -17 -4 4.13 1.17 
 -6 -17 4 1.89 0.78 
 -6 -17 4 4.49 0.93 
 -6 -17 4 4.78 1.04 
 6 17 -4 3.2 1.12 
 -5 -17 4 2.68 0.86 
 -5 -17 4 1.99 0.79 
 -5 -17 4 3.1 0.85 
 5 -17 -4 2.44 0.94 
 -5 -17 4 2.18 0.72 
 5 17 -4 2.87 0.99 
 -5 17 4 2.55 1 
 -4 -17 4 1.08 0.72 
 -4 -17 4 1.68 0.7 
 -4 -17 4 1.01 0.75 
 4 -17 -4 0.28 0.82 
 -4 -17 4 0.68 0.61 
 4 17 -4 0.8 0.85 
 -4 17 4 0.88 0.88 
 -3 -17 4 1.04 0.65 
 3 -17 -4 1.12 0.8 
 -3 -17 4 0.63 0.67 
 -3 -17 4 1.01 0.69 
 -3 -17 4 0.53 0.57 
 -3 17 4 -0.12 0.75 
 3 17 -4 0.74 0.9 
 -2 -17 4 13.69 1.28 
 2 -17 -4 15.31 1.53 
 -2 -17 4 15.35 1.59 
 -2 -17 4 16.73 1.55 
 -2 -17 4 15.02 1.27 
 -2 17 4 15.62 1.52 
 2 17 -4 16.13 1.71 
 -1 -17 4 1.37 0.8 
 1 -17 -4 2.49 0.9 
 -1 -17 4 2.67 0.7 
 -1 17 4 3.21 0.93 
 1 17 -4 5.26 1.16 
 0 -17 4 8.65 1.33 
 0 -17 -4 10.18 1.32 
 0 -17 4 8.96 0.94 
 0 17 -4 9.86 1.43 
 0 17 4 8.66 1.16 
 1 -17 4 1.12 0.82 
 -1 -17 -4 -0.4 0.5 
 -1 -17 -4 -0.51 0.78 
 1 -17 4 0.03 0.48 
 1 17 4 -1.39 0.59 
 -1 17 -4 1.1 0.92 
 -2 -17 -4 -0.71 0.8 
 -2 -17 -4 0.87 0.56 
 2 -17 4 0.31 0.86 
 -2 17 -4 0.01 0.76 
 2 17 4 -0.38 0.61 
 3 -17 4 0.6 0.87 
 -3 -17 -4 1.08 0.55 
 -3 -17 -4 1.31 0.93 
 -3 17 -4 0.74 0.97 
 3 17 4 1.88 0.74 
 -4 -17 -4 0.7 0.55 
 4 -17 4 0.8 0.95 
 -4 -17 -4 0.42 0.86 
 4 17 4 1.02 0.67 
 -4 17 -4 -1.56 0.86 
 -5 -17 -4 0.07 0.53 
 -5 -17 -4 -0.14 0.9 
 5 -17 4 -0.02 0.87 
 -5 17 -4 0.37 0.96 
 -6 -17 -4 2.45 1.09 
 6 -17 4 1.33 1.02 
 -6 -17 -4 1.51 0.64 
 -6 17 -4 2.24 1.14 
 -7 -17 -4 -1.25 0.9 
 7 -17 4 0.19 1.06 
 -7 -17 -4 0.44 0.59 
 -7 17 -4 -0.59 1.01 
 8 -17 4 8.24 1.51 
 -8 -17 -4 7.68 1.39 
 -8 -17 -4 10.29 1.06 
 -8 17 -4 8.42 1.55 
 -8 -18 4 -0.41 0.96 
 8 -18 -4 -0.27 0.92 
 8 -18 -4 0.45 1.02 
 8 18 -4 -1.67 0.87 
 -7 -18 4 1.9 0.85 
 -7 -18 4 1.78 1.01 
 7 -18 -4 -0.47 0.9 
 -7 -18 4 1.05 0.79 
 7 -18 -4 0.65 0.99 
 7 18 -4 0.33 1 
 -6 -18 4 0.3 0.75 
 -6 -18 4 1.53 0.7 
 -6 -18 4 -0.41 0.64 
 6 -18 -4 -1.18 0.85 
 6 -18 -4 -0.98 0.9 
 -6 -18 4 -0.9 0.71 
 6 18 -4 -1.22 0.82 
 -6 18 4 -0.87 0.86 
 5 -18 -4 2.73 1.13 
 -5 -18 4 3.63 0.92 
 -5 -18 4 3.53 0.96 
 5 -18 -4 3.91 1.05 
 -5 -18 4 5.03 0.98 
 -5 -18 4 2.69 0.82 
 5 18 -4 5.18 1.16 
 -5 18 4 4.66 1.2 
 -4 -18 4 1.69 0.75 
 4 -18 -4 1.27 0.92 
 -4 -18 4 2.52 0.87 
 -4 -18 4 2.58 0.85 
 -4 -18 4 1.69 0.74 
 -4 18 4 1.76 0.92 
 4 18 -4 1.8 0.97 
 -3 -18 4 5.61 1.04 
 3 -18 -4 7.45 1.22 
 -3 -18 4 4.35 1.01 
 -3 -18 4 5.63 0.95 
 -3 -18 4 5.48 0.95 
 3 18 -4 4.6 1.22 
 -3 18 4 4.83 1.15 
 2 -18 -4 1.22 0.86 
 -2 -18 4 -0.05 0.84 
 -2 -18 4 1.14 0.63 
 -2 -18 4 1.94 0.78 
 -2 -18 4 0.72 0.64 
 -2 18 4 0.49 0.78 
 2 18 -4 0.77 0.97 
 -1 -18 4 0.81 0.61 
 1 -18 -4 0.38 0.85 
 -1 -18 4 0.95 0.84 
 -1 18 4 1.51 0.87 
 1 18 -4 1.45 1.01 
 0 -18 -4 -0.36 0.75 
 0 -18 4 0.24 0.91 
 0 -18 4 -0.24 0.53 
 0 18 -4 -0.47 0.87 
 0 18 4 0.37 0.76 
 1 -18 4 8.7 1.43 
 -1 -18 -4 9.33 1.29 
 -1 -18 -4 6.8 0.9 
 -1 18 -4 8.91 1.36 
 1 18 4 8.44 1.2 
 -2 -18 -4 5.48 0.84 
 -2 -18 -4 4.8 1.13 
 2 -18 4 4.49 1.16 
 2 18 4 4.87 0.98 
 -2 18 -4 4.78 1.28 
 3 -18 4 -0.18 0.8 
 -3 -18 -4 -0.05 0.91 
 -3 -18 -4 -0.56 0.51 
 -3 18 -4 -1.54 0.9 
 3 18 4 -0.21 0.63 
 -4 -18 -4 -0.49 0.5 
 -4 -18 -4 1.32 0.89 
 4 -18 4 -0.75 0.92 
 -4 18 -4 0.57 1.03 
 4 18 4 0.6 0.76 
 5 -18 4 1.97 1 
 -5 -18 -4 3.13 0.71 
 -5 -18 -4 1.11 1.02 
 -5 18 -4 3.5 1.29 
 -6 -18 -4 0.86 1.05 
 6 -18 4 1.76 1.14 
 -6 -18 -4 -0.71 0.53 
 -6 18 -4 -0.99 1.03 
 7 -18 4 2.26 1.06 
 -7 -18 -4 2.42 0.74 
 -7 -18 -4 3.42 1.31 
 -7 18 -4 3.53 1.38 
 -6 -19 4 2.33 0.91 
 -6 -19 4 3.88 1.12 
 6 -19 -4 3.24 1.15 
 6 -19 -4 5.11 1.33 
 -6 19 4 2.52 1.26 
 6 19 -4 3.21 1.21 
 -5 -19 4 1.12 0.81 
 5 -19 -4 0.14 0.92 
 -5 -19 4 0.71 0.78 
 -5 -19 4 0.72 0.74 
 5 -19 -4 -0.07 1.04 
 5 19 -4 -0.39 0.93 
 -5 19 4 -0.24 0.9 
 -4 -19 4 0.7 0.76 
 4 -19 -4 1.17 0.88 
 -4 -19 4 1.06 0.75 
 -4 -19 4 2.04 0.79 
 -4 -19 4 1.79 0.88 
 4 19 -4 1.78 1.04 
 -4 19 4 0.18 0.88 
 -3 -19 4 1.61 0.92 
 -3 -19 4 0.77 0.82 
 -3 -19 4 1 0.71 
 -3 -19 4 0.08 0.69 
 3 -19 -4 1.36 0.96 
 3 19 -4 0.29 0.99 
 -3 19 4 0.87 0.95 
 -2 -19 4 7.16 1.03 
 -2 -19 4 5.77 1.09 
 -2 -19 4 6.6 1.23 
 2 -19 -4 6.76 1.23 
 -2 -19 4 7.36 1 
 -2 19 4 7.53 1.26 
 2 19 -4 6.33 1.35 
 1 -19 -4 5.57 1.16 
 -1 -19 4 4.05 1.16 
 -1 -19 4 6.37 0.93 
 1 19 -4 2.36 1.08 
 -1 19 4 4.61 1.07 
 0 -19 4 0.99 1.04 
 0 -19 -4 0.84 0.91 
 0 19 4 2.11 0.89 
 0 19 -4 2.44 1.08 
 1 -19 4 5.1 1.33 
 -1 -19 -4 2.49 1.03 
 1 19 4 4.85 1.11 
 -1 19 -4 7.77 1.41 
 -2 -19 -4 4.09 1.1 
 -2 -19 -4 1.87 0.7 
 2 -19 4 3.73 1.13 
 -2 19 -4 2.36 1.13 
 2 19 4 2.62 0.92 
 -3 -19 -4 -1.38 0.86 
 3 -19 4 1.74 1.1 
 -3 -19 -4 0.51 0.6 
 3 19 4 1.89 0.81 
 -3 19 -4 -0.02 1.05 
 4 -19 4 -0.66 0.96 
 -4 -19 -4 2.04 1.11 
 -4 -19 -4 0.43 0.6 
 -4 19 -4 0.02 1.12 
 -5 -19 -4 1.87 1.11 
 -5 -19 -4 0.29 0.59 
 5 -19 4 0.27 1 
 -5 19 -4 1.57 1.15 
 6 -19 4 1.22 1.2 
 -6 -19 -4 2.55 1.23 
 -6 -19 -4 1.06 0.64 
 -6 19 -4 2.47 1.25 
 -5 -20 4 6.62 1.17 
 -5 -20 4 6.2 1.19 
 -5 -20 4 7.12 1.21 
 5 -20 -4 8.54 1.33 
 5 -20 -4 5.46 1.36 
 5 20 -4 6.9 1.47 
 -5 20 4 7.07 1.43 
 -4 -20 4 0.83 0.79 
 -4 -20 4 2.27 0.89 
 4 -20 -4 2.34 1.21 
 4 -20 -4 0.53 0.99 
 -4 -20 4 0.78 0.78 
 4 20 -4 1.15 1.14 
 -4 20 4 0.51 1.03 
 -3 -20 4 4.46 0.95 
 -3 -20 4 3.85 1.1 
 -3 -20 4 7.23 1.22 
 3 -20 -4 5.18 1.18 
 3 20 -4 3.56 1.29 
 -3 20 4 4.83 1.19 
 -2 -20 4 1.99 1.05 
 -2 -20 4 0.63 0.83 
 -2 -20 4 0.88 0.69 
 2 -20 -4 1.4 0.99 
 2 20 -4 1.18 1.07 
 -2 20 4 0.15 0.92 
 1 -20 -4 2.08 1.03 
 -1 -20 4 1.67 1.09 
 1 20 -4 0.05 1.02 
 -1 20 4 1.59 0.97 
 0 -20 -4 -0.4 0.89 
 0 -20 4 -0.31 0.99 
 0 20 4 -0.39 0.73 
 0 20 -4 -0.68 0.99 
 1 -20 4 4.2 1.34 
 -1 -20 -4 3.57 1.11 
 -1 20 -4 4.46 1.41 
 1 20 4 2.64 0.99 
 -2 -20 -4 0.28 0.96 
 2 -20 4 -0.02 1.05 
 2 20 4 -0.01 0.81 
 -2 20 -4 2.59 1.27 
 -3 -20 -4 7.28 1.35 
 3 -20 4 7.95 1.52 
 -3 -20 -4 7.08 0.93 
 -3 20 -4 9.86 1.66 
 3 20 4 7.43 1.19 
 -4 -20 -4 1.29 1.12 
 4 -20 4 0.53 1.18 
 -4 -20 -4 -0.48 0.57 
 -4 20 -4 0.99 1.2 
 2 -21 -4 -0.17 0.92 
 -2 -21 4 0.88 0.93 
 -2 -21 4 0.03 0.92 
 2 21 -4 0.4 1.17 
 -2 21 4 0.06 0.92 
 -1 -21 4 1.24 1.11 
 1 -21 -4 2.9 1.16 
 1 21 -4 1.3 1.17 
 -1 21 4 2.01 1.01 
 0 -21 4 4.1 1.28 
 0 -21 -4 7.39 1.31 
 0 21 -4 3.51 1.37 
 0 21 4 4.79 1.18 
 1 -21 4 0.4 1.07 
 -1 -21 -4 2.65 1.09 
 -1 21 -4 -0.68 1.14 
 1 21 4 2.11 0.97 
 -2 -21 -4 5.11 1.22 
 2 -21 4 2.61 1.26 
 -2 21 -4 4.14 1.39 
 2 21 4 3.51 1.06 
 -14 0 5 -0.63 0.95 
 -14 0 5 -0.3 1.05 
 -13 0 5 5.95 1.04 
 -13 0 5 5.06 1.23 
 -13 0 5 3.89 1.15 
 -12 0 5 -0.23 0.81 
 -12 0 5 0.95 0.99 
 -12 0 5 -0.64 0.63 
 -11 0 5 0.79 0.81 
 -11 0 5 -0.23 0.75 
 -11 0 5 -1.47 0.59 
 -10 0 5 1.15 0.72 
 -10 0 5 -1 0.55 
 -10 0 5 0.11 0.76 
 -9 0 5 37.12 1.88 
 -9 0 5 33.31 1.85 
 -8 0 5 0.01 0.51 
 -8 0 5 -0.63 0.59 
 -7 0 5 12.88 1.07 
 -7 0 5 12.81 1.01 
 -7 0 5 9.56 0.99 
 -6 0 5 0.67 0.56 
 -6 0 5 -0.18 0.41 
 -6 0 5 -0.07 0.41 
 -5 0 5 21.72 1.16 
 -5 0 5 22.55 1.19 
 5 0 -5 21.24 1.16 
 5 0 -5 22.27 0.77 
 -5 0 5 19.82 1.13 
 4 0 -5 0.17 0.24 
 4 0 -5 -0.13 0.47 
 -4 0 5 0.11 0.41 
 -4 0 5 0.44 0.25 
 -4 0 5 0.07 0.4 
 -3 0 5 27.75 1.21 
 -3 0 5 28.46 1.22 
 3 0 -5 29.56 1.25 
 -3 0 5 26.24 1.22 
 -3 0 5 26.76 1.33 
 3 0 -5 25.72 1.02 
 3 0 -5 29.73 1.26 
 -3 0 5 28.35 1.04 
 -2 0 5 0 0.37 
 2 0 -5 0.07 0.32 
 -2 0 5 0.17 0.31 
 2 0 -5 -0.1 0.22 
 -2 0 5 0.25 0.46 
 2 0 -5 0.29 0.43 
 -2 0 5 0.33 0.35 
 2 0 -5 -0.26 0.37 
 -2 0 5 0.16 0.36 
 -1 0 5 84.05 2.69 
 1 0 -5 82.15 2.63 
 -1 0 5 86.82 2.66 
 1 0 -5 88.31 2.7 
 -1 0 5 85.1 2.64 
 1 0 -5 83.07 2.64 
 1 0 -5 83.45 2.59 
 -1 0 5 82.69 2.58 
 0 0 -5 -0.21 0.33 
 0 0 5 0.04 0.29 
 0 0 -5 -0.03 0.3 
 0 0 5 -0.06 0.35 
 0 0 -5 0.2 0.38 
 0 0 5 -0.36 0.34 
 0 0 5 -0.52 0.37 
 0 0 -5 -0.05 0.4 
 -1 0 -5 9.93 0.75 
 -1 0 -5 9.47 0.74 
 1 0 5 9.7 0.81 
 1 0 5 9.04 0.66 
 -1 0 -5 9.26 0.57 
 -1 0 -5 9.89 0.67 
 1 0 5 9.55 0.75 
 1 0 5 9.28 0.57 
 -2 0 -5 0.16 0.42 
 -2 0 -5 0.29 0.49 
 2 0 5 0.61 0.38 
 -2 0 -5 0.03 0.32 
 -2 0 -5 0.03 0.29 
 2 0 5 0.17 0.29 
 2 0 5 1.02 0.46 
 2 0 5 0.19 0.44 
 2 0 5 0.14 0.36 
 -3 0 -5 101.57 3.09 
 3 0 5 102.63 3.11 
 3 0 5 107.46 3.26 
 -3 0 -5 100.84 3.3 
 3 0 5 102.68 3.29 
 -3 0 -5 106.08 3.26 
 3 0 5 104.69 3.36 
 4 0 5 -0.97 0.43 
 4 0 5 -0.33 0.42 
 -4 0 -5 0.48 0.34 
 -4 0 -5 -0.26 0.46 
 -4 0 -5 0.01 0.46 
 4 0 5 0.34 0.32 
 5 0 5 6.57 0.88 
 -5 0 -5 4.84 0.68 
 -5 0 -5 6.67 0.77 
 5 0 5 7.06 0.82 
 -5 0 -5 6.68 0.63 
 5 0 5 7.74 0.58 
 -6 0 -5 -0.42 0.48 
 6 0 5 0.1 0.31 
 6 0 5 -0.17 0.49 
 -6 0 -5 -0.68 0.49 
 7 0 5 25 1.01 
 7 0 5 21.52 1.35 
 7 0 5 23.11 1 
 -7 0 -5 20.97 1.33 
 -7 0 -5 24.24 1.4 
 8 0 5 -0.44 0.27 
 -8 0 -5 -1.03 0.56 
 8 0 5 -0.44 0.5 
 -8 0 -5 0.82 0.65 
 9 0 5 66.62 2.7 
 -9 0 -5 70.44 2.87 
 -9 0 -5 69.51 2.86 
 -10 0 -5 -0.61 0.64 
 10 0 5 0.74 0.63 
 -10 0 -5 -0.65 0.64 
 -11 0 -5 3.28 1 
 -11 0 -5 2.35 1.02 
 11 0 5 1.01 0.71 
 -12 0 -5 0.37 0.96 
 -12 0 -5 0.83 0.9 
 -13 0 -5 0.67 1.07 
 -13 0 -5 1.47 1.05 
 -14 -1 5 2.05 1.09 
 -14 -1 5 2.78 1.28 
 -14 1 5 2.69 1.14 
 -14 1 5 1.97 1.2 
 -13 -1 5 3.56 1.2 
 -13 -1 5 2.09 1.03 
 -13 1 5 2.3 1.15 
 -13 1 5 2.71 0.91 
 -13 1 5 3.55 1.16 
 -12 -1 5 2.31 0.99 
 -12 -1 5 4.73 0.89 
 -12 -1 5 5.04 1.11 
 -12 1 5 4.52 0.96 
 -12 1 5 2.98 1.04 
 -12 1 5 2.61 1.15 
 -11 -1 5 21.65 1.74 
 -11 -1 5 21.16 1.48 
 -11 -1 5 24 1.75 
 -11 1 5 23.36 1.74 
 -11 1 5 21.34 1.69 
 -11 1 5 24.2 1.6 
 -10 -1 5 -0.39 0.66 
 -10 -1 5 -0.54 0.66 
 -10 1 5 -0.06 0.69 
 -10 1 5 0.38 0.72 
 -10 1 5 0.55 0.65 
 -9 -1 5 0.42 0.65 
 -9 -1 5 0.11 0.6 
 -9 1 5 0.52 0.56 
 -9 1 5 1.02 0.65 
 -9 1 5 0.39 0.64 
 -8 -1 5 2.29 0.64 
 -8 -1 5 1.9 0.66 
 -8 1 5 0.62 0.57 
 -8 1 5 2.55 0.66 
 -8 1 5 1.09 0.62 
 -7 -1 5 12.77 1.11 
 -7 -1 5 14.52 1.04 
 -7 -1 5 11.71 1.01 
 -7 1 5 14.02 1.19 
 -7 1 5 15.09 1.11 
 -7 1 5 13.66 1.14 
 6 -1 -5 25.17 0.87 
 -6 -1 5 25.56 1.28 
 -6 -1 5 25.07 1.36 
 -6 -1 5 24.76 1.27 
 6 -1 -5 26.14 1.39 
 -6 1 5 25.38 1.34 
 -6 1 5 24.03 1.32 
 -6 1 5 24.42 1.34 
 -5 -1 5 10.64 0.83 
 5 -1 -5 11.14 0.98 
 5 -1 -5 10.88 0.56 
 -5 -1 5 11.01 0.96 
 -5 -1 5 11.31 0.87 
 -5 1 5 11.89 0.95 
 5 1 -5 10.15 0.43 
 -5 1 5 11.08 0.9 
 -5 1 5 9.76 0.83 
 4 -1 -5 3.06 0.6 
 -4 -1 5 2.35 0.48 
 4 -1 -5 2.43 0.34 
 -4 -1 5 3.04 0.29 
 -4 -1 5 2.84 0.61 
 -4 -1 5 2.55 0.55 
 4 1 -5 1.63 0.55 
 -4 1 5 2.55 0.51 
 -4 1 5 3.09 0.59 
 4 1 -5 2.35 0.31 
 3 -1 -5 3.37 0.42 
 -3 -1 5 2.56 0.52 
 -3 -1 5 2.79 0.51 
 3 -1 -5 3.69 0.55 
 -3 -1 5 3.52 0.47 
 -3 -1 5 3.57 0.57 
 -3 -1 5 3.86 0.38 
 3 -1 -5 3.11 0.57 
 3 -1 -5 2.77 0.5 
 -3 1 5 3.29 0.44 
 -3 1 5 3.19 0.55 
 -3 1 5 3.67 0.57 
 3 1 -5 3.52 0.48 
 3 1 -5 3.81 0.4 
 3 1 -5 3.49 0.55 
 2 -1 -5 2.6 0.46 
 -2 -1 5 1.51 0.42 
 -2 -1 5 2.27 0.4 
 -2 -1 5 2.15 0.5 
 2 -1 -5 3.41 0.46 
 -2 -1 5 2.34 0.36 
 2 -1 -5 2.81 0.51 
 2 -1 -5 2.49 0.45 
 -2 -1 5 2.92 0.5 
 -2 1 5 3.26 0.48 
 -2 1 5 2.12 0.48 
 2 1 -5 2.24 0.4 
 2 1 -5 2.07 0.45 
 2 1 -5 2.35 0.48 
 -2 1 5 2.45 0.42 
 -2 1 5 2.54 0.45 
 2 1 -5 2.92 0.42 
 -1 -1 5 26.81 1.11 
 -1 -1 5 26.69 1.02 
 -1 -1 5 25.42 1.17 
 1 -1 -5 28.27 1.17 
 1 -1 -5 26.11 1.09 
 -1 -1 5 27.55 1.1 
 1 -1 -5 26.8 1.14 
 1 1 -5 27.79 1.04 
 1 1 -5 28.28 1.13 
 -1 1 5 24.74 1.1 
 -1 1 5 25.68 1.05 
 -1 1 5 25.93 1.14 
 -1 1 5 27.42 1.2 
 -1 1 5 26.52 1.08 
 1 1 -5 27.08 1.17 
 0 -1 5 4.34 0.51 
 0 -1 -5 4.52 0.53 
 0 -1 5 4.29 0.54 
 0 -1 -5 4.3 0.57 
 0 -1 -5 4 0.46 
 0 -1 5 4.72 0.58 
 0 -1 -5 3.81 0.53 
 0 -1 5 3.87 0.38 
 0 1 5 4.79 0.55 
 0 1 5 3.8 0.59 
 0 1 5 4.1 0.54 
 0 1 -5 4.05 0.39 
 0 1 -5 4.13 0.53 
 0 1 5 4.17 0.45 
 0 1 -5 4.71 0.56 
 -1 -1 -5 5.54 0.6 
 1 -1 5 5.59 0.57 
 1 -1 5 4.8 0.57 
 -1 -1 -5 5.08 0.48 
 1 -1 5 5.26 0.39 
 -1 -1 -5 5.88 0.53 
 -1 -1 -5 4.74 0.57 
 1 -1 5 4.18 0.51 
 1 1 5 5.29 0.48 
 1 1 5 6.09 0.55 
 -1 1 -5 5.27 0.59 
 1 1 5 5.65 0.5 
 1 1 5 4.54 0.55 
 -1 1 -5 5.23 0.54 
 -1 1 -5 4.65 0.54 
 1 1 5 5.03 0.6 
 -1 1 -5 4.82 0.39 
 -2 -1 -5 18.62 0.83 
 2 -1 5 18.77 0.96 
 2 -1 5 17.45 0.98 
 2 -1 5 16.76 0.71 
 -2 -1 -5 16.88 0.82 
 2 -1 5 19.45 1.03 
 -2 -1 -5 19.3 1.12 
 -2 -1 -5 18.53 1 
 2 -1 5 18.34 0.89 
 -2 1 -5 18.3 0.73 
 2 1 5 18.23 0.85 
 -2 1 -5 17.12 0.93 
 2 1 5 18 0.83 
 2 1 5 16.81 1 
 2 1 5 17.15 0.87 
 2 1 5 17.68 1 
 3 -1 5 78.96 2.53 
 -3 -1 -5 73.89 2.41 
 -3 -1 -5 71.53 2.51 
 3 -1 5 75.06 2.55 
 3 -1 5 75.3 2.38 
 -3 -1 -5 74.74 2.36 
 -3 -1 -5 72.97 2.28 
 -3 1 -5 75.83 2.48 
 3 1 5 74.05 2.51 
 3 1 5 72.21 2.27 
 -3 1 -5 72.1 2.24 
 3 1 5 76.3 2.44 
 3 1 5 72.97 2.54 
 -3 1 -5 75.12 2.52 
 -4 -1 -5 -0.04 0.46 
 -4 -1 -5 0.53 0.45 
 4 -1 5 0.01 0.42 
 -4 -1 -5 0.36 0.35 
 4 -1 5 0.57 0.45 
 4 -1 5 -0.06 0.34 
 -4 1 -5 -0.16 0.31 
 -4 1 -5 0.23 0.43 
 4 1 5 0.16 0.49 
 4 1 5 0.56 0.29 
 -4 1 -5 0.16 0.46 
 4 1 5 0.59 0.48 
 -5 -1 -5 110.28 3.35 
 -5 -1 -5 106.01 3.43 
 5 -1 5 108.79 3.26 
 5 -1 5 104.72 3.52 
 -5 -1 -5 108.46 3.51 
 5 -1 5 105.65 3.52 
 5 1 5 103.54 3.13 
 -5 1 -5 108.26 3.5 
 -5 1 -5 101.31 3.49 
 -5 1 -5 104.38 3.24 
 5 1 5 108.41 3.54 
 -6 -1 -5 1.72 0.59 
 -6 -1 -5 1.99 0.5 
 -6 -1 -5 0.92 0.54 
 6 -1 5 0.58 0.51 
 6 1 5 1.8 0.33 
 -6 1 -5 2.33 0.58 
 -6 1 -5 0.87 0.54 
 6 1 5 0.52 0.53 
 -7 -1 -5 4.42 0.77 
 7 -1 5 4.22 0.72 
 7 -1 5 4.56 0.52 
 -7 -1 -5 5.18 0.84 
 -7 1 -5 4.86 0.82 
 -7 1 -5 4.96 0.76 
 7 1 5 5.4 0.79 
 7 1 5 4.53 0.43 
 7 1 5 4.37 0.42 
 -8 -1 -5 7.3 0.95 
 -8 -1 -5 7.93 1.01 
 8 -1 5 6.87 0.89 
 8 1 5 6.99 0.52 
 -8 1 -5 8.75 1.05 
 8 1 5 7.15 0.85 
 -8 1 -5 5.42 0.87 
 9 -1 5 20.3 1.36 
 -9 -1 -5 18.66 1.49 
 -9 -1 -5 20.57 1.44 
 -9 1 -5 20.25 1.53 
 -9 1 -5 22.18 1.56 
 9 1 5 20.05 1.39 
 -10 -1 -5 0.31 0.7 
 10 -1 5 0.01 0.65 
 -10 -1 -5 0.73 0.73 
 -10 1 -5 0.37 0.75 
 10 1 5 -0.01 0.62 
 -10 1 -5 -0.34 0.67 
 11 -1 5 -0.33 0.65 
 -11 -1 -5 0.2 0.88 
 -11 -1 -5 0.88 0.81 
 -11 1 -5 -0.24 0.68 
 11 1 5 0.04 0.66 
 -11 1 -5 0.85 0.9 
 -12 -1 -5 -0.9 0.78 
 -12 -1 -5 -0.23 0.92 
 -12 1 -5 1.2 0.92 
 -12 1 -5 0.21 0.77 
 -13 -1 -5 -0.83 0.89 
 -13 -1 -5 -0.07 0.99 
 -13 1 -5 0.61 0.92 
 -14 -2 5 0.59 0.96 
 -14 -2 5 1.22 1.22 
 -14 2 5 1.43 1.24 
 -14 2 5 1.43 1.11 
 -13 -2 5 3.13 1.09 
 -13 -2 5 3.08 1.25 
 -13 2 5 3.6 1.15 
 -13 2 5 1.33 0.85 
 -13 2 5 4.5 1.29 
 -12 -2 5 2.28 0.75 
 -12 -2 5 3.41 1 
 -12 -2 5 2.48 1.09 
 -12 2 5 3.45 1.16 
 -12 2 5 2.11 1 
 -12 2 5 1.69 0.81 
 -11 -2 5 7 0.92 
 -11 -2 5 8.38 1.14 
 -11 -2 5 6.92 1.17 
 -11 2 5 7.97 1.28 
 -11 2 5 8.62 1.1 
 -11 2 5 6.57 1.2 
 -10 -2 5 30.58 1.87 
 -10 -2 5 33.46 1.88 
 -10 2 5 29.86 1.84 
 -10 2 5 30.75 1.91 
 -10 2 5 35.48 1.8 
 -9 -2 5 5.35 0.98 
 -9 -2 5 7.86 0.98 
 -9 2 5 6.84 1 
 -9 2 5 7.52 0.95 
 -9 2 5 8.43 1.12 
 8 -2 -5 16.6 0.66 
 8 -2 -5 16.1 0.65 
 -8 -2 5 15.98 1.25 
 -8 -2 5 15.41 1.2 
 -8 2 5 17.26 1.22 
 -8 2 5 18.08 1.35 
 -8 2 5 18.47 1.33 
 -8 2 5 19.27 1.31 
 -7 -2 5 37.82 1.82 
 7 -2 -5 42.41 1.88 
 -7 -2 5 38.59 1.72 
 7 -2 -5 40.98 1.32 
 7 -2 -5 38.88 1.31 
 -7 -2 5 41.04 1.74 
 -7 2 5 40.49 1.83 
 -7 2 5 39.02 1.86 
 -7 2 5 38.22 1.82 
 6 -2 -5 3.11 0.36 
 -6 -2 5 2.27 0.53 
 -6 -2 5 2.77 0.57 
 -6 -2 5 2.01 0.58 
 6 -2 -5 3.39 0.67 
 -6 2 5 2.3 0.65 
 -6 2 5 2.65 0.6 
 -6 2 5 3.09 0.65 
 5 -2 -5 2.9 0.62 
 -5 -2 5 3.63 0.26 
 -5 -2 5 2.92 0.56 
 -5 -2 5 3.12 0.53 
 5 -2 -5 2.69 0.37 
 -5 -2 5 2.59 0.49 
 -5 -2 5 3.02 0.59 
 -5 2 5 3.56 0.63 
 -5 2 5 2.85 0.58 
 -5 2 5 3.09 0.63 
 4 -2 -5 1.1 0.32 
 -4 -2 5 0.93 0.52 
 -4 -2 5 1.35 0.24 
 -4 -2 5 0.75 0.39 
 4 -2 -5 0.39 0.49 
 -4 -2 5 0.97 0.44 
 -4 2 5 1.37 0.49 
 4 2 -5 0.63 0.48 
 -4 2 5 1.18 0.44 
 4 2 -5 1.12 0.26 
 3 -2 -5 45.05 1.7 
 -3 -2 5 45.79 1.58 
 3 -2 -5 44.36 1.68 
 -3 -2 5 42.39 1.45 
 -3 -2 5 47.48 1.7 
 3 -2 -5 42.32 1.55 
 3 -2 -5 47.85 1.64 
 -3 -2 5 44.69 1.64 
 -3 -2 5 44.73 1.73 
 3 2 -5 44.77 1.72 
 3 2 -5 45.17 1.49 
 -3 2 5 44.14 1.72 
 3 2 -5 43.91 1.57 
 -3 2 5 41.67 1.61 
 -2 -2 5 114.94 3.54 
 2 -2 -5 122.25 3.59 
 -2 -2 5 122.35 3.54 
 2 -2 -5 117.1 3.62 
 -2 -2 5 121.1 3.68 
 2 -2 -5 125.53 3.56 
 2 -2 -5 115.07 3.63 
 -2 -2 5 117.36 3.52 
 -2 -2 5 120.6 3.66 
 2 -2 -5 120.55 3.69 
 2 2 -5 118.19 3.66 
 -2 2 5 116.69 3.61 
 -2 2 5 117.46 3.58 
 2 2 -5 119.4 3.54 
 -2 2 5 119.31 3.63 
 -2 2 5 117.42 3.54 
 2 2 -5 114.99 3.51 
 2 2 -5 118.73 3.57 
 -1 -2 5 40.03 1.42 
 -1 -2 5 37.67 1.34 
 -1 -2 5 40.37 1.44 
 1 -2 -5 40.27 1.52 
 1 -2 -5 40.14 1.51 
 1 -2 -5 39.01 1.52 
 1 -2 -5 40.41 1.47 
 -1 -2 5 39.22 1.49 
 1 2 -5 38.68 1.39 
 1 2 -5 41.26 1.53 
 -1 2 5 39.31 1.47 
 -1 2 5 39.47 1.5 
 -1 2 5 40.7 1.47 
 1 2 -5 38.94 1.36 
 1 2 -5 40.55 1.47 
 -1 2 5 38.43 1.36 
 0 -2 5 46.68 1.68 
 0 -2 -5 46.7 1.64 
 0 -2 5 46.04 1.46 
 0 -2 -5 46.58 1.65 
 0 -2 5 48.34 1.72 
 0 -2 5 48.46 1.63 
 0 -2 -5 47.68 1.69 
 0 -2 -5 48.39 1.72 
 0 2 5 47.56 1.65 
 0 2 5 44.28 1.68 
 0 2 -5 49.25 1.73 
 0 2 -5 45.83 1.69 
 0 2 -5 45.16 1.47 
 0 2 5 48.26 1.75 
 0 2 -5 46.51 1.61 
 1 -2 5 1.8 0.43 
 -1 -2 -5 1.7 0.44 
 1 -2 5 1.95 0.54 
 -1 -2 -5 1.92 0.53 
 -1 -2 -5 2.13 0.48 
 1 -2 5 1.93 0.43 
 1 -2 5 1.86 0.25 
 -1 -2 -5 2.12 0.41 
 -1 2 -5 1.67 0.46 
 1 2 5 2.38 0.48 
 1 2 5 1.79 0.34 
 -1 2 -5 1.6 0.25 
 1 2 5 2.36 0.55 
 1 2 5 1.65 0.41 
 -1 2 -5 1.29 0.48 
 1 2 5 2.06 0.41 
 -2 -2 -5 2.92 0.5 
 -2 -2 -5 2.72 0.46 
 2 -2 5 2.4 0.57 
 2 -2 5 2.19 0.48 
 2 -2 5 3.18 0.53 
 -2 -2 -5 2.74 0.41 
 2 -2 5 2.16 0.56 
 -2 2 -5 3.09 0.53 
 2 2 5 2.44 0.55 
 2 2 5 2.49 0.45 
 2 2 5 3.09 0.55 
 2 2 5 2.9 0.41 
 2 2 5 2.64 0.39 
 -2 2 -5 2.37 0.26 
 -3 -2 -5 176.28 5.16 
 3 -2 5 172.61 5.31 
 -3 -2 -5 177.74 5.13 
 -3 -2 -5 180.1 5.01 
 3 -2 5 177.04 5.17 
 3 -2 5 182.06 5.27 
 -3 -2 -5 174.5 5.26 
 3 2 5 173.11 5 
 -3 2 -5 175.39 5.26 
 3 2 5 175.01 5.25 
 -3 2 -5 176.14 4.94 
 3 2 5 172.39 5.14 
 3 2 5 174.28 5.32 
 3 2 5 176.03 5.13 
 -3 2 -5 179.01 5.27 
 -4 -2 -5 25.48 1.17 
 4 -2 5 26.06 1.31 
 -4 -2 -5 26.54 1.32 
 -4 -2 -5 26.68 1.19 
 4 -2 5 26.04 1.35 
 4 2 5 28.51 1.39 
 -4 2 -5 25.21 1.3 
 -4 2 -5 25.9 0.99 
 4 2 5 26.74 0.95 
 -4 2 -5 25.35 1.27 
 -5 -2 -5 11.8 0.86 
 5 -2 5 12.97 1.02 
 -5 -2 -5 12.29 0.99 
 -5 -2 -5 10.97 0.86 
 5 -2 5 12.52 1.03 
 -5 2 -5 11.59 0.98 
 -5 2 -5 11.52 0.97 
 5 2 5 10.54 0.55 
 5 2 5 12.07 1.05 
 -6 -2 -5 1.9 0.61 
 6 -2 5 1.56 0.53 
 -6 -2 -5 1.03 0.54 
 -6 -2 -5 1.11 0.48 
 6 -2 5 1.79 0.68 
 -6 2 -5 1.06 0.64 
 6 2 5 1.48 0.26 
 6 2 5 1.82 0.6 
 -6 2 -5 2.87 0.67 
 7 -2 5 24.94 1.47 
 -7 -2 -5 27.36 1.4 
 -7 -2 -5 29.08 1.49 
 -7 -2 -5 26.7 1.34 
 7 2 5 26.64 0.91 
 7 2 5 25.24 0.9 
 7 2 5 24.52 1.42 
 -7 2 -5 27.18 1.53 
 -7 2 -5 26.58 1.48 
 -8 -2 -5 10.02 1.06 
 8 -2 5 10.61 1.07 
 -8 -2 -5 11.71 1.12 
 8 2 5 11.65 1.09 
 -8 2 -5 11.92 1.15 
 8 2 5 10.48 0.5 
 -8 2 -5 9.73 1.08 
 -9 -2 -5 13.26 1.32 
 -9 -2 -5 14.03 1.33 
 9 -2 5 15.38 1.3 
 -9 2 -5 13.9 1.37 
 9 2 5 13.26 1.19 
 -9 2 -5 15.72 1.38 
 -10 -2 -5 11.84 1.32 
 10 -2 5 9.77 1.11 
 -10 -2 -5 8.57 1.12 
 10 2 5 8.82 1.06 
 -10 2 -5 11.38 1.38 
 -10 2 -5 9.36 1.22 
 -11 -2 -5 1.32 0.88 
 11 -2 5 0.48 0.68 
 -11 -2 -5 -0.52 0.78 
 11 2 5 -0.26 0.58 
 -11 2 -5 0.52 0.78 
 -11 2 -5 0.33 0.89 
 -12 -2 -5 3.73 1.11 
 -12 -2 -5 5.12 1.15 
 -12 2 -5 2.5 1.02 
 -13 -2 -5 -1.78 0.83 
 -13 -2 -5 -0.04 0.86 
 -13 2 -5 -0.42 0.91 
 -14 -3 5 3.89 1.42 
 -14 -3 5 7.72 1.41 
 -14 3 5 5.81 1.38 
 -14 3 5 7.52 1.5 
 -13 -3 5 -0.12 1.07 
 -13 -3 5 1.14 0.97 
 -13 3 5 0.33 1.06 
 -13 3 5 1.06 1.01 
 -13 3 5 -0.27 0.79 
 -12 -3 5 4.5 1.18 
 -12 -3 5 5 1.09 
 -12 -3 5 5.6 0.9 
 -12 3 5 5.89 1.14 
 -12 3 5 5.61 1.21 
 -12 3 5 3.58 0.95 
 -11 -3 5 4.52 0.96 
 -11 -3 5 2.07 1.05 
 -11 3 5 4.84 0.94 
 -11 3 5 3.22 1.01 
 -11 3 5 3.27 1.05 
 -10 -3 5 -0.06 0.62 
 -10 -3 5 -0.17 0.78 
 -10 3 5 -0.04 0.74 
 -10 3 5 -0.05 0.68 
 -10 3 5 0.9 0.69 
 9 -3 -5 5.47 0.5 
 -9 -3 5 6.83 0.9 
 -9 -3 5 6.34 1.06 
 -9 3 5 6.98 0.98 
 -9 3 5 4.84 0.93 
 -9 3 5 6.27 1.02 
 8 -3 -5 5.52 0.91 
 8 -3 -5 5.42 0.47 
 -8 -3 5 4.55 0.89 
 -8 -3 5 4.17 0.7 
 8 -3 -5 5.13 0.46 
 -8 3 5 5.04 0.8 
 -8 3 5 4.11 0.78 
 -8 3 5 6.02 0.86 
 -8 3 5 6.26 0.91 
 7 -3 -5 5.39 0.48 
 -7 -3 5 5.5 0.72 
 -7 -3 5 5.66 0.84 
 7 -3 -5 5.49 0.49 
 7 -3 -5 4.5 0.75 
 -7 3 5 5.65 0.81 
 -7 3 5 6.38 0.84 
 -7 3 5 6.2 0.84 
 -7 3 5 6.47 0.87 
 -6 -3 5 1.23 0.44 
 6 -3 -5 -0.18 0.52 
 -6 -3 5 -0.42 0.38 
 -6 -3 5 -0.07 0.4 
 -6 -3 5 -0.11 0.54 
 6 -3 -5 0.21 0.3 
 -6 3 5 0.04 0.47 
 -6 3 5 0.61 0.51 
 -6 3 5 -0.28 0.47 
 -5 -3 5 -0.36 0.16 
 5 -3 -5 0.32 0.32 
 -5 -3 5 -0.13 0.46 
 -5 -3 5 -0.31 0.34 
 5 -3 -5 0.5 0.5 
 -5 -3 5 0.33 0.37 
 -5 -3 5 1.38 0.46 
 -5 3 5 -0.1 0.43 
 -5 3 5 0.55 0.47 
 5 3 -5 0.14 0.5 
 -5 3 5 0.6 0.5 
 4 -3 -5 11.91 0.93 
 4 -3 -5 9.61 0.67 
 -4 -3 5 11.54 0.97 
 -4 -3 5 9.92 0.77 
 -4 -3 5 10.51 0.72 
 -4 -3 5 9.3 0.55 
 -4 3 5 11.4 0.91 
 4 3 -5 12.79 0.98 
 4 3 -5 9.93 0.56 
 -4 3 5 10.21 0.83 
 -3 -3 5 0.25 0.37 
 -3 -3 5 0.37 0.27 
 3 -3 -5 0.36 0.43 
 3 -3 -5 0.61 0.36 
 -3 -3 5 0.76 0.38 
 3 -3 -5 0.69 0.38 
 -3 -3 5 0.91 0.32 
 -3 -3 5 -0.37 0.48 
 3 -3 -5 -0.14 0.44 
 -3 3 5 0.53 0.38 
 3 3 -5 0.28 0.3 
 3 3 -5 0.29 0.42 
 -3 3 5 0.31 0.45 
 2 -3 -5 11.51 0.79 
 -2 -3 5 10.09 0.63 
 2 -3 -5 11.04 0.66 
 -2 -3 5 9.42 0.67 
 -2 -3 5 11.11 0.82 
 -2 -3 5 10.64 0.64 
 2 -3 -5 9.62 0.74 
 2 -3 -5 10.95 0.82 
 -2 -3 5 10.03 0.77 
 -2 3 5 10.36 0.78 
 2 3 -5 9.21 0.6 
 2 3 -5 10.14 0.71 
 -2 3 5 9.83 0.66 
 -1 -3 5 84.6 2.55 
 1 -3 -5 85.88 2.68 
 1 -3 -5 83.31 2.69 
 1 -3 -5 86.42 2.7 
 1 -3 -5 79.33 2.64 
 -1 -3 5 81.93 2.68 
 -1 -3 5 80.48 2.49 
 -1 -3 5 83.31 2.63 
 -1 3 5 81.58 2.48 
 1 3 -5 85.38 2.71 
 1 3 -5 81.96 2.52 
 1 3 -5 84.83 2.66 
 -1 3 5 83.44 2.7 
 -1 3 5 82.28 2.65 
 -1 3 5 80.16 2.65 
 0 -3 -5 52.23 1.85 
 0 -3 -5 53.93 1.84 
 0 -3 5 54.41 1.92 
 0 -3 5 53.12 1.62 
 0 -3 5 54.54 1.79 
 0 -3 5 53.63 1.88 
 0 -3 -5 54.25 1.9 
 0 -3 -5 50.64 1.9 
 0 3 -5 55.7 1.93 
 0 3 5 55.97 1.87 
 0 3 -5 51.27 1.77 
 0 3 -5 55.61 1.91 
 0 3 5 52.79 1.9 
 0 3 5 53.39 1.96 
 1 -3 5 8.68 0.69 
 1 -3 5 9.63 0.76 
 -1 -3 -5 5.98 0.64 
 1 -3 5 7.79 0.35 
 -1 -3 -5 8.21 0.63 
 -1 -3 -5 7.17 0.64 
 1 -3 5 8.87 0.77 
 -1 3 -5 8.65 0.89 
 1 3 5 7.25 0.49 
 1 3 5 8.13 0.76 
 -1 3 -5 7.22 0.35 
 1 3 5 9.17 0.7 
 -1 3 -5 7.85 0.61 
 1 3 5 7.43 0.69 
 2 -3 5 12.15 0.93 
 -2 -3 -5 11.76 0.63 
 -2 -3 -5 10.41 0.83 
 2 -3 5 11.13 0.82 
 2 -3 5 10.03 0.8 
 -2 -3 -5 11.23 0.83 
 2 3 5 11.71 0.65 
 2 3 5 11.42 0.93 
 2 3 5 10.78 0.77 
 2 3 5 12.47 0.85 
 -3 -3 -5 39.27 1.59 
 3 -3 5 38.46 1.58 
 -3 -3 -5 37.13 1.4 
 3 -3 5 37.53 1.62 
 -3 -3 -5 39.2 1.54 
 -3 -3 -5 38.76 1.29 
 -3 3 -5 36.82 1.55 
 3 3 5 42.71 1.71 
 -3 3 -5 38.02 1.19 
 3 3 5 40.31 1.43 
 -3 3 -5 38.28 1.63 
 3 3 5 44.9 2.2 
 4 -3 5 97.92 3.3 
 -4 -3 -5 99.75 3.18 
 -4 -3 -5 101.1 3.1 
 -4 -3 -5 97.28 3.22 
 4 -3 5 96.17 3.24 
 4 3 5 104.89 3.12 
 -4 3 -5 98.77 2.88 
 4 3 5 97.13 3.3 
 -4 3 -5 101.25 3.31 
 -4 3 -5 94.06 3.24 
 5 -3 5 113.42 3.57 
 5 -3 5 108.28 3.56 
 -5 -3 -5 100.4 3.4 
 -5 -3 -5 106.75 3.38 
 -5 -3 -5 103.06 3.49 
 5 3 5 109.3 3.55 
 -5 3 -5 102.16 3.51 
 -5 3 -5 105.12 3.52 
 -6 -3 -5 3.23 0.64 
 6 -3 5 2.71 0.65 
 -6 -3 -5 3.19 0.64 
 6 -3 5 3.04 0.66 
 -6 -3 -5 2.12 0.55 
 -6 3 -5 4.05 0.72 
 -6 3 -5 3.72 0.45 
 -6 3 -5 1.38 0.57 
 6 3 5 2.79 0.63 
 -7 -3 -5 2.08 0.63 
 7 -3 5 2.44 0.68 
 -7 -3 -5 2.1 0.67 
 -7 -3 -5 2.26 0.61 
 7 3 5 2.46 0.65 
 -7 3 -5 3.27 0.78 
 -7 3 -5 3.28 0.7 
 -8 -3 -5 12.95 1.18 
 -8 -3 -5 8.65 0.98 
 -8 -3 -5 10.51 1.04 
 8 -3 5 13.47 1.21 
 -8 3 -5 10.89 1.14 
 -8 3 -5 10.91 1.15 
 8 3 5 10.71 1.04 
 9 -3 5 3.55 0.82 
 -9 -3 -5 5.69 0.95 
 -9 -3 -5 4.84 0.83 
 -9 -3 -5 3.35 0.82 
 -9 3 -5 4.44 0.89 
 -9 3 -5 2.98 0.85 
 9 3 5 4.71 0.81 
 -10 -3 -5 3.98 0.88 
 10 -3 5 5.36 0.94 
 -10 -3 -5 3.9 0.95 
 -10 -3 -5 4.01 0.92 
 -10 3 -5 2.79 0.88 
 10 3 5 4.05 0.85 
 -10 3 -5 3.76 0.94 
 -11 -3 -5 0.49 0.8 
 -11 -3 -5 -0.02 0.83 
 11 -3 5 0.22 0.68 
 -11 -3 -5 0.43 0.72 
 -11 3 -5 -0.09 0.84 
 -11 3 -5 0.57 0.92 
 11 3 5 0.01 0.63 
 -12 -3 -5 1.75 0.91 
 -12 -3 -5 0.8 0.9 
 -12 -3 -5 -0.56 0.79 
 -12 3 -5 0.41 0.87 
 -13 -3 -5 0.96 0.84 
 -13 -3 -5 0.82 0.96 
 -13 -3 -5 1.47 1.04 
 -13 3 -5 3.4 1.3 
 -14 -4 5 -1.19 0.85 
 -14 -4 5 0.04 1.03 
 -14 4 5 -0.05 0.87 
 -14 4 5 1.03 1.06 
 -13 -4 5 3.53 1.16 
 -13 -4 5 4.8 1.11 
 -13 4 5 2.85 1.01 
 -13 4 5 5.37 1.28 
 -13 4 5 2.42 1.16 
 -12 -4 5 4.1 1.24 
 -12 -4 5 4.82 1.05 
 -12 4 5 5.23 1.06 
 -12 4 5 5.62 1.27 
 -12 4 5 6.01 1.18 
 -11 -4 5 6.63 1.26 
 -11 -4 5 6.61 1.01 
 -11 4 5 5.5 1.15 
 -11 4 5 7.27 1.26 
 -11 4 5 6.16 1.11 
 -10 -4 5 22.74 1.66 
 -10 -4 5 23.1 1.5 
 -10 4 5 24.81 1.76 
 -10 4 5 22.35 1.6 
 -10 4 5 22.47 1.61 
 -9 -4 5 8.1 1.17 
 -9 -4 5 10.57 1.04 
 9 -4 -5 10.37 0.68 
 -9 4 5 10.1 1.18 
 -9 4 5 11.25 1.24 
 -9 4 5 10.71 1.18 
 -8 -4 5 41.77 1.84 
 -8 -4 5 45.14 2.13 
 8 -4 -5 43.31 1.57 
 8 -4 -5 45.27 2.01 
 -8 4 5 42.57 2.05 
 -8 4 5 39.81 1.97 
 -8 4 5 41.38 2 
 -8 4 5 44.26 2.08 
 7 -4 -5 4.21 0.77 
 -7 -4 5 3.74 0.8 
 7 -4 -5 4.15 0.5 
 -7 -4 5 4.31 0.64 
 -7 4 5 3.06 0.73 
 -7 4 5 3.29 0.73 
 -7 4 5 3.39 0.75 
 -7 4 5 4.28 0.78 
 -6 -4 5 17.79 1.16 
 -6 -4 5 16.75 0.97 
 6 -4 -5 17.18 0.86 
 -6 -4 5 17.14 0.99 
 -6 -4 5 14.22 0.94 
 6 -4 -5 15.5 1.09 
 -6 -4 5 15.54 0.59 
 -6 4 5 15.89 1.18 
 -6 4 5 14.71 1.08 
 -6 4 5 14.4 1.14 
 -6 4 5 14.27 1.01 
 6 4 -5 14.89 1.12 
 -5 -4 5 37.02 1.47 
 5 -4 -5 39.96 1.72 
 -5 -4 5 37.8 1.27 
 5 -4 -5 37.16 1.46 
 -5 -4 5 39.37 1.7 
 -5 -4 5 39.54 1.59 
 -5 -4 5 35.88 1.46 
 -5 4 5 36.02 1.69 
 -5 4 5 38.64 1.71 
 5 4 -5 39.08 1.69 
 -5 4 5 37.78 1.6 
 -5 4 5 43.93 1.79 
 4 -4 -5 23 1.06 
 -4 -4 5 22.08 1.1 
 -4 -4 5 21.86 0.92 
 4 -4 -5 20.24 1.16 
 -4 -4 5 21.64 1.2 
 -4 -4 5 22.3 0.99 
 -4 4 5 23.73 1.11 
 4 4 -5 23.45 1.24 
 -4 4 5 25 1.23 
 -3 -4 5 3.91 0.67 
 3 -4 -5 3.64 0.53 
 3 -4 -5 3.89 0.5 
 -3 -4 5 3.38 0.43 
 3 -4 -5 3.78 0.56 
 -3 -4 5 3.55 0.42 
 -3 -4 5 5.21 0.62 
 3 -4 -5 2.68 0.57 
 3 4 -5 4.68 0.68 
 3 4 -5 4.28 0.48 
 -3 4 5 4.64 0.53 
 -3 4 5 3.63 0.58 
 2 -4 -5 14.07 0.71 
 -2 -4 5 14.59 0.74 
 -2 -4 5 13.87 0.71 
 2 -4 -5 13.57 0.89 
 2 -4 -5 14.85 0.94 
 2 -4 -5 14.01 0.89 
 -2 -4 5 15.75 0.82 
 -2 -4 5 13.32 0.9 
 2 4 -5 13.48 0.67 
 2 4 -5 15.48 0.84 
 -2 4 5 14.75 0.89 
 -2 4 5 15.24 0.75 
 2 4 -5 14.77 0.95 
 -1 -4 5 1.29 0.29 
 1 -4 -5 0.6 0.43 
 -1 -4 5 0.66 0.3 
 1 -4 -5 0.54 0.4 
 -1 -4 5 1.26 0.51 
 1 -4 -5 0.55 0.41 
 -1 -4 5 0.34 0.34 
 -1 4 5 1.09 0.28 
 1 4 -5 1.32 0.43 
 -1 4 5 0.61 0.38 
 1 4 -5 0.87 0.29 
 0 -4 -5 49.45 1.79 
 0 -4 5 48.49 1.64 
 0 -4 -5 49.6 1.79 
 0 -4 5 48.37 1.83
[truncated: 2,490,931 more chars]
